# Supplementary material for: Efficacy and Safety of Vamorolone vs Placebo and Prednisone Among Boys With Duchenne Muscular Dystrophy: A Randomized Clinical Trial
Source: PubMed Central journal article supplement (PMC9425287; doi:10.1001/jamaneurol.2022.2480), 2022-08-29
Supplement: jamaneurol-e222480-s005.pdf [file jamaneurol-e222480-s005.pdf]

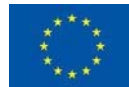

---

## CLINICAL STUDY PROTOCOL

### Amendment #4

---

**Document Title:** Amendment #4 for a Phase IIb Randomized, Double-blind, Parallel Group, Placebo- and Active-controlled Study with Double-Blind Extension to Assess the Efficacy and Safety of Vamorolone in Ambulant Boys with Duchenne Muscular Dystrophy (DMD)

---

**Protocol Number:** VBP15-004

**Document Number:** VBP15-004-A4 (Version 1.4)

**FDA IND No.:** 118,942

**Investigational Product:** Vamorolone

**Sponsor:** ReveraGen BioPharma, Inc.  
155 Gibbs St.  
Suite 433  
Rockville, MD 20850

**Medical Monitors:**

**Outside North America** John van den Anker, M.D., Ph.D.  
Phone: (202) 309 3735  
Email: [john.vandenanker@reveragen.com](mailto:john.vandenanker@reveragen.com)

**North America** Benjamin Schwartz, M.D., Ph.D.  
Phone: (314) 220 7067  
Email: [bdschw@camdengroup.com](mailto:bdschw@camdengroup.com)

**Document Date:** 28 August 2020

This document represents proprietary information belonging to ReveraGen BioPharma, Inc. Unauthorized reproduction of the whole or part of the document by any means is strictly prohibited. This protocol is provided to you as a Principal Investigator, potential Investigator or consultant for review by you, your staff and Institutional Review Board or Independent Ethics Committee. The information contained in this document is privileged and confidential and, except to the extent necessary to obtain informed consent, must not be disclosed unless such disclosure is required by federal or state law or regulations. Persons to whom the information is disclosed in confidence must be informed that the information is confidential and must not be disclosed by them to a third party.

**SIGNATURES OF AGREEMENT FOR VBP15-004-A4 (Version 1.4)**

**Amendment #4 for a Phase IIb Randomized, Double-blind, Parallel Group, Placebo-  
and Active-controlled Study with Double-Blind Extension to Assess the Efficacy and  
Safety of Vamorolone in Ambulant Boys with Duchenne Muscular Dystrophy  
(DMD)**

**Reviewed and Approved by:**

  
Electronically signed by: Eric Hoffman  
Reason: approved  
Date: Aug 28, 2020 10:03 EDT

Eric Hoffman, Ph.D. \_\_\_\_\_ Date \_\_\_\_\_  
Chief Executive Officer  
ReveraGen BioPharma, Inc.

  
Electronically signed by: Michela Guglieri  
Reason: I approve the document  
Date: Sep 2, 2020 06:30 GMT+1

Michela Guglieri, M.D. \_\_\_\_\_ Date \_\_\_\_\_  
Study Chair  
John Walton Muscular Dystrophy Research Centre

  
Electronically signed by: Paula R. Clemens  
Reason: I approve the document  
Date: Aug 31, 2020 09:42 EDT

Paula R. Clemens, M.D. \_\_\_\_\_ Date \_\_\_\_\_  
Study Vice Chair  
University of Pittsburgh School of Medicine

  
Electronically signed by: Johannes van den  
Anker  
Reason: approval  
Date: Sep 2, 2020 08:09 EDT

John van den Anker, M.D., Ph.D. \_\_\_\_\_ Date \_\_\_\_\_  
Medical Monitor  
Chief Medical Officer  
ReveraGen BioPharma, Inc.

  
Electronically signed by: Benjamin D. Schwartz  
Reason: Medical Monitor  
Date: Aug 28, 2020 11:26 CDT

Benjamin D. Schwartz, M.D., Ph.D. \_\_\_\_\_ Date \_\_\_\_\_  
Consulting Medical Monitor  
The Camden Group, LLC

  
Electronically signed by: Laurel J. Mengle-Gaw  
Reason: author  
Date: Aug 28, 2020 10:20 CDT

Laurel J. Mengle-Gaw, Ph.D. \_\_\_\_\_ Date \_\_\_\_\_  
Consulting Clinical Monitor  
The Camden Group, LLC

  
Electronically signed by: Mark Jaros  
Reason: I approve this document.  
Date: Sep 2, 2020 09:28 CDT

Mark J. Jaros, Ph.D. \_\_\_\_\_ Date \_\_\_\_\_  
Consulting Statistician  
Summit Analytical, LLC

112  
113 **INVESTIGATOR PROTOCOL AGREEMENT**  
114

115 **Amendment #4 for a Phase IIb Randomized, Double-blind, Parallel Group, Placebo-**  
116 **and Active-controlled Study with Double-Blind Extension to Assess the Efficacy and**  
117 **Safety of Vamorolone in Ambulant Boys with Duchenne Muscular Dystrophy**  
118 **(DMD)**

119 **PROTOCOL NUMBER: VBP15-004**  
120 **DOCUMENT NUMBER: VBP15-004-A4 (Version 1.4)**  
121 **SPONSOR: ReveraGen BioPharma, Inc.**  
122 **DOCUMENT DATE: 28 August 2020**

123 *By my signature, I confirm that my staff and I have carefully read and understand*  
124 *this protocol, protocol amendment, amended protocol, or revised protocol and agree*  
125 *to comply with the conduct and terms of the study specified herein and with any other*  
126 *study conduct procedures provided by ReveraGen BioPharma, Inc.*

127 *I agree to conduct the study according to this protocol and the obligations and*  
128 *requirements of clinical Investigators and all other requirements set out in the*  
129 *Declaration of Helsinki listed in 21 CFR part 312, and ICH principles of Good*  
130 *Clinical Practice (GCP) and in accordance with all applicable laws, guidances and*  
131 *directives of the jurisdiction where the study is being conducted. I will not initiate*  
132 *this study without the approval of an Institutional Review Board (IRB) or*  
133 *Independent Ethics Committee (IEC).*

134 *I understand that, should the decision be made by ReveraGen BioPharma, Inc. to*  
135 *terminate prematurely or suspend the study at any time for whatever reason, such*  
136 *decision will be communicated to me in writing. Conversely, should I decide to*  
137 *withdraw from execution of the study, I will communicate immediately such decision*  
138 *in writing to ReveraGen BioPharma, Inc.*

139 *For protocol amendments, I agree not to implement the amendment without*  
140 *agreement from ReveraGen BioPharma, Inc. and prior submission to and written*  
141 *approval (where required) from the IRB/IEC, except when necessary to eliminate an*  
142 *immediate hazard to the subjects, or for administrative aspects of the study (where*  
143 *permitted by all applicable regulatory requirements).*

144  
145  
146  
147 \_\_\_\_\_  
148 Investigator's Signature

147 \_\_\_\_\_  
148 Date

149  
150 \_\_\_\_\_  
151 Investigator's Name (Please print)  
152 Address (Please print):

153 **RETAIN THE ORIGINAL SIGNED AGREEMENT AT YOUR SITE AND RETURN AN**  
154 **ELECTRONIC SIGNED COPY TO REVERAGEN BIOPHARMA, INC., OR DESIGNEE**

155

156

**SERIOUS ADVERSE EVENT CONTACT INFORMATION**

157

158

**In the event of a serious adverse event (SAE) (see [Section 7.5](#)), the Investigator will**

159

**complete the SAE electronic case report form within 24 hours of first awareness of**

160

**the event. In the unlikely event that the electronic study database is inaccessible and**

161

**the Investigator is unable to complete the SAE electronic case report form within**

162

**24 hours, the SAE Notification Form (pdf) should be completed and emailed or**

163

**printed/faxed to the PRA safety management team within 24 hours, using the**

164

**contact information below:**

165

**In United States and Canada:**

166

**Email: [CHOSafety@prahs.com](mailto:CHOSafety@prahs.com)**

167

**Drug Safety Fax: 1 888 772 6919 or 1 434 951 3482**

168

**SAE Questions: Drug Safety Helpline: 1 800 772 2215**

169

**In Europe, Asia, Pacific, Africa and Australia:**

170

**Email: [MHGSafety@prahs.com](mailto:MHGSafety@prahs.com)**

171

**Drug Safety Fax: +44 1792 525720**

172

**SAE Questions: Drug Safety Helpline: +49 621 878 2154**

173  
174  
175

## PROTOCOL AMENDMENT TRACKING

| Document          | Document Number            | Approval Date    |
|-------------------|----------------------------|------------------|
| Original Protocol | VBP15-004                  | 15 December 2017 |
| Amendment #1      | VBP15-004-A1 (Version 1.1) | 04 May 2018      |
| Amendment #2      | VBP15-004-A2 (Version 1.2) | 05 March 2019    |
| Amendment #3      | VBP15-004-A3 (Version 1.3) | 21 May 2019      |
| Amendment #4      | VBP15-004-A4 (Version 1.4) | 28 August 2020   |

176  
177

### Reasons for Protocol Amendment #4:

1. To revise one of the primary objectives of the study to compare the efficacy of vamorolone administered orally at a dose of 6.0 mg/kg/day vs. placebo over a 24-week treatment period;
2. To revise the primary efficacy endpoint to TTSTAND velocity, comparison of vamorolone 6.0 mg/kg/day vs. placebo in change from baseline to Week 24, to align with the primary objective;
3. To add an additional secondary objective of the study to compare the efficacy of vamorolone administered orally at a dose of 2.0 mg/kg/day vs. placebo over a 24-week treatment period;
4. To delete a secondary objective of the study comparing the efficacy of vamorolone 2.0 mg/kg/day vs. 6.0 mg/kg/day over 24 weeks;
5. To revise the list of safety endpoints to include linear growth velocity, and to clarify the endpoints for BMI z-score and ACTH Stimulation Test;
6. To revise the secondary efficacy endpoints for Treatment Period #1;
7. To add exploratory efficacy endpoints for Treatment Period #1;
8. To add comparison of each vamorolone group to the placebo group for PARS III;
9. To clarify Ease of Study Drug Administration exploratory endpoint;
10. To revise the methodology for sample size calculation, in consideration of the revised primary efficacy endpoint;
11. To add a Per Protocol Population for statistical analyses;
12. To revise the multiple testing procedures for the efficacy endpoints;
13. To revise the statistical methodology for efficacy and safety analyses;
14. To clarify the circumstances under which hospitalizations should be considered serious adverse events;

200  
201

202

203 15. To add assessment of suicidality and abuse potential associated with treatment from  
204 examination of adverse event data;

205 16. To clarify that demographic and baseline characteristics summary tables will not be  
206 presented by age stratification;

207 17. To update the safety information presented in Section 1.5 Overall Benefit/Risk and  
208 the serious adverse event information presented in Section 5.4 Rationale for Dose  
209 Selection to include current data from the vamorolone program;

210 18. To remove analysis of biomarkers of immune suppression;

211 19. To clarify that levels, not ratios, of serum osteocalcin and CTX1 will be reported;

212 20. To clarify that analyses of candidate genetic modifiers of DMD will be presented in  
213 an addendum report;

214 21. To clarify that spine x-ray data will be analyzed in an addendum report;

215 22. To remove BMD z-score from the list of parameters assessed by DXA scan;

216 23. To add an endpoint for the assessment of tolerability; and

217 24. To correct typographical errors.

218

219 The Sections changed by Amendment #4 are listed in was/is format in [Appendix 15.1](#).

220

221 Additionally, a protocol clarification letter (Protocol Clarification Letter #2.1, 27 March  
222 2020) was issued to outline modifications that could be made to study conduct due to  
223 COVID-19. The main reasons for the Protocol Clarification Letter were as follows:

224 1. To detail the modifications to study conduct and site monitoring to be implemented  
225 during the global COVID-19 pandemic. Modifications are allowed to informed  
226 consent process; visit schedule and on-site study visits; collection of clinical  
227 laboratory assessments, weight, vital signs, efficacy assessments, adverse events  
228 and concomitant medications; dispense, return, and review of subject diaries;  
229 investigational product dispensing, administration, and compliance measurement;  
230 recording of COVID-19-related protocol deviations; transition to vamorolone  
231 general access program; and site monitoring. The key modifications to be made on  
232 a visit-, site-, or subject-specific basis are:

233 a. to allow for scheduled assessments to be performed remotely, with the  
234 exception of Screening assessments, which must be performed at the study  
235 site;

236 b. for critical safety assessments (i.e., clinical laboratory tests, collection of  
237 adverse events and concomitant medications), intervals between  
238 assessments should be no longer than 12 weeks;

239 c. in cases where on-site study visits are not possible for the completion of  
240 scheduled efficacy assessments, the Time to Stand Test (TTSTAND) will

241  
242  
243  
244  
245  
246

be conducted remotely by a trained clinical evaluator by  
videoconferencing interface; assessment of TTSTAND must be completed  
at the Baseline, Week 24, and Week 48 assessment time points;

- d. to allow for investigational product sufficient for 12 weeks of dosing to be shipped directly from the site to subjects' homes.

247  
248  
249

## STUDY SYNOPSIS

|                                     |                                                                                                                                                                                                                                                                                                                                                                                                                                                                                                                                                                                                                                                                                                                                                                                                                                                                                                                                                                                                                                                                                                                                                                                                                                                                                                                                                                                            |
|-------------------------------------|--------------------------------------------------------------------------------------------------------------------------------------------------------------------------------------------------------------------------------------------------------------------------------------------------------------------------------------------------------------------------------------------------------------------------------------------------------------------------------------------------------------------------------------------------------------------------------------------------------------------------------------------------------------------------------------------------------------------------------------------------------------------------------------------------------------------------------------------------------------------------------------------------------------------------------------------------------------------------------------------------------------------------------------------------------------------------------------------------------------------------------------------------------------------------------------------------------------------------------------------------------------------------------------------------------------------------------------------------------------------------------------------|
| <b>Protocol Title</b>               | A Phase IIb Randomized, Double-blind, Parallel Group, Placebo- and Active-controlled Study with Double-Blind Extension to Assess the Efficacy and Safety of Vamorolone in Ambulant Boys with Duchenne Muscular Dystrophy (DMD)                                                                                                                                                                                                                                                                                                                                                                                                                                                                                                                                                                                                                                                                                                                                                                                                                                                                                                                                                                                                                                                                                                                                                             |
| <b>Name of Sponsor</b>              | ReveraGen BioPharma, Inc.                                                                                                                                                                                                                                                                                                                                                                                                                                                                                                                                                                                                                                                                                                                                                                                                                                                                                                                                                                                                                                                                                                                                                                                                                                                                                                                                                                  |
| <b>Protocol Number</b>              | VBP15-004                                                                                                                                                                                                                                                                                                                                                                                                                                                                                                                                                                                                                                                                                                                                                                                                                                                                                                                                                                                                                                                                                                                                                                                                                                                                                                                                                                                  |
| <b>Drug Substance</b>               | delta-1,4,9(11)-pregnatriene-17-alpha,21-dihydroxy-16-alpha-methyl-3,20-dione                                                                                                                                                                                                                                                                                                                                                                                                                                                                                                                                                                                                                                                                                                                                                                                                                                                                                                                                                                                                                                                                                                                                                                                                                                                                                                              |
| <b>Investigational Drug Product</b> | Vamorolone, 1.33% and 4.0% wt/wt suspension for oral dosing                                                                                                                                                                                                                                                                                                                                                                                                                                                                                                                                                                                                                                                                                                                                                                                                                                                                                                                                                                                                                                                                                                                                                                                                                                                                                                                                |
| <b>Phase of Development</b>         | Phase IIb                                                                                                                                                                                                                                                                                                                                                                                                                                                                                                                                                                                                                                                                                                                                                                                                                                                                                                                                                                                                                                                                                                                                                                                                                                                                                                                                                                                  |
| <b>Indication</b>                   | Treatment of Duchenne muscular dystrophy (DMD)                                                                                                                                                                                                                                                                                                                                                                                                                                                                                                                                                                                                                                                                                                                                                                                                                                                                                                                                                                                                                                                                                                                                                                                                                                                                                                                                             |
| <b>Primary Objectives</b>           | <ol style="list-style-type: none"> <li>1. To compare the efficacy of vamorolone administered orally at daily doses of 6.0 mg/kg over a 24-week treatment period vs. placebo in ambulant boys ages 4 to &lt;7 years with DMD; and</li> <li>2. To evaluate the safety and tolerability of vamorolone administered orally at daily doses of 2.0 mg/kg and 6.0 mg/kg in ambulant boys ages 4 to &lt;7 years with DMD.</li> </ol>                                                                                                                                                                                                                                                                                                                                                                                                                                                                                                                                                                                                                                                                                                                                                                                                                                                                                                                                                               |
| <b>Secondary Objectives</b>         | <ol style="list-style-type: none"> <li>1. To compare the efficacy of vamorolone administered orally at daily doses of 2.0 mg/kg over a 24-week treatment period vs. placebo in ambulant boys ages 4 to &lt;7 years with DMD;</li> <li>2. To compare the safety of vamorolone administered orally at daily doses of 2.0 mg/kg and 6.0 mg/kg over a 24-week treatment period vs. daily prednisone 0.75 mg/kg in ambulant boys ages 4 to &lt;7 years with DMD;</li> <li>3. To compare the efficacy of vamorolone administered orally at daily doses of 2.0 mg/kg and 6.0 mg/kg over a 24-week treatment period vs. daily prednisone 0.75 mg/kg in ambulant boys ages 4 to &lt;7 years with DMD;</li> <li>4. To compare the efficacy of vamorolone administered orally at daily doses of 2.0 mg/kg and 6.0 mg/kg over a 48-week treatment period in ambulant boys ages 4 to &lt;7 years with DMD vs. untreated DMD historical controls;</li> <li>5. To compare the safety of vamorolone administered orally at daily doses of 2.0 mg/kg and 6.0 mg/kg over a 48-week treatment period in ambulant boys ages 4 to &lt;7 years with DMD vs. prednisone-treated DMD historical controls; and</li> <li>6. To evaluate the population pharmacokinetics (PK) of vamorolone administered orally at daily doses of 2.0 mg/kg and 6.0 mg/kg in ambulant boys ages 4 to &lt;7 years with DMD.</li> </ol> |
| <b>Exploratory Objectives</b>       | <ol style="list-style-type: none"> <li>1. To evaluate the satisfaction with treatment of vamorolone administered orally at daily doses of 2.0 mg/kg and 6.0 mg/kg over a 24-week treatment period vs. daily prednisone 0.75 mg/kg in ambulant boys ages 4 to &lt;7 years with DMD;</li> <li>2. To evaluate the effect of vamorolone administered orally at daily doses of 2.0 mg/kg and 6.0 mg/kg over a 24-week treatment period vs. daily</li> </ol>                                                                                                                                                                                                                                                                                                                                                                                                                                                                                                                                                                                                                                                                                                                                                                                                                                                                                                                                     |



250  
251

|                            | <p>prednisone 0.75 mg/kg on behavior and neuropsychology;</p> <ol style="list-style-type: none"> <li>3. To evaluate the effect of vamorolone administered orally at daily doses of 2.0 mg/kg and 6.0 mg/kg over a 24-week treatment period vs. placebo on physical functioning;</li> <li>4. To assess the ease of administration of the study medication suspension to ambulant boys ages 4 to &lt;7 years with DMD;</li> <li>5. To compare the effects of vamorolone administered orally at daily doses of 2.0 mg/kg and 6.0 mg/kg over a 24-week treatment period vs. placebo on potential serum pharmacodynamics (PD) biomarkers of safety and efficacy in ambulant boys ages 4 to &lt;7 years with DMD;</li> <li>6. To compare the effects of vamorolone administered orally at daily doses of 2.0 mg/kg and 6.0 mg/kg over a 24-week treatment period vs. daily prednisone 0.75 mg/kg on potential serum PD biomarkers of safety and efficacy in ambulant boys ages 4 to &lt;7 years with DMD; and</li> <li>7. To determine if candidate genetic modifiers of DMD (gene polymorphisms associated with disease severity, or response to glucocorticoid treatment) are similarly associated with vamorolone-treated DMD subjects (baseline disease severity, or response to vamorolone or prednisone treatment).</li> </ol>                                                                                                                                                                                                                                                                                                                                                                                                                                                                                                                                                                                                                                                                                                                                                                                                                                                                                                                                                                                                                                                                                                                                                                                                                                          |                              |                           |                     |                     |   |    |                             |                           |   |    |                             |                           |   |    |                              |                           |   |    |                              |                           |   |    |           |                           |   |    |           |                           |
|----------------------------|-------------------------------------------------------------------------------------------------------------------------------------------------------------------------------------------------------------------------------------------------------------------------------------------------------------------------------------------------------------------------------------------------------------------------------------------------------------------------------------------------------------------------------------------------------------------------------------------------------------------------------------------------------------------------------------------------------------------------------------------------------------------------------------------------------------------------------------------------------------------------------------------------------------------------------------------------------------------------------------------------------------------------------------------------------------------------------------------------------------------------------------------------------------------------------------------------------------------------------------------------------------------------------------------------------------------------------------------------------------------------------------------------------------------------------------------------------------------------------------------------------------------------------------------------------------------------------------------------------------------------------------------------------------------------------------------------------------------------------------------------------------------------------------------------------------------------------------------------------------------------------------------------------------------------------------------------------------------------------------------------------------------------------------------------------------------------------------------------------------------------------------------------------------------------------------------------------------------------------------------------------------------------------------------------------------------------------------------------------------------------------------------------------------------------------------------------------------------------------------------------------------------------------------------------------------------------|------------------------------|---------------------------|---------------------|---------------------|---|----|-----------------------------|---------------------------|---|----|-----------------------------|---------------------------|---|----|------------------------------|---------------------------|---|----|------------------------------|---------------------------|---|----|-----------|---------------------------|---|----|-----------|---------------------------|
| <p><b>Study Design</b></p> | <p>This Phase IIb study is a randomized, double-blind, parallel group, placebo and active-controlled study to evaluate the efficacy, safety, PD, and population PK of vamorolone administered orally at daily doses of 2.0 mg/kg and 6.0 mg/kg versus prednisone 0.75 mg/kg/day and placebo over a Treatment Period of 24 weeks, and to evaluate persistence of effect over a Treatment Period of 48 weeks in ambulant boys ages 4 to &lt;7 years with DMD.</p> <p>The study is comprised of a 5-week Pretreatment Screening Period, a 1-day Pretreatment Baseline Period, a 24-week Treatment Period #1 (Weeks 1-24), a 4-week Transition Period (Weeks 25-28), a 20-week Treatment Period #2 (Weeks 28 + 1 day to 48), and a 4-week Dose-tapering Period (Weeks 49-52).</p> <p>Subjects will be randomized to one of six treatment groups in a 2:2:1:1:1:1 ratio, where the two prednisone groups in Treatment Period #1 (Groups 3 and 4) will be combined and the two placebo groups in Treatment Period #1 (Groups 5 and 6) will be combined, effectively resulting in a 1:1:1:1 randomization (vamorolone 2.0 mg/kg/day : vamorolone 6.0 mg/kg/day : prednisone 0.75 mg/kg/day : placebo) for Treatment Period #1:</p> <p><b>Study Randomization Schedule</b></p> <table border="1" data-bbox="540 1409 1411 1686"> <thead> <tr> <th>Group</th> <th>#</th> <th>Treatment Period #1</th> <th>Treatment Period #2</th> </tr> </thead> <tbody> <tr> <td>1</td> <td>30</td> <td>Vamorolone, 2.0 mg/kg/day →</td> <td>Vamorolone, 2.0 mg/kg/day</td> </tr> <tr> <td>2</td> <td>30</td> <td>Vamorolone, 6.0 mg/kg/day →</td> <td>Vamorolone, 6.0 mg/kg/day</td> </tr> <tr> <td>3</td> <td>15</td> <td>Prednisone, 0.75 mg/kg/day →</td> <td>Vamorolone, 2.0 mg/kg/day</td> </tr> <tr> <td>4</td> <td>15</td> <td>Prednisone, 0.75 mg/kg/day →</td> <td>Vamorolone, 6.0 mg/kg/day</td> </tr> <tr> <td>5</td> <td>15</td> <td>Placebo →</td> <td>Vamorolone, 2.0 mg/kg/day</td> </tr> <tr> <td>6</td> <td>15</td> <td>Placebo →</td> <td>Vamorolone, 6.0 mg/kg/day</td> </tr> </tbody> </table> <p># = number of planned randomized subjects in each group</p> <p>Subjects will be stratified based on age at study entry (&lt;6 vs. ≥ 6 years). During the 4-week Transition Period between Treatment Period #1 and Treatment Period #2, all subjects will continue on the same oral suspension (vamorolone 2.0 mg/kg or 6.0 mg/kg, or matching placebo) they received during Treatment Period #1 and all subjects will have their tablet dose tapered to zero. Thus,</p> | Group                        | #                         | Treatment Period #1 | Treatment Period #2 | 1 | 30 | Vamorolone, 2.0 mg/kg/day → | Vamorolone, 2.0 mg/kg/day | 2 | 30 | Vamorolone, 6.0 mg/kg/day → | Vamorolone, 6.0 mg/kg/day | 3 | 15 | Prednisone, 0.75 mg/kg/day → | Vamorolone, 2.0 mg/kg/day | 4 | 15 | Prednisone, 0.75 mg/kg/day → | Vamorolone, 6.0 mg/kg/day | 5 | 15 | Placebo → | Vamorolone, 2.0 mg/kg/day | 6 | 15 | Placebo → | Vamorolone, 6.0 mg/kg/day |
| Group                      | #                                                                                                                                                                                                                                                                                                                                                                                                                                                                                                                                                                                                                                                                                                                                                                                                                                                                                                                                                                                                                                                                                                                                                                                                                                                                                                                                                                                                                                                                                                                                                                                                                                                                                                                                                                                                                                                                                                                                                                                                                                                                                                                                                                                                                                                                                                                                                                                                                                                                                                                                                                       | Treatment Period #1          | Treatment Period #2       |                     |                     |   |    |                             |                           |   |    |                             |                           |   |    |                              |                           |   |    |                              |                           |   |    |           |                           |   |    |           |                           |
| 1                          | 30                                                                                                                                                                                                                                                                                                                                                                                                                                                                                                                                                                                                                                                                                                                                                                                                                                                                                                                                                                                                                                                                                                                                                                                                                                                                                                                                                                                                                                                                                                                                                                                                                                                                                                                                                                                                                                                                                                                                                                                                                                                                                                                                                                                                                                                                                                                                                                                                                                                                                                                                                                      | Vamorolone, 2.0 mg/kg/day →  | Vamorolone, 2.0 mg/kg/day |                     |                     |   |    |                             |                           |   |    |                             |                           |   |    |                              |                           |   |    |                              |                           |   |    |           |                           |   |    |           |                           |
| 2                          | 30                                                                                                                                                                                                                                                                                                                                                                                                                                                                                                                                                                                                                                                                                                                                                                                                                                                                                                                                                                                                                                                                                                                                                                                                                                                                                                                                                                                                                                                                                                                                                                                                                                                                                                                                                                                                                                                                                                                                                                                                                                                                                                                                                                                                                                                                                                                                                                                                                                                                                                                                                                      | Vamorolone, 6.0 mg/kg/day →  | Vamorolone, 6.0 mg/kg/day |                     |                     |   |    |                             |                           |   |    |                             |                           |   |    |                              |                           |   |    |                              |                           |   |    |           |                           |   |    |           |                           |
| 3                          | 15                                                                                                                                                                                                                                                                                                                                                                                                                                                                                                                                                                                                                                                                                                                                                                                                                                                                                                                                                                                                                                                                                                                                                                                                                                                                                                                                                                                                                                                                                                                                                                                                                                                                                                                                                                                                                                                                                                                                                                                                                                                                                                                                                                                                                                                                                                                                                                                                                                                                                                                                                                      | Prednisone, 0.75 mg/kg/day → | Vamorolone, 2.0 mg/kg/day |                     |                     |   |    |                             |                           |   |    |                             |                           |   |    |                              |                           |   |    |                              |                           |   |    |           |                           |   |    |           |                           |
| 4                          | 15                                                                                                                                                                                                                                                                                                                                                                                                                                                                                                                                                                                                                                                                                                                                                                                                                                                                                                                                                                                                                                                                                                                                                                                                                                                                                                                                                                                                                                                                                                                                                                                                                                                                                                                                                                                                                                                                                                                                                                                                                                                                                                                                                                                                                                                                                                                                                                                                                                                                                                                                                                      | Prednisone, 0.75 mg/kg/day → | Vamorolone, 6.0 mg/kg/day |                     |                     |   |    |                             |                           |   |    |                             |                           |   |    |                              |                           |   |    |                              |                           |   |    |           |                           |   |    |           |                           |
| 5                          | 15                                                                                                                                                                                                                                                                                                                                                                                                                                                                                                                                                                                                                                                                                                                                                                                                                                                                                                                                                                                                                                                                                                                                                                                                                                                                                                                                                                                                                                                                                                                                                                                                                                                                                                                                                                                                                                                                                                                                                                                                                                                                                                                                                                                                                                                                                                                                                                                                                                                                                                                                                                      | Placebo →                    | Vamorolone, 2.0 mg/kg/day |                     |                     |   |    |                             |                           |   |    |                             |                           |   |    |                              |                           |   |    |                              |                           |   |    |           |                           |   |    |           |                           |
| 6                          | 15                                                                                                                                                                                                                                                                                                                                                                                                                                                                                                                                                                                                                                                                                                                                                                                                                                                                                                                                                                                                                                                                                                                                                                                                                                                                                                                                                                                                                                                                                                                                                                                                                                                                                                                                                                                                                                                                                                                                                                                                                                                                                                                                                                                                                                                                                                                                                                                                                                                                                                                                                                      | Placebo →                    | Vamorolone, 6.0 mg/kg/day |                     |                     |   |    |                             |                           |   |    |                             |                           |   |    |                              |                           |   |    |                              |                           |   |    |           |                           |   |    |           |                           |

252  
 253

|                                   |                                                                                                                                                                                                                                                                                                                                                                                                                                                                                                                                                                                                                                                                                                                                                                                                                                                                                                                                                                                                                                                                                                                                                                                                                                                                                                                                                                                                                                                                                                                                                                                                                                                                                                                                                                                                                                                                                                                                                        |
|-----------------------------------|--------------------------------------------------------------------------------------------------------------------------------------------------------------------------------------------------------------------------------------------------------------------------------------------------------------------------------------------------------------------------------------------------------------------------------------------------------------------------------------------------------------------------------------------------------------------------------------------------------------------------------------------------------------------------------------------------------------------------------------------------------------------------------------------------------------------------------------------------------------------------------------------------------------------------------------------------------------------------------------------------------------------------------------------------------------------------------------------------------------------------------------------------------------------------------------------------------------------------------------------------------------------------------------------------------------------------------------------------------------------------------------------------------------------------------------------------------------------------------------------------------------------------------------------------------------------------------------------------------------------------------------------------------------------------------------------------------------------------------------------------------------------------------------------------------------------------------------------------------------------------------------------------------------------------------------------------------|
|                                   | <p>subjects randomized to receive vamorolone during Treatment Period #1 (Groups 1 and 2) will continue to receive vamorolone at the same dose, while subjects randomized to receive prednisone will have their dose tapered to zero, and subjects randomized to placebo will continue to receive placebo.</p> <p>The prednisone group will be used as an active control comparison for safety and efficacy endpoints as requested by the European Medicines Agency (EMA). The placebo group will be used as comparator for efficacy endpoints (superiority model) as requested by the EMA and Food and Drug Administration (FDA) protocol advisory board. Although glucocorticoids are part of the care recommendations for DMD, their adverse effect profile has limited their use. The age at which glucocorticoids should be started in DMD boys is uncertain, ranging from 4 to 7 years, based on a balance between benefits and side effects. In view of the age inclusion criteria and duration of the placebo-controlled study period (6 months), the use of a placebo group has been considered acceptable as in clinical practice it will not cause a real delay in prescription of an accepted treatment for this condition. Any exposure of placebo longer than 6 months was considered unethical.</p> <p>At the end of the Treatment Period #2, subjects may be given access to vamorolone through an additional study or general access program, or given the option to transition to standard of care treatment for DMD (may include glucocorticoids). Subjects completing VBP15-004 and enrolling directly into an additional vamorolone study or general access program to receive vamorolone will not need to taper their vamorolone dose prior to enrollment. All other subjects will begin a 4-week double-blind Dose-tapering Period during which the dose of study medication will be progressively reduced and discontinued.</p> |
| <p><b>Planned Sample Size</b></p> | <p>A total of approximately 120 subjects will be randomized (2:2:1:1:1:1) to treatment as follows (treatment assignment in Treatment Period #1 → treatment assignment in Treatment Period #2):</p> <p>Vamorolone 2.0 mg/kg/day → Vamorolone 2.0 mg/kg/day (n=30);<br/>             Vamorolone 6.0 mg/kg/day → Vamorolone 6.0 mg/kg/day (n=30);<br/>             Prednisone 0.75 mg/kg/day → Vamorolone 2.0 mg/kg/day (n=15);<br/>             Prednisone 0.75 mg/kg/day → Vamorolone 6.0 mg/kg/day (n=15);<br/>             Placebo → Vamorolone 2.0 mg/kg/day (n=15); or<br/>             Placebo → Vamorolone 6.0 mg/kg/day (n=15).</p>                                                                                                                                                                                                                                                                                                                                                                                                                                                                                                                                                                                                                                                                                                                                                                                                                                                                                                                                                                                                                                                                                                                                                                                                                                                                                                              |
| <p><b>Inclusion Criteria</b></p>  | <ol style="list-style-type: none"> <li>1. Subject's parent(s) or legal guardian(s) has (have) provided written informed consent and Health Insurance Portability and Accountability Act (HIPAA) authorization, where applicable, prior to any study-related procedures; participants will be asked to give written or verbal assent according to local requirements</li> <li>2. Subject has a centrally confirmed (by TRiNDS central genetic counselor[s]) diagnosis of DMD as defined as:             <ul style="list-style-type: none"> <li>• Dystrophin immunofluorescence and/or immunoblot showing complete dystrophin deficiency, and clinical picture consistent with typical DMD, OR</li> <li>• Identifiable mutation within the DMD gene (deletion/duplication of one or more exons), where reading frame can be predicted as 'out-of-frame,' and clinical picture consistent with typical DMD, OR</li> <li>• Complete dystrophin gene sequencing showing an alteration (point mutation, duplication, other) that is expected to preclude production of the dystrophin protein (i.e., nonsense mutation, deletion/duplication leading to a downstream stop codon), with a clinical picture consistent</li> </ul> </li> </ol>                                                                                                                                                                                                                                                                                                                                                                                                                                                                                                                                                                                                                                                                                                                  |

254  
 255

|                                  |                                                                                                                                                                                                                                                                                                                                                                                                                                                                                                                                                                                                                                                                                                                                                                                                                                                                                                                                                                                                                                                                                                                                                                                                                                                                                                                                                                                                                                                                                                                                                                                                                                                                                                                                                                                                                                                                                                                            |
|----------------------------------|----------------------------------------------------------------------------------------------------------------------------------------------------------------------------------------------------------------------------------------------------------------------------------------------------------------------------------------------------------------------------------------------------------------------------------------------------------------------------------------------------------------------------------------------------------------------------------------------------------------------------------------------------------------------------------------------------------------------------------------------------------------------------------------------------------------------------------------------------------------------------------------------------------------------------------------------------------------------------------------------------------------------------------------------------------------------------------------------------------------------------------------------------------------------------------------------------------------------------------------------------------------------------------------------------------------------------------------------------------------------------------------------------------------------------------------------------------------------------------------------------------------------------------------------------------------------------------------------------------------------------------------------------------------------------------------------------------------------------------------------------------------------------------------------------------------------------------------------------------------------------------------------------------------------------|
|                                  | <p>with typical DMD;</p> <ol style="list-style-type: none"> <li>3. Subject is <math>\geq 4</math> years and <math>&lt;7</math> years of age at time of enrollment in the study;</li> <li>4. Subject weighs <math>&gt;13.0</math> kg and <math>\leq 39.9</math> kg at the Screening Visit;</li> <li>5. Subject is able to walk independently without assistive devices;</li> <li>6. Subject is able to complete the Time to Stand Test (TTSTAND) without assistance in <math>&lt;10</math> seconds, as assessed at the Screening Visit;</li> <li>7. Clinical laboratory test results are within the normal range at the Screening Visit, or if abnormal, are not clinically significant, in the opinion of the Investigator. [Notes: Serum gamma glutamyl transferase (GGT), creatinine, and total bilirubin all must be <math>\leq</math> upper limit of the normal range at the Screening Visit. An abnormal vitamin D level that is considered clinically significant will not exclude a subject from randomization];</li> <li>8. Subject has evidence of chicken pox immunity as determined by:             <ul style="list-style-type: none"> <li>• Presence of IgG antibodies to varicella, as documented by a positive test result from the local laboratory from blood collected during the Screening Period, OR</li> <li>• Documentation, provided at the Screening Visit, that the subject has had 2 doses of varicella vaccine, with or without serologic evidence of immunity; the second of the 2 immunizations must have been given at least 14 days prior to randomization.</li> </ul> </li> <li>9. Subject is able to swallow tablets, as confirmed by successful test swallowing of placebo tablets during the Screening Period; and</li> <li>10. Subject and parent(s)/guardian(s) are willing and able to comply with scheduled visits, study drug administration plan, and study procedures.</li> </ol> |
| <p><b>Exclusion Criteria</b></p> | <ol style="list-style-type: none"> <li>1. Subject has current or history of major renal or hepatic impairment, diabetes mellitus or immunosuppression;</li> <li>2. Subject has current or history of chronic systemic fungal or viral infections;</li> <li>3. Subject has had an acute illness within 4 weeks prior to the first dose of study medication;</li> <li>4. Subject has used mineralocorticoid receptor agents, such as spironolactone, eplerenone, canrenone (canrenoate potassium), prorenone (prorenoate potassium), mexrenone (mexrenoate potassium) within 4 weeks prior to the first dose of study medication;</li> <li>5. Subject has a history of primary hyperaldosteronism;</li> <li>6. Subject has evidence of symptomatic cardiomyopathy [Note: Asymptomatic cardiac abnormality on investigation would not be exclusionary];</li> <li>7. Subject is currently being treated or has received previous treatment with oral glucocorticoids or other immunosuppressive agents [Notes: Past transient use of oral glucocorticoids or other oral immunosuppressive agents for no longer than 1 month cumulative, with last use at least 3 months prior to first dose of study medication, will be considered for eligibility on a case-by-case basis, unless discontinued for intolerance. Inhaled and/or topical glucocorticoids are permitted if last use is at least 4 weeks prior to first dose of study medication or if administered at stable dose beginning at least 4 weeks prior to first dose of study medication and anticipated to be used at the stable dose regimen for the duration of the study];</li> <li>8. Subject has an allergy or hypersensitivity to the study medication or to any of its constituents;</li> <li>9. Subject has used idebenone within 4 weeks prior to the first dose of study</li> </ol>                                                                      |

256  
 257

|                                          |                                                                                                                                                                                                                                                                                                                                                                                                                                                                                                                                                                                                                                                                                                                                                                                                                                                                                                                                                                                                                                                                                                                                                                                                                                                                                                                                                                                                                                                                                                                                                                                                                                                                                                                                                                                                                                                                                                                                                                                                 |
|------------------------------------------|-------------------------------------------------------------------------------------------------------------------------------------------------------------------------------------------------------------------------------------------------------------------------------------------------------------------------------------------------------------------------------------------------------------------------------------------------------------------------------------------------------------------------------------------------------------------------------------------------------------------------------------------------------------------------------------------------------------------------------------------------------------------------------------------------------------------------------------------------------------------------------------------------------------------------------------------------------------------------------------------------------------------------------------------------------------------------------------------------------------------------------------------------------------------------------------------------------------------------------------------------------------------------------------------------------------------------------------------------------------------------------------------------------------------------------------------------------------------------------------------------------------------------------------------------------------------------------------------------------------------------------------------------------------------------------------------------------------------------------------------------------------------------------------------------------------------------------------------------------------------------------------------------------------------------------------------------------------------------------------------------|
|                                          | <p>medication;</p> <ol style="list-style-type: none"> <li>10. Subject has severe behavioral or cognitive problems that preclude participation in the study, in the opinion of the Investigator;</li> <li>11. Subject has previous or ongoing medical condition, medical history, physical findings or laboratory abnormalities that could affect safety, make it unlikely that treatment and follow-up will be correctly completed or impair the assessment of study results, in the opinion of the Investigator;</li> <li>12. Subject is taking (or has taken within 4 weeks prior to the first dose of study medication) herbal remedies and supplements which can impact muscle strength and function (e.g., Co-enzyme Q10, creatine, etc);</li> <li>13. Subject is taking (or has taken within 3 months prior to the first dose of study medication) any medication indicated for DMD, including Exondys51 and Translarna;</li> <li>14. Subject has been administered a live attenuated vaccine within 14 days prior to the first dose of study medication;</li> <li>15. Subject is currently taking any other investigational drug or has taken any other investigational drug within 3 months prior to the first dose of study medication;</li> <li>16. Subject has a sibling who is currently enrolled in any vamorolone study or Expanded Access Program, or who intends to enroll in any vamorolone study or Expanded Access Program during the subject's participation in the VBP15-004 study; or</li> <li>17. Subject has previously been enrolled in the study.</li> </ol> <p>Note: Any parameter/test may be repeated at the Investigator's discretion during Screening to determine reproducibility. In addition, subjects may be rescreened if ineligible due to a transient condition which would prevent the subject from participating, such as an upper respiratory tract infection or injury, or if ineligible due to negative anti-varicella IgG antibody test result.</p> |
| <b>Number of Centers</b>                 | The study will be conducted at approximately 30 study sites in approximately 15 countries, predominantly in the European Union (EU).                                                                                                                                                                                                                                                                                                                                                                                                                                                                                                                                                                                                                                                                                                                                                                                                                                                                                                                                                                                                                                                                                                                                                                                                                                                                                                                                                                                                                                                                                                                                                                                                                                                                                                                                                                                                                                                            |
| <b>Study Period</b>                      | First subject screened: 1Q 2018<br>Last subject last visit: 2Q 2020                                                                                                                                                                                                                                                                                                                                                                                                                                                                                                                                                                                                                                                                                                                                                                                                                                                                                                                                                                                                                                                                                                                                                                                                                                                                                                                                                                                                                                                                                                                                                                                                                                                                                                                                                                                                                                                                                                                             |
| <b>Study Duration</b>                    | Up to approximately 36 months total duration                                                                                                                                                                                                                                                                                                                                                                                                                                                                                                                                                                                                                                                                                                                                                                                                                                                                                                                                                                                                                                                                                                                                                                                                                                                                                                                                                                                                                                                                                                                                                                                                                                                                                                                                                                                                                                                                                                                                                    |
| <b>Individual Subject Study Duration</b> | <p>Up to approximately 57 weeks:</p> <ul style="list-style-type: none"> <li>• Screening Period: up to 5 weeks</li> <li>• Treatment Period #1: 24 weeks</li> <li>• Transition Period: 4 weeks</li> <li>• Treatment Period #2: 20 weeks</li> <li>• Dose-tapering Period: 4 weeks (only for subjects who will transition off vamorolone at the end of the study)</li> </ul> <p>Subjects who complete the Treatment Period Week 48 assessments may be given the option of continuing vamorolone treatment in an additional vamorolone study or general access program under separate protocol. Subjects who continue directly with vamorolone treatment in the additional vamorolone study or general access program will be discharged from the VBP15-004 study following completion of all Week 48 assessments and the Week 48 Follow-up Visit ACTH Stimulation Test, and will not participate in the Dose-tapering Period.</p>                                                                                                                                                                                                                                                                                                                                                                                                                                                                                                                                                                                                                                                                                                                                                                                                                                                                                                                                                                                                                                                                   |

258  
 259  
 260  
 261  
 262  
 263  
 264

| <p>265<br/>                 266<br/>                 267<br/>                 268<br/>                 269<br/>                 270<br/>                 271<br/>                 272<br/>                 273<br/>                 274<br/>                 275<br/>                 276<br/>                 277<br/>                 278<br/>                 279<br/>                 280<br/> <br/>                 281<br/>                 282<br/>                 283<br/>                 284<br/>                 285<br/>                 286<br/>                 287<br/>                 288<br/>                 289<br/> <br/>                 290<br/>                 291<br/>                 292<br/>                 293<br/> <br/>                 294<br/>                 295<br/>                 296<br/>                 297<br/>                 298<br/>                 299<br/> <br/>                 300<br/>                 301<br/>                 302<br/>                 303<br/>                 304<br/>                 305<br/>                 306</p> | <p><b>Study Drug Formulation Dosage &amp; Administration</b></p> <p><b>Treatment Period #1</b><br/>                 Vamorolone 1.33% and vamorolone 4.0% wt/wt oral suspensions (investigational medicine), prednisone (active-control) or placebo will be administered once daily over the 24-week Treatment Period #1. Subjects receiving 2.0 mg/kg/day will be administered the vamorolone 1.33% wt/wt oral suspension, and subjects receiving 6.0 mg/kg/day will be administered the vamorolone 4.0% wt/wt oral suspension. To maintain the blind, matched suspension (vamorolone or placebo) and matched tablets (prednisone or placebo) will be administered. Each subject will receive a dose of suspension (vamorolone or placebo) and tablets (prednisone or placebo) each day. The number of tablets of prednisone 5 mg or matching placebo to be administered, based on subject weight and a prednisone dose of 0.75 mg/kg, is shown in the table below:</p> <p><b>Prednisone and Placebo Tablet Dosing</b></p> <table border="1"> <thead> <tr> <th>Band</th> <th>Weight range in kg</th> <th>Weight used for calculation of dose per kg</th> <th>Dose in mg based on 0.75 mg/kg prednisone</th> <th>Number tablets of prednisone (5 mg) or matching placebo for given weight range</th> </tr> </thead> <tbody> <tr> <td>A</td> <td>13-19.9</td> <td>13.33 kg</td> <td>10 mg</td> <td>2</td> </tr> <tr> <td>B</td> <td>20-25.9</td> <td>20.00 kg</td> <td>15 mg</td> <td>3</td> </tr> <tr> <td>C</td> <td>26-32.9</td> <td>26.67 kg</td> <td>20 mg</td> <td>4</td> </tr> <tr> <td>D</td> <td>33-39.9</td> <td>33.33 kg</td> <td>25 mg</td> <td>5</td> </tr> </tbody> </table> <p>Study drugs will be administered in the study unit on Day 1, and at the Week 2, Week 12 and Week 24 study visits; all other doses will be administered at home. Study drug oral suspensions will be administered by mouth using a volumetric syringe. Following administration of the dose of study drug suspension, the syringe will be filled once with water and the water will be administered by mouth using the volumetric syringe. Prednisone or matching placebo tablets will be taken either immediately before or immediately after the dose of suspension. The subject will then drink approximately 50 mL (approximately 2 ounces) of water to ensure the full dose has been ingested.</p> <p>The daily dose of study medication should be taken with breakfast including at least 8 g of fat (approximately 8 ounces [240 mL] of full-fat milk or equivalent high-fat food portion). There are no other food or drink restrictions before or after dosing.</p> <p><b>Transition Period</b><br/>                 Vamorolone 1.33% wt/wt or 4.0% wt/wt (investigational medicine) or placebo oral suspension will continue to be administered once daily over the 4-week Transition Period. Prednisone (active control) and placebo tablets will be tapered over the 4-week Transition Period. All study medication will be administered once daily, in the same manner as during Treatment Period #1.</p> <p><b>Treatment Period #2 and Dose-tapering Period</b><br/>                 Vamorolone 1.33% wt/wt or 4.0% wt/wt oral suspension (investigational medicine) will be administered once daily over the 20-week Treatment Period #2, and during the 4-week Dose-tapering Period, as applicable. No study drug tablets are administered during Treatment Period #2 or the Dose-tapering Period. The oral suspension study medication will be administered once daily, in the same manner as during Treatment Period #1.</p> | Band                                       | Weight range in kg                        | Weight used for calculation of dose per kg                                     | Dose in mg based on 0.75 mg/kg prednisone | Number tablets of prednisone (5 mg) or matching placebo for given weight range | A | 13-19.9 | 13.33 kg | 10 mg | 2 | B | 20-25.9 | 20.00 kg | 15 mg | 3 | C | 26-32.9 | 26.67 kg | 20 mg | 4 | D | 33-39.9 | 33.33 kg | 25 mg | 5 |
|-----------------------------------------------------------------------------------------------------------------------------------------------------------------------------------------------------------------------------------------------------------------------------------------------------------------------------------------------------------------------------------------------------------------------------------------------------------------------------------------------------------------------------------------------------------------------------------------------------------------------------------------------------------------------------------------------------------------------------------------------------------------------------------------------------------------------------------------------------------------------------------------------------------------------------------------------------------------------------------------------------------------------------------------------------------------------------------------------------|-------------------------------------------------------------------------------------------------------------------------------------------------------------------------------------------------------------------------------------------------------------------------------------------------------------------------------------------------------------------------------------------------------------------------------------------------------------------------------------------------------------------------------------------------------------------------------------------------------------------------------------------------------------------------------------------------------------------------------------------------------------------------------------------------------------------------------------------------------------------------------------------------------------------------------------------------------------------------------------------------------------------------------------------------------------------------------------------------------------------------------------------------------------------------------------------------------------------------------------------------------------------------------------------------------------------------------------------------------------------------------------------------------------------------------------------------------------------------------------------------------------------------------------------------------------------------------------------------------------------------------------------------------------------------------------------------------------------------------------------------------------------------------------------------------------------------------------------------------------------------------------------------------------------------------------------------------------------------------------------------------------------------------------------------------------------------------------------------------------------------------------------------------------------------------------------------------------------------------------------------------------------------------------------------------------------------------------------------------------------------------------------------------------------------------------------------------------------------------------------------------------------------------------------------------------------------------------------------------------------------------------------------------------------------------------------------------------------------------------------------------------------------------------------------------------------------------------------------------------------------------------------------------------------------------------------------------------------------------------------------------------------------------------------------------------------------------------------------------------------------------------------------------------------------------------------------------------------------------------------------------------------------------------------------------------------------------------------------------------------------------------------------------------------------------------------------------------------------------------------------------------------------------------------------------------------------------------------------------------------------------------------|--------------------------------------------|-------------------------------------------|--------------------------------------------------------------------------------|-------------------------------------------|--------------------------------------------------------------------------------|---|---------|----------|-------|---|---|---------|----------|-------|---|---|---------|----------|-------|---|---|---------|----------|-------|---|
| Band                                                                                                                                                                                                                                                                                                                                                                                                                                                                                                                                                                                                                                                                                                                                                                                                                                                                                                                                                                                                                                                                                                | Weight range in kg                                                                                                                                                                                                                                                                                                                                                                                                                                                                                                                                                                                                                                                                                                                                                                                                                                                                                                                                                                                                                                                                                                                                                                                                                                                                                                                                                                                                                                                                                                                                                                                                                                                                                                                                                                                                                                                                                                                                                                                                                                                                                                                                                                                                                                                                                                                                                                                                                                                                                                                                                                                                                                                                                                                                                                                                                                                                                                                                                                                                                                                                                                                                                                                                                                                                                                                                                                                                                                                                                                                                                                                                                        | Weight used for calculation of dose per kg | Dose in mg based on 0.75 mg/kg prednisone | Number tablets of prednisone (5 mg) or matching placebo for given weight range |                                           |                                                                                |   |         |          |       |   |   |         |          |       |   |   |         |          |       |   |   |         |          |       |   |
| A                                                                                                                                                                                                                                                                                                                                                                                                                                                                                                                                                                                                                                                                                                                                                                                                                                                                                                                                                                                                                                                                                                   | 13-19.9                                                                                                                                                                                                                                                                                                                                                                                                                                                                                                                                                                                                                                                                                                                                                                                                                                                                                                                                                                                                                                                                                                                                                                                                                                                                                                                                                                                                                                                                                                                                                                                                                                                                                                                                                                                                                                                                                                                                                                                                                                                                                                                                                                                                                                                                                                                                                                                                                                                                                                                                                                                                                                                                                                                                                                                                                                                                                                                                                                                                                                                                                                                                                                                                                                                                                                                                                                                                                                                                                                                                                                                                                                   | 13.33 kg                                   | 10 mg                                     | 2                                                                              |                                           |                                                                                |   |         |          |       |   |   |         |          |       |   |   |         |          |       |   |   |         |          |       |   |
| B                                                                                                                                                                                                                                                                                                                                                                                                                                                                                                                                                                                                                                                                                                                                                                                                                                                                                                                                                                                                                                                                                                   | 20-25.9                                                                                                                                                                                                                                                                                                                                                                                                                                                                                                                                                                                                                                                                                                                                                                                                                                                                                                                                                                                                                                                                                                                                                                                                                                                                                                                                                                                                                                                                                                                                                                                                                                                                                                                                                                                                                                                                                                                                                                                                                                                                                                                                                                                                                                                                                                                                                                                                                                                                                                                                                                                                                                                                                                                                                                                                                                                                                                                                                                                                                                                                                                                                                                                                                                                                                                                                                                                                                                                                                                                                                                                                                                   | 20.00 kg                                   | 15 mg                                     | 3                                                                              |                                           |                                                                                |   |         |          |       |   |   |         |          |       |   |   |         |          |       |   |   |         |          |       |   |
| C                                                                                                                                                                                                                                                                                                                                                                                                                                                                                                                                                                                                                                                                                                                                                                                                                                                                                                                                                                                                                                                                                                   | 26-32.9                                                                                                                                                                                                                                                                                                                                                                                                                                                                                                                                                                                                                                                                                                                                                                                                                                                                                                                                                                                                                                                                                                                                                                                                                                                                                                                                                                                                                                                                                                                                                                                                                                                                                                                                                                                                                                                                                                                                                                                                                                                                                                                                                                                                                                                                                                                                                                                                                                                                                                                                                                                                                                                                                                                                                                                                                                                                                                                                                                                                                                                                                                                                                                                                                                                                                                                                                                                                                                                                                                                                                                                                                                   | 26.67 kg                                   | 20 mg                                     | 4                                                                              |                                           |                                                                                |   |         |          |       |   |   |         |          |       |   |   |         |          |       |   |   |         |          |       |   |
| D                                                                                                                                                                                                                                                                                                                                                                                                                                                                                                                                                                                                                                                                                                                                                                                                                                                                                                                                                                                                                                                                                                   | 33-39.9                                                                                                                                                                                                                                                                                                                                                                                                                                                                                                                                                                                                                                                                                                                                                                                                                                                                                                                                                                                                                                                                                                                                                                                                                                                                                                                                                                                                                                                                                                                                                                                                                                                                                                                                                                                                                                                                                                                                                                                                                                                                                                                                                                                                                                                                                                                                                                                                                                                                                                                                                                                                                                                                                                                                                                                                                                                                                                                                                                                                                                                                                                                                                                                                                                                                                                                                                                                                                                                                                                                                                                                                                                   | 33.33 kg                                   | 25 mg                                     | 5                                                                              |                                           |                                                                                |   |         |          |       |   |   |         |          |       |   |   |         |          |       |   |   |         |          |       |   |

307  
308

|                      |                                                                                                                                                                                                                                                                                                                                                                                                                                                                                                                                                                                                                                                                                                                                                                                                                                                                                                                                                                                                                                                                                                                                                                                                                                                                                                                                                                                                                                                                                                                                                                                                                                                                                                                                                                                                                                                                                                                                                                                                                                                                                                                                                                                                                                                                                                                                                                                                                                                                                                                                                                                                                                                                                                                                                                                                                                                                                                                                                                                                                                                                                                                                                                                                                                                                                                                                                                                                                                                                                                                                                                                                                                                                                                                                                                                                                                                                                                                                                                                                                                                                                                                                 |
|----------------------|---------------------------------------------------------------------------------------------------------------------------------------------------------------------------------------------------------------------------------------------------------------------------------------------------------------------------------------------------------------------------------------------------------------------------------------------------------------------------------------------------------------------------------------------------------------------------------------------------------------------------------------------------------------------------------------------------------------------------------------------------------------------------------------------------------------------------------------------------------------------------------------------------------------------------------------------------------------------------------------------------------------------------------------------------------------------------------------------------------------------------------------------------------------------------------------------------------------------------------------------------------------------------------------------------------------------------------------------------------------------------------------------------------------------------------------------------------------------------------------------------------------------------------------------------------------------------------------------------------------------------------------------------------------------------------------------------------------------------------------------------------------------------------------------------------------------------------------------------------------------------------------------------------------------------------------------------------------------------------------------------------------------------------------------------------------------------------------------------------------------------------------------------------------------------------------------------------------------------------------------------------------------------------------------------------------------------------------------------------------------------------------------------------------------------------------------------------------------------------------------------------------------------------------------------------------------------------------------------------------------------------------------------------------------------------------------------------------------------------------------------------------------------------------------------------------------------------------------------------------------------------------------------------------------------------------------------------------------------------------------------------------------------------------------------------------------------------------------------------------------------------------------------------------------------------------------------------------------------------------------------------------------------------------------------------------------------------------------------------------------------------------------------------------------------------------------------------------------------------------------------------------------------------------------------------------------------------------------------------------------------------------------------------------------------------------------------------------------------------------------------------------------------------------------------------------------------------------------------------------------------------------------------------------------------------------------------------------------------------------------------------------------------------------------------------------------------------------------------------------------------------|
| <b>Study Summary</b> | <p>This Phase IIb study is a randomized, double-blind, parallel group, placebo- and active-controlled study with double-blind extension to evaluate the long-term efficacy, safety, tolerability, PD, and population PK of vamorolone (the investigational medicine) compared to prednisone (active control) and placebo over a Treatment Period of 24 weeks in boys ages 4 to &lt;7 years with DMD, and determine the persistence of effect over a total Treatment Period of 48 weeks.</p> <p>Study drug dosing will occur from Day 1 until the Week 48 Visit. Study drug dosing will occur at home on all days except the Day 1, Week 2, Week 12, Week 24, Week 28, Week 30, Week 40, and Week 48 study visits, when dosing will occur at the study site.</p> <p>Subjects will be assessed for safety and tolerability, clinical efficacy, PD, and population PK at scheduled visits throughout the study. Treatment Period #1, Transition Period, and Treatment Period #2 study visits will occur at Day 1, Week 2, Week 6, Week 12, Week 18, Week 24, Week 28, Week 30, Week 34, Week 40 and Week 48; all subjects will return to the clinical site for a Week 24 Follow-up Visit and for a Week 48 Follow-up Visit, 48 ± 3 hours after administration of the final dose of Treatment Period #1 and Treatment Period #2 study medication, respectively, for ACTH Stimulation testing. Adverse events, including SAEs, and concomitant medications will be recorded throughout the study.</p> <p>Subject diaries will be dispensed at the Day 1 Visit and at each study visit thereafter through Week 48 to record AEs, changes to concomitant medications taken during the study, and any missed or incomplete doses of study medication.</p> <p>There is flexibility in the timing of completion of some of the scheduled Week 24 and Week 48 assessments. The scheduled physical examination, weight, vital signs, clinical laboratory tests, blood draws for PD biomarker analysis, blood draw for DNA testing (Week 24 only), Ease of Study Medication Administration Assessment, PODCI, PARS III, and functional assessments (TTSTAND, TTCLIMB, TTRW, NSAA, 6MWT, hand-held myometry, ROM) must all be performed on the date of the Week 24 or Week 48 dose of study medication. The 12-lead ECG may be performed on the date of the Week 24 or Week 48 dose of study medication, the day following the Week 24 or Week 48 dose of study medication, or the day of the Week 24 or Week 48 Follow-up Visit. For the Week 24 assessments, completion of the DXA scan, spine X-rays, Fracture Questionnaire, 2-D echocardiography, eye examination, TSQM, and Blindedness Assessment may be performed up to 7 days following the date of the Week 24 dose of study medication to accommodate need for additional scheduling flexibility. For the Week 48 assessments, completion of the DXA scan, Fracture Questionnaire, 2-D echocardiography, eye examination, and TSQM may be performed on the date of the final Week 48 dose of study medication, the day following the Week 48 dose of study medication, or the day of the Week 48 Follow-up Visit for subjects who will receive additional vamorolone therapy by enrolling directly into an additional vamorolone study or general access program, or up to 7 days following the date of the final Week 48 dose of study medication for subjects participating in the Dose-tapering Period.</p> <p>A Transition Period of 4 weeks in duration follows the end of Treatment Period #1 for all subjects. During this Transition Period, all subjects will continue to receive the liquid formulation (vamorolone 2.0 mg/kg or 6.0 mg/kg, or matching placebo) they received during Treatment Period #1 and will be tapered off their study medication tablets (prednisone or matching placebo). Site study staff will contact the parent(s)/guardian(s) by telephone at Week 26 to ensure that the tablet tapering is proceeding according to protocol, to assess potential signs or symptoms indicative of adrenal suppression, and to address any questions the</p> |
|----------------------|---------------------------------------------------------------------------------------------------------------------------------------------------------------------------------------------------------------------------------------------------------------------------------------------------------------------------------------------------------------------------------------------------------------------------------------------------------------------------------------------------------------------------------------------------------------------------------------------------------------------------------------------------------------------------------------------------------------------------------------------------------------------------------------------------------------------------------------------------------------------------------------------------------------------------------------------------------------------------------------------------------------------------------------------------------------------------------------------------------------------------------------------------------------------------------------------------------------------------------------------------------------------------------------------------------------------------------------------------------------------------------------------------------------------------------------------------------------------------------------------------------------------------------------------------------------------------------------------------------------------------------------------------------------------------------------------------------------------------------------------------------------------------------------------------------------------------------------------------------------------------------------------------------------------------------------------------------------------------------------------------------------------------------------------------------------------------------------------------------------------------------------------------------------------------------------------------------------------------------------------------------------------------------------------------------------------------------------------------------------------------------------------------------------------------------------------------------------------------------------------------------------------------------------------------------------------------------------------------------------------------------------------------------------------------------------------------------------------------------------------------------------------------------------------------------------------------------------------------------------------------------------------------------------------------------------------------------------------------------------------------------------------------------------------------------------------------------------------------------------------------------------------------------------------------------------------------------------------------------------------------------------------------------------------------------------------------------------------------------------------------------------------------------------------------------------------------------------------------------------------------------------------------------------------------------------------------------------------------------------------------------------------------------------------------------------------------------------------------------------------------------------------------------------------------------------------------------------------------------------------------------------------------------------------------------------------------------------------------------------------------------------------------------------------------------------------------------------------------------------------------------|

309  
 310

|                               |                                                                                                                                                                                                                                                                                                                                                                                                                                                                                                                                                                                                                                                                                                                                                                                                                                                                                                                                                                                                                                                                                                                                                                                                                                                                                                                                                                                                                                                                                                                                                                                                                                                                                                                                                                                                                                                                                                                                                                                                                                                                                                                                                                                                                                                                                                                                                                                                                                                                                                                                                                                                                                                                                                                                                                                                                                                                                                         |
|-------------------------------|---------------------------------------------------------------------------------------------------------------------------------------------------------------------------------------------------------------------------------------------------------------------------------------------------------------------------------------------------------------------------------------------------------------------------------------------------------------------------------------------------------------------------------------------------------------------------------------------------------------------------------------------------------------------------------------------------------------------------------------------------------------------------------------------------------------------------------------------------------------------------------------------------------------------------------------------------------------------------------------------------------------------------------------------------------------------------------------------------------------------------------------------------------------------------------------------------------------------------------------------------------------------------------------------------------------------------------------------------------------------------------------------------------------------------------------------------------------------------------------------------------------------------------------------------------------------------------------------------------------------------------------------------------------------------------------------------------------------------------------------------------------------------------------------------------------------------------------------------------------------------------------------------------------------------------------------------------------------------------------------------------------------------------------------------------------------------------------------------------------------------------------------------------------------------------------------------------------------------------------------------------------------------------------------------------------------------------------------------------------------------------------------------------------------------------------------------------------------------------------------------------------------------------------------------------------------------------------------------------------------------------------------------------------------------------------------------------------------------------------------------------------------------------------------------------------------------------------------------------------------------------------------------------|
|                               | <p>parent(s)/guardian(s) may have. All subjects will return to the clinical site for the Week 28 assessments, prior to receiving their first dose of Treatment Period #2 study medication on the day after the Week 28 Visit (Week 28 + 1 day).</p> <p>Subjects who complete the VBP15-004 study assessments through the Week 48 Visit and Week 48 Follow-up Visit may be given access to vamorolone through an additional study or general access program, or given the option to transition to standard of care treatment (including glucocorticoids) for DMD. Standard of care treatment for DMD may be offered to the subject following completion of the Phase IIb VBP15-004 study, if the subject's parent or guardian does not wish to enroll the subject in the additional vamorolone study or general access program and/or the Investigator feels it to be in the best interest of the subject.</p> <p>Subjects who complete the VBP15-004 study and will enroll directly into an additional vamorolone study or general access program to continue vamorolone treatment will be discharged from the VBP15-004 study following completion of all Week 48 assessments and the Week 48 Follow-up Visit ACTH Stimulation Test. Subjects who will not continue vamorolone treatment in an additional vamorolone study or general access program, including those subjects who will transition to standard of care treatment for DMD, will have their vamorolone dose tapered during a 4-week Dose-tapering Period, prior to discharge from the study. Site study staff will contact the parent(s)/guardian(s) by telephone at Week 50 to ensure that the dose tapering is proceeding according to protocol, to assess potential signs or symptoms of adrenal suppression, and to address any questions the parent(s)/guardian(s) may have.</p> <p>In the event that any clinical or laboratory parameters remain abnormal at the time of discharge from the study, the subject will be followed medically, as clinically indicated.</p> <p>Any subject who discontinues the study prior to the Week 24 Visit should return to the study unit for scheduled Week 24 assessments and the Week 24 Follow-up Visit ACTH Stimulation Test at the time of early withdrawal, whenever possible; any subject who prematurely discontinues the study after Week 24 but prior to Week 28 should complete the scheduled Week 28 assessments at the time of early withdrawal, whenever possible; and any subject who prematurely discontinues the study after Week 28 but prior to Week 48 should complete the scheduled Week 48 assessments and the Week 48 Follow-up Visit ACTH Stimulation Test at the time of early withdrawal, whenever possible, assuming the subject has not withdrawn consent. Any subject who withdraws early from the study should undergo Early Discontinuation Dose-tapering.</p> |
| <p><b>Safety Measures</b></p> | <ul style="list-style-type: none"> <li>• Body Mass Index (BMI)</li> <li>• Weight and Height</li> <li>• Vital signs (sitting blood pressure, heart rate, respiratory rate, and body temperature [modality for determining temperature should be consistent for each subject at all assessment time points throughout the study])</li> <li>• Physical examination</li> <li>• Cushingoid features</li> <li>• Clinical laboratory tests:             <ul style="list-style-type: none"> <li>• Hematology and clinical chemistry</li> <li>• Urinalysis</li> <li>• Lipid profile (triglycerides, total cholesterol, low density lipoprotein [LDL], high density lipoprotein [HDL])</li> <li>• Vitamin D level</li> </ul> </li> </ul>                                                                                                                                                                                                                                                                                                                                                                                                                                                                                                                                                                                                                                                                                                                                                                                                                                                                                                                                                                                                                                                                                                                                                                                                                                                                                                                                                                                                                                                                                                                                                                                                                                                                                                                                                                                                                                                                                                                                                                                                                                                                                                                                                                          |

311  
312

|                                   |                                                                                                                                                                                                                                                                                                                                                                                                                                                                                                                                                                                                                                                                                                                                                                                                                                                                                                                                                                                                                                                                                                                                                               |
|-----------------------------------|---------------------------------------------------------------------------------------------------------------------------------------------------------------------------------------------------------------------------------------------------------------------------------------------------------------------------------------------------------------------------------------------------------------------------------------------------------------------------------------------------------------------------------------------------------------------------------------------------------------------------------------------------------------------------------------------------------------------------------------------------------------------------------------------------------------------------------------------------------------------------------------------------------------------------------------------------------------------------------------------------------------------------------------------------------------------------------------------------------------------------------------------------------------|
|                                   | <ul style="list-style-type: none"> <li>• ACTH Stimulation Test</li> <li>• 12-lead electrocardiogram (ECG)</li> <li>• 2-D echocardiography</li> <li>• Eye examination</li> <li>• Dual-energy x-ray absorptiometry (DXA) scan</li> <li>• Spine X-ray</li> <li>• Fracture Questionnaire</li> <li>• Clinical signs and symptoms (AEs and SAEs) <ul style="list-style-type: none"> <li>• Grading of clinical and clinical laboratory AEs will be according to the Common Terminology Criteria for Adverse Events (CTCAE), v.4.03</li> </ul> </li> </ul>                                                                                                                                                                                                                                                                                                                                                                                                                                                                                                                                                                                                            |
| <b>Pharmacodynamic Measures</b>   | <ul style="list-style-type: none"> <li>• Blood will be collected for serum PD biomarker testing to explore effects of vamorolone on biomarkers of muscle cellular pathology, and biomarkers associated with acute and chronic glucocorticoid treatment (aspects of both safety and efficacy). Secondary outcomes are serum biomarkers bridged to clinical outcomes of safety, including adrenal suppression, insulin resistance, and bone turnover. Exploratory outcomes are serum biomarkers that have been shown to be glucocorticoid-responsive in DMD patients, but not yet bridged to clinical outcomes (safety and efficacy). Samples for analysis of acute and chronic PD biomarker response will be collected at Day 1, Week 12, and Week 24, Week 28, Week 40, and Week 48 (pre-dose), and final Dose-tapering Period Visit. Blood remaining from collected samples may be stored for future exploratory biomarker studies. Blood samples for PD biomarkers, including insulin and glucose, will be collected after subjects have fasted for <math>\geq 6</math> hours, and prior to the daily dose of study medication where applicable.</li> </ul> |
| <b>Pharmacokinetic Measures</b>   | <ul style="list-style-type: none"> <li>• Blood will be collected from all subjects at the Week 30 Visit, at 2 hours post-dose, for vamorolone population PK analysis.</li> </ul>                                                                                                                                                                                                                                                                                                                                                                                                                                                                                                                                                                                                                                                                                                                                                                                                                                                                                                                                                                              |
| <b>Clinical Efficacy Measures</b> | <ul style="list-style-type: none"> <li>• Time to Stand Test (TTSTAND)</li> <li>• Time to Climb 4 steps (TTCLIMB)</li> <li>• Time to Run/Walk 10 meters Test (TTRW)</li> <li>• North Star Ambulatory Assessment (NSAA)</li> <li>• Six-minute Walk Test (6MWT)</li> <li>• Hand-held Myometry (elbow flexors/knee extensors)</li> <li>• Range of Motion (ROM) in the ankles</li> </ul>                                                                                                                                                                                                                                                                                                                                                                                                                                                                                                                                                                                                                                                                                                                                                                           |
| <b>Exploratory Measures</b>       | <ul style="list-style-type: none"> <li>• Treatment satisfaction questionnaire (TSQM)</li> <li>• Pediatric Outcome Data Collection Instrument (PODCI)</li> <li>• PARS III questionnaire</li> <li>• Ease of Study Medication Administration Assessment</li> <li>• Blindedness Assessment</li> <li>• DNA testing for candidate genetic modifiers of DMD</li> </ul>                                                                                                                                                                                                                                                                                                                                                                                                                                                                                                                                                                                                                                                                                                                                                                                               |
| <b>Statistical Methods</b>        | <p><b>Sample Size:</b></p> <p>This is a randomized, double-blind, parallel group, placebo- and active-controlled study. Study medication is administered daily in this Phase IIb trial. Data for untreated subjects from the Cooperative International Neuromuscular Research Group (CINRG) Duchenne Natural History Study and data for prednisone-treated subjects from the CINRG Prednisone study were used to help</p>                                                                                                                                                                                                                                                                                                                                                                                                                                                                                                                                                                                                                                                                                                                                     |



313  
 314  
 315  
 316  
 317  
 318  
 319  
 320  
 321  
 322  
 323  
 324  
 325  
 326  
 327  
 328  
 329  
 330  
 331  
 332  
 333  
 334  
 335  
 336  
 337  
 338  
 339  
 340  
 341  
 342  
 343

|                                  | <p>estimate sample sizes for this study.</p> <p>In the vamorolone VBP15-003 study and the interim analysis of the VBP15-LTE study, doses of 0.25 and 0.75 mg/kg/day showed little evidence of clinical benefit, whereas doses of 2.0 and 6.0 mg/kg/day both showed clear evidence of clinical benefit comparable to that seen with glucocorticoids (prednisone and deflazacort).</p> <p>In consideration of the primary efficacy endpoint in the current study, comparison of 6.0 mg/kg/day vamorolone versus placebo, sample size calculations were performed using data from vamorolone-treated subjects from the VBP15-002/VBP15-003 24-week treatment period. The analysis compared TTSTAND velocity from the combined 2.0 and 6.0 mg/kg/day groups (Treatment Group) to the combined 0.25 and 0.75 mg/kg/day groups (Pseudo-Placebo Group).</p> <p>Least squares (LS) means from the mixed model for repeated measures (MMRM) modeling of VBP15-002/VBP15-003 24-week data were used as parameter estimates of the population means in the sample size calculations for the comparison of the Treatment Group (2.0 + 6.0 mg/kg/day) vs. the Pseudo-Placebo Group (0.25 + 0.75 mg/kg/day) on the mean change from baseline at Week 24. For the estimates of standard deviations within each comparison group, simple descriptive statistics from the VBP15-002/VBP15-003 24-week data were used. Power was estimated using two-sided t-tests assuming unequal variance, with alpha =0.05.</p> <p>The following table shows the resultant estimated power for various sample sizes per comparison group for comparing the Treatment Group (2.0 + 6.0 mg/kg/day) vs. the Pseudo-Placebo Group (0.25 + 0.75 mg/kg/day) on the mean change from baseline at Week 24 for the alternative hypothesis that <math>H1: \mu_1 \neq \mu_2</math> assuming an alpha level of 0.05 and parameter estimates from the analyses described above for TTSTAND velocity:</p> <table border="1" style="width: 100%; border-collapse: collapse; text-align: center;"> <thead> <tr> <th>Sample Size per Comparison Group</th> <th><math>\mu_1</math> (Pseudo-Placebo)</th> <th><math>\mu_2</math> (Treatment Group)</th> <th><math>\sigma_1</math> (Pseudo-Placebo)</th> <th><math>\sigma_2</math> (Treatment Group)</th> <th>Estimated Power</th> </tr> </thead> <tbody> <tr> <td>25</td> <td>-0.0052</td> <td>0.0450</td> <td>0.0628</td> <td>0.0530</td> <td>84.89%</td> </tr> <tr> <td>28</td> <td>-0.0052</td> <td>0.0450</td> <td>0.0628</td> <td>0.0530</td> <td>88.76%</td> </tr> <tr> <td>30</td> <td>-0.0052</td> <td>0.0450</td> <td>0.0628</td> <td>0.0530</td> <td>90.81%</td> </tr> </tbody> </table> <p>The sample size of 25 per treatment group for 2.0 mg/kg/day, 6.0 mg/kg/day, prednisone, and placebo will result in a total enrollment of 100 subjects which will provide approximately 85% power at alpha level 0.05 to detect a statistically significant difference between 6.0 mg/kg/day and placebo on TTSTAND velocity at Week 24. Similarly, a total enrollment of 120 subjects (30 per treatment group) will provide approximately 91% power at alpha level 0.05 to detect a statistically significant difference between 6.0 mg/kg/day and placebo on TTSTAND velocity at Week 24.</p> <p>Note that subjects in the prednisone and placebo groups will actually be randomized into two groups each:</p> <ul style="list-style-type: none"> <li>• Prednisone 0.75 mg/kg/day → Vamorolone 2.0 mg/kg/day (n=15);</li> <li>• Prednisone 0.75 mg/kg/day → Vamorolone 6.0 mg/kg/day (n=15);</li> <li>• Placebo → Vamorolone 2.0 mg/kg/day (n=15); or</li> <li>• Placebo → Vamorolone 6.0 mg/kg/day (n=15).</li> </ul> | Sample Size per Comparison Group | $\mu_1$ (Pseudo-Placebo)    | $\mu_2$ (Treatment Group)    | $\sigma_1$ (Pseudo-Placebo) | $\sigma_2$ (Treatment Group) | Estimated Power | 25 | -0.0052 | 0.0450 | 0.0628 | 0.0530 | 84.89% | 28 | -0.0052 | 0.0450 | 0.0628 | 0.0530 | 88.76% | 30 | -0.0052 | 0.0450 | 0.0628 | 0.0530 | 90.81% |
|----------------------------------|------------------------------------------------------------------------------------------------------------------------------------------------------------------------------------------------------------------------------------------------------------------------------------------------------------------------------------------------------------------------------------------------------------------------------------------------------------------------------------------------------------------------------------------------------------------------------------------------------------------------------------------------------------------------------------------------------------------------------------------------------------------------------------------------------------------------------------------------------------------------------------------------------------------------------------------------------------------------------------------------------------------------------------------------------------------------------------------------------------------------------------------------------------------------------------------------------------------------------------------------------------------------------------------------------------------------------------------------------------------------------------------------------------------------------------------------------------------------------------------------------------------------------------------------------------------------------------------------------------------------------------------------------------------------------------------------------------------------------------------------------------------------------------------------------------------------------------------------------------------------------------------------------------------------------------------------------------------------------------------------------------------------------------------------------------------------------------------------------------------------------------------------------------------------------------------------------------------------------------------------------------------------------------------------------------------------------------------------------------------------------------------------------------------------------------------------------------------------------------------------------------------------------------------------------------------------------------------------------------------------------------------------------------------------------------------------------------------------------------------------------------------------------------------------------------------------------------------------------------------------------------------------------------------------------------------------------------------------------------------------------------------------------------------------------------------------------------------------------------------------------------------------------------------------------------------------------------------------------------------------------------------------------------------------------------------------------------------------------------------------------------------------------------------------------------------------------------------------------------------------------------------------------------------------------------------------------------------------------------------------------------------------------------------------------------------------------------------------------|----------------------------------|-----------------------------|------------------------------|-----------------------------|------------------------------|-----------------|----|---------|--------|--------|--------|--------|----|---------|--------|--------|--------|--------|----|---------|--------|--------|--------|--------|
| Sample Size per Comparison Group | $\mu_1$ (Pseudo-Placebo)                                                                                                                                                                                                                                                                                                                                                                                                                                                                                                                                                                                                                                                                                                                                                                                                                                                                                                                                                                                                                                                                                                                                                                                                                                                                                                                                                                                                                                                                                                                                                                                                                                                                                                                                                                                                                                                                                                                                                                                                                                                                                                                                                                                                                                                                                                                                                                                                                                                                                                                                                                                                                                                                                                                                                                                                                                                                                                                                                                                                                                                                                                                                                                                                                                                                                                                                                                                                                                                                                                                                                                                                                                                                                                     | $\mu_2$ (Treatment Group)        | $\sigma_1$ (Pseudo-Placebo) | $\sigma_2$ (Treatment Group) | Estimated Power             |                              |                 |    |         |        |        |        |        |    |         |        |        |        |        |    |         |        |        |        |        |
| 25                               | -0.0052                                                                                                                                                                                                                                                                                                                                                                                                                                                                                                                                                                                                                                                                                                                                                                                                                                                                                                                                                                                                                                                                                                                                                                                                                                                                                                                                                                                                                                                                                                                                                                                                                                                                                                                                                                                                                                                                                                                                                                                                                                                                                                                                                                                                                                                                                                                                                                                                                                                                                                                                                                                                                                                                                                                                                                                                                                                                                                                                                                                                                                                                                                                                                                                                                                                                                                                                                                                                                                                                                                                                                                                                                                                                                                                      | 0.0450                           | 0.0628                      | 0.0530                       | 84.89%                      |                              |                 |    |         |        |        |        |        |    |         |        |        |        |        |    |         |        |        |        |        |
| 28                               | -0.0052                                                                                                                                                                                                                                                                                                                                                                                                                                                                                                                                                                                                                                                                                                                                                                                                                                                                                                                                                                                                                                                                                                                                                                                                                                                                                                                                                                                                                                                                                                                                                                                                                                                                                                                                                                                                                                                                                                                                                                                                                                                                                                                                                                                                                                                                                                                                                                                                                                                                                                                                                                                                                                                                                                                                                                                                                                                                                                                                                                                                                                                                                                                                                                                                                                                                                                                                                                                                                                                                                                                                                                                                                                                                                                                      | 0.0450                           | 0.0628                      | 0.0530                       | 88.76%                      |                              |                 |    |         |        |        |        |        |    |         |        |        |        |        |    |         |        |        |        |        |
| 30                               | -0.0052                                                                                                                                                                                                                                                                                                                                                                                                                                                                                                                                                                                                                                                                                                                                                                                                                                                                                                                                                                                                                                                                                                                                                                                                                                                                                                                                                                                                                                                                                                                                                                                                                                                                                                                                                                                                                                                                                                                                                                                                                                                                                                                                                                                                                                                                                                                                                                                                                                                                                                                                                                                                                                                                                                                                                                                                                                                                                                                                                                                                                                                                                                                                                                                                                                                                                                                                                                                                                                                                                                                                                                                                                                                                                                                      | 0.0450                           | 0.0628                      | 0.0530                       | 90.81%                      |                              |                 |    |         |        |        |        |        |    |         |        |        |        |        |    |         |        |        |        |        |

344  
 345  
 346  
 347  
 348  
 349  
 350  
 351  
 352  
 353  
 354  
 355  
 356  
 357

358  
359

|  |                                                                                                                                                                                                                                                                                                                                                                                                                                                                                                                                                                                                                                                                                                                                                                                                                                                                                                                                                                                                                                                                                                                                                                                                                                                                                                                                                                                                                                                                                                                                                                                                                                                                                                                                                                                                                                                                                                                                                                                                                                                                                                                                                                                                                                                                                                                                                                                                                                                                                                                                                                                                                                                                                                                                                                                                                                                                                                                                                                                                                                                                                                                                                                                                                                    |
|--|------------------------------------------------------------------------------------------------------------------------------------------------------------------------------------------------------------------------------------------------------------------------------------------------------------------------------------------------------------------------------------------------------------------------------------------------------------------------------------------------------------------------------------------------------------------------------------------------------------------------------------------------------------------------------------------------------------------------------------------------------------------------------------------------------------------------------------------------------------------------------------------------------------------------------------------------------------------------------------------------------------------------------------------------------------------------------------------------------------------------------------------------------------------------------------------------------------------------------------------------------------------------------------------------------------------------------------------------------------------------------------------------------------------------------------------------------------------------------------------------------------------------------------------------------------------------------------------------------------------------------------------------------------------------------------------------------------------------------------------------------------------------------------------------------------------------------------------------------------------------------------------------------------------------------------------------------------------------------------------------------------------------------------------------------------------------------------------------------------------------------------------------------------------------------------------------------------------------------------------------------------------------------------------------------------------------------------------------------------------------------------------------------------------------------------------------------------------------------------------------------------------------------------------------------------------------------------------------------------------------------------------------------------------------------------------------------------------------------------------------------------------------------------------------------------------------------------------------------------------------------------------------------------------------------------------------------------------------------------------------------------------------------------------------------------------------------------------------------------------------------------------------------------------------------------------------------------------------------------|
|  | <p>These groups will be pooled by initial treatment (prednisone or placebo) for the Treatment Period #1 analyses.</p> <p>If the number of subjects who withdraw early from the study is high, additional subjects may be enrolled to achieve approximately 120 subjects completing the Week 24 Visit assessments.</p> <p><b>Analysis Populations:</b></p> <p>Four populations will be defined for data analysis: the Safety Population, the modified Intent-to-Treat Population, the Per Protocol Population (PPP), and the Pharmacokinetic (PK) Population.</p> <p><u>Safety Population</u></p> <p>All subjects who receive at least one dose of study medication will be included in the Safety Population. The Safety Population is the primary analysis population for safety and PD assessments. Results will be presented “as treated.”</p> <p><u>Modified Intent-to-Treat (mITT) Population</u></p> <p>All subjects who receive at least one dose of study medication and have at least one post-baseline assessment will be included in the mITT Population. The mITT Population is the primary analysis population for clinical efficacy. Subjects who receive at least one dose of study medication but never have post-baseline assessments will be excluded. Results will be presented “as randomized.”</p> <p><u>Per Protocol Population</u></p> <p>The PPP will be those subjects in the mITT Population who had no major protocol deviations and will be the secondary analysis population for analysis of the efficacy data. The PPP will also exclude some subjects because of missed assessments due to the COVID-19 pandemic. Exclusion of subjects from the PPP will be made on a subject-by-subject basis prior to database hard lock.</p> <p><u>Pharmacokinetic (PK) Population</u></p> <p>All subjects who receive at least one dose of vamorolone study medication and have sufficient data for PK analysis will be included in the PK Population.</p> <p><b>General Statistical Considerations:</b></p> <p>All measurements will be analyzed based upon the type of distribution and descriptive statistics presented by treatment group and time point, as appropriate. No formal interim statistical analyses are planned, apart from the interim unblinded safety data views and presentations to be created for the Data and Safety Monitoring Board (DSMB). The Week 24 analyses are the primary analyses for this study and will be performed after all subjects have completed Week 24 of Treatment Period #1. The Week 48 analyses (vamorolone versus untreated historical controls and vamorolone versus prednisone-treated historical controls) will be performed after all subjects have completed Treatment Period #2. Missing values for safety outcomes will be treated as missing, unless stated otherwise.</p> <p>Baseline measurement is defined as the last non-missing value prior to the first dose of study drug.</p> <p>Treatment Period #1 analyses will be summarized by four treatment groups:</p> <ul style="list-style-type: none"><li>• Vamorolone 2.0 mg/kg/day (n=30);</li><li>• Vamorolone 6.0 mg/kg/day (n=30);</li><li>• Prednisone 0.75 mg/kg/day (n=30); and</li></ul> |
|--|------------------------------------------------------------------------------------------------------------------------------------------------------------------------------------------------------------------------------------------------------------------------------------------------------------------------------------------------------------------------------------------------------------------------------------------------------------------------------------------------------------------------------------------------------------------------------------------------------------------------------------------------------------------------------------------------------------------------------------------------------------------------------------------------------------------------------------------------------------------------------------------------------------------------------------------------------------------------------------------------------------------------------------------------------------------------------------------------------------------------------------------------------------------------------------------------------------------------------------------------------------------------------------------------------------------------------------------------------------------------------------------------------------------------------------------------------------------------------------------------------------------------------------------------------------------------------------------------------------------------------------------------------------------------------------------------------------------------------------------------------------------------------------------------------------------------------------------------------------------------------------------------------------------------------------------------------------------------------------------------------------------------------------------------------------------------------------------------------------------------------------------------------------------------------------------------------------------------------------------------------------------------------------------------------------------------------------------------------------------------------------------------------------------------------------------------------------------------------------------------------------------------------------------------------------------------------------------------------------------------------------------------------------------------------------------------------------------------------------------------------------------------------------------------------------------------------------------------------------------------------------------------------------------------------------------------------------------------------------------------------------------------------------------------------------------------------------------------------------------------------------------------------------------------------------------------------------------------------------|

360  
361

|  |                                                                                                                                                                                                                                                                                                                                                                                                                                                                                                                                                                                                                                                                                                                                                                                                                                                                                                                                                                                                                                                                                                                                                                                                                                                                                                                                                                                                                                                                                                                                                                                                                                                                                                                                                                                                                                                                                                                                                                                                                                                                                                                                                                                                                                                                                                                                                                                                                                                                                                                                                                                                                                                                                                                                                                                                                                                                                                                                                                                                                                                                                                                                                                                                                                                                                                                                                                     |
|--|---------------------------------------------------------------------------------------------------------------------------------------------------------------------------------------------------------------------------------------------------------------------------------------------------------------------------------------------------------------------------------------------------------------------------------------------------------------------------------------------------------------------------------------------------------------------------------------------------------------------------------------------------------------------------------------------------------------------------------------------------------------------------------------------------------------------------------------------------------------------------------------------------------------------------------------------------------------------------------------------------------------------------------------------------------------------------------------------------------------------------------------------------------------------------------------------------------------------------------------------------------------------------------------------------------------------------------------------------------------------------------------------------------------------------------------------------------------------------------------------------------------------------------------------------------------------------------------------------------------------------------------------------------------------------------------------------------------------------------------------------------------------------------------------------------------------------------------------------------------------------------------------------------------------------------------------------------------------------------------------------------------------------------------------------------------------------------------------------------------------------------------------------------------------------------------------------------------------------------------------------------------------------------------------------------------------------------------------------------------------------------------------------------------------------------------------------------------------------------------------------------------------------------------------------------------------------------------------------------------------------------------------------------------------------------------------------------------------------------------------------------------------------------------------------------------------------------------------------------------------------------------------------------------------------------------------------------------------------------------------------------------------------------------------------------------------------------------------------------------------------------------------------------------------------------------------------------------------------------------------------------------------------------------------------------------------------------------------------------------------|
|  | <ul style="list-style-type: none"><li>• Placebo (n=30).</li></ul> <p>Treatment Period #2 analyses (besides historical control comparison data) will be summarized by six treatment groups:</p> <ul style="list-style-type: none"><li>• Vamorolone 2.0 mg/kg/day → Vamorolone 2.0 mg/kg/day (n=30);</li><li>• Vamorolone 6.0 mg/kg/day → Vamorolone 6.0 mg/kg/day (n=30);</li><li>• Prednisone 0.75 mg/kg/day → Vamorolone 2.0 mg/kg/day (n=15);</li><li>• Prednisone 0.75 mg/kg/day → Vamorolone 6.0 mg/kg/day (n=15);</li><li>• Placebo → Vamorolone 2.0 mg/kg/day (n=15); and</li><li>• Placebo → Vamorolone 6.0 mg/kg/day (n=15).</li></ul> <p><b>Adjustment for Multiple Comparisons:</b></p> <p>The primary efficacy endpoint tests vamorolone 6.0 mg/kg/day vs. placebo using TTSTAND velocity at Week 24 and occurs during Treatment Period #1 of the study. The primary efficacy endpoint supports the primary objective of this study. The study is thus powered for the efficacy comparison using an alpha level of 0.05 for success.</p> <p>The secondary efficacy endpoints will be tested at Week 24 along with the primary efficacy endpoint using a fixed sequential testing process where the fixed sequence of testing will be done in the following order:</p> <ol style="list-style-type: none"><li>1. TTSTAND velocity, vamorolone 2.0 mg/kg/day vs placebo</li><li>2. 6 Minute Walk Test (6MWT) meters walked, vamorolone 6.0 mg/kg/day vs. placebo</li><li>3. 6 Minute Walk Test (6MWT) meters walked, vamorolone 2.0 mg/kg/day vs. placebo</li><li>4. Time to Run/Walk (TTRW) 10 meters velocity, vamorolone 6.0 mg/kg/day vs. placebo</li><li>5. Time to Run/Walk (TTRW) 10 meters velocity, vamorolone 2.0 mg/kg/day vs. placebo</li><li>6. 6MWT meters walked, vamorolone 6.0 mg/kg/day vs. prednisone</li><li>7. 6MWT meters walked, vamorolone 2.0 mg/kg/day vs. prednisone</li></ol> <p>Each test in the sequence will be carried out using a two-sided alpha level of 0.05. Statistical testing of the primary/secondary efficacy endpoints will stop if a p-value &gt;0.05 occurs or if a p-value ≤ 0.05 occurs in the wrong direction. In case the fixed sequential testing process stops, the results of the subsequent tests will be reported with nominal p-values, but p-values ≤ 0.05 in the right direction will not be considered proof of statistical testing success in these subsequent tests.</p> <p>All other analyses will not be corrected for multiple comparisons (tests will be performed at the 0.05 alpha level), as they will be viewed and handled in the perspective of not testing a formal hypothesis.</p> <p><b>Efficacy Analyses:</b></p> <p>All evaluations of clinical efficacy will be listed and presented using descriptive statistics per treatment group and time point. The primary efficacy outcome is TTSTAND (velocity), comparison of vamorolone 6.0 mg/kg/day vs placebo. Secondary and exploratory efficacy outcomes are TTSTAND (velocity), comparison of vamorolone 2.0 mg/kg/day vs placebo; the NSAA assessment; TTCLIMB (velocity); TTRW (velocity); 6MWT; hand-held myometry (elbow flexors and knee extensors); and ROM.</p> <p>The primary efficacy outcome TTSTAND (velocity) change from baseline to Week 24 will be compared between the 6.0 mg/kg/day vamorolone dose group</p> |
|--|---------------------------------------------------------------------------------------------------------------------------------------------------------------------------------------------------------------------------------------------------------------------------------------------------------------------------------------------------------------------------------------------------------------------------------------------------------------------------------------------------------------------------------------------------------------------------------------------------------------------------------------------------------------------------------------------------------------------------------------------------------------------------------------------------------------------------------------------------------------------------------------------------------------------------------------------------------------------------------------------------------------------------------------------------------------------------------------------------------------------------------------------------------------------------------------------------------------------------------------------------------------------------------------------------------------------------------------------------------------------------------------------------------------------------------------------------------------------------------------------------------------------------------------------------------------------------------------------------------------------------------------------------------------------------------------------------------------------------------------------------------------------------------------------------------------------------------------------------------------------------------------------------------------------------------------------------------------------------------------------------------------------------------------------------------------------------------------------------------------------------------------------------------------------------------------------------------------------------------------------------------------------------------------------------------------------------------------------------------------------------------------------------------------------------------------------------------------------------------------------------------------------------------------------------------------------------------------------------------------------------------------------------------------------------------------------------------------------------------------------------------------------------------------------------------------------------------------------------------------------------------------------------------------------------------------------------------------------------------------------------------------------------------------------------------------------------------------------------------------------------------------------------------------------------------------------------------------------------------------------------------------------------------------------------------------------------------------------------------------------|

362  
363

|  |                                                                                                                                                                                                                                                                                                                                                                                                                                                                                                                                                                                                                                                                                                                                                                                                                                                                                                                                                                                                                                                                                                                                                                                                                                                                                                                                                                                                                                                                                                                                                                                                                                                                                                                                                                                                                                                                                                                                                                                                                                                                                                                                                                                                                                                                                                                                                                                                                                                                                                                                                                                                                                                                                                                                                                                                                                                                                                                                                                                                                                                                                                                                                                                                                                                                                                                                                                                                                                                                                                                                                                                                                                                                                                  |
|--|--------------------------------------------------------------------------------------------------------------------------------------------------------------------------------------------------------------------------------------------------------------------------------------------------------------------------------------------------------------------------------------------------------------------------------------------------------------------------------------------------------------------------------------------------------------------------------------------------------------------------------------------------------------------------------------------------------------------------------------------------------------------------------------------------------------------------------------------------------------------------------------------------------------------------------------------------------------------------------------------------------------------------------------------------------------------------------------------------------------------------------------------------------------------------------------------------------------------------------------------------------------------------------------------------------------------------------------------------------------------------------------------------------------------------------------------------------------------------------------------------------------------------------------------------------------------------------------------------------------------------------------------------------------------------------------------------------------------------------------------------------------------------------------------------------------------------------------------------------------------------------------------------------------------------------------------------------------------------------------------------------------------------------------------------------------------------------------------------------------------------------------------------------------------------------------------------------------------------------------------------------------------------------------------------------------------------------------------------------------------------------------------------------------------------------------------------------------------------------------------------------------------------------------------------------------------------------------------------------------------------------------------------------------------------------------------------------------------------------------------------------------------------------------------------------------------------------------------------------------------------------------------------------------------------------------------------------------------------------------------------------------------------------------------------------------------------------------------------------------------------------------------------------------------------------------------------------------------------------------------------------------------------------------------------------------------------------------------------------------------------------------------------------------------------------------------------------------------------------------------------------------------------------------------------------------------------------------------------------------------------------------------------------------------------------------------------|
|  | <p>and the placebo group using a restricted maximum likelihood (REML)-based mixed model for repeated measures (MMRM). This model includes fixed effects for treatment (vamorolone 2.0 mg/kg/day, vamorolone 6.0 mg/kg/day, prednisone 0.75 mg/kg/day, and placebo), week, baseline TTSTAND, age group (per stratification), and the treatment-by-week interaction. Study week will be included in the model as a categorical variable (Weeks 6, 12, and 24) along with the treatment-by-week interaction. Within this model, pairwise comparisons (using least squares [LS] mean contrasts) will be made to compare TTSTAND velocity at 24 weeks for the vamorolone 6.0 mg/kg/day dose level with placebo (primary efficacy outcome).</p> <p>For secondary outcomes, the same models will be used as for the primary outcome (REML-based MMRM including fixed effects for treatment [vamorolone 2.0 mg/kg/day, vamorolone 6.0 mg/kg/day, prednisone 0.75 mg/kg/day, and placebo], age group [<math>&lt;6</math> years; <math>\geq 6</math> years], week, baseline, and treatment-by-week interaction).</p> <p>An unstructured covariance matrix will be used, and underlying modelling assumptions will be checked. If differences between baseline characteristics exist between the treatment groups, it will be investigated if adjustment for these characteristics is clinically relevant and necessary. The secondary outcome measures will be compared using similar models.</p> <p>Sensitivity analyses will be performed to assess the impact of COVID-19 on the primary endpoint. Additional sensitivity and supportive analyses will be performed on the primary and secondary outcomes. Full details will be provided in the SAP.</p> <p>Subjects who are randomized to receive vamorolone 2.0 mg/kg/day or vamorolone 6.0 mg/kg/day for both treatment periods will have TTSTAND velocity change from baseline data captured over 48 weeks compared with untreated DMD historical control data. Full details will be provided in the Statistical Analysis Plan (SAP).</p> <p><b>Patient Reported Outcome Analyses:</b></p> <p>Patient Reported Outcomes including the TSQM, PODCI, PARS III, Ease of Study Medication Administration Assessment, and the Blindedness Assessment will be listed and presented using descriptive statistics by treatment and time point. In addition, comparison will be made for each vamorolone dose group with placebo for the PODCI and for each vamorolone dose group with prednisone and placebo for the PARS III, with p values computed for the comparisons. Full details will be provided in the SAP.</p> <p><b>Safety Analyses:</b></p> <p>All evaluations of clinical safety will be listed and presented using descriptive statistics per treatment group and time point. For the safety analyses during Treatment Period #1, the vamorolone dose levels will be compared to prednisone, as specified in the SAP.</p> <p>Safety data will include BMI, weight, vital signs, 2D-echocardiogram, DXA scan, spine x-ray, eye examination results, ACTH Stimulation Test results, and ECG results, and these will be presented using descriptive statistics. Safety laboratory data will be summarized using descriptive statistics, and out-of-range values will be listed. Adverse events will be summarized overall and by treatment group, system organ class (SOC) and preferred term (using the Medical Dictionary for Regulatory Activities [MedDRA]); by treatment group and relationship to study medication; and by treatment group and intensity (CTCAE grade). Suicidality and abuse potential associated with treatment will</p> |
|--|--------------------------------------------------------------------------------------------------------------------------------------------------------------------------------------------------------------------------------------------------------------------------------------------------------------------------------------------------------------------------------------------------------------------------------------------------------------------------------------------------------------------------------------------------------------------------------------------------------------------------------------------------------------------------------------------------------------------------------------------------------------------------------------------------------------------------------------------------------------------------------------------------------------------------------------------------------------------------------------------------------------------------------------------------------------------------------------------------------------------------------------------------------------------------------------------------------------------------------------------------------------------------------------------------------------------------------------------------------------------------------------------------------------------------------------------------------------------------------------------------------------------------------------------------------------------------------------------------------------------------------------------------------------------------------------------------------------------------------------------------------------------------------------------------------------------------------------------------------------------------------------------------------------------------------------------------------------------------------------------------------------------------------------------------------------------------------------------------------------------------------------------------------------------------------------------------------------------------------------------------------------------------------------------------------------------------------------------------------------------------------------------------------------------------------------------------------------------------------------------------------------------------------------------------------------------------------------------------------------------------------------------------------------------------------------------------------------------------------------------------------------------------------------------------------------------------------------------------------------------------------------------------------------------------------------------------------------------------------------------------------------------------------------------------------------------------------------------------------------------------------------------------------------------------------------------------------------------------------------------------------------------------------------------------------------------------------------------------------------------------------------------------------------------------------------------------------------------------------------------------------------------------------------------------------------------------------------------------------------------------------------------------------------------------------------------------|

364  
365

|  |                                                                                                                                                                                                                                                                                                                                                                                                                                                                                                                                                                                                                                                                                                                                                                                                                                                                                                                                                                                                                                                                                                                                                                                                                                                                                                                                                                                                                                                                                                                                                                                                                                                                                                                                                                                                                                                                                                                                                                                                                                                  |
|--|--------------------------------------------------------------------------------------------------------------------------------------------------------------------------------------------------------------------------------------------------------------------------------------------------------------------------------------------------------------------------------------------------------------------------------------------------------------------------------------------------------------------------------------------------------------------------------------------------------------------------------------------------------------------------------------------------------------------------------------------------------------------------------------------------------------------------------------------------------------------------------------------------------------------------------------------------------------------------------------------------------------------------------------------------------------------------------------------------------------------------------------------------------------------------------------------------------------------------------------------------------------------------------------------------------------------------------------------------------------------------------------------------------------------------------------------------------------------------------------------------------------------------------------------------------------------------------------------------------------------------------------------------------------------------------------------------------------------------------------------------------------------------------------------------------------------------------------------------------------------------------------------------------------------------------------------------------------------------------------------------------------------------------------------------|
|  | <p>be assessed by examination of adverse event data. Full details will be provided in the SAP.</p> <p>In Treatment Period #1, BMI z-score change from baseline results will be compared between treatment groups using an REML-based MMRM analysis with treatment group, week of the visit, and the treatment-by-week interaction as factors, and baseline BMI z-score and age group as a covariate. Week will be included in the model as a categorical variable (Week 12 and 24) along with the treatment-by-week interaction. An unstructured within-subject covariance matrix will be used. If this analysis fails to converge, Akaike's information criterion will be used to select the best covariance structure from compound symmetry and autoregressive-1 (AR(1)). The Kenward-Roger approximation will be used to estimate denominator degrees of freedom.</p> <p>Change from baseline in all continuous clinical laboratory test results will be tested using one sample t-tests with p-values presented along with the descriptive statistics at each assessment visit within each treatment group.</p> <p><b>Pharmacodynamics Analyses:</b></p> <p>Serum PD biomarkers of adrenal axis suppression, insulin resistance, and bone turnover will be assessed. PD biomarkers will be analyzed using MMRMs similar to the primary efficacy model. Plots will be created. Additional exploratory PD biomarkers of both safety and efficacy may be assessed. Vamorolone-treated groups will be compared to both prednisone-treated and placebo groups.</p> <p><b>Pharmacokinetic Analyses:</b></p> <p>The 2-hr post-dose plasma concentration measurements of vamorolone at Week 30 will be used for comparison of drug exposures between the two dosing groups. They will be added to PK data from previous studies in DMD boys for comparison with measurements obtained in healthy adult male subjects. All PK data will be combined in a population assessment of plasma concentrations in relation to dose and age of subjects.</p> |
|--|--------------------------------------------------------------------------------------------------------------------------------------------------------------------------------------------------------------------------------------------------------------------------------------------------------------------------------------------------------------------------------------------------------------------------------------------------------------------------------------------------------------------------------------------------------------------------------------------------------------------------------------------------------------------------------------------------------------------------------------------------------------------------------------------------------------------------------------------------------------------------------------------------------------------------------------------------------------------------------------------------------------------------------------------------------------------------------------------------------------------------------------------------------------------------------------------------------------------------------------------------------------------------------------------------------------------------------------------------------------------------------------------------------------------------------------------------------------------------------------------------------------------------------------------------------------------------------------------------------------------------------------------------------------------------------------------------------------------------------------------------------------------------------------------------------------------------------------------------------------------------------------------------------------------------------------------------------------------------------------------------------------------------------------------------|

366  
367  
368  
369  
370  
371  
372  
373  
374  
375  
376  
377  
378  
379  
380  
381  
382  
383  
384  
385  
386  
387  
388  
389  
390

**TABLE OF CONTENTS**

**SERIOUS ADVERSE EVENT CONTACT INFORMATION .....4**

**PROTOCOL AMENDMENT TRACKING..... 5**

**STUDY SYNOPSIS ..... 8**

**LIST OF TABLES ..... 30**

**LIST OF FIGURES ..... 31**

**LIST OF ABBREVIATIONS ..... 32**

**1 INTRODUCTION..... 36**

**1.1 BACKGROUND AND UNMET NEED..... 36**

**1.2 NONCLINICAL EXPERIENCE ..... 38**

**1.2.1 Safety Pharmacology ..... 39**

**1.2.2 Pharmacokinetics and Metabolism ..... 40**

**1.2.3 Toxicology ..... 44**

**1.3 CLINICAL EXPERIENCE..... 57**

**1.3.1 Phase I Study in Healthy Adult Male Volunteers (VBP15-001) ..... 57**

**1.3.2 Pharmacokinetics in Phase IIa Study in 4 to 7 years Duchenne  
Muscular Dystrophy Boys (VBP15-002)..... 69**

**1.3.3 Safety in Phase II Studies in 4 to7 years Duchenne Muscular  
Dystrophy Boys (VBP15-002 and VBP15-003)..... 72**

**1.4 RATIONALE FOR STUDY DESIGN ..... 74**

**1.5 OVERALL BENEFIT/RISK..... 78**

**2 STUDY OBJECTIVES AND ENDPOINTS .....79**

**2.1 STUDY OBJECTIVES ..... 79**

**2.1.1 Primary Objectives ..... 79**

|     |              |                                                                       |            |
|-----|--------------|-----------------------------------------------------------------------|------------|
| 391 | <b>2.1.2</b> | <b>Secondary Objectives.....</b>                                      | <b>80</b>  |
| 392 | <b>2.1.3</b> | <b>Exploratory Objectives.....</b>                                    | <b>81</b>  |
| 393 | <b>2.2</b>   | <b>STUDY ENDPOINTS .....</b>                                          | <b>82</b>  |
| 394 | <b>2.2.1</b> | <b>Safety Endpoints .....</b>                                         | <b>82</b>  |
| 395 | <b>2.2.2</b> | <b>Clinical Efficacy Endpoints.....</b>                               | <b>83</b>  |
| 396 | <b>2.2.3</b> | <b>Additional Exploratory Endpoints .....</b>                         | <b>86</b>  |
| 397 | <b>2.2.4</b> | <b>Pharmacodynamic Endpoints.....</b>                                 | <b>86</b>  |
| 398 | <b>2.2.5</b> | <b>Endpoints for Patient-Reported Outcomes .....</b>                  | <b>87</b>  |
| 399 | <b>3</b>     | <b>STUDY DESIGN.....</b>                                              | <b>88</b>  |
| 400 | <b>3.1</b>   | <b>OVERALL STUDY DESIGN.....</b>                                      | <b>88</b>  |
| 401 | <b>3.2</b>   | <b>RANDOMIZATION.....</b>                                             | <b>91</b>  |
| 402 | <b>3.3</b>   | <b>BLINDING</b>                                                       | <b>92</b>  |
| 403 | <b>3.4</b>   | <b>UNBLINDING .....</b>                                               | <b>93</b>  |
| 404 | <b>4</b>     | <b>SELECTION AND WITHDRAWAL OF STUDY SUBJECTS.....</b>                | <b>95</b>  |
| 405 | <b>4.1</b>   | <b>SUBJECT ENROLLMENT AND IDENTIFICATION LOG .....</b>                | <b>95</b>  |
| 406 | <b>4.2</b>   | <b>INCLUSION CRITERIA.....</b>                                        | <b>95</b>  |
| 407 | <b>4.3</b>   | <b>EXCLUSION CRITERIA .....</b>                                       | <b>97</b>  |
| 408 | <b>4.4</b>   | <b>WITHDRAWAL OF SUBJECTS FROM STUDY .....</b>                        | <b>99</b>  |
| 409 | <b>4.5</b>   | <b>TERMINATION OF STUDY.....</b>                                      | <b>100</b> |
| 410 | <b>5</b>     | <b>TREATMENT OF STUDY SUBJECTS .....</b>                              | <b>101</b> |
| 411 | <b>5.1</b>   | <b>STUDY MEDICATIONS ADMINISTERED .....</b>                           | <b>101</b> |
| 412 | <b>5.1.1</b> | <b>Study Medications Administered During Treatment Period #1.....</b> | <b>101</b> |
| 413 | <b>5.1.2</b> | <b>Study Medications Administered During Transition Period.....</b>   | <b>102</b> |
| 414 | <b>5.1.3</b> | <b>Study Medications Administered During Treatment Period #2 and</b>  |            |

|     |                                                                         |            |
|-----|-------------------------------------------------------------------------|------------|
| 415 | <b>the Dose-tapering Period .....</b>                                   | <b>103</b> |
| 416 | <b>5.2 IDENTITY OF INVESTIGATIONAL PRODUCT .....</b>                    | <b>104</b> |
| 417 | <b>5.3 DOSAGE SCHEDULE AND ADMINISTRATION OF STUDY MEDICATION .....</b> | <b>105</b> |
| 418 | <b>5.4 RATIONALE FOR DOSE SELECTION.....</b>                            | <b>108</b> |
| 419 | <b>5.5 TREATMENT COMPLIANCE.....</b>                                    | <b>110</b> |
| 420 | <b>5.6 STUDY DRUG DOSE INTERRUPTION OR DISCONTINUATION .....</b>        | <b>110</b> |
| 421 | <b>5.7 PRIOR AND CONCOMITANT MEDICATIONS AND THERAPIES.....</b>         | <b>111</b> |
| 422 | <b>5.7.1 Prior Therapy .....</b>                                        | <b>111</b> |
| 423 | <b>5.7.2 Concomitant Therapies .....</b>                                | <b>111</b> |
| 424 | <b>5.7.3 Prohibited Therapies .....</b>                                 | <b>112</b> |
| 425 | <b>5.7.4 Permitted Therapies .....</b>                                  | <b>113</b> |
| 426 | <b>5.7.5 Hydrocortisone .....</b>                                       | <b>113</b> |
| 427 | <b>5.7.6 Vitamin D.....</b>                                             | <b>114</b> |
| 428 | <b>5.8 STUDY MEDICATION MANAGEMENT.....</b>                             | <b>114</b> |
| 429 | <b>5.8.1 Packaging and Labeling of Study Medication.....</b>            | <b>114</b> |
| 430 | <b>5.8.2 Storage of Study Medication.....</b>                           | <b>116</b> |
| 431 | <b>5.8.3 Study Medication Shipping and Handling.....</b>                | <b>116</b> |
| 432 | <b>5.8.4 Study Medication Accountability .....</b>                      | <b>117</b> |
| 433 | <b>5.9 PROCEDURES FOR ASSIGNING SUBJECT STUDY NUMBERS .....</b>         | <b>118</b> |
| 434 | <b>6 STUDY SCHEDULE .....</b>                                           | <b>118</b> |
| 435 | <b>6.1 TIME AND EVENTS SCHEDULE .....</b>                               | <b>118</b> |
| 436 | <b>6.2 INFORMED CONSENT AND ASSENT PROCEDURES .....</b>                 | <b>126</b> |
| 437 | <b>6.2.1 HIPAA and Protected Health Information .....</b>               | <b>127</b> |
| 438 | <b>6.3 VISIT SCHEDULE AND PROCEDURES.....</b>                           | <b>127</b> |



|     |              |                                                                         |            |
|-----|--------------|-------------------------------------------------------------------------|------------|
| 439 | <b>6.3.1</b> | <b>Screening Period (Day -33 to -2)</b> .....                           | <b>128</b> |
| 440 | <b>6.3.2</b> | <b>Baseline Period (Day -1) Visit</b> .....                             | <b>130</b> |
| 441 | <b>6.3.3</b> | <b>Treatment Period #1 Day 1 Visit</b> .....                            | <b>131</b> |
| 442 | <b>6.3.4</b> | <b>Treatment Period #1 (Weeks 1-24)</b> .....                           | <b>133</b> |
| 443 | <b>6.3.5</b> | <b>Transition Period (Weeks 25-28)</b> .....                            | <b>135</b> |
| 444 | <b>6.3.6</b> | <b>Treatment Period #2 (Week 28 + 1 Day through Week 48)</b> .....      | <b>137</b> |
| 445 | <b>6.3.7</b> | <b>Dose-tapering Period (Weeks 49-52)</b> .....                         | <b>140</b> |
| 446 | <b>6.4</b>   | <b>SUBJECT DISCONTINUATION</b> .....                                    | <b>141</b> |
| 447 | <b>6.4.1</b> | <b>Early Discontinuation Prior to Week 24</b> .....                     | <b>143</b> |
| 448 | <b>6.4.2</b> | <b>Early Discontinuation After Week 24 and Prior to Week 28</b> .....   | <b>144</b> |
| 449 | <b>6.4.3</b> | <b>Early Discontinuation After Week 28 and Prior to Week 48</b> .....   | <b>144</b> |
| 450 | <b>6.5</b>   | <b>SUBJECT AND STUDY COMPLETION</b> .....                               | <b>145</b> |
| 451 | <b>7</b>     | <b>STUDY ASSESSMENTS AND MEASUREMENTS</b> .....                         | <b>145</b> |
| 452 | <b>7.1</b>   | <b>DEMOGRAPHIC ASSESSMENTS</b> .....                                    | <b>145</b> |
| 453 | <b>7.1.1</b> | <b>Genetic Modifiers of DMD</b> .....                                   | <b>145</b> |
| 454 | <b>7.2</b>   | <b>SAFETY AND TOLERABILITY ASSESSMENTS</b> .....                        | <b>145</b> |
| 455 | <b>7.2.1</b> | <b>Medical History</b> .....                                            | <b>145</b> |
| 456 | <b>7.2.2</b> | <b>Physical Examination, Cushingoid Features, Weight, and Height...</b> | <b>146</b> |
| 457 | <b>7.2.3</b> | <b>Vital Signs</b> .....                                                | <b>147</b> |
| 458 | <b>7.2.4</b> | <b>Clinical Laboratory Tests</b> .....                                  | <b>147</b> |
| 459 | <b>7.2.5</b> | <b>Chicken Pox Immunity</b> .....                                       | <b>151</b> |
| 460 | <b>7.2.6</b> | <b>Pharmacodynamic Biomarker Panel</b> .....                            | <b>151</b> |
| 461 | <b>7.2.7</b> | <b>ACTH Stimulation Test</b> .....                                      | <b>152</b> |
| 462 | <b>7.2.8</b> | <b>Population PK Assessment</b> .....                                   | <b>154</b> |

|     |               |                                                                   |            |
|-----|---------------|-------------------------------------------------------------------|------------|
| 463 | <b>7.2.9</b>  | <b>Total Blood Volume Required .....</b>                          | <b>154</b> |
| 464 | <b>7.2.10</b> | <b>12-Lead ECG.....</b>                                           | <b>156</b> |
| 465 | <b>7.2.11</b> | <b>2D-echocardiography .....</b>                                  | <b>156</b> |
| 466 | <b>7.2.12</b> | <b>Eye Examination .....</b>                                      | <b>157</b> |
| 467 | <b>7.2.13</b> | <b>Bone Health and DXA Scan (total body and spine).....</b>       | <b>157</b> |
| 468 | <b>7.2.14</b> | <b>Spine X-rays .....</b>                                         | <b>158</b> |
| 469 | <b>7.3</b>    | <b>ASSESSMENT OF MUSCLE STRENGTH AND FUNCTION.....</b>            | <b>158</b> |
| 470 | <b>7.3.1</b>  | <b>Time to Stand Test (TTSTAND) .....</b>                         | <b>158</b> |
| 471 | <b>7.3.2</b>  | <b>Time to Climb Test (TTCLIMB).....</b>                          | <b>159</b> |
| 472 | <b>7.3.3</b>  | <b>Time to Run/Walk Test (TTRW) .....</b>                         | <b>159</b> |
| 473 | <b>7.3.4</b>  | <b>North Star Ambulatory Assessment (NSAA).....</b>               | <b>159</b> |
| 474 | <b>7.3.5</b>  | <b>Six-minute Walk Test (6MWT) .....</b>                          | <b>160</b> |
| 475 | <b>7.3.6</b>  | <b>Hand-Held Myometry (elbow flexors and knee extensors).....</b> | <b>160</b> |
| 476 | <b>7.3.7</b>  | <b>Range of Motion (ROM) .....</b>                                | <b>160</b> |
| 477 | <b>7.4</b>    | <b>PATIENT-REPORTED OUTCOME MEASURES.....</b>                     | <b>161</b> |
| 478 | <b>7.4.1</b>  | <b>Pediatric Outcomes Data Collection Instrument (PODCI).....</b> | <b>161</b> |
| 479 | <b>7.4.2</b>  | <b>Treatment Satisfaction Questionnaire (TSQM).....</b>           | <b>161</b> |
| 480 | <b>7.4.3</b>  | <b>Behavioral Assessment .....</b>                                | <b>161</b> |
| 481 | <b>7.4.4</b>  | <b>Ease of Study Medication Administration Assessment .....</b>   | <b>162</b> |
| 482 | <b>7.4.5</b>  | <b>Blindedness Assessment.....</b>                                | <b>162</b> |
| 483 | <b>7.4.6</b>  | <b>Subject Diary .....</b>                                        | <b>162</b> |
| 484 | <b>7.5</b>    | <b>ADVERSE EVENTS AND SERIOUS ADVERSE EVENTS .....</b>            | <b>163</b> |
| 485 | <b>7.5.1</b>  | <b>Intensity .....</b>                                            | <b>164</b> |
| 486 | <b>7.5.2</b>  | <b>Relationship.....</b>                                          | <b>164</b> |

|     |               |                                                           |            |
|-----|---------------|-----------------------------------------------------------|------------|
| 487 | <b>7.5.3</b>  | <b>Clinical Laboratory Test Abnormalities.....</b>        | <b>166</b> |
| 488 | <b>7.5.4</b>  | <b>Follow-Up of Adverse Events.....</b>                   | <b>167</b> |
| 489 | <b>7.5.5</b>  | <b>Dosing Error.....</b>                                  | <b>167</b> |
| 490 | <b>7.5.6</b>  | <b>Serious Adverse Events .....</b>                       | <b>168</b> |
| 491 | <b>8</b>      | <b>STUDY COMMITTEES.....</b>                              | <b>171</b> |
| 492 | <b>8.1</b>    | <b>STUDY STEERING COMMITTEE.....</b>                      | <b>171</b> |
| 493 | <b>8.2</b>    | <b>DATA AND SAFETY MONITORING BOARD.....</b>              | <b>171</b> |
| 494 | <b>9</b>      | <b>DATA COLLECTION .....</b>                              | <b>172</b> |
| 495 | <b>9.1</b>    | <b>SOURCE DOCUMENTS .....</b>                             | <b>172</b> |
| 496 | <b>9.2</b>    | <b>ELECTRONIC CASE REPORT FORM COMPLETION.....</b>        | <b>173</b> |
| 497 | <b>9.3</b>    | <b>DATA PROCESSING.....</b>                               | <b>173</b> |
| 498 | <b>9.4</b>    | <b>SUBJECT DIARIES .....</b>                              | <b>174</b> |
| 499 | <b>10</b>     | <b>STATISTICAL METHODS AND PLANNED ANALYSES.....</b>      | <b>174</b> |
| 500 | <b>10.1</b>   | <b>SAMPLE SIZE DETERMINATION.....</b>                     | <b>174</b> |
| 501 | <b>10.2</b>   | <b>STATISTICAL AND ANALYTICAL PLAN (SAP).....</b>         | <b>176</b> |
| 502 | <b>10.2.1</b> | <b>Deviations from the Statistical Analysis Plan.....</b> | <b>176</b> |
| 503 | <b>10.3</b>   | <b>ANALYSIS POPULATIONS.....</b>                          | <b>176</b> |
| 504 | <b>10.3.1</b> | <b>Safety Population .....</b>                            | <b>176</b> |
| 505 | <b>10.3.2</b> | <b>Modified Intent-to-Treat (mITT) Population .....</b>   | <b>176</b> |
| 506 | <b>10.3.3</b> | <b>Per Protocol Population .....</b>                      | <b>177</b> |
| 507 | <b>10.3.4</b> | <b>Pharmacokinetic (PK) Population.....</b>               | <b>177</b> |
| 508 | <b>10.4</b>   | <b>MEASURES TAKEN TO AVOID/MINIMIZE BIAS.....</b>         | <b>177</b> |
| 509 | <b>10.5</b>   | <b>INTERIM ANALYSIS.....</b>                              | <b>177</b> |
| 510 | <b>10.6</b>   | <b>WEEK 24 ANALYSIS.....</b>                              | <b>177</b> |

|     |                                                                                  |            |
|-----|----------------------------------------------------------------------------------|------------|
| 511 | <b>10.7 WEEK 48 ANALYSIS</b> .....                                               | <b>177</b> |
| 512 | <b>10.8 MISSING, UNUSED, AND SPURIOUS DATA</b> .....                             | <b>178</b> |
| 513 | <b>10.9 STATISTICAL ANALYSIS</b> .....                                           | <b>178</b> |
| 514 | <b>10.9.1 General Considerations</b> .....                                       | <b>178</b> |
| 515 | <b>10.9.2 Adjustment for Multiple Comparisons</b> .....                          | <b>179</b> |
| 516 | <b>10.9.3 Subject Disposition, Demographics, and Baseline Characteristics</b> .. | <b>180</b> |
| 517 | <b>10.9.4 Efficacy Analyses</b> .....                                            | <b>181</b> |
| 518 | <b>10.9.5 Safety Analyses</b> .....                                              | <b>182</b> |
| 519 | <b>10.9.6 Pharmacodynamic Analyses</b> .....                                     | <b>183</b> |
| 520 | <b>10.9.7 Patient-Reported Outcome Exploratory Analyses</b> .....                | <b>184</b> |
| 521 | <b>10.9.8 Pharmacokinetic Analyses</b> .....                                     | <b>184</b> |
| 522 | <b>10.9.9 Concurrent Medications</b> .....                                       | <b>184</b> |
| 523 | <b>11 STUDY MANAGEMENT AND ETHICAL AND REGULATORY</b>                            |            |
| 524 | <b>REQUIREMENTS</b> .....                                                        | <b>185</b> |
| 525 | <b>11.1 REGULATORY APPROVAL AND GOOD CLINICAL PRACTICE</b> .....                 | <b>185</b> |
| 526 | <b>11.2 INVESTIGATOR RESPONSIBILITIES</b> .....                                  | <b>185</b> |
| 527 | <b>11.2.1 Subject Information and Informed Consent</b> .....                     | <b>185</b> |
| 528 | <b>11.2.2 Institutional Review Board/Independent Ethics Committee</b>            |            |
| 529 | <b>Approval and Other Institutional Requirements</b> .....                       | <b>186</b> |
| 530 | <b>11.2.3 Study Documentation</b> .....                                          | <b>187</b> |
| 531 | <b>11.2.4 Delegation of Investigator Responsibilities</b> .....                  | <b>189</b> |
| 532 | <b>11.3 PROTOCOL DEVIATIONS</b> .....                                            | <b>189</b> |
| 533 | <b>11.3.1 Protocol Deviation Definitions</b> .....                               | <b>189</b> |
| 534 | <b>11.3.2 Reporting Important Protocol Deviations</b> .....                      | <b>190</b> |

535     **11.4 STUDY RECORDS RETENTION AND DIRECT ACCESS TO SOURCE**

536             **DOCUMENTS ..... 190**

537     **11.5 STUDY MONITORING..... 191**

538     **11.6 QUALITY ASSURANCE..... 192**

539     **11.7 STUDY TERMINATION AND SITE CLOSURE..... 193**

540     **11.8 SITE TERMINATION ..... 193**

541     **11.9 DISCONTINUATION OF STUDY ..... 194**

542     **12 DISCLOSURE OF DATA..... 194**

543             **12.1 CONFIDENTIALITY ..... 194**

544             **12.2 PUBLICATION ..... 195**

545     **13 INVESTIGATOR PROTOCOL AGREEMENT ..... 196**

546     **14 REFERENCES..... 197**

547     **15 APPENDICES ..... 202**

548             **APPENDIX 15.1 PROTOCOL AMENDMENT #4 COMPLETE LIST OF CHANGES..... 203**

549  
550  
551  
552  
553  
554  
555  
556  
557  
558  
559  
560  
561  
562  
563  
564  
565  
566  
567  
568  
569  
570  
571  
572  
573  
574  
575  
576  
577  
578  
579  
580  
581  
582  
583  
584  
585

**LIST OF TABLES**

**Table 1. AUC<sub>0-24hr</sub> in Mice after 179 Days Treatment with 3 Dose Levels (5, 15 and 45 mg/kg/day)..... 50**

**Table 2. Summary of Pharmacokinetic Parameters for Vamorolone after Oral Administration of Single Doses of 0.1, 0.3, 1.0, 3.0, 8.0, and 20.0 mg/kg to Healthy Subjects Under Fasted Conditions ..... 58**

**Table 3. Summary of Pharmacokinetic Parameters for Vamorolone After Single Dose Oral Administration of 8 mg/kg to Healthy Subjects Under Fed and Fasted Conditions..... 60**

**Table 4. Summary of Pharmacokinetic Parameters for Vamorolone During Oral Administration of 1, 3, 9, and 20 mg/kg Doses Once Daily for 14 Days to Healthy Subjects Under Fasted Conditions ..... 62**

**Table 5. Summary of Pharmacokinetic Parameters for Vamorolone after Once Daily Oral Administration of 0.25, 0.75, 2.0 and 6.0 mg/kg Doses to DMD Boys..... 71**

**Table 6. Study Randomization Schedule ..... 75**

**Table 7. Study Medications for the Six Treatment Groups During Treatment Period #1 ..... 101**

**Table 8. Study Medications for the Six Treatment Groups During the Transition Period ..... 102**

**Table 9. Study Medications for the Six Treatment Groups During Treatment Period #2 and the Dose-tapering Period ..... 103**

**Table 10. Weight Bands for Prednisone or Matching Tablet Dosing ..... 105**

**Table 11. Schedule of Study Activities ..... 121**

**Table 12. Tablet Dose Tapering..... 136**

**Table 13. Suspension Dose Tapering..... 140**

**Table 14. Tablet Dose Tapering for Subjects Discontinuing Prior to Week 24 ..... 143**

**Table 15. Suspension Dose Tapering for Subjects Discontinuing Prior to Week 24..... 144**

**Table 16. Suspension Dose-Tapering for Subjects Discontinuing After Week 24 and Prior to Week 28..... 144**

**Table 17. Hematology, Chemistry, and Lipids Clinical Laboratory Tests..... 149**

**Table 18. Urinalysis Clinical Laboratory Tests ..... 150**

**Table 19. Pharmacodynamic Biomarkers – Secondary Safety Outcomes..... 152**

**Table 20. Blood Sample Number and Volume by Study Visit..... 155**

586

587

**LIST OF FIGURES**

588

589

**Figure 1 Liver Function Enzymes in GLP Chronic Toxicology Study in Mice  
(26 weeks)..... 51**

590

591

**Figure 2. Plasma Concentrations of Vamorolone (VBP15) after Oral  
Administration of Single Doses of 0.1, 0.3, 1, 3, 8, and 20 mg/kg to  
Healthy Subjects Under Fasted Conditions..... 58**

592

593

594

**Figure 3. Relationship Between Individual Subject Vamorolone AUC<sub>(inf)</sub> and  
Dose After Oral Administration of Single Doses of 0.1, 0.3, 1, 3, 8, and  
20 mg/kg to Healthy Subjects Under Fasted Conditions..... 59**

595

596

597

**Figure 4. Plasma Concentrations of Vamorolone (VBP15) After Single Dose  
Oral Administration of 8 mg/kg to Healthy Subjects Under Fed and  
Fasted Conditions..... 60**

598

599

600

**Figure 5. Plasma Concentrations of Vamorolone (VBP15) on Days 1 and 14  
During Oral Administration of 1, 3, 9, and 20 mg/kg Doses Once Daily  
for 14 Days to Healthy Subjects Under Fasted Conditions..... 63**

601

602

603

**Figure 6. Morning Cortisol Measurements in the Vamorolone Phase I Healthy  
Subjects ..... 66**

604

605

**Figure 7. Fasting Serum Glucose During the Phase I MAD Period (Two Weeks  
Daily Treatment)..... 67**

606

607

**Figure 8 Mean Plasma Concentrations of Vamorolone after Once Daily Oral  
Administration of 0.25, 0.75, 2.0, and 6.0 mg/kg Doses ..... 70**

608

609

**Figure 9 Regression Analysis of C<sub>max</sub> and AUC<sub>inf</sub> versus Dose ..... 72**

610  
611

## LIST OF ABBREVIATIONS

| <b>Abbreviation</b>   | <b>Definition/Term</b>                                                                                   |
|-----------------------|----------------------------------------------------------------------------------------------------------|
| %CV                   | percent coefficient of variation                                                                         |
| ACTH                  | adrenocorticotrophic hormone                                                                             |
| ADL                   | activities of daily living                                                                               |
| AE                    | adverse event                                                                                            |
| ALP                   | alkaline phosphatase                                                                                     |
| ALT                   | alanine aminotransferase                                                                                 |
| AST                   | aspartate aminotransferase                                                                               |
| AUC                   | area under the concentration-time curve                                                                  |
| AUC <sub>0-24hr</sub> | area under the concentration-time curve from time 0 to 24 hours                                          |
| AUC <sub>(0-t)</sub>  | area under the concentration-time curve from time 0 to time t                                            |
| AUC <sub>(inf)</sub>  | area under the concentration-time curve from time 0 to infinity                                          |
| AUC <sub>last</sub>   | area under the plasma concentration-time curve from time 0 to the last observed measurable concentration |
| BMI                   | body mass index                                                                                          |
| BUN                   | blood urea nitrogen                                                                                      |
| C                     | Celsius                                                                                                  |
| CFR                   | Code of Federal Regulations                                                                              |
| CINRG                 | Cooperative International Neuromuscular Research Group                                                   |
| CK                    | creatine kinase                                                                                          |
| CL                    | clearance                                                                                                |
| ConA                  | Concanavalin A                                                                                           |
| cm                    | centimeter                                                                                               |
| C <sub>max</sub>      | maximum observed plasma concentration                                                                    |
| CTCAE                 | Common Terminology Criteria for Adverse Events                                                           |
| CTM                   | Clinical Trial Material                                                                                  |
| CTMS                  | Clinical Trial Management Software                                                                       |
| CTX1                  | C-terminal peptide fragment of collagen 1                                                                |
| CYP                   | cytochrome P450                                                                                          |
| dL                    | deciliter                                                                                                |
| DMD                   | Duchenne muscular dystrophy                                                                              |
| DNA                   | deoxyribonucleic acid                                                                                    |
| DSMB                  | Data and Safety Monitoring Board                                                                         |
| DXA                   | dual-energy x-ray absorptiometry                                                                         |



612  
613

| <b>Abbreviation</b> | <b>Definition/Term</b>                              |
|---------------------|-----------------------------------------------------|
| ECG                 | electrocardiogram                                   |
| eCRF                | electronic case report form                         |
| EDC                 | electronic data capture                             |
| EMA                 | European Medicines Agency                           |
| EU                  | European Union                                      |
| F%                  | percent bioavailability                             |
| FDA                 | Food and Drug Administration                        |
| GALT                | gut-associated lymphoid tissue                      |
| GCP                 | Good Clinical Practice                              |
| GGT                 | gamma glutamyl transferase                          |
| GLDH                | glutamate dehydrogenase                             |
| GLP                 | Good Laboratory Practice                            |
| HbA1c               | hemoglobin A1c                                      |
| HDL                 | high density lipoprotein                            |
| HEENT               | head, eyes, ears, nose and throat                   |
| HIPAA               | Health Insurance Portability and Accountability Act |
| hr                  | hour                                                |
| ICF                 | Informed Consent Form                               |
| ICH                 | International Conference on Harmonisation           |
| ID                  | identification                                      |
| IEC                 | Independent Ethics Committee                        |
| IND                 | Investigational New Drug                            |
| IRB                 | Institutional Review Board                          |
| IXRS                | Interactive Voice/Web Response System               |
| kg                  | kilogram                                            |
| L                   | liter                                               |
| LLC                 | Limited Liability Company                           |
| LDH                 | lactate dehydrogenase                               |
| LDL                 | low density lipoprotein                             |
| LS                  | least squares                                       |
| µg                  | microgram                                           |
| m                   | meter                                               |
| m <sup>2</sup>      | square meter                                        |
| MAD                 | multiple ascending dose (study)                     |
| MCMC                | Markov Chain Monte Carlo                            |

614  
615

| <b>Abbreviation</b> | <b>Definition/Term</b>                                                                                                       |
|---------------------|------------------------------------------------------------------------------------------------------------------------------|
| MD                  | Medical Doctor (physician)                                                                                                   |
| <i>Mdx</i>          | mouse model lacking dystrophin                                                                                               |
| MedDRA              | Medical Dictionary for Regulatory Activities                                                                                 |
| mg                  | milligram                                                                                                                    |
| Min                 | minute                                                                                                                       |
| mITT                | modified Intent-to-Treat                                                                                                     |
| mL                  | milliliter                                                                                                                   |
| MMRM                | mixed model for repeated measures                                                                                            |
| MTD                 | maximum tolerated dose                                                                                                       |
| N, No.              | number                                                                                                                       |
| NADPH               | nicotinamide adenine dinucleotide phosphate                                                                                  |
| NCA                 | non-compartmental analysis                                                                                                   |
| NF-κB               | nuclear factor kappa-light-chain-enhancer of activated B cells                                                               |
| ng                  | nanogram                                                                                                                     |
| nM                  | nanomolar                                                                                                                    |
| nmol                | nanomole                                                                                                                     |
| NOAEL               | no observed adverse effect level                                                                                             |
| NSAA                | North Star Ambulatory Assessment                                                                                             |
| OTC                 | over-the-counter (non-prescription medication)                                                                               |
| oz                  | ounce                                                                                                                        |
| P1NP                | serum aminoterminal propeptide of type I collagen                                                                            |
| PARS III            | Personal Adjustment and Role Skills Scale III                                                                                |
| PBL                 | peripheral blood leukocytes                                                                                                  |
| PD                  | pharmacodynamics                                                                                                             |
| PHI                 | Protected Health Information                                                                                                 |
| PK                  | pharmacokinetics                                                                                                             |
| PODCI               | Pediatric Outcomes Data Collection Instrument                                                                                |
| PPP                 | Per Protocol Population                                                                                                      |
| PR [PQ]             | time from onset of P wave to start of the QRS complex                                                                        |
| QD                  | once daily (dosing)                                                                                                          |
| QRS                 | in electrocardiography, the complex consisting of Q, R, and S waves, corresponding to depolarization of ventricles [complex] |
| QSAR                | quantitative structure-activity relationship                                                                                 |
| QT                  | in cardiology, the time between the start of the Q wave and end of the T wave                                                |
| QT <sub>c</sub>     | corrected QT interval                                                                                                        |

616  
617

| <b>Abbreviation</b> | <b>Definition/Term</b>                                                              |
|---------------------|-------------------------------------------------------------------------------------|
| RBC                 | Red Blood Cell                                                                      |
| REML                | restricted maximum likelihood                                                       |
| ROM                 | Range of Motion                                                                     |
| RR                  | in electrocardiography, the interval between successive Rs (peaks of QRS complexes) |
| 6MWT                | Six-minute Walk Test                                                                |
| SAD                 | single ascending dose (study)                                                       |
| SAE                 | serious adverse event                                                               |
| SAP                 | statistical analysis plan                                                           |
| SD                  | standard deviation                                                                  |
| SOC                 | system organ class                                                                  |
| SOP                 | standard operating procedures                                                       |
| SSC                 | Study Steering Committee                                                            |
| SUSAR               | Suspected Unexpected Serious Adverse Reaction                                       |
| $t_{1/2}$           | terminal half-life                                                                  |
| TEAE                | treatment-emergent adverse event                                                    |
| $T_{max}$           | time to maximum observed plasma concentration                                       |
| TRiNDS              | Therapeutic Research in Neuromuscular Disorders Solutions                           |
| TSQM                | Treatment Satisfaction Questionnaire for Medication                                 |
| TTCLIMB             | Time to Climb (Test)                                                                |
| TTSTAND             | Time to Stand (Test)                                                                |
| TTRW                | Time to Run/Walk (Test)                                                             |
| ULN                 | upper limit of normal                                                               |
| US                  | United States                                                                       |
| vol                 | volume                                                                              |
| vs.                 | versus                                                                              |
| $V_{ss}$            | volume of distribution at steady state                                              |
| WBC                 | White Blood Cell                                                                    |
| WHO                 | World Health Organization                                                           |
| wt                  | weight                                                                              |

618

619

## 1 INTRODUCTION

620

621

### 1.1 Background and Unmet Need

622

623

Duchenne muscular dystrophy (DMD) is a rapidly progressive form of muscular dystrophy that occurs primarily in males and manifests prior to the age of six years. Duchenne muscular dystrophy affects approximately 1 in 3,600 to 9,300 male births worldwide.<sup>1</sup> Duchenne muscular dystrophy is caused by mutations in the dystrophin gene which codes for a protein that provides structural stability to the dystroglycan complex on muscle cell membranes.<sup>2</sup> The lack of dystrophin reduces plasma membrane stability. Membrane destabilization results in altered mechanical properties and aberrant signaling, which contribute to membrane fragility, necrosis, inflammation, and progressive muscle wasting.<sup>3</sup>

632

633

634

635

636

637

638

639

640

In addition to the significant contribution of membrane destabilization and mechanical injury in DMD, aberrant intracellular signaling cascades that regulate inflammatory and immune processes also contribute to DMD pathophysiology. Up-regulated inflammatory gene expression and activated immune cell infiltrates, at least partially mediated by nuclear factor kappa-light-chain-enhancer of activated B cells (NF-κB) activation, are evident during early disease stages and play a significant role in muscle wasting.<sup>3</sup> NF-κB has been shown to regulate the expression of numerous inflammatory genes in immune cells and muscle fibers,<sup>4,5,6,7</sup> and the infiltration and activation of these cells can trigger muscle fiber death.<sup>8,9</sup>

641

642

643

644

645

646

647

648

649

Although significant advances have been made in understanding the etiology of DMD, a cure has not been found, and until recently treatment options were medications used “off-label” to alleviate the symptoms of DMD. Despite scientific advances, only glucocorticoids, such as prednisone or deflazacort, have consistently demonstrated efficacy in clinical trials.<sup>10</sup> Indeed, the United States Food and Drug Administration (US FDA) recently approved deflazacort as a treatment for DMD. Further, many disease modifying technologies that are currently in development focus on subsets of dystrophin mutations and therefore do not address the unmet need in all persons with DMD. However, it is likely that glucocorticoids will need to be co-administered with many of

650

651 these compounds for maximum effect and glucocorticoids have extensive side effect  
652 profiles, often limiting long-term administration. The current goal of DMD research is to  
653 find a mutation-independent treatment that matches or exceeds the efficacy of  
654 glucocorticoids with a significantly lower side effect profile.

655 Vamorolone is a first generation delta-9, 11 chemical compound belonging to the  
656 structural class of synthetic steroidal drugs, which includes the glucocorticoids  
657 prednisone, prednisolone, methylprednisolone, and dexamethasone.<sup>11</sup> The chemical  
658 structure of vamorolone has optimized four subactivities of traditional glucocorticoid  
659 drugs, namely transactivation, transrepression, physiochemical membrane properties, and  
660 mineralocorticoid receptor antagonism.<sup>11</sup> By reducing transactivation subproperties,  
661 retaining transrepression, imparting membrane stabilizing properties, and inhibiting the  
662 mineralocorticoid receptor pathway, vamorolone has favorable efficacy and side effect  
663 profiles relative to classic glucocorticoids in nonclinical models and is anticipated to be  
664 an attractive candidate for the treatment of DMD in pediatric patients.

665 *In vitro* and nonclinical data to date suggest that vamorolone may offer a much needed  
666 alternative to the current glucocorticoids which are standard of care for DMD<sup>12</sup> with  
667 administration beginning around the age of 5 years in most developed countries, or even  
668 earlier in some cases.

669 The significant effects of glucocorticoids on growth and development, however, prevent  
670 their routine administration in infancy or ‘toddler’ years, despite evidence that the earlier  
671 the administration, the better the overall functional outcome.<sup>13</sup> The cumulative adverse  
672 effects of glucocorticoids, including excess weight, delayed puberty, fragile skin, loss of  
673 bone mineral density, bruising, and cushingoid appearance continue to negatively impact  
674 on the quality of life of the individual, leading to significant variations in clinical  
675 practice.<sup>14</sup> Glucocorticoids also contribute to further muscle damage with long-term  
676 administration. Vamorolone has shown few if any of the adverse effects of traditional  
677 glucocorticoids in mouse models of DMD.<sup>11,15,16</sup>

678 This study is targeted to explore whether vamorolone will show at least equal efficacy to  
679 glucocorticoids with a more favorable adverse effect profile, thereby improving the

680

681 quality of life for DMD patients. This profile would enable use of vamorolone in DMD  
682 boys at a younger age than when glucocorticoid treatment is currently initiated. In  
683 addition, vamorolone could be prescribed in later stage non-ambulant young men with  
684 DMD and for a longer period of time, where the risk:benefit balance of glucocorticoids is  
685 often less favorable.

686 Efficacy may also be improved over classic glucocorticoids in the longer term. In  
687 addition to the anti-inflammatory properties of vamorolone as a result of NF- $\kappa$ B pathway  
688 inhibition, vamorolone may also improve efficacy over conventional glucocorticoids due  
689 to the lack of interference in the AKT1/FOXO pathway, a key feature of glucocorticoid  
690 therapy which leads in the long term to muscle wasting and atrophy.<sup>17</sup> Further,  
691 vamorolone has been recently demonstrated to improve asynchronous remodeling,  
692 believed to be a component of progressive muscle weakness and wasting in DMD<sup>18</sup> and  
693 may also prevent muscle membrane damage, thereby delaying progression of the disease  
694 further. Vamorolone is an antagonist to the mineralocorticoid receptor, whereas  
695 glucocorticoids are typically agonists. An antagonist for the mineralocorticoid receptor,  
696 epleronone, was recently shown to significantly improve DMD heart function.<sup>19</sup> Finally,  
697 vamorolone imparts physical stability to myofiber plasma membranes, whereas  
698 prednisolone destabilizes membranes. This property addresses the primary defect of  
699 membrane instability in dystrophin deficient myofibers in DMD.<sup>15</sup>

700 Potentially, the administration of vamorolone to a DMD patient may begin soon after  
701 birth to slow the dystrophic process of muscle, retaining regenerative capacity and  
702 substantially improving patient quality of life.

## 703 **1.2 Nonclinical Experience**

704  
705 The safety pharmacology, pharmacokinetics (PK) and metabolism, and toxicology of  
706 vamorolone have been evaluated in multiple nonclinical studies *in vitro* and in mice, rats,  
707 beagle dogs, and cynomolgus monkeys *in vivo*.

708 All Good Clinical Laboratory (GLP) studies were conducted in, or inspected by, a  
709 country that has implemented the Organisation for Economic Cooperation and  
710 Development (OECD) Mutual Acceptance of Data (MAD) system.

711

712 **1.2.1 Safety Pharmacology**

713

714 Stunted growth is a significant side effect of chronic glucocorticoid use in children.<sup>20,21</sup>

715 Chronic treatment with glucocorticoids negatively affects bone growth and development  
716 and can cause osteoporosis.<sup>22,23</sup>

717 The effect of vamorolone as compared to prednisolone on bone growth and development  
718 was evaluated in the *mdx* mouse model of DMD that lacks dystrophin due to a premature  
719 chain-terminating mutation in the mouse homologue of the dystrophin gene. In the pre-  
720 symptomatic *mdx* study, tibia length was measured to determine if vamorolone inhibited  
721 bone growth. Prednisolone significantly decreased tibia length whereas vamorolone did  
722 not affect tibia length at any concentration tested. Micro-computed tomography was  
723 performed on femurs to examine bone density and structure. Comparison of vehicle,  
724 prednisolone, and the highest vamorolone dose showed prednisolone to significantly  
725 reduce trabecular thickness compared to vehicle, while vamorolone did not.<sup>15</sup>

726 In normal, male CD-1<sup>®</sup> mice, these effects were reproduced. Unlike CD-1 mice treated  
727 with prednisolone, CD-1 mice receiving vamorolone did not experience tibia length  
728 shortening.<sup>16</sup> However, at the highest vamorolone dose tested, mice did have  
729 significantly reduced body length, though to a lesser extent as compared to prednisolone.

730 Duchenne muscular dystrophy is associated with cardiomyopathy that can become life  
731 threatening, and increased fibrosis with prednisolone treatment in heart muscle of the  
732 *mdx* mouse has been reported.<sup>24</sup> Histologically, clear fibrosis was evident in 50% of  
733 young (8-week) prednisolone-treated mouse hearts compared to no incidence of fibrosis  
734 identified in the other groups (wild type; *mdx* vehicle, and vamorolone-treated).

735 Pharmacologically, glucocorticoids show immunosuppressive and immunotoxic  
736 properties that limit therapeutic windows and long-term use. Vamorolone (5, 15,  
737 30 mg/kg/day) was benchmarked against prednisolone (5 mg/kg/day) to determine if  
738 similar properties were observed.<sup>15</sup> Untreated *mdx* mice showed increased numbers of  
739 peripheral blood leukocytes (PBL) and enlarged spleens resulting from ongoing muscle  
740 damage compared to wild type mice. Vamorolone treatment reduced spleen mass and  
741 PBL counts in a dose-dependent manner. This finding is attributed to a reduction in

742

743 muscle damage by vamorolone that decreases spleen size to levels resembling those in  
744 wild type mice. Prednisolone reduced these measures below wild type, suggesting  
745 immunosuppressive and/or immunotoxic properties. Further, prednisolone significantly  
746 decreased viable splenocytes per gram of tissue ( $p < 0.005$ ), whereas this decrease was not  
747 observed for any vamorolone dose tested (ReveraGen Report No.  
748 MDX-RBP-VBP15-02).<sup>15</sup>

749

750 To further query the potential immune modulation, the effects of vamorolone and  
751 prednisolone on counts of splenic B and T-lymphocytes isolated from treated *mdx* mice  
752 were examined. CD4+ T-cell activation was assayed by stimulation of splenocytes with  
753 the T-cell mitogen, concanavalin A (ConA). Splenocytes obtained from prednisolone-  
754 treated mice displayed a significant reduction of the percentage of splenic activated  
755 CD4+CD25+ T-cells upon ConA stimulation while splenocytes derived from  
756 vamorolone-treated mice did not (ReveraGen Report No. MDX-RBP-VBP15-02).

757 Taken together, these findings suggest that while prednisolone treatment leads to a  
758 reduction in T-cell number and activation status, vamorolone modulates inflamed *mdx*  
759 immune systems towards a wild type state without compromising T-cell activation status.

## 760 ***1.2.2 Pharmacokinetics and Metabolism***

### 761 ***Single Dose***

762 Vamorolone PK profiles were determined in male CD-1 mice, Sprague Dawley rats and  
763 beagle dogs after a single intravenous injection of 10 mg/kg and after a single oral dose  
764 of 50 mg/kg in mice and rats and 30 mg/kg in dogs.

765 Pharmacokinetic results for vamorolone following a single intravenous administration of  
766 10 mg/kg in Crl:CD1(ICR) mice demonstrated a clearance (CL) of 18.8 mL/min/kg. The  
767 terminal half-life ( $t_{1/2}$ ) was 0.35 hours. Volume of distribution at steady state ( $V_{ss}$ ) was  
768 0.76 L/kg. Following oral administration of 50 mg/kg in mice, the maximum observed  
769 plasma concentration ( $C_{max}$ ) of 6787 ng/mL was observed at 2 hours (time to maximum  
770 observed plasma concentration [ $T_{max}$ ]) after drug administration, and percent  
771 bioavailability (F%) was 74.5%. Following oral administration of 15 mg/kg via cherry



772

773 syrup, the  $C_{max}$  of 1527 ng/mL was observed at 2 hours after drug administration and  
774 bioavailability was 47.7% (ReveraGen Report No. PH-DPMK-VBP-10-004).

775 Pharmacokinetic results for vamorolone following a single intravenous administration of  
776 50 mg/kg in Sprague Dawley rats indicated a CL of 20.2 mL/min/kg. The  $t_{1/2}$  was  
777 0.58 hours.  $V_{ss}$  was 0.77 L/kg, which was similar to that observed in mice. After oral  
778 administration of 50 mg/kg in rats, a  $C_{max}$  of 2543 ng/mL was observed at 4 hours after  
779 dose administration, and bioavailability was 47.8% (ReveraGen Report No. PH-DPMK-  
780 VBP-10-007).

781 In beagle dogs, vamorolone had a CL of 24.7 mL/min/kg. The  $t_{1/2}$  was 5.42 hours and  $V_{ss}$   
782 was 1.93 L/kg. After oral administration of 30 mg/kg in dogs, a  $C_{max}$  of 814 ng/mL was  
783 observed at 6 hours after dose administration and bioavailability was 53.2% (ReveraGen  
784 Report No. 48504-10-464).

785 Vamorolone clearance was therefore comparable in all 3 species studied  
786 (19-25 mL/min/kg). Bioavailability ranged from approximately 50% in mouse (cherry  
787 syrup), rat, and dog to 75% in the mouse (30% Labrafil) (ReveraGen Report Nos.  
788 PH-DPMK-VBP-10-004, PH-DPMK-VBP-10-007, 48504-10-464).

789

### 790 ***Multiple Dose***

791

792 Crl:CD1(ICR) mice were administered vamorolone or vehicle once daily (QD) for  
793 28 consecutive days. Vamorolone exposure (as assessed by the  $C_{max}$  and area under the  
794 plasma concentration-time curve from time 0 to the last observed measurable  
795 concentration [ $AUC_{last}$ ]) increased with increasing dose on Study Days 1 and 28.

796 Repeated dosing of vamorolone over a 28-day duration was associated with decreases in  
797 mean vamorolone  $AUC_{last}$  values in the 30 and 100 mg/kg dose groups compared to  
798 Day 1, indicating possible enzyme induction. On Study Day 28, mean  $AUC_{last}$  values  
799 were 1.81-fold and 5.02-fold lower compared to Study Day 1 for the 30 and 100 mg/kg  
800 dose groups, respectively. The observed difference in exposure relative to Day 1  
801 increased with the increase in administered dose of vamorolone (ReveraGen Report No.  
802 1998-009).

803

804 Beagle dogs were either administered vamorolone or vehicle QD for 28 consecutive days.  
805 Vamorolone exposure in dogs (as assessed by  $C_{max}$  and  $AUC_{last}$ ) generally increased with  
806 increasing dose on Study Days 1 and 28. For the 2 and 10 mg/kg dose groups, exposure  
807 on Day 28 was generally higher than on Day 1, indicating possible inhibition of  
808 metabolism of vamorolone at these dose levels. On Day 28, mean  $AUC_{last}$  values were  
809 2.35-fold and 2.43-fold (males) and 3.03-fold and 3.23-fold (females) higher compared to  
810 Study Day 1 for the 2 and 10 mg/kg/day dose groups, respectively. For the 50 mg/kg  
811 dose group, exposure on Day 28 was similar to that on Day 1. At the 50 mg/kg dose,  
812  $AUC_{last}$  values in males were 1.71-fold lower whereas females were 1.22 higher on  
813 Day 28 compared to Day 1 (ReveraGen Report No. 031302).

814

815 Beagle dogs were administered vehicle or vamorolone at doses of 2 mg/kg/day,  
816 10 mg/kg/day, or 50 mg/kg/day for 39 weeks. Systemic exposure (area under the plasma  
817 concentration-time curve from time 0 to 24 hours [ $AUC_{0-24hr}$ ]) to vamorolone appeared to  
818 be independent of sex. Mean  $AUC_{0-24hr}$  and  $C_{max}$  values for vamorolone increased with  
819 increasing dose in an approximately dose proportional manner on Days 1 and 270. Mean  
820 systemic exposure ( $AUC_{0-24hr}$ ) to vamorolone appeared to increase following repeated  
821 administration of vamorolone. Due to the alterations in the feeding regimen, changes in  
822 systemic exposure following repeated administration should be viewed with caution due  
823 the influence of feeding on exposure. For the 2 and 10 mg/kg/day dose groups, exposure  
824 on Day 270 was generally higher than on Day 1, indicating possible inhibition of  
825 metabolism of vamorolone at these dose levels. On Day 270, mean  $AUC_{0-24hr}$  values  
826 were 2.34-fold and 2.98-fold higher compared to Study Day 1 for the 2 and 10 mg/kg/day  
827 dose groups, respectively. For the 50 mg/kg dose group, exposure on Day 270 was  
828 2.07-fold higher compared to that on Day 1 (ReveraGen Report No. 1998-014).

829

830 Non-naïve cynomolgus monkeys were administered vamorolone (300 and  
831 600 mg/kg/day) or vehicle once daily for 7 consecutive days. Vamorolone exposure (as  
832 assessed by  $C_{max}$  and  $AUC_{last}$ ) generally increased with increasing dose on Study Days 1  
833 and 7 with the exception of male monkeys on Day 7, which showed no clear increase in  
834 exposure between the 300 and 600 mg/kg/day dose levels. Repeated dosing over the

835

836 7-day study duration was associated with decreases in mean plasma vamorolone AUC<sub>last</sub>  
837 values for female and male monkeys indicating possible metabolic induction. On Day 7,  
838 mean AUC<sub>last</sub> values were 1.60-fold, 2.19-fold, and 2.02-fold lower in females and  
839 1.20-fold, 2.09-fold, and 2.88-fold lower in males compared to Study Day 1 for the 100,  
840 300 and 600 mg/kg/day dose groups, respectively (ReveraGen Report Nos. 1998-001,  
841 SW11-0418).

842 ***Distribution***

843

844 In the plasma protein binding studies, percent bound was similar in human and mouse  
845 cells in culture (88.06% and 86.71%, respectively). In the blood partition experiment  
846 done *ex vivo*, the blood to plasma ratio was similar between human and mouse (0.87 and  
847 0.68, respectively), but the red blood cell to plasma ratio for the mouse (0.33) was less  
848 than half that of the human (0.74). Human *in vivo* data are presented in [Section 1.3](#)  
849 (VBP15-001). In the blood/brain concentration mouse experiment *in vivo*, the plasma  
850 concentrations of vamorolone were higher than brain concentrations with the area under  
851 the plasma concentration-time curve (AUC) and C<sub>max</sub> approximately 2-fold higher in  
852 plasma than in brain (ReveraGen Report Nos. ADME-NCG-PPB-NC135, ADME-VBP-  
853 PPB-V002, ADME-NCG-BP-NC134, NCATS 2013-38).

854 ***Metabolism***

855

856 The *in vitro* and *in vivo* data demonstrate that vamorolone can be metabolized via  
857 multiple metabolic pathways, including glucuronidation, hydroxylation, and reduction.  
858 Glucuronidation appeared to be the major metabolic pathway in human cells *in vitro*. All  
859 metabolites observed in human *in vitro* were observed in monkey *in vitro*. Most human  
860 metabolites identified *in vitro* were also found in mouse and dog. Thus, there is no  
861 unique human metabolite identified for vamorolone.

862 The metabolic stability of vamorolone was assessed in non-Good Laboratory Practice  
863 (GLP) studies. Based on the data generated, vamorolone was highly stable for up to  
864 60 minutes in human, monkey, dog, and mouse liver microsomes in the presence or  
865 absence of nicotinamide adenine dinucleotide phosphate (NADPH) and stable for up to  
866 60 minutes in rat liver in the absence of NADPH. Moderate metabolism was apparent in

867  
868 rat liver microsomes in the presence of NADPH stimulation (35% remaining), suggesting  
869 that rat was a high metabolizer of vamorolone relative to other species (mouse, dog,  
870 human) (ReveraGen Report Nos. NIH-R2526, and ADME-VBP-LM-V003).

871 Vamorolone did not significantly inhibit any of the cytochrome P450 (CYP) enzyme  
872 isoforms tested (CYP 1A2, 2B6, 2C8, 2C9, 2C19, 2D6, and 3A4). Vamorolone  
873 moderately induced CYP3A4 (24% to 42%), indicating that vamorolone is a potential  
874 inducer of CYP3A4 (ReveraGen Report Nos. ADME-VBP-Inhibition-V005, ADME-  
875 VBP-Induction-V006, ADME-VBP-Induction-V009).

### 876 *Excretion*

877  
878 Vamorolone showed high plasma clearance in rats but, consistent with the extensive  
879 metabolism in hepatocytes from this species, the biliary and urinary excretion of the  
880 parent compound was low with an average of <0.05% of the dose recovered in bile and  
881 approximately 0.1% in urine. Overall, vamorolone showed high plasma clearance and  
882 extremely low biliary and urinary excretion (ReveraGen Report No. NCATS 2013-44).

### 883 *1.2.3 Toxicology*

#### 884 *Single Dose*

885 Crl:CD1(ICR) mice were administered vamorolone once via oral gavage at 50, 125, 250,  
886 and 500 mg/kg and observed for abnormalities. All animals survived to their scheduled  
887 termination, and there were no significant abnormalities observed. However, a slight  
888 decrease in body weight related to vamorolone was observed in males and females at  
889 doses above 125 mg/kg. A dose dependent decrease in food consumption related to  
890 vamorolone was also observed in males and females. There were no other clinical  
891 observations (ReveraGen Report No. 1998-002).

892 Beagle dogs received single 60, 180, 360, and 750 mg/kg doses of vamorolone using an  
893 escalation study design with a 4-day washout period between doses. All animals  
894 survived dose escalation. Clinical signs attributed to vamorolone (750 mg/kg) included  
895 red discoloration of the ears and face. This effect occurred within a few hours of dosing  
896 and was transient. The highest dose also resulted in increased white blood cell count

897  
898 (increased neutrophils and monocytes [female only] and decreased lymphocytes and  
899 eosinophils [male and female]). At the 360 and 750 mg/kg dose levels, slight elevations  
900 in albumin were observed. A mild elevation in cholesterol at the 750 mg/kg (and  
901 possibly 360 mg/kg) dose level was also observed (ReveraGen Report No. 13788.01.01).  
902 In cynomolgus monkeys, single oral doses of up to 500 mg/kg were well tolerated with  
903 no significant clinical observations (ReveraGen Report No. 1998-001).

904 ***Multiple Dose***

905  
906 Acute Toxicity Studies

907 Vamorolone or vehicle was administered to Crl:CD1(ICR) mice QD for 28 consecutive  
908 days at doses of 10, 30 and 100 mg/kg/day. All animals survived to their scheduled  
909 necropsy with the exception of a female mouse (100 mg/kg/day dose group) that was  
910 found dead on Day 16. The cause of death was considered incidental and attributed to a  
911 dosing injury based on the amount of red fluid in the thoracic cavity.

912 No effects attributable to vamorolone were observed on clinical observations, food  
913 consumption, ophthalmic examination, or urinalysis during the study. A dose-dependent  
914 decrease in body weight gain was observed at all doses; however, weight was fully  
915 regained during the recovery period. Adrenal gland weights were variable between  
916 groups and generally decreased, but without a dose response relationship, and correlated  
917 microscopically with minimal to moderate vacuolar degeneration and cortical atrophy.  
918 After the 2-week recovery period there was evidence of vacuolar degeneration. Liver  
919 weights were significantly increased at the 100 mg/kg/day dose level. Hepatocellular  
920 hypertrophy, increased vacuolation, and necrosis (single cell) were seen in a few male  
921 mice at 30 mg/kg/day. There was evidence of lipid and glycogen accumulation. Serum  
922 alanine aminotransferase and aspartate aminotransferase levels were higher with  
923 associated microscopic hypertrophy/vacuolation/necrosis at 100 mg/kg/day. Spleen  
924 weights decreased in a dose-dependent manner and correlated with a decreased number  
925 of lymphocytes in spleen. Thymus weights decreased in a dose dependent manner and  
926 were associated microscopically with lymphoid atrophy. Mice had dose-dependent  
927 reductions in serum lymphocytes which were significant in the 100 mg/kg dose group.

928

929 After the recovery period, all parameters returned to normal (untreated) except for  
930 thymus weights, which were increased.

931 Based on the liver-related findings in this study, the no observed adverse effect level  
932 (NOAEL) for vamorolone in mice is 30 mg/kg/day (ReveraGen Report No. 1998-009).

933 Vamorolone or vehicle was administered to beagle dogs QD for 28 consecutive days at  
934 doses of 2, 10 and 50 mg/kg/day. All animals survived to their scheduled termination  
935 and no effect of vamorolone was noted on body weight, body temperature, food  
936 consumption, ophthalmology, electrocardiography, macroscopic, or urinalysis parameters  
937 at necropsy. A dose-dependent decrease in body weight gain was observed at all doses  
938 but weights generally returned to normal during the recovery period.

939 Adrenal gland weights decreased which correlated with mild or moderate diffuse bilateral  
940 atrophy of the adrenal cortex, mild multifocal bilateral vacuolation of the adrenal cortex,  
941 increased white blood cell and neutrophil counts, and decreased eosinophil counts. Liver  
942 weights increased in the 50 mg/kg/day dose group, which correlated with diffuse  
943 hypertrophy and vacuolation and increased levels of alkaline phosphatase and gamma  
944 glutamyltransferase. Spleen weights decreased, which correlated with lymphoid  
945 depletion. Thymus weights decreased, which corresponded to diffuse lymphoid  
946 depletion. With the exception of diffuse depletion of lymphocytes in thymus in the  
947 50 mg/kg group, all abnormal parameters returned to normal during the recovery period.

948

949 The NOAEL was considered by the study director to be 10 mg/kg/day. Although  
950 reversible, the liver changes were considered adverse at 50 mg/kg/day because the  
951 severity score was moderate and the changes were diffuse in nature in all animals treated  
952 at the high dose. This is in contrast to the conclusion drawn by the study pathologist,  
953 who considered the NOAEL to be 50 mg/kg/day due to reversibility following cessation  
954 of dosing (ReveraGen Report No. 31302).

955 Non-naive cynomolgus monkeys were administered vamorolone or vehicle QD for  
956 7 consecutive days at doses of 100, 300, and 600 mg/kg. All animals survived until the  
957 end of the study period. There were effects on clinical observations, food consumption,  
958 and urinalysis attributable to vamorolone.

959

960 There was a dose proportional decrease in body weight gain observed in males and  
961 females at each dose (up to 11% and 9% respectively) related to vamorolone. A  
962 cessation of the body weight loss in treatment was observed during the recovery phase  
963 but no recovery of body weight lost during the 7 days of dosing was observed.

964 At termination there were non-significant increases in red cell mass and decreases in  
965 lymphocytes (up to 56%) in the 600 mg/kg/day dose group. However, most individual  
966 animals, including controls, had decreases in lymphocytes (up to 81%) at termination  
967 relative to their respective pretest. They had resolved by the recovery interval in both  
968 sexes.

969 In both sexes receiving  $\geq 300$  mg/kg/day, there was increased urea nitrogen (up to 141%),  
970 creatinine (up to 58%), total protein (up to 15%), albumin (up to 11%), globulin (up to  
971 25%), and/or potassium (up to 39%) with concurrent decreases in sodium (up to 10%)  
972 and chloride (up to 10%) relative to controls. At the recovery interval, the majority of  
973 these effects had resolved (ReveraGen Report No. 1998-001).

974 Chronic toxicity studies  
975

976 26-week chronic toxicity study in mice  
977

978 A 26-week chronic toxicity study was carried out in Crl:CD1®(ICR) mice to evaluate the  
979 reversibility, progression, or delayed appearance of any observed changes following a  
980 4-week postdose observation period. Doses of vamorolone tested were 5, 15, and  
981 45 mg/kg/day. Assessment of toxicity was based on mortality, clinical observations,  
982 body weight, and food consumption; ophthalmoscopic examinations; and clinical and  
983 anatomic pathology. Toxicokinetic assessment was conducted for the test article.

984 There were no vamorolone-related effects on mortality, detailed clinical observations,  
985 food consumption, ophthalmology, sperm evaluations, or bone lengths (femur or tibia).

986 Five test article-treated mice were unscheduled deaths (euthanized *in extremis* or found  
987 dead) during the dosing phase. Three of these were considered to be potentially due to  
988 dosing injury based on microscopic findings in mediastinum, epicardium, or lung. One  
989 of these unscheduled deaths was attributed to moderate progressive nephropathy; a

990

991 spontaneous background finding. The death of one male at 5 mg/kg/day was  
992 undetermined since there were no major pathologic findings to explain the unscheduled  
993 death of this animal; there was no target organ toxicity in the mouse. Target organ  
994 toxicity was not considered a contributor to the death of these animals and there was no  
995 dose-relationship in incidence.

996 A vamorolone-related increase in body weight gain was observed relative to controls in  
997 males (+14%) and females (+23%) at 45 mg/kg/day. Increases in body weights at  
998 45 mg/kg/day were not considered to be adverse due to the general health of the animals  
999 overall. During the recovery phase, bodyweights in males returned to comparable levels  
1000 with controls, however female body weights remained increased compared to female  
1001 controls.

1002 Evidence of a minimal to mild vamorolone-related hepatic effects were observed in males  
1003 at  $\geq 5$  mg/kg/day and females at 45 mg/kg/day, indicated by mild to moderate increases  
1004 in alkaline phosphatase, alanine aminotransferase, aspartate aminotransferase activities,  
1005 and/or total bilirubin, as related to microscopic hepatocellular vacuolation, inflammation,  
1006 and/or necrosis in males at  $\geq 15$  mg/kg/day and females at 45 mg/kg/day; these changes  
1007 had generally resolved at recovery collections with the exception of minimal increases in  
1008 alanine aminotransferase activity in females at 45 mg/kg/day, which may have correlated  
1009 to microscopic liver pathology.

1010 A mild vamorolone-related increase in neutrophil counts was observed in both sexes at  
1011 45 mg/kg/day with concurrent decreases in lymphocyte counts in females at  
1012 45 mg/kg/day consistent with a glucocorticoid-like effect, as related to microscopic  
1013 lymphoid depletion, although an inflammatory stimulus may have contributed to  
1014 increases in neutrophil counts, as related to microscopic liver inflammation; these  
1015 changes had generally resolved at recovery collections.

1016 A mild vamorolone-related decrease in chloride was observed in males at  $\geq 5$  mg/kg/day  
1017 and females at  $\geq 15$  mg/kg/day that lacked correlative findings among other study  
1018 endpoints; resolution for this endpoint could not be determined.



1019

1020 A mild vamorolone-related increase in albumin was observed in males at  $\geq 5$  mg/kg/day  
1021 and females at 45 mg/kg/day with concurrent mild increases in globulin in females at  
1022 45 mg/kg/day; these changes had resolved at recovery collections.

1023 A minor vamorolone-related alteration in lipid metabolism was observed in both sexes at  
1024 45 mg/kg/day and females at 15 mg/kg/day indicated by increases in triglyceride and/or  
1025 cholesterol; these changes had resolved at recovery collections.

1026 Vamorolone-related macroscopic findings occurred in the liver of mice at 45 mg/kg/day.  
1027 Tan discoloration occurred in one female and four males at this dose in the dosing phase.  
1028 This correlated with microvesicular/macrovesicular hepatocyte vacuolation. There were  
1029 no test article-related macroscopic findings in recovery animals.

1030 Test article-related microscopic findings occurred in adrenal gland (cortical atrophy- with  
1031 correlating decreases in adrenal weights in females), liver (increased severity of  
1032 centrilobular hypertrophy; hepatocyte vacuolation; hepatocyte vacuolation; and  
1033 inflammation/necrosis), lymphoid tissues (thymus, spleen, mandibular lymph node,  
1034 mesenteric lymph node, and gut-associated lymphoid tissue [GALT]) skin, and pancreatic  
1035 islets (minimal to mild hypertrophy). Observed changes in these tissues are considered  
1036 pharmacologically-mediated and not adverse.

1037 An increased incidence of decreased anagen hair follicles occurred in mice at  
1038 45 mg/kg/day. Decreased anagen hair follicles was documented for individual animals  
1039 when there were no anagen hair follicles in the section of skin. Incidence in controls and  
1040 mice at 5 and 15 mg/kg/day were similar. A severity score was not given to the decrease  
1041 as this may have been somewhat dependent on size of skin sample. This change is not  
1042 considered adverse.

1043 There was full reversibility of lymphoid changes in thymus, spleen, mesenteric lymph  
1044 node, mandibular lymph node, and GALT. There were no meaningful differences  
1045 between treated and controls at the end of the recovery tissues for these lymphoid tissues.  
1046 There was recovery of adrenal gland findings in females and partial recovery of adrenal  
1047 gland findings in males. In addition, there was partial reversibility of liver findings for  
1048 males and females. Minor changes persisted in the pancreas and skin.

1049

1050

Systemic exposure to vamorolone appeared to be sex-dependent on Day 1

1051

(males > females) and appeared to be independent of sex on Day 179. Following daily

1052

administration of vamorolone in females and males, systemic exposure ( $AUC_{0-24hr}$ ) and

1053

$C_{max}$  values of vamorolone increased with increasing dose in a greater than dose

1054

proportional manner on Day 1 and in an approximately dose proportional manner on

1055

Day 179. Systemic exposure to vamorolone in females appeared to increase following

1056

repeated administration of vamorolone at 5 mg/kg, did not appear to change following

1057

repeated administration of vamorolone at 15 mg/kg, and appeared to decrease following

1058

repeated administration of vamorolone at 45 mg/kg. Systemic exposure to vamorolone in

1059

males appeared to decrease following repeated administration of vamorolone (**Table 1**).

1060

**Table 1.  $AUC_{0-24hr}$  in Mice after 179 Days Treatment with 3 Dose Levels (5, 15 and 45 mg/kg/day)**

1061

| Average $AUC_{0-24hr}$ (hr*ng/mL) |       |         |        |         |
|-----------------------------------|-------|---------|--------|---------|
| Dose<br>(mg/kg/day)               | Male  |         | Female |         |
|                                   | Day 1 | Day 179 | Day 1  | Day 179 |
| 5                                 | 5700  | 1150    | 159    | 991     |
| 15                                | 11600 | 3710    | 3450   | 4240    |
| 45                                | 50700 | 10200   | 27000  | 12700   |

1063

1064

1065

The once daily administration of vamorolone via oral gavage to mice for 26 weeks at 5,

1066

15, and 45 mg/kg/day did not produce any adverse effects. Therefore, the No-

1067

Observable-Adverse-Effect Level (NOAEL) is considered to be 45 mg/kg/day under the

1068

conditions of this study.

1069

As liver is considered a primary target organ, the liver enzymes (aspartate

1070

aminotransferase [AST], alanine aminotransferase [ALT]) of mice in this study were

1071

studied at study termination (**Figure 1**).

1072

1073

1074

1075

**Figure 1 Liver Function Enzymes in GLP Chronic Toxicology Study in Mice  
(26 weeks)**

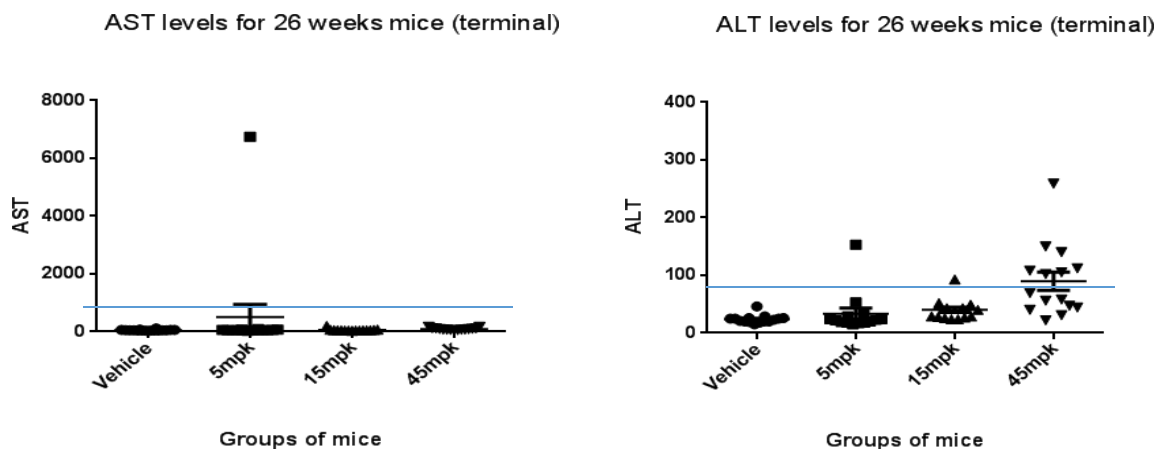

1076

1077

1078

1079

1080

1081

There were no differences between male and female mice regarding liver function enzymes. There were no drug-related elevations of AST at any dose. The highest dose tested (45 mg/kg/day) showed mild elevations of ALT with about half of values above the upper limit of normal range. The mild elevations of ALT were reversible, returning to within normal range after cessation of drug.

1082

1083

1084

1085

The Study Director concluded that the once daily administration of vamorolone via oral gavage to mice for 26 weeks at 5, 15, and 45 mg/kg/day did not produce any adverse effects. Therefore, the No-Observable-Adverse-Effect Level (NOAEL) is considered to be 45 mg/kg/day under the conditions of this study.

1086

1087

39-week chronic toxicity study in beagle dogs

1088

1089

1090

1091

1092

1093

1094

Vamorolone or vehicle was administered to beagle dogs once daily for 39 weeks at doses of 2, 10 and 50 mg/kg/day. Six dogs of each sex received each dose or placebo, and two of the six dogs of each sex at each dose or placebo were followed for an additional 4 weeks to evaluate reversibility, progression, or delayed appearance of any observed changes. One male dog that received 50 mg/kg/day was euthanized in extremis on Day 273 due to paraphimosis (an extended penis). All other animals survived to their scheduled termination.

1095

1096

Detailed clinical observations considered test article-related at 50 mg/kg/day, and reversible, included decreased activity (considered adverse), struggling during dosing, feces soft, limb function impaired, interdigital cysts, and unkempt appearance (considered adverse). Test article-related, dose-dependent increases in body weight gains correlating with increases in food consumption were observed relative to controls in males at all dose levels and in females at 10 and 50 mg/kg/day. Test article-related, reversible increases in average mean food consumption were observed relative to controls over the course of the 39-week dose phase in both sexes at 10 and 50 mg/kg/day.

1104

No test article-related ophthalmological effects were noted. No test-article-related changes were noted in respiratory rates or rectal temperatures. There may have been a mild dose-related reversible increase in the heart rate at the terminal post-dose interval that was significantly different from vehicle in both sexes following the 50 mg/kg/day dose. Semen analysis/evaluation for test article effects could not be conducted as there were not enough viable samples collected.

1110

Test article-related effects on clinical pathology endpoints with microscopic correlates included the following:

1112

- A hepatocellular and hepatobiliary effect in males at 10 mg/kg/day and both sexes at 50 mg/kg/day, which included increased alkaline phosphatase, gamma glutamyltransferase, alanine aminotransferase, and aspartate aminotransferase activity. These changes correlated with microscopic changes in the liver, bile duct, and gall bladder. This spectrum of changes was considered adverse in both sexes at 50 mg/kg/day.

1118

- There was also evidence of an inflammatory response in both sexes at 50 mg/kg/day, which included increased total leukocyte, neutrophil, and monocyte counts, and increased fibrinogen and/or globulin concentrations. The inflammatory response was likely secondary to inflammation in the liver associated with hepatocellular necrosis. Platelet counts were also increased in both sexes at 50 mg/kg/day and may have been secondary to the inflammatory response.

1124

1125

1126 Following a 4-week recovery period, all noted clinical pathological changes resolved,  
1127 with the exceptions of increased alanine aminotransferase activity in both sexes at  
1128 50 mg/kg/day, and increased globulin in males at 50 mg/kg/day.

1129

1130 Reversible, test article-related macroscopic findings included mildly to moderately  
1131 enlarged livers in males and females at 50 mg/kg/day, which correlated microscopically  
1132 with panlobular hepatocellular hypertrophy and/or hepatocellular vacuolation;  
1133 hemorrhage in the gall bladder of one 50 mg/kg/day female, that was associated with  
1134 moderate acute inflammation and mild vascular necrosis, and considered to be adverse;  
1135 red focus/foci within the pylorus of the stomach of one 50 mg/kg/day female and one  
1136 male at 10 mg/kg/day, which correlated microscopically with mild acute inflammation in  
1137 the female.

1138 Test article-related organ weight changes at the terminal necropsy included decreases in  
1139 adrenal gland weights in both sexes at  $\geq 2$  mg/kg/day (microscopic correlate of bilateral  
1140 cortical atrophy); increases in liver weights in both sexes at  $\geq 10$  mg/kg/day (microscopic  
1141 correlates of panlobular hepatocellular hypertrophy and/or hepatocellular vacuolation);  
1142 increases in kidney weights in females at  $\geq 10$  mg/kg/day and males at 50 mg/kg/day  
1143 (microscopic correlate of bilateral tubular vacuolation); decreases in prostate gland  
1144 weights in males at 50 mg/kg/day (microscopic correlate of decreased secretory product).

1145 These organ weight changes were all reversible, except for the decreases in the prostate  
1146 gland. Microscopic evaluation revealed the following test article-related changes:  
1147 adrenal glands (atrophy of the zona fasciculata and zona reticularis and  
1148 hypertrophy/hyperplasia of the zona glomerulosa in both sexes at  $\geq 10$  mg/kg/day and  
1149 atrophy was considered adverse); esophagus and pylorus of the stomach  
1150 (erosion/ulceration in a few animals of both sexes at 50 mg/kg/day); gallbladder  
1151 (hypertrophy/hyperplasia of the mucosal epithelium in both sexes at  $\geq 10$  mg/kg/day and  
1152 cytoplasmic vacuolation of the mucosal epithelium in males at  $\geq 10$  mg/kg/day and  
1153 females at  $\geq 2$  mg/kg/day); liver (hepatocellular vacuolation in males at  $\geq 10$  mg/kg/day  
1154 and females at  $\geq 2$  mg/kg/day, panlobular hypertrophy in males at 50 mg/kg/day and  
1155 females at  $\geq 10$  mg/kg/day, and inflammation/necrosis in both sexes at 50 mg/kg/day and  
1156 considered adverse, bile duct hyperplasia in both sexes at 50 mg/kg/day, bile duct

1157

1158 hypertrophy in males at 50 mg/kg/day and females at  $\geq 10$  mg/kg/day, and cytoplasmic  
1159 vacuolation of the bile duct epithelium in both sexes at  $\geq 10$  mg/kg/day); kidneys  
1160 (bilateral tubular vacuolation in males at 50 mg/kg/day and females at  $\geq 10$  mg/kg/day  
1161 and an increased incidence of bilateral basophilic tubules in males and females at  
1162 50 mg/kg/day); lymphoid depletion in both sexes at 50 mg/kg/day in mandibular and  
1163 mesenteric lymph nodes, thymus and spleen (with extramedullary hematopoiesis in  
1164 50 mg/kg/day females); bone marrow in the sternum (increased adipocytes in males at  
1165  $\geq 2$  mg/kg/day and females at 50 mg/kg/day); testes (spermatocyte/spermatid  
1166 degeneration in males at 50 mg/kg/day); epididymides (oligospermia/germ cell debris in  
1167 males at 50 mg/kg/day); ovaries (absent corpora lutea in females at  $\geq 2$  mg/kg/day and  
1168 considered adverse); the mammary gland and other tissues in the female reproductive  
1169 tract (uterus, cervix, and vagina) of these animals were consistent with animals that have  
1170 not ovulated; vacuolation in the epithelium of the mammary gland duct in females at  
1171 50 mg/kg/day; parotid salivary gland (cytoplasmic alteration in both sexes at  
1172  $\geq 10$  mg/kg/day); biceps femoris (atrophy of the skeletal muscle in both sexes at  
1173 50 mg/kg/day); skin (atrophy and alopecia/hypotrichosis in males at 50 mg/kg/day and  
1174 females at  $\geq 10$  mg/kg/day); prostate gland (decreased secretory product in males at  
1175 50 mg/kg/day); thyroid glands (bilateral increased colloid in males at  $\geq 10$  mg/kg/day).

1176

1177 Many of the findings were considered by the Study Director to be consistent with the  
1178 pharmacology of the test article including cortical atrophy of the adrenal glands (affecting  
1179 the zona fasciculata and reticularis), generalized lymphoid depletion in lymphoid tissues  
1180 (thymus, spleen, and lymph nodes), increased adipocytes in the bone marrow, atrophy of  
1181 the skeletal muscle, alopecia/hypotrichosis and atrophy of the skin (thinning of the  
1182 dermal collagen and atrophy of hair follicles and adnexa), an absence of corpora lutea in  
1183 the ovary (likely indicative of delayed puberty), decreased secretory product in the  
1184 prostate gland, and multiple changes in the liver. The liver had panlobular hypertrophy  
1185 and vacuolation of hepatocytes consistent with glycogen accumulation. Due to the  
1186 magnitude of hypertrophy and vacuolation, there were (likely secondary) foci of  
1187 hepatocellular necrosis and inflammation.

1188

1189 Test article-related microscopic findings at the recovery necropsy were present in the  
1190 adrenal glands, liver, gallbladder, kidneys, stomach (pylorus), female reproductive tract  
1191 (ovaries), male reproductive tract (testes, epididymides, prostate gland), mesenteric  
1192 lymph node, skeletal muscle (biceps femoris), and parotid salivary gland.

1193 The No Observed Adverse Effect Level was 2 mg/kg/day for males; a No Observed  
1194 Adverse Effect Level was not observed for females (ReveraGen Report No. 1998-014).

1195 7-day study in cynomolgus monkeys  
1196

1197 Non-naive cynomolgus monkeys were administered vamorolone or vehicle QD for  
1198 7 consecutive days at doses of 100, 300, and 600 mg/kg. All animals survived until the  
1199 end of the study period. There were effects on clinical observations, food consumption,  
1200 and urinalysis attributable to vamorolone that are described below.

1201 There was a dose proportional decrease in body weight gain observed in males and  
1202 females at each dose (up to 11% and 9% respectively) related to vamorolone. A  
1203 cessation of the body weight loss in treatment was observed during the recovery phase  
1204 but no recovery of body weight lost during the 7 days of dosing was observed.

1205 At termination there were nonsignificant increases in red cell mass and decreases in  
1206 lymphocytes (up to 56%) in the 600 mg/kg/day dose group. However, most individual  
1207 animals, including controls, had decreases in lymphocytes (up to 81%) at termination  
1208 relative to their respective pretest. These decreases had resolved by the recovery interval  
1209 in both sexes.

1210 In both sexes receiving  $\geq 300$  mg/kg/day, there was increased urea nitrogen (up to 141%),  
1211 creatinine (up to 58%), total protein (up to 15%), albumin (up to 11%), globulin (up to  
1212 25%), and/or potassium (up to 39%) with concurrent decreases in sodium (up to 10%)  
1213 and chloride (up to 10%) relative to controls. At the recovery interval, the majority of  
1214 these effects had resolved (ReveraGen Report No. 1998-001).

1215 ***Genotoxicity***  
1216

1217 The mutagenic and genotoxic potential of vamorolone was assessed in several assays. A  
1218 non-GLP Ames screen was negative for bacterial mutations (ReveraGen Report No.

1219  
1220 BIO-VBP-001-AMES). In a GLP Ames test, no background lawn toxicity was observed;  
1221 however, a reduction in revertant counts was observed (ReveraGen Report No.  
1222 AD79DT.502ICH.BTL). Vamorolone was negative for inducing chromosomal  
1223 aberrations in cultured mouse lymphocytes without and with metabolic activation  
1224 (ReveraGen Report No. AD79DT.704.BTL).

1225 Femoral bone marrow was microscopically evaluated for the presence of polychromatic  
1226 erythrocytes (PCEs) containing micronuclei. No significant reductions in the PCEs/EC  
1227 (total erythrocytes) ratio were observed in the vamorolone groups compared to the  
1228 vehicle control group. Although statistically significant increases in the incidence of  
1229 micronucleated PCEs in the vamorolone treated groups were observed, no dose response  
1230 was observed with respect to other groups and the values of micronuclei for the  
1231 individual animals were within the historical range. Therefore, the statistically  
1232 significant increase was considered as biologically insignificant (ReveraGen Report No.  
1233 AD76BK.123012ICH.BTL).

1234 A study was performed to evaluate the potential mutagenicity of two theoretical epoxide  
1235 impurities related to the drug substance vamorolone (formerly VBP15), which is a  
1236 steroid-like structure containing a delta 9,11 double bond. The delta 9,11 epoxide  
1237 structures evaluated were VBP15-B-3, which is structurally similar to vamorolone except  
1238 for the epoxide moiety, and VBP15-B-2, which has a 21-acetate substitution (vamorolone  
1239 and VBP15-B-3 contain a 21-hydroxy moiety). Two validated and complementary  
1240 *in silico* prediction methodologies were used for assessing mutagenic potential. The  
1241 statistics-based quantitative structure-activity relationship (QSAR) program MultiCASE  
1242 CASE Ultra was used, employing four different modules (GT1\_A7B, GT1\_AT\_ECOLI,  
1243 PHARM\_ECOLI, and PHARM\_SAL) designed to cover a wide range of molecular  
1244 substructures collected from both proprietary and public compounds. In addition, the  
1245 expert rule-based SAR program Derek Nexus was used to determine if the theoretical  
1246 impurities contained structural alerts associated with known genotoxicants. CASE Ultra  
1247 predicted both VBP15-B-2 and VBP15-B-3 as negative for mutagenicity (ReveraGen  
1248 Report “In Silico Mutagenicity Evaluation of Delta 9,11 Epoxide Structures of VBP15:  
1249 VBP15-B-2 [21-Acetate] and VBP15-B-3 [21-Hydroxy]”).



1250

Taken together, these data indicate vamorolone is negative for any mutagenic signal.

1251

1252

1253

### **1.3 Clinical Experience**

1254

1255

Clinical experience with vamorolone is comprised of a completed Phase I clinical trial of vamorolone in healthy adult volunteers (VBP15-001), completed Phase IIa (VBP15-002) and Phase II extension (VBP15-003) trials in DMD boys, and an ongoing long-term extension (VBP15-LTE) trial in DMD boys.

1256

1257

1258

1259

#### ***1.3.1 Phase I Study in Healthy Adult Male Volunteers (VBP15-001)***

1259

1260

##### ***Study Design and Objectives***

1260

1261

The safety, tolerability, and PK of vamorolone were initially evaluated in a Phase I randomized, placebo-controlled, double-blind, single ascending dose (SAD) and multiple ascending dose (MAD) study. In the SAD portion of the study, Cohorts 1 through 5 and Cohort 7 were comprised of eight subjects each; six subjects in each cohort received a single oral dose of vamorolone (0.1 mg/kg, 0.3 mg/kg, 1.0 mg/kg, 3.0 mg/kg, 8.0 mg/kg, and 20 mg/kg, respectively) and two subjects in each cohort received placebo under fasted conditions. In Cohort 6, six subjects received a single oral dose of 8.0 mg/kg vamorolone within 30 minutes of beginning a high fat/high calorie meal. The MAD portion of the study had four cohorts of 8 subjects each; six subjects in each cohort received 14 daily doses of vamorolone (1.0, 3.0, 9.0 and 20.0 mg/kg/day) and two subjects in each cohort received placebo.

1262

1263

1264

1265

1266

1267

1268

1269

1270

1271

1272

1273

1274

1275

1276

1277

1278

The primary objectives of the Phase I study were to evaluate the safety and tolerability of single and multiple oral doses of vamorolone, and to evaluate the PK of single doses and multiple doses of vamorolone. A secondary objective was to evaluate the effect of food on the absorption and PK of vamorolone. Other objectives were to obtain samples from subjects on Day 1 (pre-dose) and Day 14 of the MAD cohorts for use in Metabolites in Safety Testing (MIST) assessments, and to test back-up PK samples from a subset of MAD subjects for pharmacodynamic (PD) biomarkers.

1272

1273

1274

1275

1276

1277

1278

1279

##### ***Pharmacokinetics***

1279

1280

1281

##### **SAD Cohorts – Pharmacokinetics (Fasted)**

1282  
 1283  
 1284  
 1285  
 1286  
 1287  
 1288  
 1289  
 1290  
 1291  
 1292

Vamorolone PK data shows strong adherence to dose linearity and dose proportionality, with relatively little subject-subject variation (**Figure 2, Table 2, Figure 3**). The half-life was about 2 hours for doses 0.1-1.0 mg/kg. Doses at 3.0, 8.0 and 20.0 mg/kg showed an extended tail, increasing half-life to 2.5, 3.3 and 4.3 hours, respectively (**Figure 2, Table 2**).

**Figure 2. Plasma Concentrations of Vamorolone (VBP15) after Oral Administration of Single Doses of 0.1, 0.3, 1, 3, 8, and 20 mg/kg to Healthy Subjects Under Fasted Conditions**

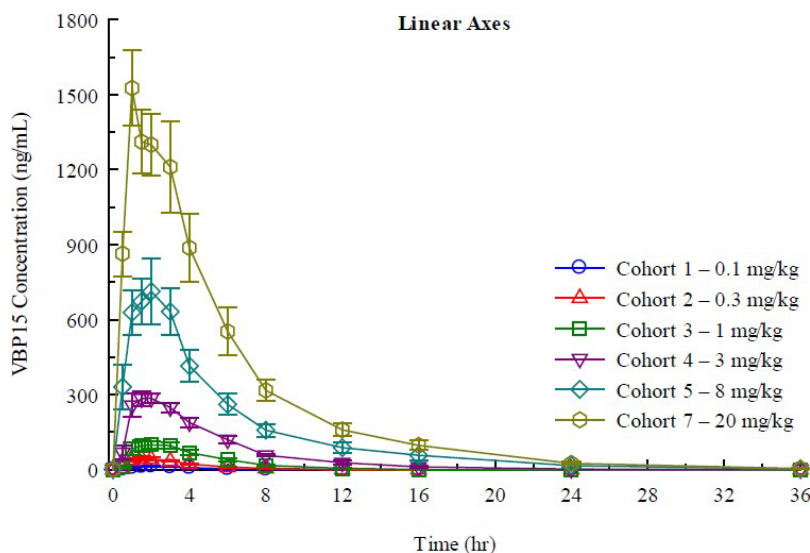

1293  
 1294  
 1295  
 1296  
 1297  
 1298

Data presented as arithmetic mean ± standard error

**Table 2. Summary of Pharmacokinetic Parameters for Vamorolone after Oral Administration of Single Doses of 0.1, 0.3, 1.0, 3.0, 8.0, and 20.0 mg/kg to Healthy Subjects Under Fasted Conditions**

| Parameter*                      | Dose              |                   |                   |                   |                   |                   |
|---------------------------------|-------------------|-------------------|-------------------|-------------------|-------------------|-------------------|
|                                 | 0.1 mg/kg         | 0.3 mg/kg         | 1 mg/kg           | 3 mg/kg           | 8 mg/kg           | 20 mg/kg          |
| C <sub>max</sub> (ng/mL)        | 13.1 (12.8) (6)   | 50.8 (16.5) (6)   | 122 (32.8) (6)    | 305 (24.4) (6)    | 718 (42.5) (6)    | 1,648 (16.7) (6)  |
| T <sub>max</sub> (hr)           | 1.50 (6)          | 1.50 (6)          | 1.75 (6)          | 1.75 (6)          | 1.78 (6)          | 1.50 (6)          |
| AUC <sub>(0-t)</sub> (hr×ng/mL) | [1.50 – 2.03]     | [1.00 – 3.00]     | [1.00 – 3.00]     | [1.00 – 2.00]     | [1.00 – 2.00]     | [1.00 – 3.03]     |
| AUC <sub>(inf)</sub> (hr×ng/mL) | 41.9 (16.8) (6)   | 161 (15.9) (6)    | 486 (19.7) (6)    | 1,577 (20.7) (6)  | 3,997 (55.0) (6)  | 8,545 (29.5) (6)  |
| λ <sub>z</sub> (1/hr)           | 49.5 (12.5) (6)   | 170 (16.5) (6)    | 500 (19.2) (6)    | 1,600 (20.3) (6)  | 3,602 (60.2) (4)  | 8,653 (37.0) (4)  |
| t <sub>1/2</sub> (hr)           | 0.4060 (12.5) (6) | 0.4325 (17.8) (6) | 0.3828 (17.9) (6) | 0.2773 (16.3) (6) | 0.2136 (40.9) (4) | 0.1629 (25.2) (4) |
| CL/F                            | 1.71 (12.5) (6)   | 1.60 (17.8) (6)   | 1.81 (17.9) (6)   | 2.50 (16.3) (6)   | 3.25 (40.9) (4)   | 4.26 (25.2) (4)   |
| (L/hr/kg)                       | 2.02 (12.5) (6)   | 1.76 (16.5) (6)   | 2.00 (19.2) (6)   | 1.88 (20.3) (6)   | 2.22 (60.2) (4)   | 2.31 (37.0) (4)   |
| (L/hr)                          | 168 (20.8) (6)    | 142 (14.4) (6)    | 165 (12.0) (6)    | 152 (18.5) (6)    | 196 (57.6) (4)    | 180 (29.8) (4)    |
| V <sub>z</sub> /F               | 4.98 (6.14) (6)   | 4.07 (20.5) (6)   | 5.22 (18.5) (6)   | 6.76 (28.7) (6)   | 10.4 (61.8) (4)   | 14.2 (37.2) (4)   |
| (L)                             | 415 (17.4) (6)    | 329 (19.6) (6)    | 432 (22.8) (6)    | 550 (28.7) (6)    | 919 (63.1) (4)    | 1,107 (34.6) (4)  |

1299  
 1300  
 1301

\*Geometric mean (%CV) (N) except T<sub>max</sub> for which the median (N) [Range] is reported.  
 C<sub>max</sub> = maximum observed plasma concentration; T<sub>max</sub> = time to maximum observed plasma concentration; AUC<sub>(0-t)</sub> = area under concentration-time curve from time 0 to time t; AUC<sub>(inf)</sub> = area under concentration-time curve from time 0

1302  
1303  
1304  
1305  
1306  
1307  
1308  
1309  
1310

to infinity;  $\lambda_z$  = elimination rate constant;  $t_{1/2}$  = terminal half-life;  $CL/F$  = apparent total clearance from plasma;  $V_z/F$  = apparent volume of distribution during terminal phase.

**Figure 3. Relationship Between Individual Subject Vamorolone AUC<sub>(inf)</sub> and Dose After Oral Administration of Single Doses of 0.1, 0.3, 1, 3, 8, and 20 mg/kg to Healthy Subjects Under Fasted Conditions**

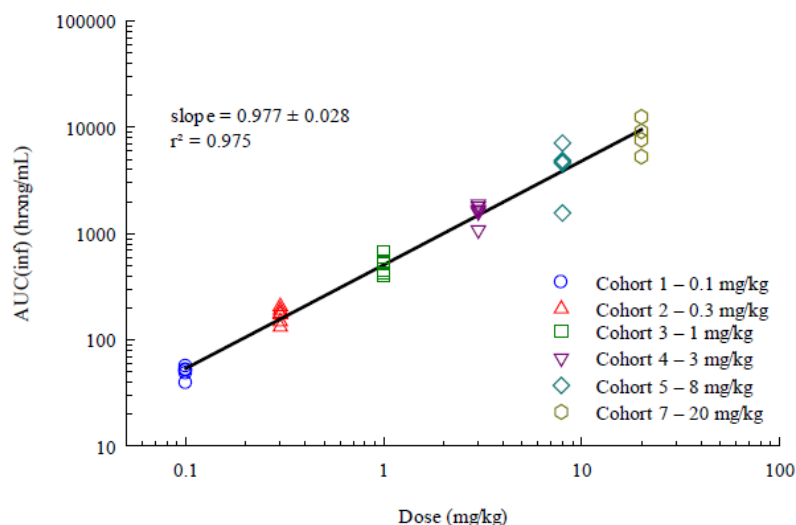

1311  
1312  
1313  
1314  
1315  
1316  
1317

SAD Cohorts – Pharmacokinetics (Fed)

For the food effect group, a high fat meal (45 grams fat) was given to a cohort of Phase I SAD volunteers with the 8.0 mg/kg dose of vamorolone. These data were then compared to the fasted 8.0 mg/kg cohort data. This showed that absorption was increased by 2.5-fold by the high fat meal, consistent with the lipophilic character of vamorolone (steroidal compound) (Figure 4, Table 3).

1318

1319

1320

1321

1322

**Figure 4. Plasma Concentrations of Vamorolone (VBP15) After Single Dose Oral Administration of 8 mg/kg to Healthy Subjects Under Fed and Fasted Conditions**

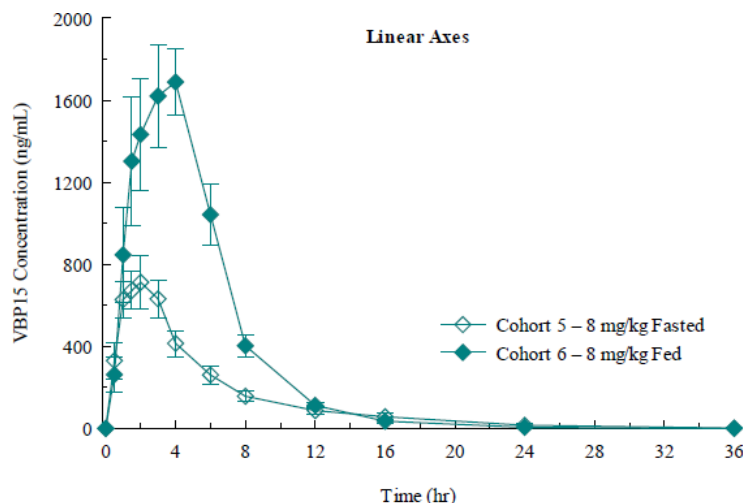

1323

Data presented as arithmetic mean ± standard error

1324

1325

1326

1327

**Table 3. Summary of Pharmacokinetic Parameters for Vamorolone After Single Dose Oral Administration of 8 mg/kg to Healthy Subjects Under Fed and Fasted Conditions**

| Parameter*                      | 8 mg/kg                   |                           | Ratio† |
|---------------------------------|---------------------------|---------------------------|--------|
|                                 | Fasted                    | Fed                       |        |
| C <sub>max</sub> (ng/mL)        | 718 (42.5) (6)            | 1,817 (31.4) (6)          | 2.53   |
| T <sub>max</sub> (hr)           | 1.78 (6)<br>[1.00 – 2.00] | 4.00 (6)<br>[2.00 – 6.00] |        |
| AUC <sub>(0-t)</sub> (hr×ng/mL) | 3,997 (55.0) (6)          | 10,139 (25.1) (6)         | 2.54   |
| AUC <sub>(inf)</sub> (hr×ng/mL) | 3,602 (60.2) (4)          | 10,170 (24.9) (6)         | 2.82   |
| λ <sub>z</sub> (1/hr)           | 0.2136 (40.9) (4)         | 0.2950 (18.9) (6)         |        |
| t <sub>1/2</sub> (hr)           | 3.25 (40.9) (4)           | 2.35 (18.9) (6)           |        |
| CL/F                            |                           |                           |        |
| (L/hr/kg)                       | 2.22 (60.2) (4)           | 0.79 (24.9) (6)           |        |
| (L/hr)                          | 196 (57.6) (4)            | 66.7 (28.4) (6)           |        |
| V <sub>z</sub> /F               |                           |                           |        |
| (L/kg)                          | 10.4 (61.8) (4)           | 2.67 (23.4) (6)           |        |
| (L)                             | 919 (63.1) (4)            | 226 (29.2) (6)            |        |

1328

\*Geometric mean (%CV) (N) except T<sub>max</sub> for which the median (N) is reported.

1329

†Ratio of the geometric means.

1330

1331

1332

1333

C<sub>max</sub> = maximum observed plasma concentration; T<sub>max</sub> = time to maximum observed plasma concentration; AUC<sub>(0-t)</sub> = area under concentration-time curve from time 0 to time t; AUC<sub>(inf)</sub> = area under concentration-time curve from time 0 to infinity; λ<sub>z</sub> = elimination rate constant; t<sub>1/2</sub> = terminal half-life; CL/F = apparent total clearance from plasma; V<sub>z</sub>/F = apparent volume of distribution during terminal phase: .

1334

1335

MAD Cohorts

1336

The Phase I MAD treatment plan was discussed in light of the initial PK data. The relatively short half-life of vamorolone (2-4 hours), coupled with the planned daily dose schedule, would be expected to give PK data on each single dose, not cumulative dose, as the dosing interval was  $> 5 \times t_{1/2}$ . Thus, the MAD component would be a study of individual daily doses, rather than dose-related accumulation and pharmacodistribution related to cumulative drug exposure. In other words, a typical goal of a MAD study is to determine steady state drug levels after multiple doses; yet with the short half-life of vamorolone, useful information would not be expected to be gained with the current daily dosing schedule. Safety and tolerability are additional goals of the MAD study, and these remain important endpoints independent of the PK studies.

1337

1338

1339

1340

1341

1342

1343

1344

1345

1346

MAD Cohorts – Pharmacokinetics Fasted

1347

The original design for the Phase I MAD was modified to remove the two lowest doses (0.1, 0.3 mg/kg/day), and to begin dosing at 1.0 mg/kg/day. The clinical conduct of all four cohorts has been completed (1.0 mg/kg/day, 3.0 mg/kg/day, 9.0 mg/kg/day, 20.0 mg/kg/day) for the MAD study (**Table 4**).

1348

1349

1350

1351  
 1352  
 1353  
 1354

**Table 4. Summary of Pharmacokinetic Parameters for Vamorolone During Oral Administration of 1, 3, 9, and 20 mg/kg Doses Once Daily for 14 Days to Healthy Subjects Under Fasted Conditions**

|                                    | Vamorolone Dose       |                       |                       |                       |
|------------------------------------|-----------------------|-----------------------|-----------------------|-----------------------|
|                                    | 1 mg/kg               | 3 mg/kg               | 9 mg/kg               | 20 mg/kg              |
| Day 1<br>C <sub>max</sub> (ng/mL)  | 153 (15.9)            | 281 (36.9)            | 1,082 (23.3)          | 2,416 (51.1)          |
| T <sub>max</sub> (hr)              | 3.04<br>[1.50 – 4.00] | 2.01<br>[1.00 – 3.00] | 1.75<br>[1.00 – 6.00] | 1.00<br>[0.50 – 3.00] |
| AUC <sub>(0-t)</sub> (hr×ng/mL)    | 686 (22.4)            | 1,471 (23.6)          | 5,709 (29.9)          | 10,182 (28.1)         |
| AUC <sub>(0-24)</sub> (hr×ng/mL)   | 686 (22.4)            | 1,471 (23.6)          | 5,709 (29.9)          | 10,182 (28.1)         |
| AUC <sub>(inf)</sub> (hr×ng/mL)    | 695 (22.1)            | 1,487 (23.7)          | 5,745 (29.5)          | 10,190 (27.0)         |
| λ <sub>z</sub> (1/hr)              | 0.3848 (10.9)         | 0.2918 (18.1)         | 0.2317 (22.6)         | 0.1747 (44.3)         |
| t <sub>1/2</sub> (hr)              | 1.80 (10.9)           | 2.38 (18.1)           | 2.99 (22.6)           | 3.97 (44.3)           |
| CL/F (L/hr/kg)                     | 1.44 (22.1)           | 2.02 (23.7)           | 1.57 (29.5)           | 1.96 (27.0)           |
| V <sub>z</sub> /F (L/kg)           | 3.74 (16.9)           | 6.91 (34.8)           | 6.76 (46.9)           | 11.2 (77.6)           |
| Day 14<br>C <sub>max</sub> (ng/mL) | 203 (30.1)            | 276 (35.6)            | 935 (48.3)            | 2,491 (27.9)          |
| T <sub>max</sub> (hr)              | 2.96<br>[1.50 – 3.00] | 2.50<br>[1.00 – 4.00] | 1.25<br>[0.55 – 3.00] | 2.00<br>[1.00 – 2.00] |
| AUC <sub>(0-24)</sub> (hr×ng/mL)   | 794 (22.3)            | 1,494 (18.6)          | 4,366 (20.2)          | 9,309 (38.8)          |
| λ <sub>z</sub> (1/hr)              | 0.3993 (20.4)         | 0.3273 (25.2)         | 0.1629 (63.5)         | 0.1879 (31.6)         |
| t <sub>1/2</sub> (hr)              | 1.74 (20.4)           | 2.12 (25.2)           | 4.25 (63.5)           | 3.69 (31.6)           |
| CL/F (L/hr/kg)                     | 1.26 (22.3)           | 2.01 (18.6)           | 2.06 (20.2)           | 2.15 (38.8)           |
| V <sub>z</sub> /F (L/kg)           | 3.15 (20.6)           | 6.14 (39.7)           | 12.7 (79.9)           | 11.4 (49.1)           |

1356  
 1357  
 1358  
 1359  
 1360  
 1361

C<sub>max</sub> = maximum observed plasma concentration; T<sub>max</sub> = time to maximum observed plasma concentration; AUC<sub>(0-t)</sub> = area under concentration-time curve from time 0 to time t; AUC<sub>(0-24)</sub> = area under concentration-time curve from time 0 to 24 hours; AUC<sub>(inf)</sub> = area under concentration-time curve from time 0 to infinity; λ<sub>z</sub> = elimination rate constant; t<sub>1/2</sub> = terminal half-life; CL/F = apparent total clearance from plasma; V<sub>z</sub>/F = apparent volume of distribution during terminal phase.

1362  
 1363  
 1364  
 1365  
 1366  
 1367

Taking into account the small numbers and different subjects, the geometric mean values for C<sub>max</sub>, AUC<sub>(0-t)</sub>, and AUC<sub>(inf)</sub> are not different for the SAD and MAD cohorts. Within the MAD, there is good agreement between Days 1 and 14 at all dose groups. There is no accumulation — the geometric mean C<sub>max</sub> and AUC<sub>(0-24)</sub> on Days 1 and 14 are not different, consistent with the t<sub>1/2</sub> (~2-4 hours) and dosing interval (24 hours) (**Figure 5; Table 4**).

1368

1369

1370

1371

1372

**Figure 5. Plasma Concentrations of Vamorolone (VBP15) on Days 1 and 14 During Oral Administration of 1, 3, 9, and 20 mg/kg Doses Once Daily for 14 Days to Healthy Subjects Under Fasted Conditions**

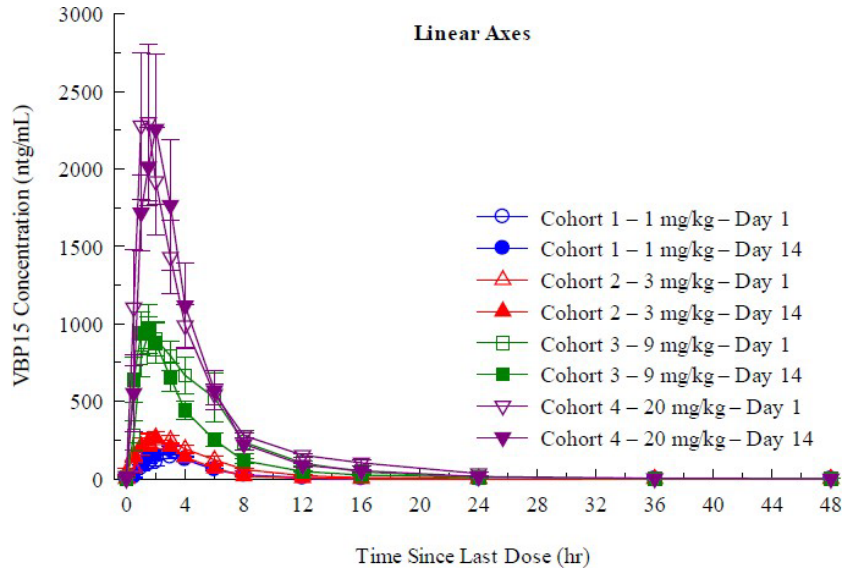

1373

Data presented as arithmetic mean  $\pm$  standard error

1374

1375

### **Safety**

1376

1377

#### **SAD Cohorts**

1378

In the SAD part, overall, 6 subjects (11%) administered vamorolone experienced a total

1379

of 10 treatment-emergent adverse events (TEAEs); no subject in the placebo group

1380

experienced any TEAEs. There was no dose-related trend in the incidence or severity of

1381

TEAEs; the dose group with the highest number of subjects reporting TEAEs was the

1382

0.1 mg/kg dose group (2 subjects, 33%), and the highest number of TEAEs (3 events)

1383

was reported by 1 subject in the 1.0 mg/kg vamorolone dose group. In the 0.3 and

1384

3.0 mg/kg vamorolone fasted and the 8.0 mg/kg fed dose groups, 1 subject per group

1385

(17%) experienced TEAEs, and no subjects in the 8.0 mg/kg and 20 mg/kg, fasted, dose

1386

groups experienced any TEAEs. The most common TEAEs were dizziness and

1387

headache, each reported by 2 subjects overall (4%); all other TEAEs were reported by

1388

only 1 subject (2%) and included ear pain, nausea, non-cardiac chest pain, and blood

1389

bilirubin increased. Three subjects (6%) had TEAEs that were considered possibly

1390

related to treatment. Possibly related TEAEs included nausea (1 subject, 2%), dizziness

1391

(2 subjects, 4%), and headache (2 subjects, 4%). One subject (2%) had a moderate

1392

1393 TEAE of blood bilirubin increased, which was considered unrelated to study drug. All  
1394 other TEAEs were mild in severity.

1395 MAD Cohorts

1396 In the MAD part, overall, a total of 6 subjects (19%) administered vamorolone or placebo  
1397 experienced a total of 10 TEAEs: 2 subjects each in the 1.0 mg/kg vamorolone, 20 mg/kg  
1398 vamorolone, and placebo groups, and none in the 3.0 mg/kg and 9.0 mg/kg dose groups.

1399 There was no dose-related trend in the incidence or severity of TEAEs. The most  
1400 common TEAE was headache (2 subjects, 6%); all other TEAEs occurred in only  
1401 1 subject (3%) per group, and included nausea, toothache, vomiting, ALT increased,  
1402 hepatic enzyme increased, arthralgia, dizziness, and syncope. TEAEs were considered  
1403 possibly related in 2 subjects (6%) and remotely related in 1 subject (3%). Possibly  
1404 related AEs were ALT increased and hepatic enzyme increased, occurring in 1 subject in  
1405 the 20 mg/kg vamorolone and placebo groups, respectively. The remotely related TEAEs  
1406 were dizziness and syncope, both occurring in the same subject (1.0 mg/kg vamorolone).  
1407 All TEAEs were mild in severity.

1408 With the exception of the AEs related to hepatic enzymes, there were no other  
1409 meaningful changes in clinical laboratory parameters. Of note, glucose levels remained  
1410 stable at all doses of vamorolone in both the SAD and MAD parts, suggesting that  
1411 vamorolone does not induce insulin resistance at the doses and dosing duration studied;  
1412 in addition, no changes in the white blood cell count differential were observed,  
1413 suggesting that vamorolone did not induce immunosuppressive effects in this study  
1414 population.

1415 ***Pharmacodynamic Safety Biomarkers***

1416  
1417 Vamorolone has shown improved safety profiles relative to prednisone in nonclinical  
1418 testing, both *in vitro* and *in vivo*.<sup>15,17</sup> Safety concerns with glucocorticoids include  
1419 suppression of the adrenal axis and insulin resistance. Pharmacodynamic biomarker  
1420 assays of suppression of the adrenal axis (serum cortisol) and insulin resistance (serum  
1421 glucose) were measured in the Phase I MAD studies of vamorolone.



1422  
1423  
1424  
1425  
1426  
1427  
1428  
1429  
  
1430  
1431  
1432  
1433  
1434  
1435  
1436  
1437  
1438  
1439  
1440

Suppression of the adrenal axis. Prednisone directly impinges on cortisol regulatory pathways (adrenal axis) both acutely and chronically. Acute suppression of adrenal function is seen within hours of doses of a single 0.1 mg/kg/day (approximate) dose of prednisone, as evidenced by reductions in adrenocorticotrophic hormone (ACTH) levels in normal volunteers.<sup>25</sup> More chronic suppression of the adrenal axis, characterized as severe, is typically diagnosed when morning cortisol is < 100 nmol/L (< 3.6 µg/dL) when drawn > 24 hrs after the last dose of pharmacological steroids.

Morning serum cortisol levels were measured in the vamorolone Phase I MAD cohorts, at baseline (prior to drug administration), 24 hours after the first dose (Day 1), and 24 hours after the 14-day dose (Day 15) (**Figure 6**). Active substance volunteers at four MAD dose levels are shown (1.0 mg/kg/day; 3.0 mg/kg/day; 9.0 mg/kg/day; 20.0 mg/kg/day); all subjects were treated for 14 days with daily dosing. The red hatched line on each graph shows a typical threshold for adrenal axis suppression (< 100 nmol/L, or < 3.6 µg/dL). P values shown are for paired T test, indicating significance of the consistency of longitudinal changes of subjects relative to their own individual baseline values. Acute adrenal axis suppression is measured at 24 hours (after first dose), whereas chronic adrenal axis suppression is measured after 14 days of daily dosing (24 hours after last dose).

1441  
1442  
1443  
1444

**Figure 6. Morning Cortisol Measurements in the Vamorolone Phase I Healthy Subjects**

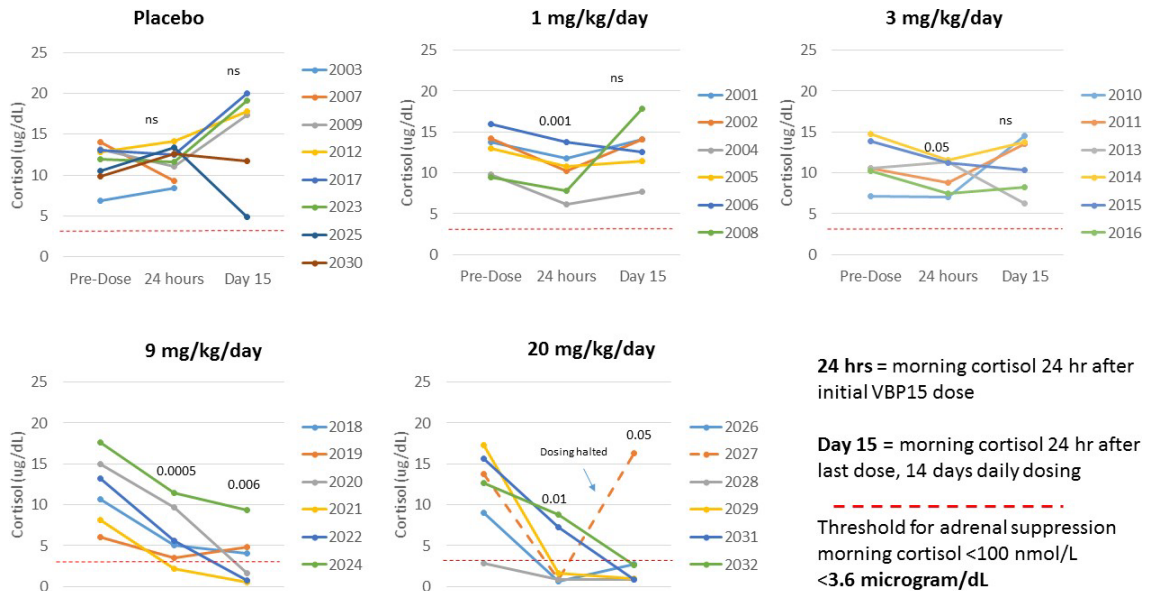

1445  
1446  
1447  
1448  
1449  
1450  
1451  
1452  
1453  
1454  
1455  
1456  
1457  
1458  
1459  
1460  
1461

Note: Placebo subjects from each of the four MAD cohorts are graphed together.

Vamorolone showed little evidence of either acute (24 hour data), or chronic (Day 15 data) suppression of the adrenal axis at doses of either 1.0 mg/kg/day or 3.0 mg/kg/day. The data suggest that vamorolone induces variable, mild, acute and chronic suppression of the adrenal axis at 9.0 mg/kg/day, and stronger evidence of both acute and chronic adrenal axis suppression at 20.0 mg/kg/day. Prednisone typically shows both acute and chronic adrenal axis suppression approximately at 0.1 mg/kg/day,<sup>25</sup> suggesting that vamorolone has an improved safety window regarding adrenal axis suppression.

Vamorolone thus shows approximately a 10-fold improvement in safety window compared to prednisone on a mg/kg comparative basis. These data are consistent with *in vitro* and *ex vivo* nonclinical mouse data comparing vamorolone to prednisone for adrenal suppression.<sup>15</sup>

Insulin resistance. Prednisone induces the safety signal of insulin resistance, where glucose is not efficiently taken up from the blood by target tissues, such as muscle and liver, leading to hyperglycemia.<sup>25</sup> Insulin resistance may be an important safety signal for dystrophic muscle, where the dysfunctional myofibers have been shown to have

1462

1463 inadequate energy stores,<sup>18,26</sup> and insulin resistance likely limits availability of glycogen  
1464 substrates for glycolysis. The hyperglycemia, in turn, leads to chronic increases in  
1465 insulin levels (hyperinsulinemia).

1466 Levels of fasting glucose and insulin are reasonably sensitive and reliable measures of  
1467 insulin resistance in non-diabetic individuals. Glucose is acutely (single dose) and  
1468 chronically (multiple doses) elevated after treatment with pharmacological  
1469 glucocorticoids. Glucose is elevated 24 hours after a single administration of  
1470 glucocorticoids (2.0 mg/kg).<sup>27,28</sup>

1471 In the Phase I MAD of vamorolone, fasting serum glucose was measured at 10 time  
1472 points during the 2-week study; each sample was taken 24 hours after the previous dose  
1473 of vamorolone (Figure 7).

1474 **Figure 7. Fasting Serum Glucose During the Phase I MAD Period (Two Weeks**  
1475 **Daily Treatment)**

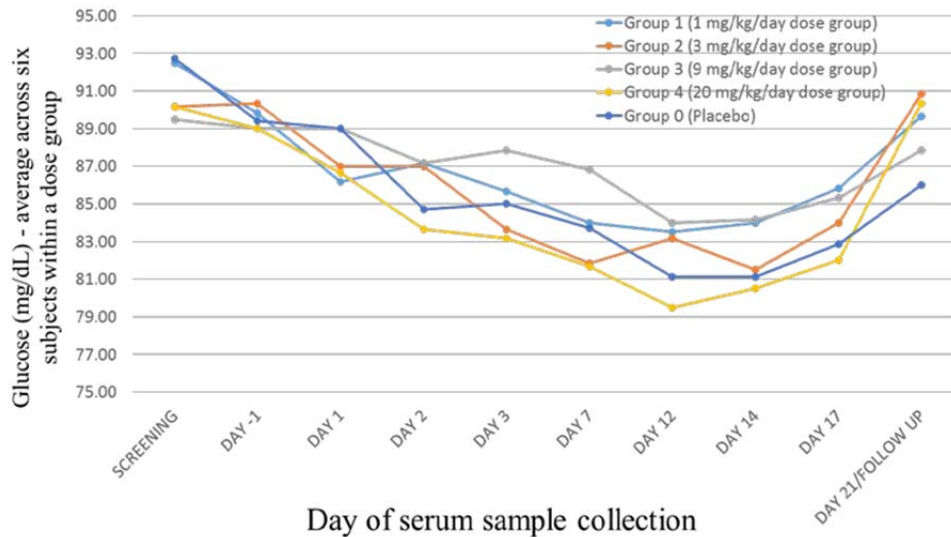

1476

1477 Glucose levels for all vamorolone dose groups were similar to those of the placebo group.  
1478 There was no evidence of elevations of glucose levels at any time point or any dose of  
1479 vamorolone, suggesting that the side effect of insulin resistance was not seen with  
1480 vamorolone. These data are consistent with a nonclinical study in a dystrophin-deficient  
1481 mouse model, where chronic treatment of prednisolone (5 mg/kg/day) versus vamorolone

1482

1483

(15 mg/kg/day; 30 mg/kg/day) showed development of insulin resistance with prednisolone, but not vamorolone.<sup>29</sup>

1484

1485

### ***Summary of Phase I Data***

1486

1487

#### Pharmacokinetics

1488

1489

- Vamorolone PK data show strong adherence to dose linearity and dose proportionality, with relatively little subject-subject variation (both SAD and MAD).

1490

1491

1492

- The half-life was about 2 hours for doses 0.1-1.0 mg/kg. Doses at 3.0, 8.0, and 20.0 mg/kg showed an extended tail, increasing half-life to 2.5, 3.8, and 3.8 hours, respectively. The PK for the MAD cohorts was very similar to the SAD cohorts, showing little if any drug accumulation, consistent with the short half-life and daily dosing schedule.

1493

1494

1495

1496

1497

- There were no apparent relationships between CL/F and body size, either in terms of body weight or BMI.

1498

1499

- For the food effect group, a high fat meal was given to a cohort of Phase I SAD volunteers with the 8.0 mg/kg dose of vamorolone. Comparison of the data from the high fat meal with the fasted 8.0 mg/kg cohort data showed that absorption was increased by 2.5-fold by the high fat meal, consistent with the lipophilic character of vamorolone (steroidal compound).

1500

1501

1502

1503

1504

#### Safety

1505

1506

- Single and multiple daily doses of vamorolone up to 20 mg/kg were well tolerated by healthy subjects, and a maximum tolerated dose (MTD) was not identified.

1507

1508

- Regarding the primary target organ, liver, one subject in the 20 mg/kg vamorolone MAD dose group who had an elevation of serum bilirubin at baseline (pre-dose) experienced an AE of ALT increased after 9 days of dosing; this AE was judged to be possibly related to vamorolone and drug dosing was halted. No other subjects in the vamorolone dose groups experienced AEs related to liver function.

1509

1510

1511

1512

1513

1514       • Results of post-dose morning cortisol levels suggest that vamorolone causes acute  
1515       adrenal suppression after single dosing and chronic adrenal suppression after  
1516       multiple dosing, but only at the higher ( $\geq 8.0$  mg/kg) single and multiple doses  
1517       studied.

1518       • Safety PD biomarker studies showed that vamorolone had an improved safety  
1519       window for adrenal axis suppression (100-fold increase in therapeutic window), no  
1520       evidence of insulin resistance, no changes in bone turnover markers (osteocalcin,  
1521       C-terminal peptide fragment of collagen 1[CTX1]), compared to prednisone studies  
1522       reported in the literature<sup>25,30</sup>

1523       • There were no clinically significant changes in vital signs, ECGs, or physical  
1524       examinations.

1525       ***1.3.2    Pharmacokinetics in Phase IIa Study in 4 to 7 years Duchenne Muscular***  
1526       ***Dystrophy Boys (VBP15-002)***

1527       Forty-eight boys with DMD received oral doses of vamorolone once daily for 14 days at  
1528       doses of 0.25 mg/kg/day, 0.75 mg/kg/day, 2.0 mg/kg/day, and 6.0 mg/kg/day, 12 subjects  
1529       receiving vamorolone at each dose level. The drug was administered with a glass of  
1530       whole milk or other high-fat food. Six blood samples were collected on Day 1 and Day  
1531       14 at 0, 1, 2, 4, 6, and 8 hours post-dose and plasma was analyzed for vamorolone. The  
1532       time-course of plasma drug concentrations was assessed using noncompartmental  
1533       analytical (NCA) methods using the WinNonlin software (Certara).

1534       Of the 48 DMD subjects enrolled in the study (12 at each dosing level), 47 had evaluable  
1535       PK data. The average Day 1 and Day 14 vamorolone concentration versus time profiles  
1536       are shown in **Figure 8** for the four dose levels. Overall, as expected, higher doses  
1537       resulted in higher plasma concentrations of vamorolone. In particular, plasma  
1538       vamorolone concentrations versus time showed a rapid to moderate rate of absorption, a  
1539       maximum concentration ( $C_{max}$ ) at a  $T_{max}$  of 2 to 4 hours, and a decline phase with a  
1540       typical half-life ( $t_{1/2}$ ) of 2 hours. For all 4 doses, the mean PK profiles on Day 1 and  
1541       Day 14 appear similar. Many individual subjects had closely matching Day 1 and Day 14  
1542

1543  
1544  
1545  
1546  
1547  
1548

profiles, but several did not. There was no accumulation of drug owing to the relatively short half-life and once-daily (morning) dosing.

**Figure 8 Mean Plasma Concentrations of Vamorolone after Once Daily Oral Administration of 0.25, 0.75, 2.0, and 6.0 mg/kg Doses**

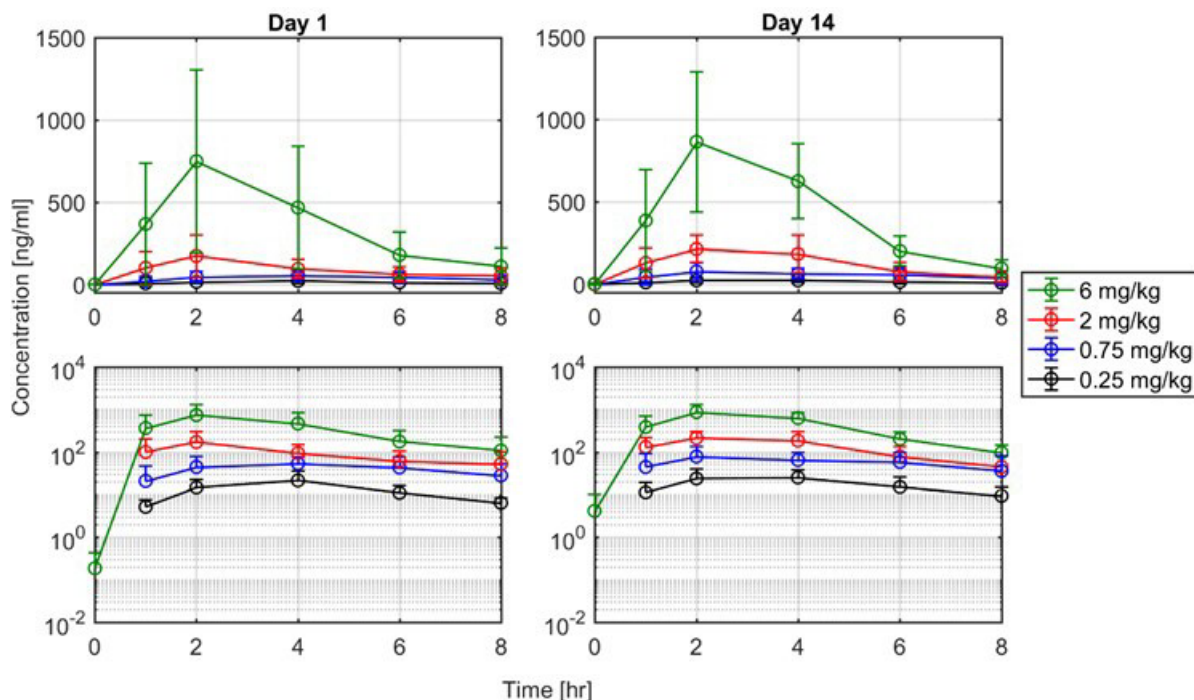

1549  
1550  
1551  
1552  
1553  
1554  
1555  
1556  
1557  
1558  
1559  
1560  
1561  
1562  
1563

Vamorolone concentrations shown as mean  $\pm$  standard deviation on linear (top panel) and semi-logarithmic (bottom panel) graphs.

A summary of the observed ( $C_{max}$  and  $T_{max}$ ) and calculated (AUC,  $t_{1/2}$ , and CL) PK parameters for all doses on Day 1 and Day 14 is provided in [Table 5](#). Even with only 6 blood samples collected from each subject, the PK profiles adequately capture the overall exposures, but must be considered approximate. This particularly applies to the peak values and the half-lives. Nevertheless, there is good consistency in the data with moderate variability as SD values are reasonable and the coefficient of variation values are typically less than 50%.

The drug is absorbed at a moderate rate with peak concentrations typically occurring at 2 to 4 hours on both Days 1 and 14. The median  $T_{max}$  across all doses is typically 2 or 4 hours. The half-lives were similar on both days, averaging about 2 hours, although some subjects had irregular profiles without a clear decline phase. The apparent clearance (CL

1564  
 1565  
 1566  
 1567  
 1568  
 1569  
 1570  
 1571  
 1572

and CL/F) values were consistent across the dose levels for Day 1 as well as for Day 14, but the latter tended to average slightly lower (about 2400 mL/hr/kg on Day 1 and 1900 mL/hr/kg on Day 14).

**Table 5. Summary of Pharmacokinetic Parameters for Vamorolone after Once Daily Oral Administration of 0.25, 0.75, 2.0 and 6.0 mg/kg Doses to DMD Boys**

| Parameters                    | Day 1           |               |               |               | Day 14          |               |             |                |
|-------------------------------|-----------------|---------------|---------------|---------------|-----------------|---------------|-------------|----------------|
|                               | Dose, mg/kg/day |               |               |               | Dose, mg/kg/day |               |             |                |
|                               | 0.25            | 0.75          | 2.0           | 6.0           | 0.25            | 0.75          | 2.0         | 6.0            |
| C <sub>max</sub> [ng/ml]      | 22.9 (13.4)     | 75.9 (25.9)   | 199 (111)     | 855.6 (471)   | 32.2 (15.2)     | 124.7 (42.5)  | 252.5 (96)  | 970 (270)      |
| T <sub>max</sub> [h]          | 3.6 [4] (1.2)   | 4.6 [4] (2.1) | 2.5 [2] (1.3) | 2.7 [2] (1.3) | 3.8 [4] (1.8)   | 3.8 [4] (2.2) | 2.8 [2] (1) | 2.3 [2] (0.86) |
| AUC <sub>inf</sub> [hr·ng/ml] | 118 (48)        | 379 (117)     | 761 (352)     | 3279 (1693)   | 164 (61)        | 544 (155)     | 1138 (467)  | 3606 (897)     |
| t <sub>1/2</sub> [h]          | 2.1 (0.85)      | 1.8 (0.43)    | 1.9 (0.79)    | 1.9 (0.95)    | 1.9 (0.96)      | 2.1 (0.8)     | 1.9 (1.02)  | 1.4 (0.35)     |
| CL [ml/hr/kg]                 | 2459 (897)      | 2285 (1103)   | 2697 (1285)   | 2320 (1375)   | 1828 (919)      | 1509 (482)    | 2047 (771)  | 1777 (476)     |

1573  
 1574  
 1575  
 1576  
 1577  
 1578  
 1579  
 1580  
 1581  
 1582

Values are mean (standard deviation) and for T<sub>max</sub>, which are shown as mean [median] (standard deviation).

An assessment of the linearity of the PK with dose using C<sub>max</sub> and AUC is shown in **Figure 9**. Data for all individual subjects were used which also depict the variability for each dose level. While larger doses appear to present greater variability, this is a visual size distortion as the standard deviation is similar at each dose level (**Table 5**). Fitting the power equation of the form (C<sub>max</sub>, AUC<sub>inf</sub> = a x Dose<sup>b</sup>) resulted in 95% confidence intervals for *b* values that include 1.0 for C<sub>max</sub> and AUC<sub>inf</sub> for both Days 1 and 14 indicative of linear relationships across this range of dose levels.

1583

1584  
1585

**Figure 9 Regression Analysis of  $C_{max}$  and  $AUC_{inf}$  versus Dose**

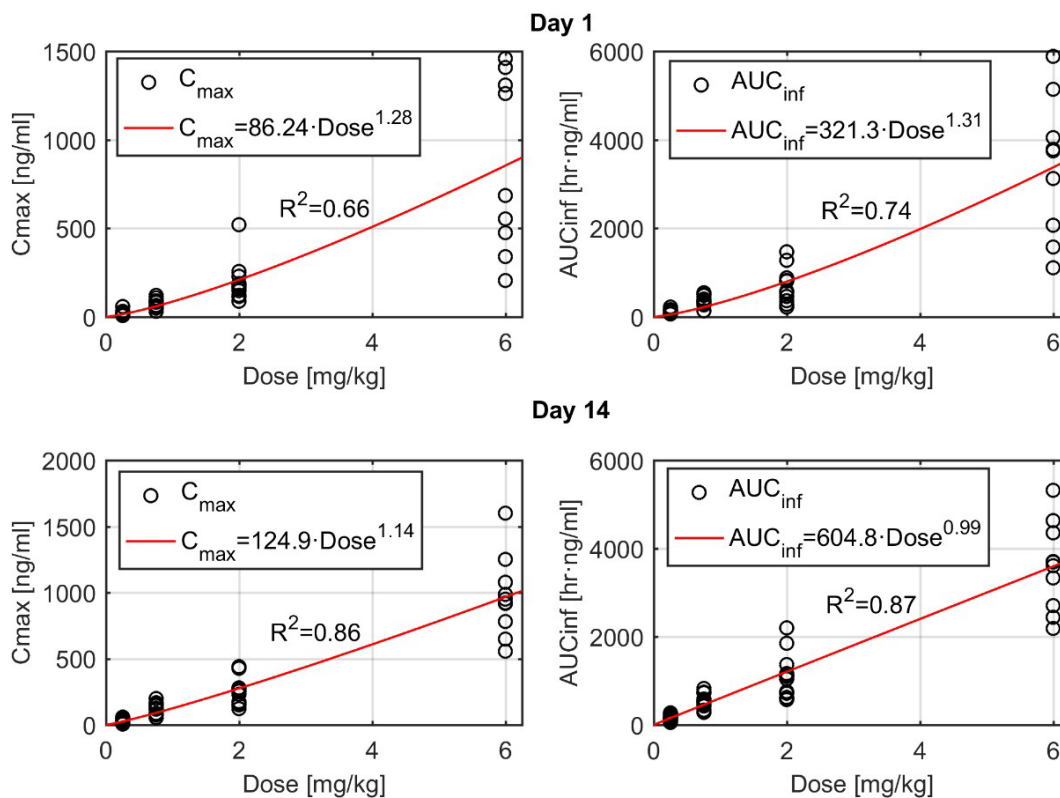

1586

Regression was performed by fitting the indicated power equations to the data for Day 1 and Day 14. The fitted parameters are shown in the figure boxes.

1587

1588

1589

Compared with fasting healthy adult volunteers ([Section 1.3.1](#)), the boys with DMD showed lower  $C_{max}$  values and more variation in the time to reach the maximal concentration of vamorolone for any given dose. This observation might be due to the fact that the boys with DMD received vamorolone after 8 ounces of whole milk or other high fat food and a so-called food effect might have played a role. The apparent clearance of vamorolone seems higher in the boys with DMD but this finding is not significant.

1590

1591

1592

1593

1594

1595

1596

### **1.3.3 Safety in Phase II Studies in 4 to 7 years Duchenne Muscular Dystrophy Boys (VBP15-002 and VBP15-003)**

1597

1598

*Adverse events:* There were no serious adverse events (SAEs) reported over the 14-day treatment in the Phase I clinical trial in healthy adult volunteers, nor in the four cohorts (0.25 mg/kg, 0.75 mg/kg, 2.0 mg/kg, and 6.0 mg/kg) of the Phase IIa study (VBP15-002; 14-day treatment) in boys ages 4 to <7 years with DMD. There were a total of 4 SAEs in

1599

1600

1601



1602  
1603  
1604  
1605  
1606  
1607  
1608  
1609  
1610  
1611  
1612  
1613  
1614  
1615  
1616  
1617  
1618  
1619  
1620  
1621  
1622  
1623  
1624  
1625  
1626  
1627  
1628  
1629  
1630  
1631  
1632  
1633  
1634

the Phase II VBP15-003 study and three SAEs to date in the VBP15-LTE extension study: two SAEs of pneumonia in two different subjects (both subjects receiving vamorolone 0.75 mg/kg/day), one SAE of bilateral testicular torsion and one SAE of hypoxia in the same subject receiving 6.0 mg/kg/day, one SAE of influenza associated dehydration in a subject receiving 6.0 mg/kg/day, and two SAEs of acute myoglobinuria in the same subject receiving 6.0 mg/kg/day. Each of these SAEs was considered unrelated to study drug, and none of them resulted in discontinuation from the study. In the VBP15-003 study, there were a total of 218 TEAEs among 42 of the 48 subjects (87.5%). In VBP15-003 study, the TEAEs with the highest incidence were viral upper respiratory tract infection (41.7%); pyrexia (35.4%); cough (18.8%); vomiting (14.6%); and diarrhea (10.4%).

*Body Mass Index (BMI):* Body Mass Index was measured throughout the VBP15-003 study. The mean change from baseline to Week 24 for BMI was 0.03, 0.20, 0.23, and 1.15 for the 0.25, 0.75, 2.0, and 6.0 mg/kg/day dose level groups, respectively. Body Mass Index increases generally reflect an increase in weight. Body Mass Index z-score was monitored in the VBP15-003 study. The mean change from baseline to Week 24 for BMI z-score for the 6.0 mg/kg/day group showed a statistically significant increase compared to the mean change from baseline to Week 24 for the 0.25 mg/kg/day and 0.75 mg/kg/day dose level groups. In contrast, the mean change from baseline to Week 24 for the 2.0 mg/kg/day dose level group in BMI z-score was minimal and comparisons with the other vamorolone dose level groups lacked statistical significance. The mean increase from baseline to Week 24 for BMI z-score was similar for the 6.0 mg/kg/day group and a daily prednisone-treated historical control group.

*Potential liver toxicity:* In the Phase I clinical trial in adult volunteers, vamorolone showed mild elevations of liver enzymes in one subject receiving 20.0 mg/kg in the fasted state, and dosing was halted. All DMD subjects have elevated serum ALT and AST enzymes because of the muscle condition. For that reason, two enzymes, glutamate dehydrogenase (GLDH) and gamma glutamyl transferase (GTT), that are preferentially expressed in liver were evaluated in the VBP15-003 study. None of the mean changes in GLDH from baseline to any of the VBP15-003 on-treatment assessment time points were

1635

1636

statistically significant for any dose level group. Although the mean changes from baseline to Week 8, Week 16, and Week 24 in GLDH levels did not show a dose response, shift analysis of GLDH levels did suggest a possible dose-related shift to higher GLDH levels at 2.0 mg/kg/day and 6.0 mg/kg/day at Weeks 16 and 24. Mean GGT levels and individual subject values at each VBP15-003 assessment time point across the four dose level groups remained at or below the normal range. On the basis of these mean GLDH and GGT data, vamorolone at dose levels up to 6.0 mg/kg/day does not appear to induce liver toxicity over a 24-week treatment period.

1637

1638

1639

1640

1641

1642

1643

1644

*Adrenal suppression:* In the VBP15-003 study, after 24 weeks of treatment, 0 of 8 tested participants (0.25 mg/kg/day), 1 of 12 (8.3%) tested participants (0.75 mg/kg/day), 5 of 12 (41.7%) tested participants (2.0 mg/kg/day), and 8 of 9 (88.9%) tested participants (6.0 mg/kg/day) had a depressed morning cortisol (<3.6 µg/dL [100 nM]) consistent with chronic adrenal suppression.<sup>29</sup>

1645

1646

1647

1648

1649

*Insulin resistance:* In the VBP15-003 study, mean changes from baseline for fasting insulin showed dose- and time-related changes for all dose level groups at Week 12 and Week 24. Statistical significance was observed for mean increase from baseline for the 6.0 mg/kg/day dose level group at Week 12 and Week 24.

1650

1651

1652

1653

1654

1655

1656

*Bone Turnover:* In the VBP15-003 study, pharmacodynamic biomarker testing for bone turnover markers suggested that vamorolone does not have the detrimental bone effects observed with prednisone and deflazacort.

1657

#### **1.4 Rationale for Study Design**

1658

1659

1660

1661

1662

1663

1664

1665

1666

The proposed Phase IIb clinical trial (VBP15-004) is designed as a pivotal study to show that vamorolone treatment over a Treatment Period of 24 weeks leads to superior improvements in strength and mobility versus placebo (efficacy), with a reduced adverse effect profile versus prednisone treatment (safety), and to demonstrate persistence of effect over a Treatment Period of 48 weeks. To determine efficacy, functional outcomes in DMD patient groups receiving one of two doses of vamorolone over 24 weeks will be compared to functional outcomes of DMD patients receiving placebo. To determine safety, body mass index (BMI) and PD safety biomarker findings in DMD patients

1667

1668 receiving one of two dose levels of vamorolone over 24 weeks will be compared to DMD  
1669 patients receiving prednisone. The two dose levels of vamorolone to be studied have  
1670 been chosen based upon data obtained in the Phase IIa and Phase II extension studies  
1671 (VBP15-002; VBP15-003).

1672 This Phase IIb study is a double-blind study of two dose levels of vamorolone, with  
1673 placebo and prednisone-treated control arms.

1674 Subjects who meet all eligibility criteria in this study (VBP15-004) will be randomized to  
1675 one of six treatment groups as shown in [Table 6](#).

1676

**Table 6. Study Randomization Schedule**

| Group | Planned Number of Subjects | Treatment Period #1 (24 Weeks) | Treatment Period #2 (20 Weeks) |
|-------|----------------------------|--------------------------------|--------------------------------|
| 1     | 30                         | Vamorolone, 2.0 mg/kg/day →    | Vamorolone, 2.0 mg/kg/day      |
| 2     | 30                         | Vamorolone, 6.0 mg/kg/day →    | Vamorolone, 6.0 mg/kg/day      |
| 3     | 15                         | Prednisone, 0.75 mg/kg/day →   | Vamorolone, 2.0 mg/kg/day      |
| 4     | 15                         | Prednisone, 0.75 mg/kg/day →   | Vamorolone, 6.0 mg/kg/day      |
| 5     | 15                         | Placebo →                      | Vamorolone, 2.0 mg/kg/day      |
| 6     | 15                         | Placebo →                      | Vamorolone, 6.0 mg/kg/day      |

1678 Evaluation of the two dose levels of vamorolone, prednisone, and placebo during the 24-  
1679 week Treatment Period #1 in this study will allow comparison of change from baseline in  
1680 safety parameters, muscle strength and functional efficacy parameters, and PD biomarker  
1681 levels over 24 weeks of treatment as compared to no treatment (placebo) or standard of  
1682 care treatment (prednisone). In particular, evaluation of change of the PD biomarkers  
1683 from baseline over a longer (24-week) period may aid in the clinical validation of  
1684 biomarkers which exhibit small changes over time. In addition, evaluation of the two  
1685 dose levels of vamorolone over the total 48-week period of the study will allow  
1686 assessment of the persistence of effect.

1687 The primary efficacy outcome is the Time to Stand (TTSTAND) from the floor  
1688 (velocity), and comparison will be made between the 6.0 mg/kg/day dose level of  
1689 vamorolone and the placebo group at Week 24. Multiple secondary and exploratory  
1690 efficacy outcomes will be measured, including TTSTAND, Time to Run/Walk 10 meters  
1691 (TTRW), Time to Climb four stairs (TTCLIMB), North Star Ambulatory Assessment

1692

1693

1694

1695

1696

1697

1698

1699

1700

1701

(NSAA), 6-Minute Walk Test (6MWT), Range of Motion test (ROM), and hand-held myometry (elbow flexors and knee extensors). Additional exploratory measures of efficacy include PD biomarkers that have previously been shown to be glucocorticoid-responsive in DMD boys and inflammatory bowel disease in children.<sup>31</sup> Moreover, physical functioning, behavior, neuropsychology, and satisfaction with treatment will be measured as exploratory outcomes using the parent proxy-report of Pediatric Outcomes Data Collection Instrument (PODCI), PARS III, Treatment Satisfaction Questionnaire (TSQM), and Ease of Study Medication Administration Assessment for the study medication suspension, respectively.

1702

1703

1704

1705

For the safety measure of body mass index (BMI) z-score, comparisons will be made between each dose level of vamorolone and the prednisone-treated group. Additional secondary safety measures are serum biomarkers bridged to later clinical safety concerns. These include:

1706

1707

1708

1709

1710

1711

1712

1713

1714

1715

1716

1717

1718

1719

1. **Adrenal suppression.** Pharmacological doses of glucocorticoids cause suppression of the hypothalamo-pituitary-adrenal axis, leading to low concentration of endogenous cortisol and other steroidal hormones in serum. Adrenal suppression is directly associated with risk of adrenal crisis, delay of puberty and stunting of growth. Measurement of morning cortisol concentrations will reflect the degree of adrenal suppression. Plasma cortisol secretion typically follows a circadian pattern with the highest concentrations early in the morning; a morning serum cortisol concentration less than 3.6 µg/dL (or 100 nM) is highly suggestive of adrenal suppression. A single cortisol measurement at other times of the day is of limited value and dynamic testing with Cosyntropin (a synthetic peptide of ACTH, also known as tetracosactide) is a standard approach to the assessment of endogenous cortisol production.<sup>32</sup> Serum cortisol levels less than 18 µg/dL (500 nM) 30 or 60 minutes after stimulation with Cosyntropin (250 µg) are considered diagnostic of adrenal suppression.

1720

1721

2. **Bone turnover.** Pharmacological doses of glucocorticoids cause an imbalance of bone formation and bone resorption, leading to later osteopenia and bone

1722

1723

fragility.<sup>33</sup> Bone fragility is a significant adverse effect of chronic pharmacologic

1724

glucocorticoids in DMD as this can lead to fracture, which increases the

1725

likelihood of premature loss of ambulation. Serum biomarkers that have been

1726

bridged to later clinical outcomes of osteopenia are osteocalcin (bone formation;

1727

glucocorticoids decrease serum levels), and CTX1 (bone resorption;

1728

glucocorticoids increase serum levels). Decreases of osteocalcin and increases of

1729

CTX1 are reflective of abnormal bone turnover, a risk factor bridged to later

1730

bone fragility.

1731

3. **Insulin resistance.** Insulin resistance is the term where increased blood glucose

1732

triggers increased insulin secretion from the pancreatic islet cells, but the

1733

elevated serum insulin fails to sufficiently trigger glucose uptake by muscle

1734

and/or liver. Thus, peripheral tissues are resistant to insulin signaling (insulin

1735

resistance). Insulin resistance has been bridged to later clinical outcomes,

1736

including heart disease, type 2 diabetes, and vascular disease. Serum biomarkers

1737

that are accepted as measures of insulin resistance are increased serum glucose

1738

and insulin. This can be measured after acute (hours after first dose) or chronic

1739

(after weeks or months of dosing) glucocorticoid treatment.

1740

Additional exploratory safety outcomes are measures of additional serum safety

1741

biomarkers that have been defined in glucocorticoid-treated DMD and inflammatory

1742

bowel disease patients.

1743

This trial will be conducted in compliance with this protocol, and in accordance with the

1744

ethical principles that have their origin in the Declaration of Helsinki, and that are

1745

consistent with Good Clinical Practice (GCP) and the applicable regulatory requirements,

1746

and the recently issued FDA guidance on developing drugs for treatment for DMD and

1747

related dystrophinopathies.<sup>34</sup>

1748

It is obligatory that the Investigator become familiar with all sections of the vamorolone

1749

Investigator's Brochure.<sup>29</sup>

1750

1751 **1.5 Overall Benefit/Risk**

1752

1753

1754

1755

1756

1757

1758

1759

1760

1761

1762

1763

1764

1765

1766

1767

1768

1769

It is anticipated that the adverse effect profile of the investigational product will be more favorable than standard of care glucocorticoids in the long term. There has been a total of 11 SAEs in the vamorolone program to date: a total of 4 SAEs in the VBP15-003 study, a total of 3 SAEs in the VBP15-LTE study, a total of 3 SAEs in the VBP15-004 study, and 1 SAE in the VBP15-EAP program. There have been two SAEs of pneumonia in two different subjects (both subjects receiving vamorolone 0.75 mg/kg/day); one SAE of bilateral testicular torsion and one SAE of hypoxia in the same subject receiving 6.0 mg/kg/day; one SAE of influenza associated dehydration in a subject receiving 6.0 mg/kg/day; two SAEs of acute myoglobinemia in the same subject receiving 6.0 mg/kg/day; one SAE of viral gastroenteritis with secondary dehydration in a subject receiving blinded study drug; one SAE of asthma exacerbation in the setting of respiratory syncytial virus and bronchiolitis in a subject receiving vamorolone at either 2.0 mg/kg/day or 6.0 mg/kg/day; one SAE of perforated appendicitis occurring with 30 days after the subject completed the VBP15-004 study, and one SAE of viral gastroenteritis requiring hospitalization for hydration. Each of these SAEs was considered unrelated to study drug, and none of them resulted in discontinuation from the study.

1770

1771

1772

1773

1774

1775

1776

1777

1778

In the Phase I clinical trial in adult volunteers, vamorolone showed mild elevations of liver enzymes in one subject receiving 20.0 mg/kg in the fasted state. One subject participating in VBP15-004 developed an AE of acute cholestatic hepatitis manifested by elevated transaminases, direct bilirubin, ALP and GGT during Treatment Period #1 and after study drug interruption and restart, redeveloped acute cholestatic hepatitis in Treatment Period #2. Unblinding of the treatment assignment for this subject, to facilitate decisions regarding subsequent standard of care corticosteroid therapy, indicated that the subject had been on vamorolone 6.0 mg/kg/day in both Treatment Period #1 and Treatment Period #2.

1779

1780

In the VBP15-002 study, after 2 weeks of treatment, 0 of 11 tested participants who received vamorolone 0.25 mg/kg/day, 0 of 11 tested participants who received

1781  
1782 vamorolone 0.75 mg/kg/day, 2 of 11 (18.2%) tested participants who received  
1783 vamorolone 2 mg/kg/day, and 6 of 10 (60.0%) tested participants who received  
1784 vamorolone 6 mg/kg/day had a depressed morning cortisol (<3.6 µg/dL [100 nmol/L])  
1785 consistent with chronic adrenal suppression. In the VBP15-003 study, after 24 weeks of  
1786 treatment, 0 of 8 tested participants (0.25 mg/kg/day), 1 of 12 (8.3%) tested participants  
1787 (0.75 mg/kg/day), 5 of 12 (41.7%) tested participants (2.0 mg/kg/day), and 8 of 9 (88.9%)  
1788 tested participants (6.0 mg/kg/day) had a depressed morning cortisol (<3.6 µg/dL  
1789 [100 nM]) consistent with chronic adrenal suppression. Instructions for detecting adrenal  
1790 crisis and the circumstances in which stress dose steroids should be provided will be  
1791 included in the Informed Consent Form (ICF) and Manual of Operations, and  
1792 Investigators should monitor clinical study participants closely to identify elevations in  
1793 liver-specific enzymes.

1794 *Potential Health Benefits:* Subjects may or may not receive direct health benefit from  
1795 participating in the study. Some subjects will be randomly assigned to vamorolone at one  
1796 of two planned dose levels (2.0 mg/kg/day and 6.0 mg/kg/day) over the course of the  
1797 48-week trial. In the VBP15-003 study, clinical efficacy was assessed by Timed  
1798 Function Tests. Improvement in Time to Stand, Time to Climb, Time to Run/Walk  
1799 10 Meters, and 6-Minute Walk Test were seen predominantly for the 2.0 and  
1800 6.0 mg/kg/day dose level groups, with many of the improvements showing statistical  
1801 significance compared to an untreated Duchenne Natural History Group. In view of the  
1802 initial clinical evidence of safety, the improvements observed in the assessments of  
1803 efficacy, and the nature of potential adverse effects that can be monitored, the data  
1804 support an acceptable benefit/risk profile for vamorolone.

## 1805 **2 STUDY OBJECTIVES AND ENDPOINTS**

### 1806 **2.1 Study Objectives**

#### 1807 **2.1.1 Primary Objectives**

1808  
1809 The primary objectives of this study are:  
1810  
1811

1812

1813

1. To compare the efficacy of vamorolone administered orally at daily doses of

1814

6.0 mg/kg over a 24-week treatment period vs. placebo in ambulant boys ages 4 to

1815

<7 years with DMD; and

1816

1817

2. To evaluate the safety and tolerability of vamorolone administered orally at daily

1818

doses of 2.0 mg/kg and 6.0 mg/kg in ambulant boys ages 4 to <7 years with

1819

DMD.

1820

### **2.1.2 Secondary Objectives**

1821

The secondary objectives of this study are:

1822

1823

1824

1. To compare the efficacy of vamorolone administered orally at daily doses of

1825

2.0 mg/kg over a 24-week treatment period vs. placebo in ambulant boys ages 4 to

1826

<7 years with DMD;

1827

2. To compare the safety of vamorolone administered orally at daily doses of

1828

2.0 mg/kg and 6.0 mg/kg over a 24-week treatment period vs. daily prednisone

1829

0.75 mg/kg in ambulant boys ages 4 to <7 years with DMD;

1830

1831

3. To compare the efficacy of vamorolone administered orally at daily doses of

1832

2.0 mg/kg and 6.0 mg/kg over a 24-week treatment period vs. daily prednisone

1833

0.75 mg/kg in ambulant boys ages 4 to <7 years with DMD;

1834

1835

4. To compare the efficacy of vamorolone administered orally at daily doses of

1836

2.0 mg/kg and 6.0 mg/kg over a 48-week treatment period in ambulant boys ages

1837

4 to <7 years with DMD vs. untreated DMD historical controls;

1838

5. To compare the safety of vamorolone administered orally at daily doses of

1839

2.0 mg/kg and 6.0 mg/kg over a 48-week treatment period in ambulant boys ages

1840

4 to <7 years with DMD vs. prednisone-treated DMD historical controls; and

1841

6. To evaluate the population pharmacokinetics of vamorolone administered orally

1842

at daily doses of 2.0 mg/kg and 6.0 mg/kg in ambulant boys ages 4 to <7 years

1843

with DMD.



1844

1845 **2.1.3 Exploratory Objectives**

1846

1847 The exploratory objectives of this study are:

1848

1849

1850

1851

1. To evaluate the satisfaction with treatment of vamorolone administered orally at daily doses of 2.0 mg/kg and 6.0 mg/kg over a 24-week treatment period vs. daily prednisone 0.75 mg/kg in ambulant boys ages 4 to <7 years with DMD;

1852

1853

1854

1855

2. To evaluate the effect of vamorolone administered orally at daily doses of 2.0 mg/kg and 6.0 mg/kg over a 24-week treatment period vs. daily prednisone 0.75 mg/kg on behavior and neuropsychology;

1856

1857

1858

3. To evaluate the effect of vamorolone administered orally at daily doses of 2.0 mg/kg and 6.0 mg/kg over a 24-week treatment period vs. placebo on physical functioning;

1859

1860

4. To assess the ease of administration of the study medication suspension to ambulant boys ages 4 to <7 years with DMD;

1861

1862

1863

1864

1865

5. To compare the effects of vamorolone administered orally at daily doses of 2.0 mg/kg and 6.0 mg/kg over a 24-week treatment period vs. placebo on potential serum PD biomarkers of safety and efficacy in ambulant boys ages 4 to <7 years with DMD;

1866

1867

1868

1869

6. To compare the effects of vamorolone administered orally at daily doses of 2.0 mg/kg and 6.0 mg/kg over a 24-week treatment period vs. daily prednisone 0.75 mg/kg on potential serum PD biomarkers of safety and efficacy in ambulant boys ages 4 to <7 years with DMD; and

1870

1871

1872

1873

7. To determine if candidate genetic modifiers of DMD (gene polymorphisms associated with disease severity, or response to glucocorticoid treatment) are similarly associated with vamorolone-treated DMD subjects (baseline disease severity, or response to vamorolone or prednisone treatment).

1874

1875

## 2.2 Study Endpoints

1876

1877

### 2.2.1 Safety Endpoints

1878

1879

1. BMI z-score: Change from baseline to each of the scheduled on-treatment and post-treatment assessment time points;

1880

1881

2. Treatment-emergent adverse events (TEAEs) and serious adverse events (SAEs) by system organ class (SOC): Overall by treatment, by treatment and relationship, and by treatment and intensity (see [Section 7.5](#));

1882

1883

1884

3. Vital signs (sitting blood pressure, heart rate, respiratory rate, and body temperature): Change from baseline to each of the scheduled on-treatment and post-treatment assessment time points;

1885

1886

1887

4. Body weight and height: Change from baseline to each of the scheduled on-treatment and post-treatment assessment time points;

1888

1889

5. Cushingoid features: Change from baseline to each of the scheduled on-treatment and post-treatment assessment time points (changes from baseline will be recorded as AEs);

1890

1891

1892

6. Clinical laboratory values: Change from baseline to each of the scheduled on-treatment and post-treatment assessment time points in:

1893

1894

- Hematology and clinical chemistry

1895

1896

- Lipid profile (triglycerides, total cholesterol, low density lipoprotein [LDL], high density lipoprotein [HDL])

1897

1898

- Vitamin D level

1899

1900

- Urinalysis;

1901

1902

7. 12-lead electrocardiogram (ECG): Change from baseline to each of the scheduled on-treatment and post-treatment assessment time points;

1903

1904

8. 2D-echocardiogram: Change from baseline to Week 24 and Week 48;

1905

1906

9. Dual-energy x-ray absorptiometry (DXA) scan: Change from baseline to Week 24 and Week 48 in spine BMD, total body BMD, spine and total body bone mass, and total body composition (lean mass, fat mass, fat-free mass, Lean Mass Index, and Fat Mass Index);

1910

10. Spine x-rays: Change from baseline to Week 24 assessment;

1911

1912

11. Eye examination for detection of clinically significant abnormalities (cataracts and/or glaucoma) at Week 24 and Week 48 assessments compared to baseline;

1913

1914

12. ACTH Stimulation Test: measure of adrenal suppression at Week 24 and Week 48. Percentage of subjects in each treatment group with cortisol levels  $<18$   $\mu\text{g/dL}$  (or 500 nM) 30 or 60 minutes after stimulation with Cosyntropin;

1915

1916

1917

13. Linear growth velocity: Change from baseline to each of the scheduled on-treatment and post-treatment assessment time points in height percentile for age.

1918

1919

1920

Data for the following additional safety outcomes will be listed only:

1921

1922

1. Physical examination findings at each of the pretreatment, on-treatment, and post-treatment assessment time points.

1923

1924

2. Fracture Questionnaire results at pretreatment, Week 24, and Week 48.

1925

1926

### ***Tolerability Endpoint***

1927

1. Premature discontinuations of study treatment due to adverse events.

1928

1929

1930

### ***2.2.2 Clinical Efficacy Endpoints***

1931

#### ***Primary Clinical Efficacy Endpoint***

1932

1. Time to Stand Test (TTSTAND) velocity (rise/second): Comparison of the vamorolone 6.0 mg/kg/day dose level group versus the placebo group in change from baseline to the Week 24 assessment.

1933

1934

1935

#### ***Secondary Efficacy Endpoints***

1936

1. Change from baseline to Week 24 for the following comparisons:

1937

1938

1939

- TTSTAND velocity, vamorolone 2.0 mg/kg/day vs placebo

1940

1941

- 6 Minute Walk Test (6MWT) meters walked, vamorolone 6.0 mg/kg/day vs. placebo

1942

1943

- 6 Minute Walk Test (6MWT) meters walked, vamorolone 2.0 mg/kg/day vs. placebo

1944

1945

- Time to Run/Walk (TTRW) 10 meters velocity, vamorolone 6.0 mg/kg/day vs. placebo

1946

1947

- Time to Run/Walk (TTRW) 10 meters velocity, vamorolone 2.0 mg/kg/day vs. placebo

1948

1949

- 6MWT meters walked, vamorolone 6.0 mg/kg/day vs. prednisone

1950

1951

- 6MWT meters walked, vamorolone 2.0 mg/kg/day vs. prednisone

1952

1953

2. Change from baseline to each of the scheduled study assessment time points for each treatment group up to Week 48 for:

1954

1955

- Time to Stand Test (TTSTAND) velocity (rise/second);

1956

1957

- Time to Climb (4 Steps) Test (TTCLIMB) velocity (tasks/second);

1958

1959

- Time to Run/Walk Test (TTRW) velocity (meters/second) to complete 10 meters of a 14 meter course;

1960

1961

- Total distance traveled, in meters, in completing the Six-minute Walk Test (6MWT);

1962

1963

- North Star Ambulatory Assessment (NSAA);

1964

1965

- Hand-held myometry (elbow flexors and knee extensors); and

1966

1967

- Range of motion in the ankles (ROM).

1968

1969

### ***Exploratory Efficacy Endpoints***

1970

1971

1. Change from baseline to each of the scheduled study assessment time points up to and including Week 24 for the following comparisons:

1972

- 1973
- 1974
- 1975
- 1976
- 1977
- 1978
- 1979
- 1980
- 1981
- 1982
- 1983
- 1984
- 1985
- 1986
- 1987
- 1988
- 1989
- 1990
- 1991
- 1992
- 1993
- 1994
- 1995
- 1996
- 1997
- 1998
- 1999
- TTSTAND velocity, vamorolone 6.0 mg/kg/day vs placebo (Week 6 and 12 only)
  - TTSTAND velocity, vamorolone 2.0 mg/kg/day vs placebo (Week 6 and 12 only)
  - 6 Minute Walk Test (6MWT) meters walked, vamorolone 6.0 mg/kg/day vs. placebo (Week 12 only)
  - 6 Minute Walk Test (6MWT) meters walked, vamorolone 2.0 mg/kg/day vs. placebo (Week 12 only)
  - Time to Run/Walk (TTRW) 10 meters velocity, vamorolone 6.0 mg/kg/day vs. placebo (Week12 only)
  - Time to Run/Walk (TTRW) 10 meters velocity, vamorolone 2.0 mg/kg/day vs. placebo (Week12 only)
  - 6MWT meters walked, vamorolone 6.0 mg/kg/day vs. prednisone (Week 12 only)
  - 6MWT meters walked, vamorolone 2.0 mg/kg/day vs. prednisone (Week 12 only)
  - NSAA total score, vamorolone 6.0 mg/kg/day vs. placebo
  - NSAA total score, vamorolone 2.0 mg/kg/day vs. placebo
  - Hand-held Myometry knee extensors, vamorolone 6.0 mg/kg/day vs. placebo
  - Hand-held Myometry knee extensors, vamorolone 2.0 mg/kg/day vs. placebo
  - Hand-held Myometry elbow extensors, vamorolone 6.0 mg/kg/day vs. placebo
  - Hand-held Myometry elbow extensors, vamorolone 2.0 mg/kg/day vs. placebo
  - TTCLIMB velocity, vamorolone 6.0 mg/kg/day vs. placebo
  - TTCLIMB velocity, vamorolone 2.0 mg/kg/day vs. placebo
  - ROM in the ankles, vamorolone 6.0 mg/kg/day vs. placebo
  - ROM in the ankles, vamorolone 2.0 mg/kg/day vs. placebo

2000

2001

### 2.2.3 *Additional Exploratory Endpoints*

2002

2003

1. Treatment satisfaction questionnaire (TSQM): Comparison of each vamorolone dose level group to the prednisone group at the Week 24 visit; comparison of each treatment group at the Week 48 visit;

2004

2005

2006

2. Pediatric Outcomes Data Collection Instrument (PODCI): Comparison of each vamorolone dose level group to the placebo group for change from baseline to the Week 24 assessment; comparison of each treatment group for change from baseline to the Week 48 assessment;

2007

2008

2009

2010

3. Behavioral changes (PARS III): Comparison of each vamorolone dose level group to the prednisone group and to the placebo group for change from baseline to each of the scheduled study assessment time points up to the Week 24 assessment; comparison of each treatment group for change from baseline to the Week 48 assessment;

2011

2012

2013

2014

2015

4. Ease of study medication administration (Question 1 only: tablet vs liquid) assessed at each of the scheduled study assessment time points;

2016

2017

5. Blindedness Assessment at each of the scheduled study assessment time points; and

2018

2019

6. DNA testing for candidate genetic modifiers of DMD.

2020

2021

### 2.2.4 *Pharmacodynamic Endpoints*

2022

2023

1. The following pharmacodynamic biomarkers are considered secondary outcome measures focusing on safety outcomes. In each case, the biomarkers studied reflect safety concerns of glucocorticoids:

2024

2025

2026

- a. Adrenal suppression. First-in-morning serum cortisol levels will be measured. Cortisol measures falling below 3.6 µg/dL (or 100 nM) will be considered to be indicative of the development of adrenal suppression. ACTH Stimulation Test will be performed at the Screening Visit and at the Week 24 Follow-up Visit (48 ± 3 hours after the final dose of Treatment Period #1 study medication) and at the Week 48 Follow-up

2027

2028

2029

2030

2031

2032  
2033  
2034  
2035  
2036  
2037  
2038  
2039  
2040  
2041  
2042  
2043  
2044  
2045  
2046  
2047  
2048  
2049  
2050  
2051  
2052  
2053  
2054  
2055  
2056  
2057  
2058  
2059  
2060

Visit ( $48 \pm 3$  hours after the final dose of Treatment Period #2 study medication): cortisol levels  $<18 \mu\text{g/dL}$  (or  $500 \text{ nM}$ ) 30 or 60 minutes after stimulation with Cosyntropin ( $250 \mu\text{g}$ ) will be considered to be indicative of adrenal suppression.

- b. Bone turnover. Measures of serum osteocalcin are reflective of bone formation, and measures of serum CTX1 are reflective of bone reabsorption. Levels of osteocalcin and CTX1 predict later clinical safety concerns of osteopenia and bone fragility.
- c. Insulin resistance. Glucocorticoids cause both acute and chronic insulin resistance, with serum elevations of both insulin and glucose. Measures of hyperinsulinemia and hyperglycemia are accepted measures of insulin resistance.

2. Exploratory biomarkers for aspects of safety and efficacy<sup>31</sup>

**2.2.5 Endpoints for Patient-Reported Outcomes**

Safety endpoints based on subject reports of AEs are listed in [Section 2.2.1](#).

The parent/legal guardian of each subject will be asked to assess the ease of administration of the study medication suspension (see [Section 7.4.4](#)).

Additionally, subjects' parents/legal guardians will be asked to complete the PODCI (see [Section 7.4.1](#)). Satisfaction with treatment will be measured using the Treatment Satisfaction Questionnaire (TSQM) which also will be completed by the parent/legal guardian (see [Section 7.4.2](#)). Additionally, the PARS III behavioral assessment will be completed by the parent/guardian (see [Section 7.4.3](#)). Finally, the subject's parent/legal guardian will complete a Blindedness Assessment at the Week 24 Visit (see [Section 7.4.5](#)).

No other patient-reported outcomes are planned.

2061  
2062  
2063  
2064  
2065  
2066  
2067  
2068  
2069  
2070  
2071  
2072  
2073  
2074  
2075  
2076  
2077  
2078  
2079  
2080  
2081  
2082  
2083  
2084  
2085  
2086  
2087  
2088  
2089  
2090  
2091  
2092

### 3 STUDY DESIGN

#### 3.1 Overall Study Design

This Phase IIb study is a randomized, double-blind, parallel group, placebo- and active-controlled study with double-blind extension to evaluate the long-term efficacy, safety, tolerability, PD, and population PK of vamorolone (the investigational medicine) compared to prednisone (active control) and placebo over a Treatment Period of 24 weeks in boys ages 4 to <7 years with DMD, and determine the persistence of effect over a total Treatment Period of 48 weeks. Six treatment groups will receive either vamorolone at one of two doses (2.0 mg/kg or 6.0 mg/kg), prednisone (0.75 mg/kg), or placebo once daily for 24 weeks, and will receive vamorolone at one of two doses (2.0 mg/kg or 6.0 mg/kg) daily for an additional 20 weeks. A total of approximately 120 subjects will be randomized into the study as shown in [Table 6](#).

To maintain the blind during Treatment Period #1, matched suspension (vamorolone or placebo) and matched tablets (prednisone or placebo) will be administered. Each subject will receive a dose of suspension (vamorolone or placebo) and tablets (prednisone and placebo) once daily during Treatment Period #1. The number of tablets and volume of suspension per dose will be determined by body weight.

The study is comprised of a Pretreatment Screening Period of up to 32 days duration, a 1-day Pretreatment Baseline Period, a 24-week Treatment Period #1, a 4-week Transition Period, a 20-week Treatment Period #2, and a 4-week Dose-tapering Period. Subjects will be enrolled into this study at the time written informed consent is given, and randomized to treatment only after completion of all Pretreatment Screening assessments.

Study drug dosing will occur from Day 1 until the Week 48 Visit ([Section 5.3](#)). Study drug dosing will occur at home on all days except the Day 1, Week 2, Week 12, Week 24, Week 28, Week 30, Week 40, and Week 48 study visits, when dosing will occur at the study site.

Subjects will be assessed for safety and tolerability, clinical efficacy, PD, and population PK at scheduled visits throughout the study (see [Section 6](#) for a schedule of study assessments). Treatment Period #1, Transition Period, and Treatment Period #2 study



2093  
2094  
2095  
2096  
2097  
2098  
2099  
2100  
2101  
2102  
2103  
2104  
2105  
2106  
2107  
2108  
2109  
2110  
2111  
2112  
2113  
2114  
2115  
2116  
2117  
2118  
2119  
2120  
2121  
2122

visits will occur at Day 1, Week 2, Week 6, Week 12, Week 18, Week 24, Week 28, Week 30, Week 34, Week 40 and Week 48 (**Table 11**); all subjects will return to the clinical site for a Week 24 Follow-up Visit and for a Week 48 Follow-up Visit,  $48 \pm 3$  hours after administration of the final dose of Treatment Period #1 and Treatment Period #2 study medication, respectively, for ACTH Stimulation testing. Adverse events, including SAEs, and concomitant medications will be recorded throughout the study.

Subject diaries will be dispensed at the Day 1 Visit and at each study visit thereafter through Week 48 to record AEs, changes to concomitant medications taken during the study, and any missed or incomplete doses of study medication.

There is flexibility in the timing of completion of some of the scheduled Week 24 and Week 48 assessments. The scheduled physical examination, weight, vital signs, clinical laboratory tests, blood draws for PD biomarker analysis, blood draw for DNA testing (Week 24 only), Ease of Study Medication Administration Assessment, PODCI, PARS III, and functional assessments (TTSTAND, TTCLIMB, TTRW, NSAA, 6MWT, hand-held myometry, ROM) must all be performed on the date of the Week 24 or Week 48 dose of study medication. The 12-lead ECG may be performed on the date of the Week 24 or Week 48 dose of study medication, the day following the Week 24 or Week 48 dose of study medication, or the day of the Week 24 or Week 48 Follow-up Visit. For the Week 24 assessments, completion of the DXA scan, spine X-rays, Fracture Questionnaire, 2-D echocardiography, eye examination, TSQM, and Blindedness Assessment may be performed up to 7 days following the date of the Week 24 dose of study medication to accommodate need for additional scheduling flexibility. For the Week 48 assessments, completion of the DXA scan, Fracture Questionnaire, 2-D echocardiography, eye examination, and TSQM may be performed on the date of the final Week 48 dose of study medication, the day following the Week 48 dose of study medication, or the day of the Week 48 Follow-up Visit for subjects who will receive additional vamorolone therapy by enrolling directly into an additional vamorolone study or general access program, or up to 7 days following the date of the final Week 48 dose of study medication for subjects participating in the Dose-tapering Period.

2123

2124 A Transition Period of 4 weeks in duration follows the end of Treatment Period #1 for all  
2125 subjects. During this Transition Period, all subjects will continue to receive the liquid  
2126 formulation (vamorolone 2.0 mg/kg or 6.0 mg/kg, or matching placebo) they received  
2127 during Treatment Period #1 and will be tapered off their study medication tablets  
2128 (prednisone or matching placebo). Site study staff will contact the parent(s)/guardian(s)  
2129 by telephone at Week 26 to ensure that the tablet tapering is proceeding according to  
2130 protocol, to assess potential signs or symptoms indicative of adrenal suppression, and to  
2131 address any questions the parent(s)/guardian(s) may have. All subjects will return to the  
2132 clinical site for the Week 28 assessments, prior to receiving their first dose of Treatment  
2133 Period #2 study medication on the day after the Week 28 Visit (Week 28 + 1 day) (see  
2134 [Section 6.3.6](#)).

2135 Subjects who complete the VBP15-004 study assessments through the Week 48 Visit and  
2136 Week 48 Follow-up Visit may be given access to vamorolone through an additional study  
2137 or general access program, or given the option to transition to standard of care treatment  
2138 (including glucocorticoids) for DMD. Standard of care treatment for DMD may be  
2139 offered to the subject following completion of the Phase IIb VBP15-004 study, if the  
2140 subject's parent or guardian does not wish to enroll the subject in the additional  
2141 vamorolone study or general access program and/or the Investigator feels it to be in the  
2142 best interest of the subject.

2143 Subjects who will enroll directly into the additional vamorolone study or general access  
2144 program to continue vamorolone treatment will be discharged from the VBP15-004 study  
2145 following completion of all Week 48 assessments and the Week 48 Follow-up Visit  
2146 ACTH Stimulation Test. Subjects who will not continue vamorolone treatment in the  
2147 additional vamorolone study or general access program, including those subjects who  
2148 will transition to standard of care treatment for DMD, will have their vamorolone dose  
2149 tapered during a 4-week Dose-tapering Period, prior to discharge from the study. Site  
2150 study staff will contact the parent(s)/guardian(s) by telephone at Week 50 to ensure that  
2151 the dose tapering is proceeding according to protocol (see [Section 6.3.7](#)), to assess  
2152 potential signs or symptoms of adrenal suppression, and to address any questions the  
2153 parent(s)/guardian(s) may have.

2154

2155 In the event that any clinical or laboratory parameters remain abnormal at the time of  
2156 discharge from the study, the subject will be followed medically, as clinically indicated.

2157 Any subject who discontinues the study prior to the Week 24 Visit should return to the  
2158 study unit for scheduled Week 24 assessments and the Week 24 Follow-up Visit ACTH  
2159 Stimulation Test at the time of early withdrawal, whenever possible; any subject who  
2160 prematurely discontinues the study after Week 24 but prior to Week 28 should complete  
2161 the scheduled Week 28 assessments at the time of early withdrawal, whenever possible;  
2162 and any subject who prematurely discontinues the study after Week 28 but prior to Week  
2163 48 should complete the scheduled Week 48 assessments and the Week 48 Follow-up  
2164 Visit ACTH Stimulation Test at the time of early withdrawal, whenever possible,  
2165 assuming the subject has not withdrawn consent. Any subject who withdraws early from  
2166 the study should undergo Early Discontinuation Dose-tapering (see [Section 6.4](#)).

### 2167 **3.2 Randomization**

2168

2169 Following consent and review of study entry criteria to confirm subject eligibility for the  
2170 study, the subject can be randomized to treatment. Randomization should be performed  
2171 at least 10 days prior to the baseline visit and will be achieved via the Interactive  
2172 Voice/Web Response System (IXRS) system with user name and password access.  
2173 Randomization will be stratified by participant's age (<6 vs. ≥ 6 years). Randomization  
2174 will be stratified only by age; randomization will not be stratified by investigational site.  
2175 Randomization will require the site investigator, or designee, to verify that the subject  
2176 meets the inclusion/exclusion criteria of the study, and to verify that the child has not  
2177 previously been randomized. The following information will need to be entered into the  
2178 IXRS system in order to assign the subject to a treatment group and the appropriate age  
2179 stratification group:

2180

- Participant's Study Subject Identification Number

2181

- Participant's Date of Birth

2182

2183

- Participant's weight, as recorded at the Screening Visit.

2184

2185  
2186  
2187  
2188  
2189  
  
2190  
2191  
2192  
2193  
  
2194  
2195  
2196  
  
2197  
2198  
2199  
2200  
2201  
2202  
2203  
  
2204  
2205  
2206  
2207  
2208  
2209  
2210  
2211  
  
2212  
2213  
2214  
2215

When the site investigator/designee completes the randomization procedures via the IXRS system, an e-mail report with the randomization number and age stratification group will be generated and sent to the clinical trials supply company confirming randomization into the trial.

The randomization number will be assigned by the IXRS system and will only be used for study drug supply and shipment. Once the information has been received, the clinical trials supply company will prepare a subject-specific kit of study medication and ship it to the pharmacy at the study site.

Randomization procedures should be completed at least 10 days prior to the Baseline Visit in order to allow study drug supply to be shipped to the site in time to be dispensed to the participant by the site investigator for Day 1 dosing.

### **3.3 Blinding**

To achieve double-blinding, the supplies company will manufacture identical liquid formulations for vamorolone and placebo, and identical tablet formulation for prednisone and placebo. Each dose of study medication will consist of doses of both a liquid formulation (vamorolone or placebo) and tablets (prednisone or placebo) through Week 28, and liquid formulation only following Week 28 through Week 48 (see [Table 7](#)).

To blind the liquid formulation, the supplies company will manufacture 1.33% and 4.0% wt/wt vamorolone suspension formulations, and placebo suspension formulation, identical in appearance. Subjects who are randomized to receive vamorolone 2.0 mg/kg will receive the 1.33% vamorolone suspension, and subjects who are randomized to receive vamorolone 6.0 mg/kg will receive the 4.0% vamorolone suspension. Study medication will be shipped to the sites in 100 mL bottles labeled with subject-specific identifiers. Trained site study staff will calculate study medication dose volume based on subject body weight for all subjects as 0.15 mL/kg, regardless of treatment assignment.

Subjects, parents/guardians, site investigators and all other site study staff will not know to which treatment group the subject has been assigned and will remain blinded to the identity of the treatment assignment until the end of the study (last subject last visit) and the database has been locked.

2216

2217

### 3.4 Unblinding

2218

2219

Every attempt should be made to preserve the integrity of study drug blinding. All subjects will be provided with a card, to be carried at all times, stating “I am taking part in a clinical trial” (in the local language) to be presented to medical staff in the event of routine treatment or a medical emergency. Investigational medications can usually be withdrawn without the need for unblinding in a subject experiencing an AE that requires study medication withdrawal. In this case, the site investigator should provide adequate and necessary support to the subject without unblinding study treatment.

2220

2221

2222

2223

2224

2225

2226

2227

2228

Subjects who experience a medical emergency, whether their treatment remains blinded or is unblinded, should be covered with stress steroids, except for unblinded subjects who were receiving placebo.

2229

2230

All subjects who have study medication withdrawn without unblinding will need to undergo dose-tapering according to the schedule in [Section 6.4](#).

2231

2232

2233

In the event that unblinding is necessary, an emergency unblinding procedure is provided to allow site investigators to disclose a treatment assignment for an individual subject if clinical circumstances should require this.

2234

2235

2236

2237

2238

2239

2240

Unblinding will be performed and treatment assignment obtained through the IXRS system with username and password code. The expectation is that emergency unblinding will occur only very rarely; for example, when the subject needs emergency surgery and information about all treatment interventions is required. In the exceptional circumstance that knowledge of the study drug assignment appears essential for providing appropriate medical management, the site investigator should make every effort to contact the study chair or the independent Medical Monitor to discuss the rationale for breaking the blind.

2241

2242

2243

2244

If the site investigator still believes that unblinding is needed, or the study chair and independent Medical Monitor are not available for contact, the site investigator will follow the IXRS unblinding procedures for unblinding the subject in question (see the Manual of Operations for details on how to unblind a subject using the IXRS system).

2245

2246

After breaking the blind, the site staff should record details regarding the reasons for breaking the blind, including any AEs leading to the unblinding, in the source documents

2247

2248

and electronic case report form (eCRF). Once the blind is broken for a given subject, study drug will be discontinued and the subject will be withdrawn from the study.

2249

2250

Furthermore, as the subject might have received glucocorticoids (prednisone) as part of the study and as vamorolone appears to affect the adrenal axis, prednisone and vamorolone cannot be discontinued without a proper dose-tapering period.

2251

2252

2253

Any subject whose treatment is unblinded prior to the Week 24 Visit should return to the clinic for Week 24 assessments at the time of unblinding, whenever possible, assuming the subject has not withdrawn consent; any subject whose treatment is unblinded after Week 24 and prior to the Week 28 Visit should return to the clinic for Week 28

2254

2255

2256

2257

assessments at the time of unblinding, whenever possible, assuming the subject has not withdrawn consent; any subject whose treatment is unblinded after Week 28 and prior to the Week 48 Visit should return to the clinic for Week 48 assessments at the time of

2258

2259

2260

unblinding, whenever possible, assuming the subject has not withdrawn consent. Since

2261

2262

all subjects will receive vamorolone at one of two dose levels during Treatment Period #2 (Weeks 28 – 48), the identification, through unblinding, of the vamorolone dose level to which a given subject is assigned is unlikely to give additional useful information, and

2263

2264

thus the need to unblind treatment assignment is remote during this study period. Any

2265

2266

subject whose treatment, upon unblinding, is revealed to be either vamorolone or

2267

prednisone, will need to follow the dose-tapering protocol ([Section 6.4](#) specific to the

2268

time of unblinding); these subjects will also be asked to return to the clinic at the end of

2269

the tapering period for final Dose-tapering Period assessments, whenever possible. If the

2270

subject was taking placebo prior to unblinding, study drug tapering will not be required; however, the subject should return for final Week 24 assessments at the time of

2271

unblinding and withdrawal from the study. After unblinding, a subject may be prescribed

2272

standard of care glucocorticoids, if clinically indicated.

2273

Subjects who discontinue the study for any reason other than a medical emergency

2274

will not be unblinded.

2275

2276

2277

2278

2279

2280

2281

2282

2283

2284

2285

2286

2287

2288

2289

2290

2291

2292

2293

2294

2295

2296

2297

2298

2299

2300

2301

2302

2303

2304

2305

2306

2307

## 4 SELECTION AND WITHDRAWAL OF STUDY SUBJECTS

### 4.1 Subject Enrollment and Identification Log

Subjects will be recruited through the clinics of participating site investigators and other mechanisms including patient registries, national and international networks and patient foundations. After identification of a possible subject, the site investigator will discuss the study with the subject's parent(s) or legal guardian(s). The subject's parent(s) or guardian(s) will be provided with a copy of the study subject information sheet document and allowed time to consider participation prior to signing. Individuals interested in participating will be asked to come to one of the participating study sites to complete the informed consent process with a site investigator or designee prior to initiation of screening procedures. Subjects will not be excluded on the basis of race, ethnicity, or age, except that the target population for the trial is 4 to <7 years of age.

A subject enrollment log will be maintained at each investigational site for all subjects who are screened for the study, including those not randomized to treatment. Limited data will be collected for these subjects, including date of birth, and reason for exclusion from the study. Subject enrollment logs will be maintained for all subjects enrolled in the study. This record will also include the dates of subject enrollment and completion/termination.

The Site Investigator will keep a record relating the names of the subjects to their enrollment numbers (subject identification log) to permit efficient verification of data subject files, when required. These logs will be reviewed during routine monitoring calls and/or visits.

### 4.2 Inclusion Criteria

To qualify for randomization in this study, the subject must satisfy the following inclusion criteria:

1. Subject's parent(s) or legal guardian(s) has (have) provided written informed consent and Health Insurance Portability and Accountability Act (HIPAA) authorization, where applicable, prior to any study-related procedures;

2308  
2309  
2310  
2311  
2312  
2313  
2314  
2315  
2316  
2317  
2318  
2319  
2320  
2321  
2322  
2323  
2324  
2325  
2326  
2327  
2328  
2329  
2330  
2331  
2332  
2333  
2334  
2335  
2336

- participants will be asked to give written or verbal assent according to local requirements;
2. Subject has a centrally confirmed (by TRiNDS central genetic counselor[s]) diagnosis of DMD, as defined as:
    - Dystrophin immunofluorescence and/or immunoblot showing complete dystrophin deficiency, and clinical picture consistent with typical DMD, OR
    - Identifiable mutation within the DMD gene (deletion/duplication of one or more exons), where reading frame can be predicted as 'out-of-frame,' and clinical picture consistent with typical DMD, OR
    - Complete dystrophin gene sequencing showing an alteration (point mutation, duplication, other) that is expected to preclude production of the dystrophin protein (i.e., nonsense mutation, deletion/duplication leading to a downstream stop codon), with a clinical picture consistent with typical DMD;
  3. Subject is  $\geq 4$  years and  $<7$  years of age at time of enrollment in the study;
  4. Subject weighs  $>13.0$  kg and  $\leq 39.9$  kg at the Screening Visit;
  5. Subject is able to walk independently without assistive devices;
  6. Subject is able to complete the Time to Stand Test (TTSTAND) without assistance in  $<10$  seconds, as assessed at the Screening Visit;
  7. Clinical laboratory test results are within the normal range at the Screening Visit, or if abnormal, are not clinically significant, in the opinion of the Investigator. [Notes: Serum gamma glutamyl transferase (GGT), creatinine, and total bilirubin all must be  $\leq$  upper limit of the normal range at the Screening Visit. An abnormal vitamin D level that is considered clinically significant will not exclude a subject from randomization];
  8. Subject has evidence of chicken pox immunity as determined by:
    - Presence of IgG antibodies to varicella, as documented by a positive test result from the local laboratory from blood collected during the Screening Period, OR



2337

2338

- Documentation, provided at the Screening Visit, that the subject has had 2 doses of varicella vaccine, with or without serologic evidence of immunity; the second of the 2 immunizations must have been given at least 14 days prior to randomization.

2339

2340

2341

2342

9. Subject is able to swallow tablets, as confirmed by successful test swallowing of placebo tablets during the Screening Period; and

2343

2344

10. Subject and parent(s)/guardian(s) are willing and able to comply with scheduled visits, study drug administration plan, and study procedures.

2345

2346

### 4.3 Exclusion Criteria

2347

2348

A subject will be excluded from randomization in this study if he meets any of the following exclusion criteria:

2349

2350

1. Subject has current or history of major renal or hepatic impairment, diabetes mellitus or immunosuppression;

2351

2352

2. Subject has current or history of chronic systemic fungal or viral infections;

2353

2354

3. Subject has had an acute illness within 4 weeks prior to the first dose of study medication;

2355

2356

4. Subject has used mineralocorticoid receptor agents, such as spironolactone, eplerenone, canrenone (canrenoate potassium), prorenone (prorenoate potassium), mexrenone (mexrenoate potassium) within 4 weeks prior to the first dose of study medication;

2357

2358

2359

5. Subject has a history of primary hyperaldosteronism;

2360

2361

6. Subject has evidence of symptomatic cardiomyopathy [Note: Asymptomatic cardiac abnormality on investigation would not be exclusionary];

2362

2363

7. Subject is currently being treated or has received previous treatment with oral glucocorticoids or other immunosuppressive agents [Notes: Past transient use of oral glucocorticoids or other oral immunosuppressive agents for no longer than 1 month cumulative, with last use at least 3 months prior to first dose of study medication, will be considered for eligibility on a case-by-case basis, unless

2364

2365

2366

2367  
2368  
2369  
2370  
2371  
2372  
2373  
2374  
2375  
2376  
2377  
2378  
2379  
2380  
2381  
2382  
2383  
2384  
2385  
2386  
2387  
2388  
2389  
2390  
2391  
2392  
2393  
2394  
2395  
2396

- discontinued for intolerance. Inhaled and/or topical glucocorticoids are permitted if last use is at least 4 weeks prior to first dose of study medication or if administered at stable dose beginning at least 4 weeks prior to first dose of study medication and anticipated to be used at the stable dose regimen for the duration of the study];
8. Subject has an allergy or hypersensitivity to the study medication or to any of its constituents;
  9. Subject has used idebenone within 4 weeks prior to the first dose of study medication;
  10. Subject has severe behavioral or cognitive problems that preclude participation in the study, in the opinion of the Investigator;
  11. Subject has previous or ongoing medical condition, medical history, physical findings or laboratory abnormalities that could affect safety, make it unlikely that treatment and follow-up will be correctly completed or impair the assessment of study results, in the opinion of the Investigator;
  12. Subject is taking (or has taken within 4 weeks prior to the first dose of study medication) herbal remedies and supplements which can impact muscle strength and function (e.g., Co-enzyme Q10, Creatine, etc);
  13. Subject is taking (or has taken within 3 months prior to the first dose of study medication) any medication indicated for DMD, including Exondys51 and Translarna;
  14. Subject has been administered a live attenuated vaccine within 14 days prior to the first dose of study medication;
  15. Subject is currently taking any other investigational drug or has taken any other investigational drug within 3 months prior to the first dose of study medication;
  16. Subject has a sibling who is currently enrolled in any vamorolone study or Expanded Access Program, or who intends to enroll in any vamorolone study or Expanded Access Program during the subject's participation in the VBP15-004 study; or

2397

2398

17. Subject has previously been enrolled in the study.

2399

Note: Any parameter/test may be repeated at the Investigator's discretion during

2400

Screening to determine reproducibility. In addition, subjects may be rescreened if

2401

ineligible due to a transient condition which would prevent the subject from participating,

2402

such as an upper respiratory tract infection or injury, or if ineligible due to negative

2403

anti-varicella IgG antibody test result.

2404

2405

#### 4.4 Withdrawal of Subjects from Study

2406

2407

A subject may withdraw from the study, or may be withdrawn by his parent or guardian

2408

at any time without the need to justify the decision.

2409

The Investigator has the right to terminate participation of a subject in the study for any

2410

of the following reasons:

2411

- The subject's parent/legal guardian is uncooperative/noncompliant and does not adhere to study responsibilities, including failure to attend study visits;

2412

2413

- Difficulty in obtaining blood samples from the subject for safety monitoring;

2414

2415

- The subject experiences an unmanageable or non-tolerable AE/SAE which is considered to be possibly, probably, or definitely related to study drug, in the opinion of the Investigator, and may jeopardize the subject's health;

2416

2417

2418

- The Sponsor terminates the study;

2419

2420

- Any other reason relating to subject safety or integrity of the study data;

2421

2422

- The subject is unblinded to study treatment.

2423

2424

In the event a subject is withdrawn from the study, the Sponsor or designee (e.g.,

2425

Coordinating Center) will be informed within one business day. If there is a medical

2426

reason for withdrawal, the subject will remain under the supervision of the Investigator

2427

until resolution of the event.

2428

All subjects who withdraw from the study prior to the Week 24 Visit should return to

2429

the study site for Week 24 assessments and the Week 24 Follow-up Visit ACTH

2430

Stimulation Test at the time of early withdrawal and undergo Dose-tapering, where

2431  
2432 possible (see [Section 6.4.1](#) and [Section 7.2.7](#)), subjects who prematurely discontinue  
2433 from the study after Week 24 but prior to Week 28 should complete the Week 28  
2434 assessments at the time of early withdrawal and undergo Dose-tapering, where  
2435 possible (see [Section 6.4.2](#)), and subjects who prematurely discontinue from the study  
2436 after Week 28 but prior to Week 48 should complete the Week 48 assessments and  
2437 the Week 48 Follow-up Visit ACTH Stimulation Test at the time of early withdrawal  
2438 and undergo Dose-tapering, where possible (see [Section 6.3.7](#) and [Section 7.2.7](#)),  
2439 assuming the subject has not withdrawn consent. Subjects will also be asked to come  
2440 back at the end of the tapering period for a follow up visit. In the event a subject  
2441 withdraws informed consent, no further study procedures should be performed and no  
2442 additional data should be collected. Any data collected up to the point of withdrawal  
2443 of informed consent may be used by the Sponsor.

#### 2444 **4.5 Termination of Study**

2445  
2446 This study may be prematurely terminated if, in the opinion of the Sponsor, there is  
2447 sufficient reasonable cause. An example of a circumstance that may warrant termination  
2448 is determination of unexpected, significant, or unacceptable risks to participants.

2449 If the study is prematurely terminated or suspended, the Sponsor will promptly inform the  
2450 site Investigators and the regulatory authority(ies) of the termination or suspension and  
2451 the reason(s) for the termination or suspension. The Institutional Review Board(s)  
2452 (IRB[s])/Independent Ethics Committee(s) (IEC[s]) will also be informed promptly by  
2453 the Investigator/institution or the Sponsor and provided the reason(s) for the termination  
2454 or suspension.

2455 Subject enrollment at a given site may be terminated by the Sponsor. Possible reasons  
2456 for termination of the study at a given site include, but are not limited to:

- 2457 1. Unsatisfactory enrollment with respect to quantity or quality
- 2458
- 2459 2. Inaccurate or incomplete data collection
- 2460
- 2461 3. Falsification of records
- 2462
- 2463 4. Failure to adhere to the protocol.

2464

2465

Subjects who are participating at a given site at the time it is terminated by the Sponsor will be offered the opportunity to continue to participate in the study at an alternative active site. Subjects who decline the offer to participate at an alternative active site will need to undergo dose tapering at the time the original site is terminated according to the dose-tapering schedule (see [Section 6.4](#)).

2466

2467

2468

2469

2470

## 5 TREATMENT OF STUDY SUBJECTS

2471

2472

### 5.1 Study Medications Administered

2473

2474

#### 5.1.1 Study Medications Administered During Treatment Period #1

2475

2476

Vamorolone 1.33% wt/wt or 4.0% wt/wt oral suspension (investigational medicine), prednisone (active control) or placebo will be administered once daily over the 24-week Treatment Period #1.

2477

2478

2479

There are six treatment groups in this study. The oral suspensions and tablets for Treatment Period #1 are shown in [Table 7](#) for subjects who will be randomly assigned (2:2:1:1:1:1) to the following six treatment groups.

2480

2481

2482

**Table 7. Study Medications for the Six Treatment Groups During Treatment Period #1**

~~2483~~  
2484

| Treatment Group   | Study Medications    |                       |
|-------------------|----------------------|-----------------------|
|                   | Oral Suspension      | Tablets               |
| Treatment Group 1 | 2.0 mg/kg vamorolone | placebo               |
| Treatment Group 2 | 6.0 mg/kg vamorolone | placebo               |
| Treatment Group 3 | placebo              | 0.75 mg/kg prednisone |
| Treatment Group 4 | placebo              | 0.75 mg/kg prednisone |
| Treatment Group 5 | placebo              | placebo               |
| Treatment Group 6 | placebo              | placebo               |

2485

2486

2487

Vamorolone will be administered as a 1.33% wt/wt suspension for oral dosing at the planned dose level of 2.0 mg/kg and as a 4.0% wt/wt suspension for oral dosing at the planned dose level of 6.0 mg/kg. Prednisone will be administered as tablets for oral dosing at a dose of 0.75 mg/kg. Prednisone tablets will be dispensed at a dosage strength

2488

2489

2490

2491  
 2492 of 5 mg/tablet. To maintain the blind, matched suspension (vamorolone or placebo) and  
 2493 tablets (prednisone or placebo) have been produced. Each subject will receive a dose of  
 2494 suspension (0.15 mL/kg of vamorolone [1.33% oral suspension for the 2.0 mg/kg dose  
 2495 level or 4.0% oral suspension for the 6.0 mg/kg dose level] or placebo) and tablets  
 2496 (prednisone or placebo) each day (see [Section 3.3](#)). The number of tablets per dose will  
 2497 be determined by body weight (see [Table 10](#)).

2498 The clinical trials supplies companies will manufacture identical liquid formulation of  
 2499 vamorolone and placebo and identical tablets for prednisone and placebo to maintain the  
 2500 blind. Liquid solution of prednisone could not have been matched for color and flavor  
 2501 with vamorolone to maintain the blind. Therefore, a double-dummy design is being used  
 2502 in this study.

2503 **5.1.2 Study Medications Administered During Transition Period**

2504 Vamorolone 1.33% wt/wt or 4.0% wt/wt oral suspension (investigational medicine),  
 2505 prednisone (active control) or placebo will be administered once daily over the 4-week  
 2506 Transition Period. Prednisone and placebo tablets will be tapered over the 4-week  
 2507 Transition Period (see [Table 12](#)).  
 2508

2509 The oral suspensions and tablets for the Transition Period are shown in [Table 8](#) for  
 2510 subjects in each of the six treatment groups.

2511 **Table 8. Study Medications for the Six Treatment Groups During the Transition**  
 2512 **Period**

| Treatment Group   | Study Medications    |                          |
|-------------------|----------------------|--------------------------|
|                   | Oral Suspension      | Tablets (Tapering Doses) |
| Treatment Group 1 | 2.0 mg/kg vamorolone | placebo                  |
| Treatment Group 2 | 6.0 mg/kg vamorolone | placebo                  |
| Treatment Group 3 | placebo              | prednisone               |
| Treatment Group 4 | placebo              | prednisone               |
| Treatment Group 5 | placebo              | placebo                  |
| Treatment Group 6 | placebo              | placebo                  |

2514

2515

2516

2517

2518

2519

2520

2521

2522

2523

2524

2525

2526

2527

Vamorolone will continue to be administered as a 1.33% wt/wt suspension for oral dosing at the planned dose level of 2.0 mg/kg and as a 4.0% wt/wt suspension for oral dosing at the planned dose level of 6.0 mg/kg. Prednisone will be administered as tablets for oral dosing with decreasing number of tablets over the 4-week Transition Period (**Table 12**). Prednisone tablets will be dispensed at a dosage strength of 5 mg/tablet. To maintain the blind, each subject will receive a dose of suspension (0.15 mL/kg of vamorolone [1.33% oral suspension for the 2.0 mg/kg dose level or 4.0% oral suspension for the 6.0 mg/kg dose level] or placebo) and tablets (prednisone or placebo) each day (see **Section 3.3**). The number of tablets per dose will be tapered to zero (0) over the 4-week Transition Period (see **Table 12**).

**5.1.3 Study Medications Administered During Treatment Period #2 and the Dose-tapering Period**

2528

2529

2530

2531

Vamorolone 1.33% wt/wt or 4.0% wt/wt oral suspension (investigational medicine) will be administered once daily over the 20-week Treatment Period #2, and during the 4-week Dose-tapering Period, as applicable. No study drug tablets are administered during Treatment Period #2 or the Dose-tapering Period.

2532

2533

The oral suspensions for Treatment Period #2 are shown in **Table 9** for subjects in each of the six treatment groups.

2534

2535

2536

**Table 9. Study Medications for the Six Treatment Groups During Treatment Period #2 and the Dose-tapering Period**

| Treatment Group   | Study Medications    |
|-------------------|----------------------|
|                   | Oral Suspension      |
| Treatment Group 1 | 2.0 mg/kg vamorolone |
| Treatment Group 2 | 6.0 mg/kg vamorolone |
| Treatment Group 3 | 2.0 mg/kg vamorolone |
| Treatment Group 4 | 6.0 mg/kg vamorolone |
| Treatment Group 5 | 2.0 mg/kg vamorolone |
| Treatment Group 6 | 6.0 mg/kg vamorolone |

2537

2538

Vamorolone will be administered as a 1.33% wt/wt suspension for oral dosing at the planned dose level of 2.0 mg/kg and as a 4.0% wt/wt suspension for oral dosing at the planned dose level of 6.0 mg/kg. During Treatment Period #2, each subject will receive a dose of suspension (0.15 mL/kg of vamorolone [1.33% oral suspension for the 2.0 mg/kg dose level or 4.0% oral suspension for the 6.0 mg/kg dose level] each day (see

2543

[Section 3.3](#)). The dose of suspension study medication will be tapered according to the

2544

schedule outlined in [Section 6.3.7](#) during the Dose-tapering Period.

2545

## 5.2 Identity of Investigational Product

2546

ReveraGen BioPharma, Inc. will supply the following investigational study medications:

2547

2548

### Vamorolone

2549

Active Substance: Vamorolone

2550

Strength: 1.33% wt/wt and 4.0% wt/wt

2551

Dosage Form: Oral suspension

2552

Manufacturer: Velesco Pharmaceutical Services

2553

### Prednisone

2554

Active Substance: Prednisone

2555

Strength: 5 mg

2556

Dosage Form: Tablet

2557

Manufacturer: Piramal Healthcare UK Limited

2558

### Placebo to Match Vamorolone

2559

Dosage Form: Oral suspension

2560

Manufacturer: Velesco Pharmaceutical Services

2561

### Placebo to Match Prednisone

2562

Dosage Form: Tablet

2563

Manufacturer: Piramal Healthcare UK Limited



2564

2565

### 5.3 Dosage Schedule and Administration of Study Medication

2566

2567

The site pharmacist or designated site study staff will dispense blinded study medication to each subject randomized in the study (see [Section 5.8](#)). Subjects will receive one of six study medication combinations depending on their treatment group assignment ([Table 7](#)).

2568

2569

2570

2571

To maintain the study blind, matched suspension (vamorolone or placebo) and tablets (prednisone or placebo) have been produced (see [Section 3.3](#)). Vamorolone will be administered as a suspension for oral dosing (1.33% wt/wt suspension for the 2.0 mg/kg dose level or as a 4.0% wt/wt suspension for the 6.0 mg/kg dose level) (see Pharmacy Manual for instructions on calculation of suspension dose volume). Prednisone will be administered as 5 mg tablets for oral dosing.

2572

2573

2574

2575

2576

2577

Each subject will receive a dose of suspension (vamorolone or placebo) and tablets (prednisone or placebo) each day during Treatment Period #1, and a dose of suspension (vamorolone or placebo) each day during Treatment Period #2. The number of prednisone or matching placebo tablets per dose will depend upon body weight, as indicated below ([Table 10](#)). All subjects will receive 0.15 mL/kg per dose of a vamorolone or placebo suspension ([Table 7](#)).

2578

2579

2580

2581

2582

2583

**Table 10 Weight Bands for Prednisone or Matching Tablet Dosing**

| Band | Weight range in kg | Weight used for calculation of dose per kg | Prednisone dose in mg based on 0.75 mg/kg | Number tablets of prednisone (5 mg) or matching placebo per dose for given weight range |
|------|--------------------|--------------------------------------------|-------------------------------------------|-----------------------------------------------------------------------------------------|
| A    | 13-19.9            | 13.33 kg                                   | 10 mg                                     | 2                                                                                       |
| B    | 20-25.9            | 20.00 kg                                   | 15 mg                                     | 3                                                                                       |
| C    | 26-32.9            | 26.67 kg                                   | 20 mg                                     | 4                                                                                       |
| D    | 33-39.9            | 33.33 kg                                   | 25 mg                                     | 5                                                                                       |

2585

2586

2587

Subjects will receive study medication, administered orally once daily for 48 weeks, from Study Day 1 to the Week 48 Visit. At the end of the 24-week Treatment Period #1, all

2588

2589  
2590  
2591  
2592  
2593  
2594  
2595  
  
2596  
2597  
2598  
2599  
2600  
2601  
2602  
2603  
2604  
2605  
2606  
2607  
2608  
2609  
2610  
2611  
2612  
2613  
2614  
2615  
2616  
2617  
2618  
2619

subjects will be tapered off the tablet study medication over a 4-week Transition Period. Those subjects randomized to receive placebo will also undergo tablet dose-tapering to maintain the study blind. At the end of the 20-week Treatment Period #2, subjects who will transition off vamorolone treatment at the end of the study will be tapered off suspension study medication over a 4-week Dose-tapering Period, prior to discharge from the study (see [Section 6.3.7](#)).

Study medication sufficient for 4, 6, or 8 weeks of dosing (plus overage), depending upon the dispensing interval, will be dispensed by trained study staff at the Day 1 Visit, just prior to dosing, and at Week 6, Week 12, Week 18, Week 24 Follow-up, Week 28, Week 34, Week 40, and Week 48 Follow-up. Each subject's dose (in mL for suspension formulation; in number of tablets for tablet formulation) will be calculated and written on the labels of the bottles and blisters to be dispensed at a given visit by trained site staff based on the weight of the subject (in kg) recorded at the previous visit: weight at Screening will be used to calculate dose of suspension and tablets for drug supply dispensed at Day 1; weight at the Week 2 Visit will be used to calculate dose of suspension and tablets for drug supply dispensed at Week 6; weight at the Week 6 Visit will be used to calculate dose of suspension and tablets for drug supply dispensed at Week 12; weight at the Week 12 Visit will be used to calculate dose of suspension and tablets for drug supply dispensed at Week 18; weight at the Week 18 Visit will be used to calculate dose of suspension and tablets for drug supply dispensed at Week 24 Follow-up for the Transition Period; weight at the Week 24 Visit will be used to calculate dose of suspension for drug supply dispensed at Week 28; weight at the Week 30 Visit will be used to calculate dose of suspension for drug supply dispensed at Week 34; weight at the Week 34 Visit will be used to calculate dose of suspension for drug supply dispensed at Week 40; and weight at the Week 40 Visit will be used to calculate dose of suspension and tablets for drug supply dispensed at the Week 48 Follow-up Visit for the Dose-tapering Period. The dispensed study medication bottle(s) and blister(s) will be returned to the study site at each subsequent scheduled study visit. Study medication suspension and tablets dispensed at the Day 1 Visit should be brought in with the subject to the Week 2 Visit, for Week 2 dosing in-clinic and compliance monitoring; this study

2620

2621 medication will be returned to the subject at the end of the Week 2 Visit for continued  
2622 dosing through the Week 6 Visit: new study medication will not be dispensed at the  
2623 Week 2 Visit. In a similar manner, study medication dispensed at the Week 28 Visit  
2624 should be brought in with the subject to the Week 30 Visit, for Week 30 dosing in-clinic  
2625 and compliance monitoring; this study medication will be returned to the subject at the  
2626 end of the Week 30 Visit for continued dosing through the Week 34 Visit: new study  
2627 medication will not be dispensed at the Week 30 Visit.

2628 Randomized subjects will receive all doses under the supervision of parents or legal  
2629 guardians or trained study staff. Study drugs will be administered in the study unit at the  
2630 Day 1, Week 2, Week 12, Week 24, Week 28, Week 30, Week 40, and Week 48 study  
2631 visits; all other doses will be administered at home. Subjects should receive each dose of  
2632 study medication in the morning and at approximately the same time of day.

2633 Vamorolone or matching placebo suspension will be administered orally using a  
2634 volumetric syringe supplied by the site. Following administration of the dose of study  
2635 drug suspension, the syringe will be filled once with water and the water will be  
2636 administered by mouth using the volumetric syringe. Prednisone or matching placebo  
2637 tablets will be taken either immediately before or immediately after the dose of  
2638 suspension. The subject will then drink approximately 50 mL (approximately 2 ounces)  
2639 of water to ensure the full dose has been ingested. The dose of study medication should  
2640 be taken with breakfast, including at least 8 g of fat (approximately 8 ounces [240 mL] of  
2641 full-fat milk or equivalent high-fat food portion). There are no other food or drink  
2642 restrictions before or after dosing.

2643 At the Day 1, Week 2, Week 12, Week 24, Week 28, Week 30, Week 40, and Week 48  
2644 study visits, subjects will arrive at the study clinic after having fasted for  $\geq 6$  hours, and  
2645 will eat breakfast at the study site within 30 minutes prior to administration of the dose of  
2646 study medication; breakfast at the site will include at least 8 g of fat (8 ounces [240 mL]  
2647 of full-fat milk or equivalent high-fat food portion).

2648 Any missed or incomplete doses of study medication should be recorded in the Subject  
2649 Diary and reported immediately to the site Investigator.

2650

2651 **5.4 Rationale for Dose Selection**

2652

2653

Dose levels of the investigational medication were chosen for this study to ensure the safety of subjects participating in the study, and to allow demonstration of efficacy and PD effects. The prednisone (active control) dose was selected based on current standard of care practice in boys with DMD.

2656

2657

All doses of study medication will be administered in the morning with breakfast, including at least 8 g of fat (approximately 8 ounces [240 mL] of full-fat milk or equivalent high-fat food portion).

2658

2659

2660

Based on the comparison between the PK parameters in DMD boys receiving 0.25 mg/kg or 0.75 mg/kg vamorolone with a glass of full-fat milk or equivalent fat-containing food and the PK parameters in healthy adult males receiving similar doses of vamorolone fasted, it appears that the 2.5-fold increase in exposure observed between the fasted and fed conditions in the healthy adult males ([Section 1.3.1](#)) is not reproduced in the DMD boys (see [Section 1.3.2](#)). The rationale for the lowest vamorolone dose of 2.0 mg/kg/day, administered with a glass of full-fat milk or equivalent fat-containing food is as follows: A starting dose of 2.0 mg/kg/day with a glass of milk is approximately 10% of the highest safe dose tested in adults (20.0 mg/kg/day fasted).

2661

2662

2663

2664

2665

2666

2667

2668

2669

The highest vamorolone dose to be administered, 6.0 mg/kg/day, will similarly be administered with a glass of full-fat milk or equivalent fat-containing food. As 20.0 mg/kg/day fasted in adult volunteers was shown to be safe in the Phase I adult volunteer study, the proposed highest dose in 4 to 7 year-old children is approximately 30% of the highest safe adult dose. Based on the Phase I PD biomarker safety data presented in [Section 1.3](#), safety signals reflective of insulin resistance are not anticipated at either of the planned dose levels. Also based on the Phase I data, vamorolone showed little evidence of either acute (24-hour data) or chronic (Day 15 data) suppression of the adrenal axis at doses of either 1.0 mg/kg/day or 3.0 mg/kg/day. The data suggest that vamorolone induces variable, mild, acute and chronic suppression of the adrenal axis at 9.0 mg/kg/day, and stronger evidence of both acute and chronic adrenal axis suppression at 20.0 mg/kg/day.

2670

2671

2672

2673

2674

2675

2676

2677

2678

2679

2680

2681  
2682 Vamorolone at doses of 0.25 mg/kg/day, 0.75 mg/kg/day, 2.0 mg/kg/day and  
2683 6.0 mg/kg/day has been demonstrated to be safe and well-tolerated in a 2-week Phase IIa  
2684 study (VBP15-002) in 4 to <7 years DMD boys. There has been a total of 11 SAEs in the  
2685 vamorolone program to date: a total of 4 SAEs in the VBP15-003 study, a total of 3 SAEs  
2686 in the VBP15-LTE study, a total of 3 SAEs in the VBP15-004 study, and 1 SAE in the  
2687 VBP15-EAP program. There have been two SAEs of pneumonia in two different  
2688 subjects (both subjects receiving vamorolone 0.75 mg/kg/day); one SAE of bilateral  
2689 testicular torsion and one SAE of hypoxia in the same subject receiving 6.0 mg/kg/day;  
2690 one SAE of influenza associated dehydration in a subject receiving 6.0 mg/kg/day; two  
2691 SAEs of acute myoglobinemia in the same subject receiving 6.0 mg/kg/day; one SAE  
2692 of viral gastroenteritis with secondary dehydration in a subject receiving blinded study  
2693 drug; one SAE of asthma exacerbation in the setting of respiratory syncytial virus and  
2694 bronchiolitis in a subject receiving vamorolone at either 2.0 mg/kg/day or 6.0 mg/kg/day;  
2695 one SAE of perforated appendicitis occurring with 30 days after the subject completed  
2696 the VBP15-004 study, and one SAE of viral gastroenteritis requiring hospitalization for  
2697 hydration. Each of these SAEs was considered unrelated to study drug, and none of them  
2698 resulted in discontinuation from the study. One subject receiving vamorolone 6.0 mg/kg  
2699 in the Phase II extension study (VBP15-003) who had an incidental early morning  
2700 cortisol drawn following an AE of presyncope had evidence of adrenal suppression. In  
2701 the VBP15-003 study, after 24 weeks of treatment, 0 of 8 tested participants  
2702 (0.25 mg/kg/day), 1 of 12 (8.3%) tested participants (0.75 mg/kg/day), 5 of 12 (41.7%)  
2703 tested participants (2.0 mg/kg/day), and 8 of 9 (88.9%) tested participants  
2704 (6.0 mg/kg/day) had a depressed morning cortisol (<3.6 µg/dL [100 nM]) consistent with  
2705 chronic adrenal suppression.<sup>29</sup> Thus, based on the available data in the Phase I and Phase  
2706 II studies regarding the safety signal of suppression of the adrenal axis, the possibility of  
2707 adrenal suppression is present in subjects at the 2.0 and 6.0 mg/kg/day dose levels.

2708 The dose of prednisone has been selected according to the Care Recommendation for  
2709 DMD (daily prednisone 0.75 mg/kg/day). The weight-dose bands ([Table 10](#)) have been  
2710 selected to ensure that subjects will not be overdosed in view of the potential side effects.

2711

2712 **5.5 Treatment Compliance**

2713

2714

2715

2716

2717

2718

2719

2720

2721

2722

2723

2724

2725

2726

2727

2728

Subject compliance with the dosing schedule will be assessed by site maintenance of accurate study drug dispensing and return records, and accurate recording of incomplete or missed doses by completion of a diary by the subject's parent or guardian. The Investigator is responsible for ensuring that dosing is administered in compliance with the protocol. The Investigator or designee will instruct the subject's parent or guardian with regard to proper dosing of study medication and completion of subject diaries, and will reinforce the importance of taking all study medication per protocol instructions. Doses of study drug on the days of the Day 1, Week 2, Week 12, and Week 24 Visits (Treatment Period #1), Week 28 (Transition Period), and Week 30, Week 40, and Week 48 (Treatment Period #2) will be administered at the participating study site by a trained investigational staff member. All incomplete or missed doses are to be documented in the source document and on the appropriate eCRF page. The volume of unused study medication remaining in each bottle returned, as well as the number of unused tablets, will be documented in the source documents and on the appropriate eCRF page.

2729

2730

2731

2732

2733

2734

2735

2736

2737

2738

**5.6 Study Drug Dose Interruption or Discontinuation**

Subjects whose study medication is interrupted should continue to follow the original schedule and timing of study visits. Study staff should contact the Study Chair or Medical Monitor at the time of dose interruption for any additional instructions for visit-specific assessments. If the study medication is interrupted during the scheduled Week 24 F/U or Week 48 F/U Visit, the scheduled ACTH Stimulation Test should be performed, but the site should contact the Study Chair or Medical Monitor prior to the Week 24 or Week 48 Visit to discuss whether the dose of hydrocortisone scheduled for one day prior to the ACTH Stimulation Test should be given.

2739

2740

2741

2742

In the event any clinical observation suggests an intolerability of an individual subject to the study medication, in the opinion of the Investigator, the case should be discussed with the Study Chair and the Independent Medical Monitor within 24 hours and study drug discontinuation should be considered. In view of the potential effect of the study drugs

2743

2744

on adrenal glands, the study drugs cannot be discontinued suddenly. In case study drug needs to be discontinued, for whatever reason, the dose tapering process described for the end of the treatment period should be followed. If a subject discontinues study drug due to intolerability, the subject will be withdrawn from the study. Study drug discontinuation due to intolerability will not usually require unblinding (see [Section 3.4](#)).

2749

The subject should return to the study site for completion of Week 24 assessments and the Week 24 Follow-up Visit ACTH Stimulation Test at the time of early withdrawal (if withdrawal is prior to the Week 24 Visit), or Week 48 assessments and the Week 48 Follow-up Visit ACTH Stimulation Test (if withdrawal is after Week 24 and prior to the Week 48 Visit), prior to participation in the Dose-tapering Period. Any AE still ongoing at the time of study drug discontinuation will be monitored until it has returned to baseline status, stabilized, or the Investigator, Study Chair, Medical Monitor and Sponsor agree that follow-up is no longer needed.

2756

2757

## **5.7 Prior and Concomitant Medications and Therapies**

2758

2759

### **5.7.1 Prior Therapy**

2760

2761

All medications (prescription and over-the-counter [OTC]) taken within 3 months prior to the Screening Visit through Baseline Day -1 (until just prior to administration of the first dose of study medication) will be captured as prior medications (Medication History) in the source document and the eCRF, including the name of the medication (or device or procedure), the dosage and regimen, the indication, and the treatment start and stop dates. All past (lifetime) steroid use will be recorded.

2762

2763

2764

2765

2766

2767

### **5.7.2 Concomitant Therapies**

2768

2769

Any medications that are taken after administration of the first dose of study medication will be recorded as concomitant medications on the appropriate eCRF page. Subject diaries will be provided to subjects to record any concomitant medication changes during the study (see [Section 7.4.6](#)).

2770

2771

2772

2773

All medications (prescription and OTC) taken during the study must be recorded in the source documents and in the eCRF, including the name of the medication, dosage and regimen, reason for therapy, and treatment start and stop dates. Furthermore, each

2774

2775

2776

2777

change in concomitant medication (e.g., new treatment, discontinuation of treatment, or change in dosage/regimen) during the study must be documented in the same manner.

2778

2779

Details of any non-pharmacological therapies (e.g., devices, procedures), including name, reason for therapy (i.e., DMD or non-DMD), and dates of therapy will also be recorded.

2780

2781

Site personnel will review the information with the subject and/or his parent or guardian, if applicable, for completeness and accuracy at each study visit.

2782

2783

### **5.7.3 Prohibited Therapies**

2784

2785

Subjects must discontinue use of the following medications prior to participation in the study, as indicated, and refrain from using these medications throughout the duration of the study:

2786

2787

2788

- Mineralocorticoid receptor agents, such as spironolactone, eplerenone, canrenone (canrenoate potassium), prorenone (prorenoate potassium), mexrenone (mexrenoate potassium): use must be discontinued at least 4 weeks prior to the first dose of study medication;

2789

2790

2791

2792

- Oral glucocorticoids or other immunosuppressive agents. Subjects who have received prior treatment with immunosuppressive agents are ineligible for study entry. [Notes: Inhaled and/or topical glucocorticoids are permitted but must be administered at stable dose beginning at least 4 weeks prior to first dose of study medication, and are anticipated to be used at the stable dose regimen for the duration of the study; past transient use of oral or inhaled glucocorticoids or other oral immunosuppressive agents for no longer than 1 month cumulative, with last use at least 3 months (or last use at least one month prior for inhaled glucocorticoids) prior to first dose of study medication, will be considered for eligibility on a case-by-case basis.]

2793

2794

2795

2796

2797

2798

2799

2800

2801

2802

- Idebenone: use must be discontinued at least 4 weeks prior to the first dose of study medication

2803

2804

- Live attenuated vaccines: use must be avoided within 14 days prior to first dose of study medication and for the duration of participation in the study

2805



2806

2807

- Any investigational medications other than vamorolone: use must be discontinued at least 3 months prior to the first dose of study medication

2808

2809

- Other medications indicated for the treatment of DMD, including Exondys 51 and Translarna: use must be discontinued at least 3 months prior to the first dose of study medication.

2810

2811

2812

- Any approved medications or herbal remedies which can impact strength and function (including, but not limited to, Co-enzyme Q10, creatine): use must be discontinued at least 4 weeks prior to the first dose of study medication.

2813

2814

2815

In addition, vamorolone should be used with caution with any drug metabolized by cytochrome P450 3A4 (CYP3A4).

2816

2817

The Investigator should contact the Study Chair and Medical Monitor concerning individual medications or therapies not listed that may be of concern.

2818

2819

#### ***5.7.4 Permitted Therapies***

2820

2821

Every effort should be made NOT to start any prescription or OTC medications during the study. Concomitant medications should be maintained on the same dose and regimen throughout the study whenever possible. However, all other medications other than those specifically prohibited above may be taken during the study, if clinically indicated, provided they are recorded in the source documents and in the eCRF.

2822

2823

2824

2825

2826

#### ***5.7.5 Hydrocortisone***

2827

2828

All subjects will be given a single dose of hydrocortisone (5 mg or 10 mg) 24 hours after the final dose of Treatment Period #1 study medication at the Week 24 Visit, and 24 hours after the final dose of Treatment Period #2 study medication at the Week 48 Visit. The hydrocortisone dose will be approximately 8 mg/m<sup>2</sup>, rounded up to either 5 mg or 10 mg; subjects will be provided with either a single 5 mg or 10 mg hydrocortisone tablet which will be dispensed by the site staff at the Week 24 and Week 48 Visits.

2829

2830

2831

2832

2833

2834

In addition, all subjects should be covered with “stress dosing” of hydrocortisone (or prednisone) during times of illness, injury, or surgery (see [Section 7.2.7](#)).

2835

2836

2837 **5.7.6 Vitamin D**

2838

2839

2840

2841

2842

2843

Serum Vitamin D levels will be measured at Screening and at the Weeks 12, 24, 40, and 48 Visits. Vitamin D insufficiency and deficiency (serum 25[OH] D concentration less than 20 ng/mL or less than 50 nmol/L) will be treated with high doses of Vitamin D supplement according to local site guidelines. Vitamin D supplements will be recorded in the source document and in the eCRF.

2844

2845

**5.8 Study Medication Management**

2846

2847

2848

**5.8.1 Packaging and Labeling of Study Medication**

2849

2850

2851

2852

2853

When all entry criteria are met, and at least 10 days prior to the Baseline Day -1 Visit, subjects will be randomized to treatment via the IXRS system. Subject-specific suspension and tablet study drug supplies sufficient for the first six weeks of Treatment Period #1 will be packaged, labeled (with MED ID number and other protocol-specific information) and couriered to the pharmacy at the recruiting site prior to the Baseline Visit for the subject.

2854

2855

2856

2857

Investigational medication suspension and matching placebo suspension will be packaged in sterile 120 mL (4 oz) amber bottles with a 100 mL fill volume with child-resistant cap with a 24 mm bottle press-in adapter. Bottles are filled with 110 mL of suspension in order to guarantee a delivery of 100 mL.

2858

2859

2860

2861

2862

2863

2864

2865

2866

Bottles of investigational medication suspension will contain either 1.33 grams of vamorolone/100 mL (1.33% orange-flavored suspension) or 4.0 grams of vamorolone/100 mL (4.0% orange-flavored suspension). The matching placebo suspension will be identical in appearance and taste to the vamorolone suspensions. The volume per dose to be administered to each subject depends on the subject's weight (in kg) recorded at the visit prior to each study drug dispensing visit. Each subject will receive a volume of 0.15 mL/kg of a vamorolone suspension or matching placebo suspension ([Table 7](#)). Instructions for the calculation of each dose of liquid formulation are given in the Pharmacy Manual.

2867

2868 Prednisone 5 mg tablets and matching placebo will be dispensed in blister packs, each  
2869 containing 15 tablets. The number of tablets to be administered per dose to each subject  
2870 depends on the subject body weight calculated at the visit prior to each study drug  
2871 dispensing visit ([Table 10](#)).

2872 Drug supplies will be labeled with the Sponsor name, protocol number, lot number,  
2873 expiration or retest date, and other appropriate study information. Carton, bottle, and  
2874 blister pack labels will be written in accordance with all applicable laws, guidance and  
2875 directives of the jurisdiction where the study is being conducted.

2876 Trained site staff will write the dose in mL (suspension) and number of tablets (tablets)  
2877 on the bottle and blister pack labels, respectively, prior to bottle and blister pack  
2878 dispensing to subjects.

2879 At the Screening Visit, a test packet containing placebo tablets will be provided by the  
2880 site investigator to confirm the subject's ability to swallow tablets. The test of  
2881 swallowing ability will take place at the Screening Visit. At the beginning of the trial, the  
2882 clinical trials supply company will provide each site with sufficient test packets for their  
2883 anticipated recruitment numbers. These test packets will be stored in a locked cupboard,  
2884 at ambient room temperature.

2885 Study medication will be dispensed to the subject's parent or legal guardian for  
2886 Treatment Period #1 dosing at the Day 1 Visit and at the Week 6, Week 12 and Week 18  
2887 Visits. At the Week 24 Follow-up Visit, a 4-week supply of study medication for the  
2888 Week 25 to Week 28 Transition Period will be dispensed. Study medication will be  
2889 dispensed to the subject's parent or legal guardian for Treatment Period #2 dosing at the  
2890 Week 28, Week 34, and Week 40 Visits. At the Week 48 Follow-up Visit, study  
2891 medication for the Dose-tapering Period will be dispensed. Dispensed bottles and unused  
2892 tablets of study medication will be returned at each subsequent study visit, prior to  
2893 dispensing bottle(s)/blister pack(s) for the next dispensing interval (see [Section 5.3](#)).  
2894 Each study medication bottle and blister pack may be used for a single subject only.

2895

2896 Clinical supplies dispensed by the study site staff and ready for administration to subjects  
2897 will be labeled with the dispense date, protocol number, MED ID number, and volume  
2898 (suspension) or number of tablets to be administered per dose.

2899 **5.8.2 Storage of Study Medication**

2900

2901 All Clinical Trial Materials (CTM) for use in the trial must be stored in a locked  
2902 container/cabinet free from environmental extremes, under the responsibility of the  
2903 institutional pharmacist or Principal Investigator. Study medication suspensions should  
2904 be stored at refrigerated temperature (2°C – 8°C; 36°F – 46°F). Excursions to ambient  
2905 temperature are allowed (see Pharmacy Manual for details). Study medication tablets  
2906 will be stored in a locked cupboard, at ambient room temperature.

2907 Access to study medication stored at the study site must be limited to authorized clinic  
2908 personnel.

2909 **5.8.3 Study Medication Shipping and Handling**

2910

2911 Clinical trial material will be shipped to the study sites only after receipt of required  
2912 documents in accordance with applicable regulatory requirements and Sponsor  
2913 procedures.

2914 When all entry criteria are met, at least 10 days prior to the Baseline Visit, subjects will  
2915 be randomized to treatment via the IXRS system. Subject-specific suspension and tablet  
2916 drug supplies will be packaged, labeled (with MED ID number and other  
2917 protocol-specific information) and couriered to the pharmacy at the study site prior to the  
2918 Baseline Visit for the subject. At the Day 1 Visit, the trained site staff will record the  
2919 volume in mL per suspension dose (bottles) and number of tablets per dose (blister packs)  
2920 on the bottle and blister pack labels, respectively. Labeled study drug supplies sufficient  
2921 to last until the Week 6 Visit will be dispensed to each subject. The first dose of study  
2922 medication will be administered in clinic on Study Day 1. The initial drug supply will be  
2923 sufficient to allow for the Week 6 Visit to occur on the latest date permissible within the  
2924 protocol-specified visit window (6 weeks ± 3 days). No additional study drug supplies  
2925 will be dispensed at the Week 2 Visit.

2926

2927 Prior to the subsequent study drug dispensing visits (i.e., Week 6, Week 12, Week 18,  
2928 Week 24 Follow-up, Week 28, Week 34, Week 40, Week 48 Follow-up), additional study  
2929 drug supplies will be ordered using the IXRS system. Study drug dispensed at the  
2930 Week 28, Week 34, Week 40, and Week 48 Follow-up Visits for dosing during  
2931 Treatment Period #2 and the Dose-tapering Period will consist of liquid suspension only  
2932 (no tablets). The new subject-specific drug supply will be packaged, labeled (as  
2933 described above) and couriered to the site. Study drug will be ordered at least 10 days  
2934 prior to the next scheduled study drug dispensing visit to allow time for the new supplies  
2935 to be shipped to the site in time for the next scheduled dispensing visit.

2936 It is essential to this study that all CTM be accounted for during the study period. All  
2937 unused (i.e., undispensed; dispensed and returned) study medication will be retained at  
2938 the study site for reconciliation by the Sponsor's study monitors (or designees) during  
2939 routine monitoring visits. Final disposition of all unused CTM will be coordinated by the  
2940 Sponsor's study monitors (or designees) throughout and at the end of the study (see  
2941 [Section 5.8.4](#)).

2942 Clinical trial material must be dispensed and administered according to the procedures  
2943 described in this protocol. Only subjects randomized in the study may receive study  
2944 medication, in accordance with all applicable regulatory requirements. Only authorized  
2945 study personnel may supply CTM. Authorized study personnel refers to the Investigator  
2946 (or designee) and hospital pharmacists, in accordance with all applicable regulatory  
2947 requirements and the Site Signature Log/Delegation of Authority. Only authorized study  
2948 personnel or the subject's parent or legal guardian may administer CTM.

#### 2949 **5.8.4 Study Medication Accountability**

2950

2951 The Investigator is responsible for the control of drugs under investigation. Adequate  
2952 records of the receipt (e.g., Drug Receipt Record) and disposition (e.g., Drug Dispensing  
2953 Log) of the study drug must be maintained. The Drug Dispensing Log must be kept  
2954 current and should contain the following information:

2955

- The Subject ID number of the subject to whom the study drug was dispensed

2956

- The MED ID number of the dispensed kit

2957

2958

2959

- The date(s) and quantity of the study drug dispensed to the subject

2960

2961

- The date(s) and quantity of the study drug returned by the subject.

2962

2963

2964

2965

2966

2967

2968

2969

2970

All records and drug supplies must be available for inspection by the Study Monitor at every monitoring visit. Unused medication will be returned to ReveraGen Inc. or its designee or destroyed on site at the end of the study or at a specific time in agreement with the Sponsor, as coordinated between the site and ReveraGen or its designee. The completed Drug Dispensing Log and Drug Return Record(s) will be returned to ReveraGen Inc or its designee. The Investigator's copy of the Drug Return Record(s) must accurately document the return of all study drug supplies to ReveraGen Inc. or its designee.

2971

## 5.9 Procedures for Assigning Subject Study Numbers

2972

2973

All data for all subjects whose parent(s) or guardian(s) sign the Informed Consent Form (ICF) for the study will be identified using the unique subject identification number.

2974

2975

Subjects are considered to be enrolled in the study when the parent(s) or guardian(s) signs the study-specific ICF at Screening. The Site Investigator will keep a record relating the names of the subjects to their ID numbers (subject identification log) to permit efficient verification of data subject files, when required. A subject enrollment log will include the dates of subject enrollment and completion/termination.

2976

2977

2978

2979

2980

## 6 STUDY SCHEDULE

2981

2982

### 6.1 Time and Events Schedule

2983

2984

The study procedures to be conducted for each subject are divided into the following study periods:

2985

2986

- **Pretreatment Screening Period:** The up to 32-day interval, from subject's parent or guardian signing of the Informed Consent/HIPAA authorization until completion of all designated screening procedures, 24 hours prior to the first dose of study medication. All screening procedures must be completed by Day -11. Subjects meeting all eligibility criteria will be randomized by Day -11, at least 10 days prior to the Baseline Day -1 Visit.

2987

2988

2989

2990

2991

2992  
2993  
2994  
2995  
2996  
2997  
2998  
2999  
3000  
3001  
3002  
3003  
3004  
3005  
3006  
3007  
3008  
3009  
3010  
3011  
3012  
3013  
3014  
3015  
3016  
3017  
3018  
3019  
3020  
3021

- **Pretreatment Baseline Period:** The 24-hour period immediately prior to administration of the first dose of study medication (Baseline Day -1).
- **Treatment Period #1:** The 24-week interval starting with administration of the first dose of study medication on Study Day 1 and continuing through the time of the Week 24 Follow-up Visit. Treatment Period #1 includes administration of the final dose of Treatment Period #1 study medication at the Week 24 Visit, and ACTH Stimulation testing at the Week 24 Follow-up Visit,  $48 \pm 3$  hours after the final dose of Treatment Period #1 study medication.
- **Transition Period:** The 4-week interval following the end of the 24-week Treatment Period #1 during which subjects will continue on their suspension study medication at the same dose they received during the Treatment Period #1 and have their tablet study medication dose tapered to zero (0) tablets/day (see [Section 6.3.5](#)). Once subjects have completed all study assessments for the Transition Period, they will enter Treatment Period #2.
- **Treatment Period #2:** The 20-week interval starting with administration of the first dose of Treatment Period #2 study medication on the day after the Week 28 Visit (Week 28 + 1 day) and continuing through the time of the Week 48 Follow-up Visit. Treatment Period #2 includes administration of the final dose of Treatment Period #2 study medication at the Week 48 Visit, and ACTH Stimulation testing at the Week 48 Follow-up Visit,  $48 \pm 3$  hours after the final dose of Treatment Period #2 study medication. Subjects who will not participate in the Dose-tapering Period will be discharged from the study following completion of the Week 48 assessments and the ACTH Stimulation Test at the Week 48 Follow-up Visit.
- **Dose-tapering Period:** The 4-week interval following the end of the 20-week Treatment Period #2 during which subjects will have their suspension study medication dose tapered to 0 mg/kg/day (see [Section 6.3.7](#)). Once subjects have completed the Dose-tapering Period, they will be discharged from the study following completion of all final Dose-tapering Period assessments.

3022

3023

The procedures to be completed at each visit during each study period are presented in the Schedule of Study Activities in **Table 11** and in the sections that follow. (Note: In

3024

3025

**Table 11**, each visit with the acceptable time window around the planned visit date,

3026

where applicable, is provided.) Detailed descriptions of the assessments and the

3027

definitions of study endpoints are provided in **Section 7** and **Section 2**, respectively. Any

3028

deviation from study procedures should be noted in the source documents and in the

3029

Clinical Trial Management Software (CTMS), and significant deviations should be

3030

reported immediately to the Sponsor.

3031

Overall, up to approximately 57 weeks are allocated for each subject to complete the

3032

study, including a 32-day Pretreatment Screening Period, a one-day Pretreatment

3033

Baseline Period, a 24-week Treatment Period #1, a 4-week Transition Period, a 20-week

3034

Treatment Period #2, plus a 4-week Dose-Tapering Period, as applicable. Upon the

3035

completion of the study, subjects may have the option to enroll in an additional

3036

vamorolone study or general access program.

3037

Subjects electing to enroll directly into an additional vamorolone study or general access

3038

program to continue vamorolone therapy will be discharged from the VBP15-004 study

3039

following completion of all final Week 48 assessments and ACTH Stimulation testing at

3040

the Week 48 Follow-up Visit, and will be enrolled in the additional vamorolone study or

3041

general access program (separate written protocol and ICF).

3042

Subjects completing the VBP15-004 study and enrolling directly into the additional

3043

vamorolone study or general access program to continue vamorolone treatment do not

3044

need to dose taper in VBP15-004.



**Table 11 Schedule of Study Activities**

| Study Day or Week/Visit                           | Pretreatment Period    |                 | Treatment Period #1 |                      |                      |                       |                       |                                    |                       | Transition Period | Treatment Period #2                |                |                       |                       |                       |                                    |                     | Dose-tapering Period |                                    |
|---------------------------------------------------|------------------------|-----------------|---------------------|----------------------|----------------------|-----------------------|-----------------------|------------------------------------|-----------------------|-------------------|------------------------------------|----------------|-----------------------|-----------------------|-----------------------|------------------------------------|---------------------|----------------------|------------------------------------|
|                                                   | SCR                    | BL              |                     |                      |                      |                       |                       |                                    |                       |                   |                                    |                |                       |                       |                       |                                    |                     |                      |                                    |
|                                                   | Day                    |                 | Week                |                      |                      |                       |                       |                                    |                       |                   |                                    |                |                       |                       |                       |                                    |                     |                      |                                    |
|                                                   | -33 to -2 <sup>a</sup> | -1 <sup>b</sup> | 1 <sup>c</sup>      | 2 (±1d) <sup>d</sup> | 6 (±3d) <sup>d</sup> | 12 (±1w) <sup>d</sup> | 18 (±1w) <sup>d</sup> | 24 <sup>e</sup> (±1w) <sup>d</sup> | 24 (F/U) <sup>e</sup> | 26                | 28 <sup>f</sup> (±1d) <sup>d</sup> | 28+1d          | 30 (±1d) <sup>d</sup> | 34 (±3d) <sup>d</sup> | 40 (±1w) <sup>d</sup> | 48 <sup>g</sup> (±1w) <sup>d</sup> | 48 F/U <sup>g</sup> | 50                   | 52 <sup>h</sup> (±1d) <sup>d</sup> |
| Informed consent                                  | X                      |                 |                     |                      |                      |                       |                       |                                    |                       |                   |                                    |                |                       |                       |                       |                                    |                     |                      |                                    |
| Enrollment <sup>i</sup>                           | X                      |                 |                     |                      |                      |                       |                       |                                    |                       |                   |                                    |                |                       |                       |                       |                                    |                     |                      |                                    |
| Inclusion/exclusion criteria                      | X                      | X <sup>j</sup>  |                     |                      |                      |                       |                       |                                    |                       |                   |                                    |                |                       |                       |                       |                                    |                     |                      |                                    |
| Randomization <sup>k</sup>                        | X                      |                 |                     |                      |                      |                       |                       |                                    |                       |                   |                                    |                |                       |                       |                       |                                    |                     |                      |                                    |
| Demographics                                      | X                      |                 |                     |                      |                      |                       |                       |                                    |                       |                   |                                    |                |                       |                       |                       |                                    |                     |                      |                                    |
| Medical history                                   | X                      |                 |                     |                      |                      |                       |                       |                                    |                       |                   |                                    |                |                       |                       |                       |                                    |                     |                      |                                    |
| Medication history                                | X                      | X               |                     |                      |                      |                       |                       |                                    |                       |                   |                                    |                |                       |                       |                       |                                    |                     |                      |                                    |
| Physical examination                              | X                      | X               |                     | X                    | X                    | X                     | X                     |                                    |                       | X                 |                                    |                | X                     | X                     | X                     |                                    |                     |                      | X                                  |
| Cushingoid features                               |                        | X               |                     | X                    | X                    | X                     | X                     |                                    |                       | X                 |                                    |                | X                     | X                     | X                     |                                    |                     |                      | X                                  |
| Height                                            | X                      |                 |                     |                      |                      | X                     |                       | X                                  |                       |                   |                                    |                | X                     |                       | X                     |                                    |                     |                      |                                    |
| Weight                                            | X                      | X               |                     | X                    | X                    | X                     | X <sup>l</sup>        | X                                  |                       | X                 |                                    | X              | X                     | X <sup>l</sup>        | X                     |                                    |                     |                      | X                                  |
| Vital signs <sup>m</sup>                          | X                      | X               | X <sup>n</sup>      | X                    | X                    | X                     | X                     | X                                  |                       | X                 |                                    | X              | X                     | X                     | X                     |                                    |                     |                      | X                                  |
| Blood for clinical labs <sup>o</sup>              | X                      |                 | X <sup>p</sup>      | X <sup>p</sup>       | X                    | X <sup>p</sup>        | X                     | X <sup>p</sup>                     |                       | X <sup>p</sup>    |                                    | X <sup>p</sup> | X                     | X <sup>p</sup>        | X <sup>p</sup>        |                                    |                     |                      | X <sup>p</sup>                     |
| Blood for HbA1c <sup>o</sup>                      | X                      |                 |                     |                      |                      |                       |                       | X                                  |                       |                   |                                    |                |                       |                       | X                     |                                    |                     |                      |                                    |
| Blood for vitamin D <sup>o</sup>                  | X                      |                 |                     |                      |                      | X                     |                       | X                                  |                       |                   |                                    |                |                       |                       | X                     | X                                  |                     |                      |                                    |
| Confirmation of varicella immunity                | X                      |                 |                     |                      |                      |                       |                       |                                    |                       |                   |                                    |                |                       |                       |                       |                                    |                     |                      |                                    |
| Urinalysis <sup>q</sup>                           | X                      |                 | X <sup>p</sup>      | X <sup>p</sup>       | X                    | X <sup>p</sup>        | X                     | X <sup>p</sup>                     |                       | X <sup>p</sup>    |                                    | X <sup>p</sup> | X                     | X <sup>p</sup>        | X <sup>p</sup>        |                                    |                     |                      | X <sup>p</sup>                     |
| Blood for serum PD biomarker panel <sup>r,s</sup> |                        |                 | X                   |                      |                      | X                     |                       | X                                  |                       | X                 |                                    |                |                       |                       | X                     | X                                  |                     |                      | X                                  |
| Fasting blood for insulin, glucose <sup>s</sup>   |                        |                 | X                   |                      |                      | X                     |                       | X                                  |                       | X                 |                                    |                |                       |                       | X                     | X                                  |                     |                      | X                                  |
| Blood for DNA Testing                             |                        |                 |                     |                      |                      |                       |                       | X                                  |                       |                   |                                    |                |                       |                       |                       |                                    |                     |                      |                                    |
| ACTH Stimulation Test                             | X                      |                 |                     |                      |                      |                       |                       |                                    | X <sup>t</sup>        |                   |                                    |                |                       |                       |                       |                                    | X <sup>t</sup>      |                      |                                    |
| Blood for Plasma PK                               |                        |                 |                     |                      |                      |                       |                       |                                    |                       |                   |                                    |                | X <sup>u</sup>        |                       |                       |                                    |                     |                      |                                    |
| 12-lead ECG <sup>v</sup>                          | X                      |                 |                     |                      | X                    |                       | X                     |                                    |                       |                   |                                    |                |                       |                       | X                     | X                                  |                     |                      |                                    |
| 2D-echocardiogram                                 | X                      |                 |                     |                      |                      |                       |                       | X                                  |                       |                   |                                    |                |                       |                       | X                     |                                    |                     |                      |                                    |

| Study Day or Week/Visit                               | Pretreatment Period    |                 | Treatment Period #1 |                      |                      |                       |                       |                                    | Transition Period     | Treatment Period #2 |                                    |       |                       |                       |                       | Dose-tapering Period               |                     |    |                                    |
|-------------------------------------------------------|------------------------|-----------------|---------------------|----------------------|----------------------|-----------------------|-----------------------|------------------------------------|-----------------------|---------------------|------------------------------------|-------|-----------------------|-----------------------|-----------------------|------------------------------------|---------------------|----|------------------------------------|
|                                                       | SCR                    | BL              |                     |                      |                      |                       |                       |                                    |                       |                     |                                    |       |                       |                       |                       |                                    |                     |    |                                    |
|                                                       | Day                    |                 | Week                |                      |                      |                       |                       |                                    |                       |                     |                                    |       |                       |                       |                       |                                    |                     |    |                                    |
|                                                       | -33 to -2 <sup>a</sup> | -1 <sup>b</sup> | 1 <sup>c</sup>      | 2 (±1d) <sup>d</sup> | 6 (±3d) <sup>d</sup> | 12 (±1w) <sup>d</sup> | 18 (±1w) <sup>d</sup> | 24 <sup>e</sup> (±1w) <sup>d</sup> | 24 (F/U) <sup>e</sup> | 26                  | 28 <sup>f</sup> (±1d) <sup>d</sup> | 28+1d | 30 (±1d) <sup>d</sup> | 34 (±3d) <sup>d</sup> | 40 (±1w) <sup>d</sup> | 48 <sup>g</sup> (±1w) <sup>d</sup> | 48 F/U <sup>g</sup> | 50 | 52 <sup>h</sup> (±1d) <sup>d</sup> |
| Eye examination                                       | X                      |                 |                     |                      |                      |                       |                       | X                                  |                       |                     |                                    |       |                       |                       |                       | X                                  |                     |    |                                    |
| DXA scan                                              | X                      |                 |                     |                      |                      |                       |                       | X                                  |                       |                     |                                    |       |                       |                       |                       | X                                  |                     |    |                                    |
| Spine X-ray                                           | X                      |                 |                     |                      |                      |                       |                       | X                                  |                       |                     |                                    |       |                       |                       |                       | X                                  |                     |    |                                    |
| Fracture Questionnaire                                | X                      |                 |                     |                      |                      |                       |                       | X                                  |                       |                     |                                    |       |                       |                       |                       | X                                  |                     |    |                                    |
| Dispense study medication                             |                        |                 | X                   |                      | X                    | X                     | X                     |                                    | X                     |                     | X                                  |       |                       | X                     | X                     |                                    | X                   |    |                                    |
| Return study medication/<br>compliance monitoring     |                        |                 |                     | X <sup>w</sup>       | X                    | X                     | X                     | X                                  |                       |                     | X                                  |       | X <sup>w</sup>        | X                     | X                     | X                                  |                     |    | X                                  |
| Study medication dosing <sup>x</sup>                  |                        |                 | X                   | →                    |                      |                       |                       | X                                  |                       |                     |                                    | X     | →                     |                       |                       |                                    | X                   |    |                                    |
| Study medication dose tapering                        |                        |                 |                     |                      |                      |                       |                       |                                    | X <sup>y</sup>        | →                   | X                                  |       |                       |                       |                       |                                    | X                   | →  | X                                  |
| Telephone call to subject <sup>z</sup>                |                        |                 |                     |                      |                      |                       |                       |                                    |                       | X                   |                                    |       |                       |                       |                       |                                    |                     | X  |                                    |
| Time to Stand Test (TTSTAND)                          | X                      | X               |                     |                      | X                    | X                     |                       | X                                  |                       |                     |                                    |       |                       | X                     | X                     | X                                  |                     |    |                                    |
| Time to Climb Test (TTCLIMB)                          | X                      | X               |                     |                      |                      | X                     |                       | X                                  |                       |                     |                                    |       |                       |                       | X                     | X                                  |                     |    |                                    |
| Time to Run/Walk Test (TTRW)                          | X                      | X               |                     |                      |                      | X                     |                       | X                                  |                       |                     |                                    |       |                       |                       | X                     | X                                  |                     |    |                                    |
| NSAA <sup>aa</sup>                                    | X                      | X               |                     |                      |                      | X                     |                       | X                                  |                       |                     |                                    |       |                       |                       | X                     | X                                  |                     |    |                                    |
| Myometry (elbow flexors, knee extensors)              | X                      | X               |                     |                      |                      | X                     |                       | X                                  |                       |                     |                                    |       |                       |                       | X                     | X                                  |                     |    |                                    |
| Six-minute Walk Test (6MWT)                           | X                      | X               |                     |                      |                      | X                     |                       | X                                  |                       |                     |                                    |       |                       |                       | X                     | X                                  |                     |    |                                    |
| Range of Motion (ROM) - ankles                        | X                      | X               |                     |                      |                      | X                     |                       | X                                  |                       |                     |                                    |       |                       |                       | X                     | X                                  |                     |    |                                    |
| Pediatric Outcomes Data Collection Instrument (PODCI) | X                      |                 |                     |                      |                      |                       |                       | X                                  |                       |                     |                                    |       |                       |                       |                       | X                                  |                     |    |                                    |
| Treatment Satisfaction Questionnaire (TSQM)           |                        |                 |                     |                      |                      |                       |                       | X                                  |                       |                     |                                    |       |                       |                       |                       | X                                  |                     |    |                                    |

| Study Day or Week/Visit                                          | Pretreatment Period    |                 | Treatment Period #1 |                      |                      |                       |                       |                                    | Transition Period     | Treatment Period #2 |                                    |       |                       |                       |                       | Dose-tapering Period               |                     |    |                                    |
|------------------------------------------------------------------|------------------------|-----------------|---------------------|----------------------|----------------------|-----------------------|-----------------------|------------------------------------|-----------------------|---------------------|------------------------------------|-------|-----------------------|-----------------------|-----------------------|------------------------------------|---------------------|----|------------------------------------|
|                                                                  | SCR                    | BL              |                     |                      |                      |                       |                       |                                    |                       |                     |                                    |       |                       |                       |                       |                                    |                     |    |                                    |
|                                                                  | Day                    |                 | Week                |                      |                      |                       |                       |                                    |                       |                     |                                    |       |                       |                       |                       |                                    |                     |    |                                    |
|                                                                  | -33 to -2 <sup>a</sup> | -1 <sup>b</sup> | 1 <sup>c</sup>      | 2 (±1d) <sup>d</sup> | 6 (±3d) <sup>d</sup> | 12 (±1w) <sup>d</sup> | 18 (±1w) <sup>d</sup> | 24 <sup>e</sup> (±1w) <sup>d</sup> | 24 (F/U) <sup>e</sup> | 26                  | 28 <sup>f</sup> (±1d) <sup>d</sup> | 28+1d | 30 (±1d) <sup>d</sup> | 34 (±3d) <sup>d</sup> | 40 (±1w) <sup>d</sup> | 48 <sup>g</sup> (±1w) <sup>d</sup> | 48 F/U <sup>g</sup> | 50 | 52 <sup>h</sup> (±1d) <sup>d</sup> |
| PARS III                                                         | X                      |                 |                     |                      |                      | X                     |                       | X                                  |                       |                     |                                    |       |                       |                       |                       | X                                  |                     |    |                                    |
| Ease of Study Medication Administration Assessment <sup>bb</sup> |                        |                 |                     | X                    |                      | X                     |                       | X                                  |                       |                     |                                    |       | X                     |                       | X                     | X                                  |                     |    |                                    |
| Blindedness Assessment                                           |                        |                 |                     |                      |                      |                       |                       | X                                  |                       |                     |                                    |       |                       |                       |                       |                                    |                     |    |                                    |
| Dispense subject diaries <sup>cc</sup>                           |                        |                 | X                   | X                    | X                    | X                     | X                     | X                                  |                       | X                   |                                    | X     | X                     | X                     | X                     | X                                  |                     |    |                                    |
| Return subject diaries                                           |                        |                 |                     | X                    | X                    | X                     | X                     | X                                  | X <sup>dd</sup>       | X                   |                                    | X     | X                     | X                     | X                     | X                                  | X <sup>cc</sup>     |    | X                                  |
| AE/SAE recording <sup>ff</sup>                                   | X                      |                 |                     |                      |                      |                       |                       |                                    |                       |                     |                                    |       |                       |                       |                       |                                    |                     |    | X <sup>gg</sup>                    |
| Concomitant medications                                          |                        |                 | X                   |                      |                      |                       |                       |                                    |                       |                     |                                    |       |                       |                       |                       |                                    |                     |    | X                                  |
| Discharge from study                                             |                        |                 |                     |                      |                      |                       |                       |                                    |                       |                     |                                    |       |                       |                       |                       |                                    | X <sup>hh</sup>     |    | X <sup>ii</sup>                    |

BL = Baseline; d = day(s); F/U = Follow-up; SCR = Screening; w = week.

- The Pretreatment Screening Period spans Day -33 through Day -2, but all screening procedures must be completed by Day -11. Subjects meeting all eligibility criteria will be randomized by Day -11, at least 10 days prior to the Baseline Day -1 Visit.
- Baseline Day -1, within 24 hours prior to administration of the first dose of study drug.
- Treatment Day 1 begins at the time of administration of the first dose of study medication in the clinic.
- Time windows around the Week 2, Week 6, Week 12, Week 18, and Week 24 Visits are allowances from date of Day 1 Visit. Time window around the Week 28 Visit is allowance from date of Week 24 F/U Visit. Time windows around the Week 30, Week 34, Week 40, and Week 48 Visits are allowances from date of Week 28+1d Visit. Time window around the Week 52 Visit is allowance from date of Week 48 F/U Visit.
- Subjects who prematurely discontinue from the study prior to Week 24 should complete the Week 24 assessments and the Week 24 Follow-up Visit ACTH Stimulation Test at the time of early withdrawal and undergo Early Discontinuation Dose-tapering, where possible (see [Section 6.4.1](#) and [Section 7.2.7](#)). The Week 24 Follow-up Visit must occur to allow the ACTH Stimulation Test to be performed 48 ± 3 hours after the final dose of Treatment Period #1 study medication.
- Subjects who prematurely discontinue from the study after Week 24 but prior to Week 28 should complete the Week 28 assessments, and undergo Early Discontinuation Dose-tapering, where possible (see [Section 6.4.2](#)).
- Subjects who prematurely discontinue from the study after Week 28 but prior to Week 48 should complete the Week 48 assessments and the Week 48 Follow-up Visit ACTH Stimulation Test at the time of early withdrawal and undergo Dose-tapering, where possible (see [Section 6.4.3](#) and [Section 7.2.7](#)). The Week 48 Follow-up Visit must occur to allow the ACTH Stimulation Test to be performed 48 ± 3 hours after the final dose of Treatment Period #2 study medication.
- Subjects will have one study site visit during the Dose-tapering Period, at one week after the dose of liquid formulation has been discontinued (Week 52) (see [Section 6.3.7](#)).
- Subjects are considered to be enrolled in the study at the time written informed consent is obtained.

- 74  
75  
76  
77 j. Study eligibility should be rechecked and confirmed at Baseline Day -1 Visit.  
78 k. Randomization occurs by Interactive Voice/Web Response System (IXRS) after subjects are confirmed to have met all study entry criteria, at least 10 days prior to the Baseline Day -1 Visit.  
79 l. Weight recorded at the Week 18 Visit and the Week 40 Visit will be used to calculate doses for study drug dispensed at the Week 24 Follow-up and Week 48 Follow-up Visits, respectively.  
80 m. Sitting blood pressure, body temperature, respiratory rate, and heart rate.  
81 n. Vital signs recorded prior to administration of the first dose of study drug at the Day 1 Visit.  
82 o. Blood for hematology, chemistry, and lipids, including HbA1c and Vitamin D where applicable.  
83 p. Blood samples (collected after subjects have fasted for  $\geq 6$  hours) and urine collected at scheduled visit, and prior to dose of study drug where applicable.  
84 q. Urinalysis by dipstick and microscopic analysis.  
85 r. Blood collected for PD biomarkers includes secondary safety outcomes (morning cortisol, osteocalcin, CTX1, PINP), and exploratory safety and efficacy PD biomarkers.  
86 s. Blood samples for PD biomarkers and fasting glucose and insulin determination will be collected after subjects have fasted for  $\geq 6$  hours, prior to the daily dose of study medication where  
87 applicable.  
88 t. Subjects will return to the study site for the Week 24 Follow-up Visit for an ACTH Stimulation Test 48 hours  $\pm$  3 hours after administration of the final dose of Treatment Period #1 study  
89 medication, and for the Week 48 Follow-up Visit for an ACTH Stimulation Test 48 hours  $\pm$  3 hours after administration of the final dose of Treatment Period #2 study medication (see  
90 [Section 7.2.7](#)).  
91 u. Blood sample for population PK analysis will be collected 2 hours after administration of the daily dose of study medication.  
92 v. 12-lead ECG recorded after subject has rested quietly in a supine position for at least 5 minutes.  
93 w. Study medication brought by subjects to the Week 2 Visit and Week 30 Visit for dosing and compliance assessment will be redispensed to subjects at the end of the visit.  
94 x. The dose of study medication on the days of the Day 1, Week 2, Week 12, Week 24, Week 28, Week 30, Week 40, and Week 48 Visits will be administered after 1) fasting blood draws; and  
95 2) breakfast provided by the study site. All other doses will be taken at home. See [Section 6.3.3](#) for other Day 1 pre-dose safety assessments.  
96 y. Doses of tablet study drug will be tapered and suspension study drug will be continued, during Weeks 24-28.  
97 z. Site study staff will contact the parent(s)/guardian(s) by telephone at Weeks 26 and 50 to ensure that the study drug tapering is proceeding according to protocol, to assess potential signs or  
98 symptoms indicative of adrenal suppression, and to address any questions the parent(s)/guardian(s) may have.  
99 aa. North Star Ambulatory Assessment; includes the Time to Stand Test (TTSTAND).  
00 bb. Ease of Study Medication Administration assessed at the Weeks 2, 12, and 24, 30, 40, and 48 Visits.  
01 cc. Subject diaries used to record any changes in concomitant medications taken, any AEs experienced during the study, and any incomplete or missed doses of study medication.  
02 dd. Subject diaries dispensed at the Week 24 Visit will be returned and redispensed at the Week 24 F/U Visit; final return will occur at the Week 28 Visit.  
03 ee. Subject diaries dispensed at the Week 48 Visit will be returned at the Week 48 F/U Visit, and will be redispensed to subjects participating in the Dose-tapering Period for final return at the Week  
04 52 Visit.  
05 ff. All AEs and SAEs must be recorded in the source documents and eCRF from the date of the subject's written informed consent until the final Week 52 Visit or the subject's participation in the  
06 study is completed (SAEs through 30 days after final study drug dose). Ongoing AEs will be followed to resolution, stabilization, or until such time the Investigator agrees follow-up is not  
07 necessary.  
08 gg. For subjects who do not continue to receive vamorolone through an additional vamorolone study or general access program, site staff will make a phone call to the home 31-35 days after the final  
09 dose of study medication in VBP15-004 Dose-tapering Period to confirm the final SAE status of the subject.

10  
11  
12  
13  
14  
15

- hh. Subjects who elect to continue vamorolone therapy by enrolling directly into an additional vamorolone study or general access program may be discharged from the study following completion of all final Week 48 assessments, including the Week 48 Follow-up Visit ACTH Stimulation Test.
- ii. Subjects who participate in the Dose-tapering Period may be discharged from the study following completion of all final Dose-Tapering Visit assessments (Week 52) (see [Section 6.3.7](#)).

3116

3117

## 6.2 Informed Consent and Assent Procedures

3118

3119

Subjects are considered to be enrolled in the study at the time written informed consent is obtained.

3120

3121

The parent(s) or guardian(s) of all subjects are to give informed consent in accordance within the Declaration of Helsinki, US 21 Code of Federal Regulations (CFR) Part 50, International Conference on Harmonisation [ICH] guidelines on GCP and all applicable laws, guidances, and directives of the jurisdiction where the study is being conducted.

3122

3123

3124

3125

The parent(s) or guardian(s) of subjects who choose to enroll in this study will give written informed consent at the Screening Visit, Day -33 to Day -11. The Investigator (or designated staff) will obtain the written informed consent from the subject's parent(s) or guardian(s) prior to any study-specific procedures. Each subject's parent(s) or guardian(s) will receive an explanation of the nature and purposes of the study from the Investigator or designee. Time will be given to the parent(s)/guardian(s) to ask questions and make their decision on whether they would like for their child to participate. The Investigator or designee will ensure the study is appropriate for the subject. Reasons for exclusion will be documented for subjects found ineligible during the Pretreatment Period. The subject's parent(s) or guardian(s) will be asked if s/he understands that the study is for research purposes only and that it may not provide any therapeutic benefit to the subject. Each subject's parent(s) or guardian(s) will be asked if s/he understands that the subject is free to withdraw from the study at any time without prejudice. Each subject's parent(s) or guardian(s) will be required to sign a study ICF (and HIPAA authorization, if applicable) before any procedures are performed for the study; both parents or guardians will sign the ICF in jurisdictions where this is required.

3126

3127

3128

3129

3130

3131

3132

3133

3134

3135

3136

3137

3138

3139

3140

3141

If applicable, the assent of the child himself will also be obtained, if possible in writing per individual where a child is intellectually capable of assenting (and in accordance with local regulations), and with the permission of the parent(s)/guardian(s).

3142

3143

3144

The Investigator or designee will obtain written informed consent from each subject's parent(s) or guardian(s) prior to subject's participation in the study using ICFs approved by the appropriate IRB/IEC at each site. Consent must be obtained in accordance with

3145

3146

3147  
3148 the principles outlined in the current version of the Declaration of Helsinki. Informed  
3149 Consent Forms must be dated and signed by the Investigator or designee and the subject's  
3150 legal representative(s) and the original signed consent form must be kept by the  
3151 Investigator in the study subject's file. "Legal representative" means an individual whom  
3152 a judicial or other body authorized under applicable law to consent on behalf of a  
3153 prospective study subject to the subject's participation in the procedure(s) involved in the  
3154 research. The Study Monitor will ensure that the ICF has been signed by the subject's  
3155 legal representative(s). The study subject's legal representative(s) will receive a copy of  
3156 the signed consent form.

### 3157 **6.2.1 HIPAA and Protected Health Information**

3158  
3159 In the applicable countries, during the informed consent procedure, the Investigator or  
3160 designee will review the elements of the HIPAA and Protected Health Information (PHI)  
3161 with each subject's parent(s) or guardian(s), and each subject's parent or guardian will  
3162 confirm that s/he understands HIPAA authorization and PHI. The Investigator (or  
3163 designated staff) will obtain HIPAA authorization from the subject's parent(s) or  
3164 guardian(s) on the appropriate IRB/IEC-approved form at each site, prior to any  
3165 study-related procedures.

### 3167 **6.3 Visit Schedule and Procedures**

3168  
3169 During the study, there will be a total of up to 16 study site visits: Pretreatment Screening  
3170 Visit (screening procedures can be performed on more than one day if necessary);  
3171 Pretreatment Baseline Day -1 Visit; Treatment Period #1 Day 1 and Weeks 2, 6, 12, 18,  
3172 and 24 Visits, and Week 24 Follow-up Visit; Transition Period Week 28 Visit; Treatment  
3173 Period #2 Weeks 30, 34, 40, 48 Visits, and Week 48 Follow-up Visit; and final Dose-  
3174 tapering Period Week 52 Visit. In addition, to facilitate completion of all required  
3175 Week 24 and Week 48 assessments, some of the assessments scheduled for the Week 24  
3176 and Week 48 Visits may be completed on the day following the Week 24 (Week 48) dose  
3177 of study medication, the day of the Week 24 (Week 48) Follow-up Visit, or in some cases  
3178 up to 7 days following the date of the Week 24 (Week 48) dose of study medication, if  
3179 needed (see [Section 6.3.4](#) and [Section 6.3.6](#)).

3180  
3181 Each subject will receive the double-blind study medication at stable daily dose for an  
3182 initial period of 24 weeks (Treatment Period #1). Following completion of the 24-week  
3183 Treatment Period #1, all subjects will continue to receive the suspension formulation  
3184 (vamorolone or matching placebo) at the same dose they received during the Treatment  
3185 Period #1, while tapering the number of tablets (prednisone or matching placebo) during  
3186 the 4-week double-blind Transition Period, and will return to the study site for study  
3187 assessments at the end of the Transition Period (Week 28), prior to receiving the first  
3188 dose of study medication for Treatment Period #2 at home on Week 28 + 1 day.

3189 Each subject will receive double-blind study medication at stable daily dose for a period  
3190 of 20 weeks (Treatment Period #2). Following completion of the 20-week Treatment  
3191 Period #2, all subjects who will not be continuing to receive vamorolone in an additional  
3192 vamorolone study or general access program (separate protocol) will taper their liquid  
3193 formulation study medication during the 4-week double-blind Dose-Tapering Period, and  
3194 will return to the study site for study assessments at the end of the Dose-Tapering Period  
3195 (Week 52). See [Section 7](#) for a detailed description of the safety, clinical efficacy, PD,  
3196 and PK assessments to be performed in this study.

3197 **6.3.1 Screening Period (Day -33 to -2)**

3198  
3199 The Investigator or study staff will discuss with each subject and the subject's parent(s)  
3200 or legal guardian(s) the nature and purpose of the study and the required study  
3201 procedures. The subject's medical history and medication history will be reviewed to  
3202 determine initial eligibility for participation in the study and the subject's de-identified  
3203 dystrophin genetic test report and/or muscle biopsy report will be sent to the Central  
3204 Genetic Counselor(s) for confirmation that the subject meets the DMD diagnostic  
3205 inclusion criteria.

3206 Following the signing of the written ICF, subjects will be considered to be enrolled in the  
3207 study, and will be assigned a unique site-specific 6-digit subject study number that will  
3208 be comprised of protocol, site, and subject numbers in sequential order of screening into  
3209 the study. All data will be identified using the unique subject study number. The site  
3210 Investigator will keep a record relating the names of the subjects to their subject study



3211  
3212 numbers (subject identification log) to permit efficient verification of data subject files,  
3213 when required. This record will also include the dates of subject enrollment and  
3214 completion/termination. The Coordinating Center will not collect names or other  
3215 identifiers except dates (diagnosis, study visits), date of birth, and the subject study  
3216 number.

3217 Subjects will undergo the procedures in the bulleted list below during the Screening  
3218 Period. The procedures may be completed over the course of several visits, if necessary,  
3219 but all scheduled Screening procedures must be completed within the timeframe of  
3220 Day -33 to Day -11, and the actual date each procedure is performed must be recorded in  
3221 the source document and eCRF. Any parameter/test may be repeated at the Investigator's  
3222 discretion during Pretreatment Screening to determine reproducibility. In addition,  
3223 subjects may be rescreened if ineligible due to a transient condition which would prevent  
3224 the subject from participating, such as an upper respiratory tract infection.

3225 Subjects meeting all Screening eligibility tests will be randomized to treatment during the  
3226 Screening Period.

- 3227 • Review of the Inclusion and Exclusion Criteria (see [Sections 4.2](#) and [4.3](#))
- 3228
- 3229 • Recording of the medical history, including any toxicities or allergy-related  
3230 events to prior treatments (see [Section 7.2.1](#))
- 3231 • Recording of prior medications (Medication History) (see [Section 5.7.1](#))
- 3232
- 3233 • Complete physical examination, including weight (in kilograms) and height  
3234 (in cm) (see [Section 7.2.2](#))
- 3235 • Recording of vital signs (sitting blood pressure, heart rate, body temperature,  
3236 respiratory rate) (see [Section 7.2.3](#))
- 3237 • Collection of blood for clinical laboratory testing (hematology, clinical  
3238 chemistry, lipids, HbA1c, and vitamin D) and collection of urine for urinalysis  
3239 (see [Section 7.2.4](#))
- 3240 • Testing for chicken pox immunity (see [Section 7.2.5](#))

3241

3242

- 12-lead ECG (see [Section 7.2.10](#))

3243

3244

- 2D-echocardiogram (see [Section 7.2.11](#))

3245

3246

- Time to Stand Test (TTSTAND) (see [Section 7.3.1](#))

3247

3248

- Time to Climb Test (TTCLIMB) (see [Section 7.3.2](#))

3249

3250

- Time to Run/Walk Test (TTRW) (see [Section 7.3.3](#))

3251

3252

- North Star Ambulatory Assessment (NSAA) (see [Section 7.3.4](#))

3253

3254

- Six-minute Walk Test (6MWT) (see [Section 7.3.5](#))

3255

3256

- Hand-held myometry (elbow flexors and knee extensors) (see [Section 7.3.6](#))

3257

3258

- Range of Motion (ROM) in the ankles (see [Section 7.3.7](#))

3259

3260

- Eye exam (see [Section 7.2.12](#))

3261

3262

- DXA scan (see [Section 7.2.13](#))

3263

3264

- Spine X-rays (see [Section 7.2.14](#))

3265

3266

- ACTH Stimulation Test (see [Section 7.2.7](#))

3267

3268

- Pediatric Outcomes Data Collection Instrument questionnaire (PODCI) (see [Section 7.4.1](#))

3269

3270

- PARS III questionnaire (see [Section 7.4.3](#))

3271

3272

- Recording of AEs and SAEs beginning at the time written informed consent is obtained (see [Section 7.5](#))

3273

3274

3275

- Randomization (see [Section 3.2](#))

3276

3277

3278

3279

### **6.3.2 Baseline Period (Day -1) Visit**

3280

Subjects who have met all study eligibility criteria and been randomized to treatment via IXRS during the Screening Period, and for whom subject-specific blinded study medication has been shipped to and received by the study site will return to the study site during the Pretreatment Baseline Period (Day -1, the 24-hour interval immediately

3281

3282

3283

3284

3285

3283  
3284 preceding administration of the first dose of study medication) for baseline assessments.  
3285 Subjects will retain their 6-digit study identification number which was assigned during  
3286 the Screening Period.

3287  
3288 The following procedures will be completed at the Baseline Day -1 Visit:

- 3289 • Physical examination including weight (in kilograms) and assessment of
- 3290 • cushingoid features (see [Section 7.2.2](#))
- 3291
- 3292 • Recording of vital signs (sitting blood pressure, heart rate, body temperature,
- 3293 • respiratory rate) (see [Section 7.2.3](#))
- 3294 • Time to Stand Test (TTSTAND) (see [Section 7.3.1](#))
- 3295
- 3296 • Time to Climb Test (TTCLIMB) (see [Section 7.3.2](#))
- 3297
- 3298 • Time to Run/Walk Test (TTRW) (see (see [Section 7.3.3](#)))
- 3299
- 3300 • North Star Ambulatory Assessment (NSAA) (see [Section 7.3.4](#))
- 3301
- 3302 • Six-minute Walk Test (6MWT) (see [Section 7.3.5](#))
- 3303
- 3304 • Hand-held myometry (elbow flexors and knee extensors) (see [Section 7.3.6](#))
- 3305
- 3306 • Range of Motion (ROM) in the ankles (see [Section 7.3.7](#))
- 3307
- 3308 • Recording of AEs and SAEs; review of all AEs for resolution status and date
- 3309 • (see [Section 7.5](#))
- 3310 • Recording of prior medications (Medication History) (see [Section 5.7.1](#))
- 3311

### 3312 **6.3.3 Treatment Period #1 Day 1 Visit**

3313  
3314 At the Treatment Period #1 Day 1 Visit, certain procedures will be performed prior to  
3315 administration of the first dose of study drug and are listed in this section. Treatment  
3316 Period #1 Day 1, for purposes of the study analyses, begins with administration of the  
3317 first dose of study medication.

3318 Subjects will take the first dose of study medication in clinic on the day after the  
3319 Pretreatment Baseline Visit. Subjects must have fasted  $\geq 6$  hours prior to arrival at the

3320  
3321 study site for the Day 1 Visit. Breakfast, including at least 8 g of fat (8 ounces [240 mL]  
3322 of full-fat milk or equivalent high-fat food portion) will be served at the study site after  
3323 the blood and urine collections for clinical laboratory tests and the blood draw for PD  
3324 biomarkers, including insulin and glucose, and within 30 minutes prior to administration  
3325 of the dose of study medication.

3326 Subjects will receive a medical “alert” card stating that participation in the study may  
3327 increase the subjects’ risk of adrenal suppression. The card will include instructions for  
3328 families and clinicians regarding management of possible adrenal suppression during  
3329 emergencies, including coverage with “stress doses” of hydrocortisone (or prednisone)  
3330 during times of illness, injury, or surgery.

3331 The following procedures will be completed at the Treatment Period #1 Day 1 Visit:

- 3332
- 3333 • Recording of vital signs (sitting blood pressure, heart rate, body temperature,  
3334 respiratory rate) prior to administration of first dose of study drug (see  
3335 [Section 7.2.3](#))
  - 3336 • Clinical laboratory evaluation including hematology, clinical chemistry, lipids,  
3337 and urinalysis tests, prior to administration of first dose of study drug (see  
3338 [Section 7.2.4](#))
  - 3339 • Blood samples for fasted glucose and insulin, prior to administration of first dose  
3340 of study drug (see [Section 7.2.6](#))
  - 3341 • Blood samples for PD biomarkers including osteocalcin, CTX1, serum  
3342 aminoterminal propeptide of type I collagen (P1NP), and cortisol, prior to  
3343 administration of first dose of study drug (see [Section 7.2.6](#)). Blood remaining  
3344 from collected samples not needed for protocol-specified analyses may be stored  
3345 for future exploratory biomarker studies.
  - 3346 • Dispensing of study medication and administration of first dose (see [Section 5.8.1](#)  
3347 and [Section 5.3](#), respectively)
  - 3348 • Dispensing of subject diary (see [Section 7.4.6](#))  
3349

3350

3351

- Recording of AEs and SAEs; review of all AEs for resolution status and date

3352

(see [Section 7.5](#))

3353

- Recording of concomitant medications (see [Section 5.7](#))

3354

3355

On Day 1, the subject will be discharged from the clinic after completion of all scheduled assessments.

3356

3357

#### **6.3.4 Treatment Period #1 (Weeks 1-24)**

3358

3359

Subjects will return to the study site for safety, efficacy, and PD assessments beginning at Week 2 and continuing through the Week 24 Follow-up Visit, according to the schedule of visits in [Table 11](#).

3360

3361

3362

Subjects will continue to receive daily oral administration of vamorolone/placebo suspension and prednisone/placebo tablets throughout the 24-week Treatment Period #1. The daily dose of study medication should be taken with breakfast, including at least 8 g of fat (8 ounces [240 mL] of full-fat milk or equivalent high-fat food portion).

3363

3364

3365

3366

Dosing is to occur at home throughout the 24-week Treatment Period #1, except at the Weeks 2, 12 and 24 study visits when dosing will occur at the study site. Subjects must have fasted  $\geq 6$  hours prior to arrival at the study site for the Weeks 2, 12, and 24 study visits. Breakfast, including at least 8 g of fat (8 ounces [240 mL] of full-fat milk or equivalent high-fat food portion) will be served at the study site after the blood and urine collections for clinical laboratory tests and the blood draws for PD biomarkers, including insulin and glucose (Weeks 12 and 24 only), and within 30 minutes prior to administration of the dose of study medication. Ease of administration of the suspension study medication will be assessed at the Weeks 2, 12, and 24 Visits. Apart from blood and urine sample collections, all other scheduled assessments should be performed after administration of the study medication in clinic.

3367

3368

3369

3370

3371

3372

3373

3374

3375

3376

3377

Study medication will be dispensed at Weeks 6, 12, 18, and at the Week 24 Follow-up Visit, and returned at Weeks 2 (compliance monitoring only; will be redispensed at end of visit), 6, 12, 18, and 24 for all subjects. Subjects will receive subject diaries at each study visit and return the diaries at each subsequent visit. Diaries will be reviewed with

3378

3379

3380

3381

3382 the subject's parent or guardian by the study staff to assess AEs, changes to concomitant  
3383 medications/therapies, and any missed or incomplete doses of study medication.

3384 Limited safety assessments will be conducted at the Week 2 Visit.

3385

3386

3387

3388

3389

3390

3391

3392

3393

3394

3395

3396

3397

3398

3399

3400

3401

3402 There is flexibility in the timing of completion of some of the scheduled Week 24  
3403 assessments. The scheduled physical examination, weight, vital signs, clinical laboratory  
3404 tests, blood draws for PD biomarker analysis and DNA testing, Ease of Study Medication  
3405 Administration Assessment, PODCI, PARS III, and functional assessments (TTSTAND,  
3406 TTCLIMB, TTRW, NSAA, 6MWT, hand-held myometry, ROM) must all be performed  
3407 on the date of the final Week 24 dose of Treatment Period #1 study medication. The  
3408 12-lead ECG may be performed on the date of the final Week 24 dose of study  
3409 medication, the day following the final Week 24 dose of study medication, or the day of  
3410 the Week 24 Follow-up Visit. Completion of the DXA scan, spine X-ray, Fracture  
3411 Questionnaire, 2-D echocardiography, eye examination, TSQM, and Blindedness

3412  
3413 Assessment may be performed on the date of the final Week 24 dose of study medication  
3414 or up to 7 days following the date of the final Week 24 dose of study medication to  
3415 accommodate need for additional scheduling flexibility.

3416 At the Week 24 Visit, all subjects will be dispensed a single dose of oral hydrocortisone  
3417 (5 mg or 10 mg) to be administered 24 hours after administration of the final dose of  
3418 study medication at the Week 24 Visit. The hydrocortisone dose will be approximately  
3419  $8 \text{ mg/m}^2$ , rounded up to either 5 mg or 10 mg; subjects will be provided with either a  
3420 single 5 mg or 10 mg hydrocortisone tablet which will be dispensed by the site staff at the  
3421 Week 24 Visit (see Manual of Operations for details).

3422 Subjects will return to the study site approximately 48 hours after administration of the  
3423 Week 24 dose of Treatment Period #1 study medication (and approximately 24 hours  
3424 after the oral hydrocortisone) for ACTH Stimulation testing. The ACTH Stimulation  
3425 Test will be performed in the morning, before 12 noon local time,  $48 \pm 3$  hours after  
3426 administration of the final dose of Treatment Period #1 study medication, and prior to  
3427 administration of the first dose of study drug in the Transition Period (see Manual of  
3428 Operations for details).

3429 At the end of the 24-week Treatment Period, including the Week 24 Follow-up Visit for  
3430 the ACTH Stimulation Test, all subjects will begin a 4-week double-blind Transition  
3431 Period during which the doses of the tablet study medication will be progressively  
3432 reduced and discontinued (see [Section 6.3.5](#)). Subjects will take the first doses of study  
3433 medication in the Transition Period with a high-fat meal on the same day as the Week 24  
3434 Follow-up Visit ACTH Stimulation Test, as soon as possible after ACTH Stimulation  
3435 testing has been completed.

### 3436 **6.3.5 Transition Period (Weeks 25-28)**

3437  
3438 All subjects will participate in the 4-week double-blind dose Transition Period. During  
3439 this period, all subjects will continue on the same dose of their liquid formulation (either  
3440 vamorolone or matching placebo) as they were administered during Treatment Period #1  
3441 and will have dose-tapering of their prednisone or matching placebo tablets as outlined in

3442

3443

**Table 12.** This tapering is to aid in re-establishment of adrenal function if adrenal suppression has occurred in the prednisone-treated patients.

3444

3445

**Table 12. Tablet Dose Tapering**

3446

| Treatment Period Dose<br>(No. tabs) | Week 25 Dose<br>(No. tabs) | Week 26 Dose<br>(No. tabs) | Week 27 Dose<br>(No. tabs) | Week 28 Dose<br>(No. tabs) |
|-------------------------------------|----------------------------|----------------------------|----------------------------|----------------------------|
| 2                                   | 1                          | 0                          |                            |                            |
| 3                                   | 2                          | 1                          | 0                          |                            |
| 4                                   | 3                          | 2                          | 1                          | 0                          |
| 5                                   | 3                          | 2                          | 1                          | 0                          |

3447

No. = number; tabs = tablets.

3448

3449

Subjects will take the first doses of study medication in the Transition Period with a high-fat meal on the same day as the Week 24 Follow-up Visit ACTH Stimulation Test, as soon as possible after ACTH Stimulation testing has been completed.

3450

3451

3452

Site study staff will contact the parent(s)/guardian(s) by telephone at Week 26 to ensure that the tablet tapering is proceeding according to protocol, to assess potential signs or symptoms indicative of adrenal suppression, and to address any questions the parent(s)/guardian(s) may have. In addition, subjects will be assessed promptly for adrenal suppression if unwell at any time during the Transition Period. There will be a low threshold for recommending commencement of daily oral prednisone or hydrocortisone, or intravenous hydrocortisone if hospitalization occurs in these circumstances.

3453

3454

3455

3456

3457

3458

3459

3460

Each subject will return to the study site for Week 28 safety study assessments.

3461

3462

Subjects must have fasted  $\geq 6$  hours prior to arrival at the study site for the Week 28 Visit. Breakfast will be served at the study site after the blood and urine collection for clinical laboratory tests and the blood draw for PD biomarkers, including fasting glucose and insulin. At the Week 28 Visit, subjects will also have a physical examination with weight, assessment of cushingoid features and vital signs recorded. Study medication will be returned for compliance monitoring. Adverse events, including SAEs, and concomitant medications will be assessed. Subject diaries will be returned and reviewed with site staff.

3463

3464

3465

3466

3467

3468

3469



3470

3471

**6.3.6 Treatment Period #2 (Week 28 + 1 Day through Week 48)**

3472

3473

Subjects will take the first dose of study medication in Treatment Period #2 at home on the day after the Week 28 Visit (Week 28 + 1 day). There is no scheduled study visit at Week 28 + 1 day.

3476

3477

3478

3479

Subjects will return to the study site for safety, efficacy, and PD assessments beginning at Week 30 and continuing through the Week 48 Follow-up Visit, according to the schedule of visits in **Table 11**. Population PK assessments will be performed on blood collected at the Week 30 Visit only.

3480

3481

3482

3483

Subjects will receive daily oral administration of vamorolone suspension throughout the 20-week Treatment Period #2, from Week 28+ 1 day through the day of the Week 48 Visit. The daily dose of study medication should be taken with breakfast, including at least 8 g of fat (8 ounces [240 mL] of full-fat milk or equivalent high-fat food portion).

3484

3485

3486

3487

3488

3489

3490

3491

3492

3493

3494

Dosing is to occur at home throughout the 20-week Treatment Period #2 except at the Weeks 30, 40, and 48 study visits when dosing will occur at the study site. Subjects must have fasted  $\geq 6$  hours prior to arrival at the study site for the Weeks 30, 40, and 48 study visits. Breakfast, including at least 8 g of fat (8 ounces [240 mL] of full-fat milk or equivalent high-fat food portion) will be served at the study site after the blood and urine collections for clinical laboratory tests and the blood draws for PD biomarkers, including insulin and glucose (Weeks 40 and 48 only), and within 30 minutes prior to administration of the dose of study medication. Ease of suspension study medication administration will be assessed at the Weeks 30, 40, and 48 Visits. Apart from blood and urine sample collections, all other scheduled assessments should be performed after administration of the study medication in clinic.

3495

3496

3497

3498

3499

Study medication will be dispensed at Weeks 34, 40, and at the Week 48 Follow-up Visit (for subjects participating in the Dose-tapering Period only), and returned at Weeks 30 (compliance monitoring only; will be redispensed at end of visit), 34, 40, and 48 for all subjects. Subjects will receive subject diaries at each study visit and return the diaries at each subsequent visit. Diaries will be reviewed with the subject's parent or guardian by

3500

3501 the study staff to assess AEs, changes to concomitant medications/therapies, and any  
3502 missed or incomplete doses of study medication.

3503 Limited safety assessments and blood draw for population PK analysis will be conducted  
3504 at the Week 30 Visit.

3505 Clinical efficacy assessments (TTSTAND, TTRW, TTCLIMB, NSAA, 6MWT,  
3506 hand-held myometry, and ROM) and the subject reported outcomes (TSQM, PODCI,  
3507 Ease of Study Medication Administration Assessment, and PARS III) will be conducted  
3508 as specified in the schedule of study activities (**Table 11**). Weight will be recorded at  
3509 every visit and height will be measured at Weeks 34 and 48. Vital signs will be recorded  
3510 at each study visit. A physical examination including assessment of cushingoid features  
3511 will be performed at Weeks 34, 40, and 48. A 12-lead ECG will be recorded at Weeks 40  
3512 and 48. 2D-echocardiography will be performed at Week 48. Blood and urine samples  
3513 for clinical laboratory tests and blood for the serum PD biomarker panel will be collected  
3514 at scheduled visits throughout Treatment Period #2 (**Table 11**). A blood sample for  
3515 plasma PK will be collected at Week 30, two hours following dosing. An eye  
3516 examination to exclude cataracts and glaucoma will be performed at Week 48. A DXA  
3517 scan will be performed at Week 48. Adverse events, including SAEs, and concomitant  
3518 medications will be assessed at each study visit and recorded throughout the study.

3519 There is flexibility in the timing of completion of some of the scheduled Week 48  
3520 assessments. The scheduled physical examination, weight, vital signs, clinical laboratory  
3521 tests, blood draws for PD biomarker analysis, Ease of Study Medication Administration  
3522 Assessment, PODCI, PARS III, and functional assessments (TTSTAND, TTCLIMB,  
3523 TTRW, NSAA, 6MWT, hand-held myometry, ROM) must all be performed on the date  
3524 of the final Week 48 dose of Treatment Period #2 study medication. The 12-lead ECG  
3525 may be performed on the date of the final Week 48 dose of study medication, the day  
3526 following the final Week 48 dose of study medication, or the day of the Week 48 Follow-  
3527 up Visit. Completion of the DXA scan, Fracture Questionnaire, 2-D echocardiography,  
3528 eye examination, and TSQM, may be performed on the date of the final Week 48 dose of  
3529 study medication, the day following the Week 48 dose of study medication, or the day of

3530  
3531 the Week 48 Follow-up Visit (for subjects receiving vamorolone therapy by enrolling  
3532 directly into an additional vamorolone study or general access program), or up to 7 days  
3533 following the date of the final Week 48 dose of study medication (for subjects  
3534 participating in the Dose-tapering Period) to accommodate need for additional scheduling  
3535 flexibility.

3536 At the Week 48 Visit, all subjects will be dispensed a single dose of oral hydrocortisone  
3537 (5 mg or 10 mg) to be administered 24 hours after administration of the final dose of  
3538 study medication at the Week 48 Visit. The hydrocortisone dose will be approximately  
3539  $8 \text{ mg/m}^2$ , rounded up to either 5 mg or 10 mg; subjects will be provided with either a  
3540 single 5 mg or 10 mg hydrocortisone tablet which will be dispensed by the site staff at the  
3541 Week 48 Visit (see Manual of Operations for details).

3542 Subjects will return to the study site approximately 48 hours after administration of the  
3543 final (Week 48) dose of Treatment Period #2 study medication (and approximately 24  
3544 hours after the oral hydrocortisone) for ACTH Stimulation testing. The ACTH  
3545 Stimulation Test will be performed in the morning, before 12 noon local time,  $48 \pm 3$   
3546 hours after administration of the final Treatment Period #2 dose of study medication, and  
3547 prior to administration of the first dose of study drug in the Dose-tapering Period if the  
3548 subject is to taper, or prior to the first dose of study medication in the additional  
3549 vamorolone study or general access program for subjects transitioning directly to that  
3550 protocol (see Manual of Operations for details).

3551 At the end of the 20-week Treatment Period #2, including the Week 48 Follow-up Visit  
3552 for the ACTH Stimulation Test, subjects may be given the option of continuing  
3553 vamorolone therapy by enrolling into an additional vamorolone study or general access  
3554 program. Subjects enrolling directly into an additional vamorolone study or general  
3555 access program will not need to taper their vamorolone dose prior to enrollment. All  
3556 other subjects will begin a 4-week double-blind Dose-tapering Period during which the  
3557 doses of suspension study medication will be progressively reduced and discontinued  
3558 (see [Section 6.3.7](#)).

3559  
3560 Subjects who will not participate in the Dose-tapering Period (see [Section 6.3.7](#)) will be  
3561 discharged from the study following completion of all Week 48 assessments, including  
3562 the Week 48 Follow-up Visit ACTH Stimulation Test. Subjects who do participate in the  
3563 Dose-tapering Period will be dispensed vamorolone at the Week 48 Follow-up Visit, as  
3564 well as instructions for tapering the dose of vamorolone during the Dose-tapering Period.  
3565 Subjects will take the first dose of study medication in the Dose-tapering Period with a  
3566 high-fat meal on the same day as the Week 48 Follow-up Visit ACTH Stimulation Test,  
3567 as soon as possible after ACTH Stimulation testing has been completed.

3568 **6.3.7 Dose-tapering Period (Weeks 49-52)**

3569  
3570 All subjects who complete the study and opt not to continue vamorolone therapy by  
3571 enrolling into an additional vamorolone study or general access program will participate  
3572 in a 4-week double-blind Dose-tapering Period during which the doses of suspension  
3573 study medication will be progressively reduced and discontinued. In addition, subjects  
3574 who discontinue study medication after Week 28 and prior to Week 48 will also  
3575 participate in the Dose-tapering Period if possible and if, in the opinion of the  
3576 Investigator, it is safe to do so. The purpose of dose-tapering is to aid in re-establishment  
3577 of adrenal function if adrenal suppression has occurred during vamorolone treatment.  
3578 Dose tapering will be performed in a stepwise manner, according to the subject's most  
3579 recent calculated liquid formulation dose during the 20-week Treatment Period #2.

3580 Dose tapering for the liquid formulation (vamorolone) will be performed as outlined in  
3581 [Table 13](#). For subjects who have completed Treatment Period #2, the subject's weight  
3582 recorded at the Week 40 Visit will be used to calculate dose volume for all dose  
3583 de-escalations during the Dose-tapering Period.

3584  
3585 **Table 13. Suspension Dose Tapering**  
3586

| Treatment Period #2<br>Dose Level | Week 49<br>Dose Level | Week 50<br>Dose Level | Week 51<br>Dose Level | Week 52<br>Dose Level |
|-----------------------------------|-----------------------|-----------------------|-----------------------|-----------------------|
| Formulation: 100%                 | 50%                   | 25%                   | 10%                   | 0%                    |

3587

3588 Subjects will take the first dose of study medication in the Dose-tapering Period with a  
3589 high-fat meal on the same day as the Week 48 Follow-up Visit ACTH Stimulation Test,  
3590 as soon as possible after ACTH Stimulation testing has been completed.

3591 Site study staff will contact the parent(s)/guardian(s) by telephone at Week 50 to ensure  
3592 that the dose tapering is proceeding according to protocol, to assess potential signs or  
3593 symptoms indicative of adrenal suppression, and to address any questions the  
3594 parent(s)/guardian(s) may have. In addition, subjects will be assessed promptly for  
3595 adrenal suppression if unwell at any time during the Dose-Tapering Period. There will be  
3596 a low threshold for recommending commencement of daily oral prednisone or  
3597 hydrocortisone, or intravenous hydrocortisone if hospitalization occurs in these  
3598 circumstances.

3599 The final end-of-study visit will be scheduled approximately one week after the final  
3600 dose de-escalation. Each subject will return to the study site for final study assessments  
3601 when he has received no suspension study medication for one week (Study Week 52).

3602 Subjects must have fasted  $\geq 6$  hours prior to arrival at the study site for the final Week 52  
3603 Dose-tapering Visit. Breakfast will be served at the study site after the blood and urine  
3604 collection for clinical laboratory tests and the blood draw for PD biomarkers, including  
3605 fasting glucose and insulin. At the final Week 52 Visit, subjects will also have a physical  
3606 examination with weight, assessment of cushingoid features and vital signs recorded.  
3607 Study medication will be returned for compliance monitoring. Adverse events, including  
3608 SAEs, and concomitant medications will be assessed. Subject diaries will be returned  
3609 and reviewed with site staff.

3610 Subjects participating in the Dose-tapering Period will be discharged from the study  
3611 following completion of all Dose-tapering Period assessments.

#### 3612 **6.4 Subject Discontinuation**

3613

3614 In the event that a subject withdraws early from the study prior to the Week 48 Visit, the  
3615 reason for discontinuation must be fully documented in the source documents and the  
3616 eCRF.

3617  
3618 Any subject who withdraws from the study prior to the Week 24 Visit should return to  
3619 the study site for Week 24 assessments and the Week 24 Follow-up Visit ACTH  
3620 Stimulation Test at the time of early withdrawal, whenever possible (see [Section 6.3.4](#));  
3621 any subject who prematurely discontinues from the study after Week 24 but prior to  
3622 Week 28 should complete the Week 28 assessments at the time of early withdrawal,  
3623 whenever possible (see [Section 6.3.5](#)); and any subject who prematurely discontinues  
3624 from the study after Week 28 but prior to Week 48 should complete the Week 48  
3625 assessments and the Week 48 Follow-up Visit ACTH Stimulation Test at the time of  
3626 early withdrawal, whenever possible (see [Section 6.3.6](#)), assuming the subject has not  
3627 withdrawn consent. Site personnel will document all assessments, including any AEs, in  
3628 the source documents and eCRF.

3629 In the event a subject withdraws informed consent, no further study procedures should be  
3630 performed and no additional data should be collected. Any data collected up to the point  
3631 of withdrawal of informed consent may be used by the Sponsor. Every effort will be  
3632 made to ensure that subjects who withdraw consent undergo dose-tapering, as  
3633 appropriate, prior to the date of withdrawal of consent. Subjects who withdraw early  
3634 from the study may be replaced, at the discretion of the Sponsor.

3635 Subjects who discontinue study medication should follow the procedures for the  
3636 applicable Early Discontinuation Dose-tapering Period described below and detailed in  
3637 the Manual of Operations, whenever possible. Dose tapering for subjects who  
3638 discontinue the study early is to aid in re-establishment of adrenal function if adrenal  
3639 suppression has occurred in the prednisone and/or vamorolone treated patients.

3640 Subjects will be assessed promptly if unwell during the tapering phase or in the weeks  
3641 following study medication cessation due to the risk of adrenal suppression. There will  
3642 be a low threshold for recommending commencement of daily oral prednisone or  
3643 hydrocortisone, or intravenous hydrocortisone if hospitalization occurs in these  
3644 circumstances.

3645

3646 The final end-of-study visit will be scheduled approximately one week after the final  
3647 dose de-escalation. Each subject will return to the study site for final study assessments  
3648 when he has received no suspension and/or tablet study medication for one week.

3649 Subjects must have fasted  $\geq 6$  hours prior to arrival at the study site for the final Early  
3650 Discontinuation Dose-tapering Visit. Breakfast will be served at the study site after the  
3651 blood and urine collection for clinical laboratory tests and the blood draw for PD  
3652 biomarkers, including fasting glucose and insulin. At the final Study Visit, subjects will  
3653 also have a physical examination with weight, assessment of cushingoid features and  
3654 vital signs recorded. Study medication will be returned for compliance monitoring.  
3655 Adverse events, including SAEs, and concomitant medications will be assessed. Subject  
3656 diaries will be returned and reviewed with site staff.

3657 **6.4.1 Early Discontinuation Prior to Week 24**

3658 Any subject who discontinues the study after Day 1 and prior to the Week 24 Visit should  
3659 return to the study site for Week 24 assessments and the Week 24 Follow-up ACTH  
3660 Stimulation Test at the time of early withdrawal, and will participate in a 4-week Early  
3661 Discontinuation Dose Tapering Period, whenever possible. Dose tapering will be  
3662 performed in a stepwise manner, according to the subject's most recently calculated  
3663 liquid and tablet formulation doses during the 24-week Treatment Period #1.  
3664

3665 Dose tapering for tablets (prednisone and matching placebo) will be performed as  
3666 outlined in [Table 14](#).

3667 **Table 14. Tablet Dose Tapering for Subjects Discontinuing Prior to Week 24**

| Treatment Period Dose<br>(No. tabs) | Week 25 Dose<br>(No. tabs) | Week 26 Dose<br>(No. tabs) | Week 27 Dose<br>(No. tabs) | Week 28 Dose<br>(No. tabs) |
|-------------------------------------|----------------------------|----------------------------|----------------------------|----------------------------|
| 2                                   | 1                          | 0                          |                            |                            |
| 3                                   | 2                          | 1                          | 0                          |                            |
| 4                                   | 3                          | 2                          | 1                          | 0                          |
| 5                                   | 3                          | 2                          | 1                          | 0                          |

3669 No. = number; tabs = tablets.

3670

3671 Dose tapering for the liquid formulation (vamorolone and matching placebo) will be  
3672 performed as outlined in [Table 15](#).

3673  
~~3674~~  
 3675

**Table 15. Suspension Dose Tapering for Subjects Discontinuing Prior to Week 24**

| Treatment Period Dose Level | Week 25 Dose Level | Week 26 Dose Level | Week 27 Dose Level | Week 28 Dose Level |
|-----------------------------|--------------------|--------------------|--------------------|--------------------|
| Formulation: 100%           | 50%                | 25%                | 10%                | 0%                 |

3676  
 3677  
 3678  
 3679

As soon as possible after ACTH Stimulation testing has been completed at the Week 24 Follow-up/Early Termination Visit, subjects will take the first doses of study medication in the Early Discontinuation Dose Tapering Period with a high-fat meal on the same day.

3680  
 3681  
 3682  
 3683  
 3684  
 3685

**6.4.2 Early Discontinuation After Week 24 and Prior to Week 28**

Subjects who discontinue from the study after Week 24 and prior to Week 28 will continue on the same schedule for dose tapering of tablets they are already following for Transition Period dosing, and will begin the 4-week suspension dose tapering schedule shown in [Table 16](#).

3686  
~~3687~~  
 3688

**Table 16. Suspension Dose-Tapering for Subjects Discontinuing After Week 24 and Prior to Week 28**

|                               | Formulation Dose Level (% of Volume Administered During Treatment Period #1) at Each Week Following Discontinuation |         |         |         |         |
|-------------------------------|---------------------------------------------------------------------------------------------------------------------|---------|---------|---------|---------|
| Time of Early Discontinuation | 100%                                                                                                                | 50%     | 25%     | 10%     | 0%      |
| Week 25                       | Week 25                                                                                                             | Week 26 | Week 27 | Week 28 | Week 29 |
| Week 26                       | Week 26                                                                                                             | Week 27 | Week 28 | Week 29 | Week 30 |
| Week 27                       | Week 27                                                                                                             | Week 28 | Week 29 | Week 30 | Week 31 |

3689  
 3690  
 3691  
 3692

Each subject will return to the study site for final study assessments when he has received no suspension or tablet study medication for one week (Study Week 29, Week 30, or Week 31, depending on when the subject discontinued [see [Table 16](#)]).

3693  
 3694  
 3695  
 3696  
 3697

**6.4.3 Early Discontinuation After Week 28 and Prior to Week 48**

Subjects who discontinue from the study after Week 28 and before the Week 48 Visit will follow the same schedule for dose tapering of suspension as described in [Section 6.3.7](#).



3698

3699

## **6.5 Subject and Study Completion**

3700

3701

A completed subject is defined as a subject who has completed Treatment Period #1 and Treatment Period #2, through the Week 48 and Week 48 Follow-up Visit assessments, and Dose-tapering Period, if applicable, and has not prematurely withdrawn from the study for any reason. The study will be completed when the final subject has completed his final study visit (“last subject, last visit”).

3705

3706

## **7 STUDY ASSESSMENTS AND MEASUREMENTS**

3707

3708

### **7.1 Demographic Assessments**

3709

3710

Demographic information (birth date, race, and ethnicity) will be collected during the Pretreatment Screening Period and will be recorded on the appropriate eCRF page.

3711

3712

3713

#### **7.1.1 Genetic Modifiers of DMD**

3714

3715

Approximately 6 mL of blood will be collected at the Week 24 Visit for DNA testing to determine if candidate genetic modifiers of DMD (gene polymorphisms associated with disease severity or response to glucocorticoid treatment) are similarly associated with vamorolone-treated DMD patients (baseline disease severity or response to vamorolone or prednisone treatment).

3716

3717

3718

3719

3720

DNA testing will be performed by a certified central laboratory.

3721

3722

The procedures for the collection, handling, and shipping of blood samples for DNA testing will be specified in the Laboratory Manual(s) provided to the clinical center.

3723

3724

3725

Results will be presented in an addendum report.

3726

3727

### **7.2 Safety and Tolerability Assessments**

3728

3729

#### **7.2.1 Medical History**

3730

3731

The medical history will be recorded at the Screening Visit and will include significant past medical or surgical procedures as well as previous and current co-existent diseases. It should include the date (month/year) the subject was diagnosed with DMD, initial symptoms of DMD and the age at which they were first identified, and any toxicities

3732

3733

3734

3735  
3736 or allergies to prior treatments. It should include relevant medical history for the  
3737 following body systems: head, eyes, ears, nose and throat (HEENT), respiratory,  
3738 cardiovascular, gastrointestinal, endocrine, hematological, dermatological, genital-  
3739 urinary, neurological, musculoskeletal, psychological/psychiatric, and any other history  
3740 of medical significance. The medical history will be recorded on the appropriate eCRF  
3741 page.

3742  
3743 **7.2.2 Physical Examination, Cushingoid Features, Weight, and Height**  
3744

3745 A complete physical examination will be performed at Screening, Baseline Day -1 and  
3746 every 6 weeks thereafter through Treatment Period #1, at the Week 28 Transition Period  
3747 Visit, at Weeks 34, 40, and 48 of Treatment Period #2, and at the final Week 52  
3748 Dose-tapering Period Visit, and will include examination of the following: head, eyes,  
3749 ears, nose, and throat, neck (*including an examination of the thyroid*), heart, lungs,  
3750 abdomen (*including an examination of the liver and spleen*), lymph nodes, extremities,  
3751 nervous system, and skin. Clinically significant changes from baseline should be  
3752 recorded as AEs. Particular attention will be paid in identifying any sign of cushingoid  
3753 features, which should also be recorded as AEs if they first appear or worsen during the  
3754 study.

3755 Additional unscheduled symptom-directed physical examinations may be conducted at  
3756 any time at the Investigator's discretion.

3757 Height (in cm) will be recorded at Screening, and Weeks 12, 24, 34, and 48. Weight  
3758 (in kg) will be recorded at Screening, Baseline Day -1, Week 2, Week 6, Week 12,  
3759 Week 18, Week 24, Week 28, Week 30, Week 34, Week 40, and Week 48, and at the  
3760 final Week 52 Dose-tapering Visit (**Table 11**). Weight recorded at the previous visit will  
3761 be used to calculate the study medication (suspension and tablets) dose for the subsequent  
3762 dispensing interval (see **Section 5.3**).

3763 Results will be recorded in the source documents and on the appropriate eCRF page.

3764

3765

### 7.2.3 *Vital Signs*

3766

3767

Vital signs (sitting blood pressure, heart rate, respiration rate, and body temperature) will be recorded at Screening, Baseline Day -1, Day 1, Week 2, Week 6, Week 12, Week 18, Week 24, Week 28, Week 30, Week 34, Week 40, and Week 48, and at the final Week 52 Dose-tapering Visit. Vital signs should be recorded after the subject has been resting for at least 5 minutes. Body temperature may be measured using oral, tympanic, or temporal recording devices; however, the same methodology must be used for all assessments of a given subject.

3774

Results will be recorded in the source documents and on the appropriate eCRF page.

3775

3776

If vital signs are recorded at the same study visit as blood sampling and ECG recording, at least 15 minutes should elapse after collection of blood samples and before performing ECG and recording vital signs.

3777

3778

3779

### 7.2.4 *Clinical Laboratory Tests*

3780

3781

Each subject will have blood drawn and urine collected for the hematology, chemistry, lipids, and urinalysis clinical laboratory tests listed in [Table 17](#) and [Table 18](#), below, during the Screening Period, at the Day 1 Visit, and at each of the subsequent study visits specified in [Table 11](#). Blood for vitamin D and HbA1c are collected at specific visits only ([Table 17](#)). Fasted blood and urine samples for clinical laboratory tests will be collected pre-dose at the Day 1 and Weeks 2, 12, 24, 28, 30, 40, and 48 Visits, and fasted samples will be collected at the final Week 52 Dose-tapering Period Visit. Non-fasted blood and urine samples for clinical laboratory tests will be collected at the Screening, and Weeks 6, 18, and 34 Visits. Details of blood draws can be found in the Laboratory Manual.

3782

3783

3784

3785

3786

3787

3788

3789

3790

3791

All blood and urine samples will be sent to the designated central laboratory for testing.

3792

3793

For the hematology, chemistry, and lipids laboratory tests, blood will be collected by direct venipuncture of peripheral veins. A total of approximately 140 mL of blood will be collected over the course of this study for clinical safety laboratory evaluation (see [Section 7.2.9](#) for details of blood volumes to be collected).

3794

3795

3796

3797

3798 If blood sampling is performed at the same study visit as vital signs assessment and ECG  
3799 recording, at least 15 minutes should elapse after collection of blood samples and before  
3800 performing ECG and recording vital signs.

3801 Any abnormal hematology, chemistry, lipid, or urinalysis test result deemed clinically  
3802 significant by the Investigator or medically qualified sub-investigator may be repeated,  
3803 including test results obtained on the final study day.

3804 Any treatment-emergent abnormal laboratory test result that is clinically significant, i.e.,  
3805 meeting one or more of the following conditions, should be recorded as a single diagnosis  
3806 on the AE section of the eCRF:

- 3807
- 3808 • Accompanied by clinical symptoms
  - 3809 • Requiring a change in concomitant therapy (e.g., addition of, interruption of,  
3810 discontinuation of, or any other change in a concomitant medication, therapy, or  
3811 treatment)
  - 3812 • Is otherwise considered clinically significant by the Investigator

3813 Any clinically significant test abnormality as defined above should be recorded as an AE  
3814 (unless it was considered spurious), and repeat analysis performed until resolution or  
3815 until the Investigator or medically qualified sub-investigator determines that resolution of  
3816 the abnormality is not expected.  
3817

3818  
 3819  
 3820

**Table 17. Hematology, Chemistry, and Lipids Clinical Laboratory Tests**

| <b>Hematology</b>                                                                                                                                                                                                             |                                                     |
|-------------------------------------------------------------------------------------------------------------------------------------------------------------------------------------------------------------------------------|-----------------------------------------------------|
| Red Blood Cells (RBC)                                                                                                                                                                                                         | Numerical platelet count (estimate not acceptable)  |
| Hemoglobin                                                                                                                                                                                                                    | White Blood Cells (WBC) with differential (percent) |
| Hematocrit                                                                                                                                                                                                                    |                                                     |
| <b>Chemistry</b>                                                                                                                                                                                                              |                                                     |
| Sodium                                                                                                                                                                                                                        | Total Bilirubin <sup>a</sup>                        |
| Potassium                                                                                                                                                                                                                     | Uric Acid                                           |
| Chloride                                                                                                                                                                                                                      | Glucose                                             |
| Calcium                                                                                                                                                                                                                       | Glutamate dehydrogenase (GLDH)                      |
| Inorganic Phosphorus                                                                                                                                                                                                          | Alkaline phosphatase (ALP)                          |
| Blood Urea Nitrogen (BUN)                                                                                                                                                                                                     | Gamma Glutamyl Transferase (GGT)                    |
| Creatinine                                                                                                                                                                                                                    | Aspartate aminotransferase (AST)                    |
| Total Protein                                                                                                                                                                                                                 | Alanine aminotransferase (ALT)                      |
| Albumin                                                                                                                                                                                                                       | Creatine kinase (CK)                                |
| Bicarbonate                                                                                                                                                                                                                   | Lipase                                              |
| Lactate Dehydrogenase (LDH)                                                                                                                                                                                                   | Amylase                                             |
| Cystatin C                                                                                                                                                                                                                    | Vitamin D <sup>b</sup>                              |
| HbA1c <sup>c</sup>                                                                                                                                                                                                            |                                                     |
| <b>Lipids</b>                                                                                                                                                                                                                 |                                                     |
| Triglycerides                                                                                                                                                                                                                 | Low Density Lipoprotein (LDL)                       |
| Total cholesterol                                                                                                                                                                                                             | High density Lipoprotein (HDL)                      |
| a. If outside normal range, direct bilirubin will be measured and reported.<br>b. Vitamin D levels measured at Screening, Weeks 12, 24, 40, and 48 only.<br>c. HbA1c levels measured at Screening, Week 24, and Week 48 only. |                                                     |

3821  
 3822  
 3823

Urine will be collected for routine analysis, by dipstick and microscopic analysis, for the tests described in [Table 18](#).

3824  
3825  
3826

**Table 18. Urinalysis Clinical Laboratory Tests**

| Urinalysis (including microscopic examination) |                      |
|------------------------------------------------|----------------------|
| Dipstick <sup>a</sup>                          | Microscopic Analysis |
| Protein                                        | WBC/hpf              |
| Glucose                                        | RBC/hpf              |
| Ketones                                        | Casts                |
| pH                                             | Bacteria             |
| Leukocyte esterase                             |                      |
| Blood                                          |                      |

a. A midstream clean-catch urine specimen will be collected for dipstick analysis.

3827  
3828  
3829  
3830  
3831

Blood for hemoglobin A1c (HbA1c) determination is collected at the scheduled Screening, Week 24 and Week 48 Visits, and should also be collected if urine glucose is positive and/or fasted glucose levels are above normal limits (see [Section 7.2.6](#) and Laboratory Manual).

3832  
3833  
3834

Clinical laboratory tests will be performed by a central laboratory; results will be reported to the study site and transferred electronically into the clinical study database.

3835  
3836

The procedures for the collection, handling, and shipping of laboratory samples will be specified in the Laboratory Manual provided to the clinical center.

3837  
3838

***Follow-up of Abnormal Laboratory Test Results***

3839  
3840  
3841  
3842  
3843  
3844  
3845  
3846  
3847  
3848

In the event of a medically significant, unexplained, or abnormal clinical laboratory test value, the test(s) may be repeated, evaluated by the Investigator for sustainability and reproducibility to determine if the abnormality represents an AE, and followed-up until the results have returned to the normal range, stabilized, and/or an adequate explanation for the abnormality is found. If a clear explanation is established, it should be recorded in the source documents and eCRF. The clinical laboratory will clearly mark all laboratory test values that are outside the normal range and the Investigator will indicate which of these deviations are clinically significant. These clinically significant deviating laboratory results will then be further described as AEs, and the relationship to the treatment, in the Investigator's opinion, will be indicated (see [Section 7.5](#)).

3849

3850 **7.2.5 *Chicken Pox Immunity***

3851

3852

3853

3854

3855

3856

3857

3858

3859

3860

Subjects must provide evidence of immunity to varicella zoster virus to be eligible for randomization to treatment. Evidence of immunity may be determined by either a positive anti-varicella IgG antibody test result obtained during the Screening Period, or documentation, provided at the Screening Visit, that the subject has had 2 doses of varicella vaccine, with or without serologic immunity, with the second of the 2 doses given at least 14 days prior to randomization. For subjects whose anti-varicella antibody titer will be measured at Screening, a 2 mL blood sample will be collected for antibodies (IgG) to Varicella Zoster virus to confirm immunity. The blood sample will be sent to the local laboratory for testing.

3861

3862

3863

3864

3865

3866

If antibodies are not detected in the blood sample sent to the local laboratory, and documentation of two previous vaccinations against varicella cannot be provided, immunization before starting the trial will be advised and the immunization status must be re-checked prior to randomization (see Manual of Operations for details). Lack of willingness to immunize a child who is not already immune to chicken pox will be a reason for exclusion of the child from the trial.

3867

3868

3869

3870

3871

**7.2.6 *Pharmacodynamic Biomarker Panel***

Blood samples will be collected to explore the effect of vamorolone on biomarkers associated with glucocorticoid safety concerns (secondary outcomes for adrenal suppression, insulin resistance, and bone turnover), as listed in [Table 19](#).

3872

3873

3874

3875

3876

3877

3878

3879

3880

Blood samples will be collected pre-dose at the Day 1 and Weeks 12, 24, 28, 40, and 48 Visits, and at the final Week 52 Dose-tapering Period Visit for analysis of biomarkers for secondary outcome measures of adrenal suppression, bone turnover, and insulin resistance. Approximately 2 mL of blood will be collected for the PD biomarker panel (osteocalcin, P1NP, and CTX bone turnover markers) at each scheduled collection time point; blood samples for analysis of morning cortisol levels (adrenal suppression biomarker) and fasting glucose and insulin (insulin resistance biomarkers) will be collected as part of the clinical laboratory tests and require no additional blood volume. All samples will be collected after the subject has fasted for  $\geq 6$  hours and prior to

3881  
3882 administration of the daily dose of study medication at dosing visits. Blood remaining  
3883 from collected samples not needed for protocol-specified analyses at each of these time  
3884 points may be stored for future exploratory biomarker studies for aspects of safety and  
3885 efficacy. These remaining blood samples may be released to scientists worldwide for  
3886 research purposes, including research on biomarkers in DMD. Any released samples will  
3887 have no identifying subject information.

3888 Blood for HbA1c determination should be collected if urine glucose is positive and/or  
3889 fasted glucose levels are above normal limits at any of the scheduled assessment time  
3890 points (see [Section 7.2.4](#) and Laboratory Manual).

3891 A total of approximately 14 mL of blood will be collected for the PD biomarker panel  
3892 (osteocalcin, P1NP, and CTX bone turnover markers) over the course of the 57-week  
3893 study (see [Section 7.2.9](#)).

3894 **Table 19. Pharmacodynamic Biomarkers – Secondary Safety Outcomes**

| <b>Adrenal Suppression</b> |
|----------------------------|
| Cortisol - morning         |
| <b>Insulin Resistance</b>  |
| Glucose – fasting          |
| Insulin - fasting          |
| <b>Bone Turnover</b>       |
| Osteocalcin                |
| CTX1                       |
| P1NP                       |

3896  
3897 **7.2.7 ACTH Stimulation Test**

3898  
3899 The ACTH Stimulation Test will be performed in the morning during the Screening Visit,  
3900 in the morning of the Week 24 Follow-up Visit ( $48 \pm 3$  hours after the final dose of  
3901 Treatment Period #1 study medication), and in the morning of the Week 48 Follow-up  
3902 Visit ( $48 \pm 3$  hours after the final dose of Treatment Period #2 study medication) to assess  
3903 the adrenal gland stress response.

3904 All subjects will be given a single dose of hydrocortisone (5 mg or 10 mg) 24 hours after  
3905 the dose of study medication at the Week 24 Visit and 24 hours after the dose of study  
3906 medication at the Week 48 Visit. The hydrocortisone dose will be approximately



3907

3908 8 mg/m<sup>2</sup>, rounded up to either 5 mg or 10 mg; subjects will be provided with either a  
3909 single 5 mg or 10 mg hydrocortisone tablet which will be dispensed by the site staff at the  
3910 Week 24 or Week 48 Visit (see Manual of Operations for details).

3911 Subjects will return to the study site approximately 48 hours after administration of the  
3912 final (Week 24) dose of Treatment Period #1 study medication (and approximately  
3913 24 hours after the dose of oral hydrocortisone), and approximately 48 hours after  
3914 administration of the final (Week 48) dose of Treatment Period #2 study medication (and  
3915 approximately 24 hours after the dose of oral hydrocortisone) for ACTH Stimulation  
3916 testing. The ACTH Stimulation Test will be initiated as close to 8 AM local time as  
3917 possible, but in any case completed in the morning, before 12 noon local time, 48 ± 3  
3918 hours after administration of the final Treatment Period #1 or Treatment Period #2 dose  
3919 of study medication, and prior to administration of the first dose of study drug in the  
3920 Transition Period (Week 24) or Dose-Tapering Period (Week 48) (see Manual of  
3921 Operations for details).

3922 The ACTH Stimulation Test involves insertion of a saline lock and then administration of  
3923 250 µg of Cosyntropin at time zero. Blood samples for cortisol measurement are  
3924 collected at time 0 immediately prior to Cosyntropin administration, and at 30 ± 5  
3925 minutes and 60 ± 5 minutes after Cosyntropin administration.

3926 The potential side effects of ACTH Stimulation testing (nausea, sweating, dizziness,  
3927 palpitations, facial flushing) will be discussed with the subject and the family before  
3928 starting the test. Cortisol levels below 18 µg/dL (equivalent to 500 nM) 30 or 60 minutes  
3929 after stimulation with Cosyntropin will be considered indicative of adrenal suppression.

3930 Approximately 2 mL of blood will be collected at each time point for cortisol  
3931 measurement; a total of approximately 6 mL of blood will be collected during each of the  
3932 Screening Visit, the Week 24 Follow-up Visit (48 ± 3 hours following the final dose of  
3933 Treatment Period #1 study medication), and the Week 48 Follow-up Visit (48 ± 3 hours  
3934 following the final dose of Treatment Period #2 study medication) for the ACTH  
3935 Stimulation Test (see [Section 7.2.9](#)).

3936  
3937 Blood samples will be sent to a central laboratory, and results centrally interpreted  
3938 (Children's Hospital of Eastern Ontario). Results of the Week 24 analysis will not be  
3939 reported to the study sites.

3940 **7.2.8 Population PK Assessment**

3941  
3942 At the Week 30 Visit, all subjects will have blood collected for PK assessments at  
3943 2 hours post-dose. Approximately 2 mL of blood will be collected into K<sub>2</sub>-EDTA tubes  
3944 at the single assessment time point.

3945  
3946 Plasma concentrations of vamorolone will be measured using a specific and validated  
3947 liquid chromatography tandem mass spectrometry assay. PK assessments will be  
3948 performed by a central laboratory. The procedures for the collection, handling, and  
3949 shipping of laboratory samples will be specified in the Laboratory Manual(s) provided to  
3950 the study sites.

3951  
3952 The exact time of blood sampling will be recorded in the source document and eCRF.

3953  
3954 If PK and PD or clinical laboratory blood samples are to be collected at the same time  
3955 point, the PK blood sample should be collected prior to the PD blood sample(s), which in  
3956 turn should be collected prior to the clinical laboratory blood samples.

3957 **7.2.9 Total Blood Volume Required**

3958  
3959 The number and volume of blood samples and total volume of blood to be collected from  
3960 each subject throughout the duration of the 57-week study are summarized in **Table 20**.

3961 A total of 182 mL of blood will be collected from each subject over the course of the  
3962 up-to-57-week study.

3963  
3964  
3965  
3966  
3967  
3968

3969

**Table 20. Blood Sample Number and Volume by Study Visit**

| Test                                                                                                                                                                                                                                                                                                                                                                                                                        | Total mL of Blood |                                 |                 |        |                                 |         |                                 |             |                                 |                 |         |                                 |                                 |             |                                 | Total Volume     |
|-----------------------------------------------------------------------------------------------------------------------------------------------------------------------------------------------------------------------------------------------------------------------------------------------------------------------------------------------------------------------------------------------------------------------------|-------------------|---------------------------------|-----------------|--------|---------------------------------|---------|---------------------------------|-------------|---------------------------------|-----------------|---------|---------------------------------|---------------------------------|-------------|---------------------------------|------------------|
|                                                                                                                                                                                                                                                                                                                                                                                                                             | SCR               | Day 1                           | Week 2          | Week 6 | Week 12                         | Week 18 | Week 24                         | Week 24 F/U | Week 28                         | Week 30         | Week 34 | Week 40                         | Week 48                         | Week 48 F/U | Week 52                         |                  |
| Clinical Safety Labs <sup>a</sup>                                                                                                                                                                                                                                                                                                                                                                                           | 12 <sup>b</sup>   | 10 <sup>c</sup>                 | 10 <sup>c</sup> | 10     | 12 <sup>c</sup>                 | 10      | 12 <sup>b,c</sup>               |             | 10 <sup>c</sup>                 | 10 <sup>c</sup> | 10      | 12 <sup>c</sup>                 | 12 <sup>b,c</sup>               |             | 10 <sup>c</sup>                 | 140 <sup>b</sup> |
| Varicella Zoster IgG                                                                                                                                                                                                                                                                                                                                                                                                        | 2                 |                                 |                 |        |                                 |         |                                 |             |                                 |                 |         |                                 |                                 |             |                                 | 2                |
| PD Biomarker Panel <sup>d</sup>                                                                                                                                                                                                                                                                                                                                                                                             |                   | 2                               |                 |        | 2                               |         | 2                               |             | 2                               |                 |         | 2                               | 2                               |             | 2                               | 14               |
| PD Insulin/Glucose <sup>e</sup>                                                                                                                                                                                                                                                                                                                                                                                             |                   | From Clinical Safety Lab Sample |                 |        | From Clinical Safety Lab Sample |         | From Clinical Safety Lab Sample |             | From Clinical Safety Lab Sample |                 |         | From Clinical Safety Lab Sample | From Clinical Safety Lab Sample |             | From Clinical Safety Lab Sample |                  |
| DNA Testing                                                                                                                                                                                                                                                                                                                                                                                                                 |                   |                                 |                 |        |                                 |         | 6                               |             |                                 |                 |         |                                 |                                 |             |                                 | 6                |
| ACTH Stimulation Test <sup>e</sup>                                                                                                                                                                                                                                                                                                                                                                                          | 6                 |                                 |                 |        |                                 |         |                                 | 6           |                                 |                 |         |                                 |                                 | 6           |                                 | 18               |
| PK <sup>f</sup>                                                                                                                                                                                                                                                                                                                                                                                                             |                   |                                 |                 |        |                                 |         |                                 |             |                                 | 2               |         |                                 |                                 |             |                                 | 2                |
| Total Volume by Visit (mL)                                                                                                                                                                                                                                                                                                                                                                                                  | 20                | 12                              | 10              | 10     | 14                              | 10      | 20                              | 6           | 12                              | 12              | 10      | 14                              | 14                              | 6           | 12                              | 182              |
| <b>Total Volume: 182 mL</b>                                                                                                                                                                                                                                                                                                                                                                                                 |                   |                                 |                 |        |                                 |         |                                 |             |                                 |                 |         |                                 |                                 |             |                                 |                  |
| F/U = Follow-up; SCR = Screening                                                                                                                                                                                                                                                                                                                                                                                            |                   |                                 |                 |        |                                 |         |                                 |             |                                 |                 |         |                                 |                                 |             |                                 |                  |
| <sup>a</sup> Hematology, Chemistry, Lipids; GLDH; volume includes blood for vitamin D testing, fasting insulin and glucose, cortisol, and exploratory PD biomarkers, where applicable.                                                                                                                                                                                                                                      |                   |                                 |                 |        |                                 |         |                                 |             |                                 |                 |         |                                 |                                 |             |                                 |                  |
| <sup>b</sup> Includes blood for HbA1c testing.                                                                                                                                                                                                                                                                                                                                                                              |                   |                                 |                 |        |                                 |         |                                 |             |                                 |                 |         |                                 |                                 |             |                                 |                  |
| <sup>c</sup> Subjects must have fasted $\geq 6$ hours prior to blood draws.                                                                                                                                                                                                                                                                                                                                                 |                   |                                 |                 |        |                                 |         |                                 |             |                                 |                 |         |                                 |                                 |             |                                 |                  |
| <sup>d</sup> Osteocalcin, CTX1, P1NP, pre-dose on dosing days; subjects must have fasted $\geq 6$ hours prior to pre-dose and Week 52 blood draws.                                                                                                                                                                                                                                                                          |                   |                                 |                 |        |                                 |         |                                 |             |                                 |                 |         |                                 |                                 |             |                                 |                  |
| <sup>e</sup> ACTH Stimulation Test performed at Screening, Week 24 Follow-up Visit, 48 $\pm$ 3 hours after the final dose of Treatment Period #1 study medication and prior to first dose of study medication in the Transition Period, and Week 48 Follow-up Visit, 48 $\pm$ 3 hours after the final dose of Treatment Period #2 study medication and prior to first dose of study medication in the Dose-Tapering Period. |                   |                                 |                 |        |                                 |         |                                 |             |                                 |                 |         |                                 |                                 |             |                                 |                  |
| <sup>f</sup> Blood drawn for population PK at 2 hours post-dose at the Week 30 Visit.                                                                                                                                                                                                                                                                                                                                       |                   |                                 |                 |        |                                 |         |                                 |             |                                 |                 |         |                                 |                                 |             |                                 |                  |

3971  
3972  
3973  
3974  
3975  
3976  
3977

978  
979 **7.2.10 12-Lead ECG**

980 12-lead ECGs will be recorded at the Screening, Week 12, Week 24, Week 40, and  
981 Week 48 Visits. All ECG recordings must be performed using a standard high-quality,  
982 high-fidelity machine equipped with computer-based interval measurements. Digital  
983 ECG recording is recommended. Automated ECG intervals (QRS duration, PR [PQ]  
984 interval, RR interval [interbeat interval], QT interval, QTc, and heart rate) will be  
985 captured or calculated.  
986

987 12-lead ECGs will be obtained over a 3- to 5-minute period after the subject has been  
988 resting quietly in a supine position for at least 5 minutes.

989 If blood sampling, vital signs assessment, and ECG recordings are scheduled at the same  
990 study visits, at least 15 minutes should elapse between collection of blood samples and  
991 before performing ECG and recording vital signs.

992 ECG results will be read locally. Results must be interpreted and recorded on the  
993 appropriate eCRF page.

994 **7.2.11 2D-echocardiography**

995 Standard trans-thoracic echocardiogram will be performed at Screening, Week 24, and  
996 Week 48 to assess cardiac status. The echocardiograms must be manually reviewed and  
997 interpreted locally by medically qualified personnel. No central reading of  
998 echocardiography results is planned. The findings will be categorized as: normal;  
999 abnormal but not clinically significant; abnormal and clinically significant. An  
000 echocardiogram result that is abnormal and clinically significant will be recorded in  
001 medical history if detected during the Screening Period and will be considered as an AE  
002 if detected after the first dose of study medication. Adequate management should be  
003 initiated if any abnormalities of clinical significance are detected.  
004

005 Echocardiographic parameters to be recorded will be described in the Manual of  
006 Operations. Results must be interpreted and recorded on the appropriate eCRF page.

### 7.2.12 *Eye Examination*

An eye examination will be performed by a certified and appropriately trained optometrist or ophthalmologist at Screening, Week 24, and Week 48 to assess for presence and degree of cataracts and glaucoma. Number and severity of cataracts, if present, will be recorded. Ocular pressure and presence/absence of glaucoma will be recorded.

Results must be interpreted and recorded in the source document and on the appropriate eCRF page.

### 7.2.13 *Bone Health and DXA Scan (total body and spine)*

Data on bone mass, density, and total body composition (fat mass, fat-free mass, lean mass, Lean Mass Index, and Fat Mass Index) will be collected by DXA during the Screening Period (depending on local facilities, this may require an additional visit but should be completed prior to starting study medication), and at Week 24 and Week 48.

Antero-posterior spine (L1-L4) and total body (without head) bone mineral density (BMD) by DXA scan will be collected. DXA quality control will be performed as described in the Manual of Operations. DXA scans will be analyzed centrally by a certified medical radiation technologist at Children's Hospital of Ottawa in Ottawa, Canada. The Screening result will represent a baseline assessment for long-term follow up. Additional DXA scanning may be arranged if clinically indicated throughout the study.

Vitamin D deficiency and insufficiency will be treated with Vitamin D supplements (see [Section 5.7.6](#)).

Vertebral and non-vertebral fractures will be assessed and recorded at Screening, Week 24, and Week 48 using a Fracture Questionnaire. Fractures will be recorded as medical history if reported during the Screening Period and as AEs if detected following the first dose of study medication and confirmed by radiologic investigation. The Fracture Questionnaires completed at the Weeks 24 and 48 Visits will document all

radiographically confirmed fractures which occurred during the course of the study, following the first dose of study medication.

#### **7.2.14 Spine X-rays**

Data on bone health will also be collected by lateral spine X-ray (T4-L5) during the Screening Period (depending on local facilities, this may require an additional visit but should be completed prior to starting study medication) and at the Week 24 Visit. Lateral spine X-ray will be analyzed centrally by two certified pediatric radiologists at Children's Hospital of Ottawa in Ottawa, Canada, who are blinded to the results of one another; a third radiologist will resolve any discrepancies arising from the first two readings. Quantification of any vertebral fractures detected will be performed. The Screening result will represent a baseline assessment for long-term follow up. Additional spine X-rays may be arranged if clinically indicated throughout the study.

Spine x-ray data will be analyzed in an addendum report.

Fractures will be recorded as medical history if detected during the Screening Period and as AEs if detected following the first dose of study medication.

### **7.3 Assessment of Muscle Strength and Function**

Muscle strength and function assessments should be performed in the morning and at approximately the same time of day, whenever possible.

#### **7.3.1 Time to Stand Test (TTSTAND)**

The Time to Stand Test (TTSTAND) will be assessed at the Screening, Baseline Day -1, Week 6, Week 12, Week 24, Week 34, Week 40 and Week 48 Visits.

The TTSTAND measures the time (in seconds) required for the subject to stand to an erect position from a supine position (floor), and is assessed as part of the NSAA (see [Section 7.3.4](#)). Complete instructions for administering and scoring the TTSTAND are given in the Clinical Evaluator Manual to be supplied to the sites prior to study start.

Results will be recorded in the source documents and in the eCRF.

069  
070 **7.3.2 Time to Climb Test (TTCLIMB)**  
071

072 The Time to Climb Test (TTCLIMB) will be assessed at Screening, Baseline Day -1,  
073 Week 12, Week 24, Week 40, and Week 48 Visits.

074 The TTCLIMB measures the time (in seconds) required for the subject to climb  
075 4 standard stairs, beginning and ending in a standing position with arms at the sides.<sup>35</sup>

076 Complete instructions for administering the TTCLIMB are given in the Clinical  
077 Evaluator Manual to be supplied to the sites prior to study start.

078 Results will be recorded in the source documents and in the eCRF.  
079

080 **7.3.3 Time to Run/Walk Test (TTRW)**  
081

082 The Time to Run/Walk Test (TTRW) will be assessed at Screening, Baseline Day -1,  
083 Week 12, Week 24, Week 40, and Week 48 Visits.

084 The TTRW measures the time (in seconds) that it takes a subject to run or walk 10 meters  
085 and is assessed as part of the NSAA (see [Section 7.3.4](#)). Complete instructions for  
086 administering and scoring the TTRW are given in the Clinical Evaluator Manual to be  
087 supplied to sites prior to study start.

088 Results will be recorded in the source documents and in the eCRF.  
089

090 **7.3.4 North Star Ambulatory Assessment (NSAA)**  
091

092 The North Star Ambulatory Assessment (NSAA) is a clinical assessment scale  
093 specifically designed to measure functional ability in ambulant boys with DMD.<sup>36</sup> The  
094 NSAA consists of 17 scored items and 2 timed tests, including the TTRW and the  
095 TTSTAND (see [Section 7.3.1](#)). The NSAA will be conducted at Screening, Baseline  
096 Day -1, Week 12, Week 24, Week 40, and Week 48 Visits.

097 Subjects should be barefoot and wear comfortable clothing. Complete instructions for  
098 administering and scoring the NSAA are given in the Clinical Evaluator Manual to be  
099 supplied to the sites prior to study start.

100 The NSAA should be assessed BEFORE the 6MWT at study visits where both tests are  
101 performed.

Results will be recorded in the source documents and in the eCRF.

### **7.3.5 Six-minute Walk Test (6MWT)**

Functional exercise capacity and mobility will be assessed in all subjects by means of the Six-minute Walk Test (6MWT) at Screening, Baseline Day -1, Week 12, Week 24, Week 40, and Week 48 Visits. This evaluation is a modified version of the 6MWT, adapted for use in DMD patients.<sup>37</sup>

The total distance traveled, in meters, should be recorded along with the validity of the test as assessed by the test administrator in the source documents and in the eCRF. If a subject cannot complete 6 minutes of walking, the total meters and the time until discontinuation of the test should be recorded. Subjects should wear comfortable shoes (trainers) and clothing. Complete instructions for administering the 6MWT are given in the Clinical Evaluator Manual to be supplied to the sites prior to study start.

The 6MWT should be assessed AFTER the NSAA at study visits where both tests are performed.

Results will be recorded in the source documents and in the eCRF.

### **7.3.6 Hand-Held Myometry (elbow flexors and knee extensors)**

Muscle strength will be measured with hand-held myometry. Elbow flexor muscles will be measured in the upper limbs and quadriceps muscle will be used for the lower limbs. Measurements will be performed unilaterally on the elbow and knee muscles, on the same side as the dominant hand (see Clinical Evaluator Manual for details). Muscle strength will be measured at Screening, Baseline Day -1, Week 12, Week 24, Week 40, and Week 48 Visits.

Results will be recorded in the source documents and eCRF.

### **7.3.7 Range of Motion (ROM)**

Range of motion (ROM) at the ankle joint will be measured using a standard goniometer at the Screening, Baseline Day -1, Week 12, Week 24, Week 40, and Week 48 Visits. Measurements will be performed on both the right and left ankle joints.



136  
137 Training will be given to study staff and specific detailed instructions are included in the  
138 Clinical Evaluator Manual.

139 Results will be recorded in the source documents and eCRF.

#### 140 **7.4 Patient-Reported Outcome Measures**

##### 141 **7.4.1 Pediatric Outcomes Data Collection Instrument (PODCI)**

142  
143 Physical functioning will be assessed by completion of the Pediatric Outcomes Data  
144 Collection Instrument (PODCI). The subject parent/legal guardians will be asked to  
145 complete this instrument at the Screening, Week 24, and Week 48 Visits.

146  
147 The completed Instrument is considered the source documentation for this assessment.  
148 Results will be recorded in the eCRF.

##### 149 **7.4.2 Treatment Satisfaction Questionnaire (TSQM)**

150  
151 Satisfaction with treatment will be measured at the Week 24 and Week 48 Visits using  
152 the Treatment Satisfaction Questionnaire for Medication (TSQM). The TSQM consists  
153 of 14 Likert-scale items that yield four subscale scores: Effectiveness, Side Effects,  
154 Convenience, and Global Satisfaction (the latter being a component of the primary  
155 outcome variable for the proposed trial). A child-report version of the TSQM is not  
156 available. Therefore, the parent (s)/guardian(s) will be asked to report from their  
157 perspective of the boy's treatment. TSQM is available in all primary languages spoken at  
158 sites for this study.

159  
160 The completed Questionnaire is considered the source documentation for this assessment.  
161 Results will be recorded in the eCRF.

##### 162 **7.4.3 Behavioral Assessment**

163  
164 One instrument, for completion by the parent(s)/guardian(s), will be used for behavior  
165 assessment screening and evaluation of behavior change. This is the PARS III, a scale  
166 designed to measure psychosocial adjustment of children with chronic physical illnesses.  
167 The instrument will be completed by the parent(s)/guardian(s) at the Screening Visit and

at the Weeks 12, 24, and 48 Visits. The PARS III is available in all primary languages spoken at sites for this study.

The completed assessment is considered the source documentation. Results will be recorded in the eCRF.

#### **7.4.4 Ease of Study Medication Administration Assessment**

Ease of administration of the suspension study medication will be assessed by the parent(s)/guardian(s) at the Weeks 2, 12, 24, 30, 40, and 48 Visits. Results will be recorded in the source documents and eCRF.

#### **7.4.5 Blindedness Assessment**

The subject's parent(s)/guardian(s), the site Principal Investigator, and the Clinical Evaluator will each complete a Blindedness Assessment at the Week 24 Visit. This is a brief questionnaire which asks each evaluator to predict the identity of the study medication (vamorolone, prednisone, or placebo) the subject was taking during Treatment Period #1, and to rate on a 4-point scale his/her level of certainty and the reason for the chosen level of certainty.

Results will be recorded in the source documents and in the eCRF.

#### **7.4.6 Subject Diary**

The parent or legal guardian of each subject will be given a subject diary at the Day 1 Visit in which to record any new concomitant medications and any changes to existing concomitant medications taken during the study, any AEs experienced by the subject during the study, and any missed or incomplete doses of study medication. Parents/legal guardians will be instructed in how to record information in the diary and will be instructed to bring the diary with them to each study visit for review by study staff for completeness and accuracy. A new diary will be dispensed at each visit for use through the time of the next scheduled visit. Collection of final diaries will occur at the Week 52 Visit, at the end of the Dose-tapering Period.

## 7.5 Adverse Events and Serious Adverse Events

The condition of the subjects will be monitored throughout the duration of the study by the clinical site study team and by recording of AEs in subject diaries. An AE is any untoward medical occurrence in a subject which does not necessarily have to have a causal relationship with the intervention. An AE can therefore be any unfavorable and unintended sign (including an abnormal laboratory finding, for example), symptom, or disease temporally associated with the use of an investigational product, whether or not considered related to the drug. Pre-existing conditions that worsen during a study are to be reported as AEs. Signs and symptoms of DMD should not be recorded as AEs, unless their nature or severity is unexpected for the course of the disease.

The Investigator is responsible for reporting AEs and SAEs to the Sponsor or designee. For reported death of a participant, the Investigator shall supply the Sponsor and the IRB/IEC with any additional information requested.

Adverse events will be recorded from the date of informed consent and through the time of the subject's last study visit (study completion or early discontinuation). Serious adverse events will be recorded from the date of informed consent, throughout the clinical trial, and for up to 30 days after the final administration of study drug. In addition, subjects (and their parent or legal guardian) will be questioned by study staff at each study visit for any new signs or symptoms or changes in existing signs or symptoms.

All AEs and SAEs that are spontaneously reported, identified during questioning, or are apparent from a participant's physical appearance, will be recorded in the source documents and in the subject's eCRF. The date of onset will be recorded. Any laboratory abnormality that is outside the normal range and is considered an AE (see [Section 7.2.4](#)) should be recorded as an AE on the appropriate eCRF page. The details recorded shall include the nature, date of onset, final outcome and its date, intensity assessment (Common Terminology Criteria for Adverse Events [CTCAE] grade), and a determination of the relationship of the event to administration of the study drug (i.e., causality). All AEs will be graded by CTCAE, Version 4.03. Details of any medications given to the subject to abate the AE should be recorded on the appropriate eCRF page.

### 7.5.1 Intensity

All clinical AEs encountered during the clinical study will be recorded in the eCRF. Intensity of AEs will be graded using the most current version of the CTCAE, version 4.03, 5-point scale, and reported in detail as indicated in the eCRF. A description of the intensity scales can be found below:

Mild (Grade 1): Asymptomatic or mild symptoms: clinical or diagnostic observations only; intervention not indicated.

Moderate (Grade 2): Minimal, local, or noninvasive intervention indicated; limiting age-appropriate instrumental activities of daily living (ADL).

Severe (Grade 3): Severe or medically significant but not immediately life-threatening; hospitalization or prolongation of hospitalization indicated; disabling; limiting self-care ADL; incapacitating with inability to work or perform normal daily activity.

Life-Threatening (Grade 4): Urgent intervention indicated.

Death (Grade 5): Death related to AE.

### 7.5.2 Relationship

Relationship to study drug will be graded on a 5-point scale (definite, probable, possible, remote, or unrelated). A description of the relationship scale can be found below:

Definite: This category applies to an AE that meets at least criteria 1, 2, and 4 of the “Probable” category.

Probable: This category applies to those AEs that are considered, with a high degree of certainty, to be related to the study drug. An AE may be considered probable, if (must include first 3):

1. It follows a reasonable temporal sequence from administration of the study drug.

- 261  
262 2. It cannot be reasonably explained by the known characteristics of the  
263 subject's clinical state, environmental or toxic factors, or other modes of  
264 therapy administered to the subject.
- 265 3. It disappears or decreases after dosing is complete. (There are important  
266 exceptions when an AE does not disappear upon discontinuation of study  
267 drug, yet drug relatedness clearly exists, e.g., [1] bone marrow depression  
268 and [2] tardive dyskinesia.)
- 269 4. It follows a known pattern of response to the suspected study drug.

270  
271 Possible: This category applies to those AEs for which the connection with study  
272 drug administration appears unlikely but cannot be ruled out with certainty. An AE  
273 may be considered possibly related to study drug if or when (must include first 2):

- 274 1. It follows a reasonable temporal sequence from administration of the study  
275 drug.
- 276 2. It may have been produced by the subject's clinical state, environmental or  
277 toxic factors, or other modes of therapy administered to the subject.
- 278 3. It follows a known pattern of response to the suspected study drug.

279  
280 Remote: In general, this category is applicable to an AE that meets the following  
281 criteria (must include the first 2):

- 282 1. It does not follow a reasonable temporal sequence from administration of  
283 the study drug.
- 284 2. It may readily have been produced by the subject's clinical state,  
285 environmental or toxic factors, or other modes of therapy administered to  
286 the subject.
- 287 3. It does not follow a known pattern of response to the suspected study drug.

288  
289 Unrelated: This category is applicable to those AEs which are judged to be clearly  
290 and incontrovertibly due only to extraneous causes (disease, environment, etc.) and

do not meet the criteria for study drug relationship listed under remote, possible, or probable.

### 7.5.3 *Clinical Laboratory Test Abnormalities*

Clinical laboratory test results will be recorded on the designated eCRF page. The intensity of abnormal clinical laboratory test results that are AEs will also be graded using the most current version of the CTCAE, version 4.03, 5-point scale and reported in detail as indicated in the eCRF. A description of the intensity scale can be found above.

Any treatment-emergent abnormal clinical laboratory test result that is clinically significant, i.e., meeting one or more of the following conditions, should be recorded as a single diagnosis on the AE section of the eCRF:

- Accompanied by clinical symptoms
- Requiring a change in concomitant therapy (e.g., addition of, interruption of, discontinuation of, or any other change in a concomitant medication, therapy, or treatment)
- Is otherwise considered clinically significant by the Investigator

**This applies to** any protocol and non-protocol-specified safety laboratory result from tests performed after the first dose of study drug, which falls outside the laboratory reference range and meets the clinical significance criteria per Investigator standard operating procedures (SOPs).

**This does not apply to** any abnormal laboratory result that falls outside the laboratory reference range, but does not meet the clinical significance criteria (which will be analyzed and reported as laboratory abnormalities); those that are considered AEs of the type explicitly exempted by the protocol; or those that are the result of an AE which has already been reported.

**Please Note:** any clinical laboratory abnormality fulfilling the criteria for an SAE should be reported as such, in addition to being recorded as an AE in the eCRF.

#### 7.5.4 *Follow-Up of Adverse Events*

Adverse events will be followed until they have returned to baseline status, stabilized, or the Investigator, Study Chair, Medical Monitor and Sponsor agree that follow-up is no longer needed. If a clear explanation of cause is established, it should be recorded in the source documents and eCRF. In the event of unexplained abnormal laboratory test values, the tests may be repeated as soon as possible and followed up until they have returned to the normal range or baseline value and/or an adequate explanation of the abnormality is found. In case of ongoing AEs at the time of database closure, the data obtained at the time of database closure will be used in the statistical analysis. The further follow-up of AEs will be documented in the source documents and will be described in the final report only if considered relevant by the Investigator, the Study Chair, the Medical Monitor and/or the Sponsor.

In addition, the Medical Monitor may request additional blood tests, diagnostic imaging studies, or specialist physician consultations in order to further evaluate any AE or test abnormality considered to be clinically significant by the Study Sponsor.

#### 7.5.5 *Dosing Error*

For the purposes of this study, a dosing error is defined as a dose exceeding or less than the scheduled dose of liquid formulation, tablet formulation, or both. Such occurrences will be reported and recorded in the dosing page of the eCRF and as follows:

- Use of study medication in doses in excess of that specified in the protocol will not be recorded as an AE unless there are associated signs or symptoms.
- A dosing error with associated non-serious AEs will be recorded as AEs on the relevant AE forms in the eCRF.
- A dosing error with an associated SAE will be recorded as an SAE.
- Details of all dosing errors, including actual dose administered, will be documented in the source documents and recorded in the appropriate documentation.

### 7.5.6 *Serious Adverse Events*

Serious adverse events will be collected and reported during the study from the time informed consent is obtained through 30 days after the final dose of study medication, according to the protocol and applicable regulations. For subjects who do not continue into an additional vamorolone study or general access program, site staff will make a phone call to the home 31-35 days after the final dose of study medication in the VBP15-004 Dose-tapering Period to confirm the final SAE status of the subject.

All SAEs, including those that continue beyond the normal AE collection period (i.e., are ongoing at the subject's last study visit), will be followed until resolution or until stabilized without sequelae. All SAEs, both related and unrelated, that begin within 30 days after the subject's final dose of study medication will be reported to the Sponsor within 24 hours of discovery by the Investigator.

During the SAE collection period, the Investigator or clinical site personnel should notify the Coordinating Center of all SAEs, regardless of relationship to the investigational drug, within 24 hours of clinical staff becoming aware of the event; notification to the Coordinating Center will trigger alerts to the Study Chair, the Sponsor, and the Medical Monitor. The Investigator will provide the initial notification by completing the SAE Report Form in the electronic data capture (EDC) system, which must include the Investigator's assessment of the relationship of the event to investigational drug, and must be signed by the Investigator.

In addition, notification is sent by the Investigator to the IRB/IEC and the subject's Primary Care Physician.

Follow-up information, or new information regarding an ongoing SAE, must be provided promptly to the Coordinating Center within 24 hours of knowledge of the new or follow-up information, which will forward the information to the Study Chair, the Sponsor, and the Medical Monitor.

All SAE reports should be completed within the EDC.



An AE or suspected adverse reaction is considered serious if, in the view of either the Investigator or Sponsor, it results in any of the following outcomes:

- Is fatal (results in the outcome of death)
- Is life-threatening
- Requires in-patient hospitalization or prolongation of existing hospitalization
- Results in persistent or significant incapacity or substantial disruption of the ability to conduct normal life functions
- Is a congenital anomaly or birth defect
- Is an important medical event that may jeopardize the subject and may require medical or surgical intervention to prevent one of the outcomes listed above.

The terms death and sudden death are clearly distinct and must not be used interchangeably.

Hospital admissions scheduled prior to the study are not considered SAEs unless the hospitalization is prolonged due to an adverse event. Planned admissions as part of the study, hospitalizations for scheduled treatment of a preexisting condition that has not worsened, and hospitalization for an elective procedure are not considered SAEs. Hospitalizations for fewer than 24 hours and emergency room/department visits are not considered SAEs.

Any AE or clinically significant abnormal laboratory test value, as determined by the Investigator, that is serious and which occurs during the course of the study (as defined above) must be reported to the Coordinating Center, who will notify the Study Chair, the Sponsor and the Medical Monitor within 24 hours of the Investigator becoming aware of the event. Additional information that becomes available for an SAE after the initial report is submitted will be reported to the Coordinating Center, who will notify the Study Chair, the Sponsor and the Medical Monitor within 24 hours of the Investigator becoming aware of the new information.

All SAEs must be collected and reported during the study from the time of informed consent through 30 days after the final dose of study medication. All SAEs, related and unrelated, must be reported to the Sponsor within 24 hours of first awareness.

If, at any time during the study, a subject experiences an SAE, appropriate care should be instituted.

**In the event of a serious adverse event (SAE), the Investigator will complete the SAE electronic case report form within 24 hours of first awareness of the event. In the unlikely event that the electronic study database is inaccessible and the Investigator is unable to complete the SAE electronic case report form within 24 hours, the SAE Notification Form (pdf) should be completed and emailed or printed/faxed to the PRA safety management team within 24 hours, using the contact information below:**

**In United States and Canada:**

**Email: CHOSafety@prahs.com**

**Drug Safety Fax: 1 888 772 6919 or 1 434 951 3482**

**SAE Questions: Drug Safety Helpline: 1 800 772 2215**

**In Europe, Asia, Pacific, Africa and Australia:**

**Email: MHGSafety@prahs.com**

**Drug Safety Fax: +44 1792 525720**

**SAE Questions: Drug Safety Helpline: +49 621 878 2154**

Serious Adverse Events will be recorded from the time the subject's written informed consent is obtained. Serious adverse events that occur within 30 days of study drug dosing must continue to be recorded and reported to the Study Sponsor or its designee. Should there be an SAE that occurs that suggests an increased risk to the participants, the following steps will be considered, depending on the number and severity of the SAE(s): modification of the protocol, investigation of the relationship of the SAE(s) to study drug, suspension of the study, and/or discontinuation of the study.

## Suspected Unexpected Serious Adverse Reaction (SUSAR) Identification and Reporting

A Suspected Unexpected Serious Adverse Reaction (SUSAR) is a suspected adverse reaction that is both serious and unexpected (not identified in the Investigator's Brochure<sup>29</sup>). Sponsor will inform Investigators of SUSARs in a manner and timeframe consistent with applicable national regulatory requirements.

The study will comply with all local regulatory requirements. This study adheres to the definition and reporting requirements of ICH Guideline for Clinical Safety Data Management, Definitions and Standards for Expedited Reporting.

## **8 STUDY COMMITTEES**

### **8.1 Study Steering Committee**

A study steering committee (SSC – VISION-DMD) will be responsible for protocol development, review of any study amendments, and coordination of study conduct and interpretation of study results. The SSC comprises the Sponsor, study chairs and medical monitors for the VBP15-003, VBP15-LTE, VBP15-004, and other studies, as applicable, the project managers, and the patient representatives.

### **8.2 Data and Safety Monitoring Board**

An unblinded Data and Safety Monitoring Board (DSMB), operating autonomously from the SSC and the site investigators, will be responsible for providing independent recommendations to the SSC about risk-benefit of the study and for any modification affecting safety or data integrity required during the course of the study. The DSMB members must not be actively involved in study design, conduct or daily management of this study and must not have financial, propriety, professional, or other interests that may affect impartial, independent decision-making.

Specialists may be invited to participate as non-voting members at any time if additional expertise is desired. The DSMB will formally interact with the SSC through the sharing of blinded DSMB meeting minutes.

The DSMB will be responsible for:

- Examining accumulating safety and other relevant data at pre-specified points during the course of the study in order to make recommendations concerning continuation, termination, or modification of the study;
- Reviewing important protocol deviations;
- Providing expert advice to the SSC on an ad hoc basis regarding matters such as safety concerns or diagnostic evaluations in individual subjects;
- Based on the results of its deliberations, the DSMB can recommend continuation of the studies unchanged, study interruption, study termination, modification of the studies, or alteration in the DSMB monitoring plan.

## 9 DATA COLLECTION

### 9.1 Source Documents

Source documents are defined as original documents, data, and records. These documents may include hospital records, clinical and office charts, laboratory data/information, subjects' diaries or evaluation checklists, pharmacy dispensing and other records, recorded data from automated instruments, microfilm or magnetic media, and/or x-rays. Data collected during this study must be recorded in the appropriate source documents.

Investigators will keep a record relating the names of the subjects to their enrollment numbers (subject identification log) to permit efficient verification of data subject files, when required.

A subject enrollment log is to be completed at each study site. Data recorded on the enrollment log are to include a subject identifier, the dates of enrollment and completion/termination, and the reason the subject was not entered (if applicable).

The Investigator(s)/institution(s) will permit study-related monitoring, audits, IRB/IEC review, and regulatory inspection(s), providing direct access to source data documents.

## 9.2 Electronic Case Report Form Completion

Subject data will be collected in this study using an EDC system. The EDC and database system will be OpenClinica by Akaza Research, LLC. OpenClinica is a web-based (<https://www.openclinica.com>) data entry system utilizing a high security environment. The underlying storage facility will be PostgreSQL, whose structure permits the linking of subject information across all tables in relational databases. OpenClinica uses secure socket layers (SSL) and in its Enterprise version used in this study is 21 CFR Part 11 compliant. Once an eCRF is created in the database, a data dictionary exists and the data team creates compatible paper source documentation.

The Coordinating Center will design an electronic database in OpenClinica for this study. Access rights to the EDC system for the study site team members will need to be requested. Every user of the system will be made aware of the fact that user name and password should never be shared and their electronic signature constitutes the legally binding equivalent of a handwritten signature. Only trained personnel certified by the Coordinating Center will receive a user name and password.

All data will be directly entered or collected on a source document and then entered into OpenClinica or transferred electronically to the study database (e.g., clinical laboratory results).

The Coordinating Center data management team will monitor the eCRFs for completeness and acceptability throughout the course of the study. ReveraGen personnel (or their representatives) will be allowed read-only access to all source documents in order to verify eCRF entries.

## 9.3 Data Processing

A clinical study database will be constructed from the eCRFs and any data merged electronically, and the data will be validated both manually and electronically.

Clarification of data will be requested from the study site as required. The database will be quality assured in accordance to the data management plan and will be available for statistical analysis according to the methods outlined in [Section 10.9](#) and the Statistical Analysis Plan (SAP).

## 9.4 Subject Diaries

The information recorded in the diary will be considered source documentation, and any relevant requested information recorded in the diary should be transcribed by study staff to the appropriate eCRF page.

## 10 STATISTICAL METHODS AND PLANNED ANALYSES

### 10.1 Sample Size Determination

This is a randomized, double-blind, parallel group, placebo- and active-controlled study. Study medication is administered daily in this Phase IIb trial. Data for untreated subjects from the Cooperative International Neuromuscular Research Group (CINRG) Duchenne Natural History Study<sup>38,39,40,41</sup> and data for prednisone treated subjects from the CINRG Prednisone study<sup>42</sup> were used to help estimate sample sizes for this study.

In the vamorolone VBP15-003 study and the interim analysis of the VBP15-LTE study, doses of 0.25 and 0.75 mg/kg/day showed little evidence of clinical benefit, whereas doses of 2.0 and 6.0 mg/kg/day both showed clear evidence of clinical benefit comparable to that seen with glucocorticoids (prednisone and deflazacort).

In consideration of the primary efficacy endpoint, comparison of 6.0 mg/kg/day vamorolone versus placebo, sample size calculations were performed using data from vamorolone-treated subjects from the VBP15-002/VBP15-003 24-week treatment period. The analysis compared TTSTAND velocity from the combined 2.0 and 6.0 mg/kg/day groups (Treatment Group) to the combined 0.25 and 0.75 mg/kg/day groups (Pseudo-Placebo Group).

Least squares (LS) means from the mixed model for repeated measures (MMRM) modeling of VBP15-002/VBP15-003 24-week data were used as parameter estimates of the population means in the sample size calculations for the comparison of the Treatment Group (2.0 + 6.0 mg/kg/day) vs. the Pseudo-Placebo Group (0.25 + 0.75 mg/kg/day) on the mean change from baseline at Week 24. For the estimates of standard deviations within each comparison group, simple descriptive statistics from the

VBP15-002/VBP15-003 24-week data were used. Power was estimated using two-sided t-tests assuming unequal variance, with  $\alpha = 0.05$ .

The following table shows the resultant estimated power for various sample sizes per comparison group for comparing the Treatment Group (2.0 + 6.0 mg/kg/day) vs. the Pseudo-Placebo Group (0.25 + 0.75 mg/kg/day) on the mean change from baseline at Week 24 for the alternative hypothesis that  $H_1: \mu_1 \neq \mu_2$  assuming an alpha level of 0.05 and parameter estimates from the analyses described above for TTSTAND velocity:

| Sample Size per Comparison Group | $\mu_1$<br>(Pseudo-Placebo) | $\mu_2$<br>(Treatment Group) | $\sigma_1$<br>(Pseudo-Placebo) | $\sigma_2$<br>(Treatment Group) | Estimated Power |
|----------------------------------|-----------------------------|------------------------------|--------------------------------|---------------------------------|-----------------|
| 25                               | -0.0052                     | 0.0450                       | 0.0628                         | 0.0530                          | 84.89%          |
| 28                               | -0.0052                     | 0.0450                       | 0.0628                         | 0.0530                          | 88.76%          |
| 30                               | -0.0052                     | 0.0450                       | 0.0628                         | 0.0530                          | 90.81%          |

The sample size of 25 per treatment group for 2.0 mg/kg/day, 6.0 mg/kg/day, prednisone, and placebo will result in a total enrollment of 100 subjects which will provide approximately 85% power at alpha level 0.05 to detect a statistically significant difference between 6.0 mg/kg/day and placebo on TTSTAND velocity at Week 24. Similarly, a total enrollment of 120 subjects (30 per treatment group) will provide approximately 91% power at alpha level 0.05 to detect a statistically significant difference between 6.0 mg/kg/day and placebo on TTSTAND velocity at Week 24.

Note that subjects in the prednisone and placebo groups will actually be randomized into two groups each:

- Prednisone 0.75 mg/kg/day → Vamorolone 2.0 mg/kg/day (n=15);
- Prednisone 0.75 mg/kg/day → Vamorolone 6.0 mg/kg/day (n=15);
- Placebo → Vamorolone 2.0 mg/kg/day (n=15); or
- Placebo → Vamorolone 6.0 mg/kg/day (n=15).

These groups will be pooled by initial treatment (prednisone or placebo) for the Treatment Period #1 analyses.

If the number of subjects who withdraw early from the study is high, additional subjects may be enrolled to achieve approximately 120 subjects completing the Week 24 Visit assessments.

## **10.2 Statistical and Analytical Plan (SAP)**

The sections below summarize the intended statistical methods and analyses for this study. A more detailed SAP will be written and finalized prior to any lock of the study database (final or interim, if applicable) and any analysis performed. The SAP will give a detailed description of the summaries and analyses that will be performed and will clearly describe when these analyses will take place.

### ***10.2.1 Deviations from the Statistical Analysis Plan***

Any deviation(s) from the original SAP will be described and justified in the clinical study report.

## **10.3 Analysis Populations**

Four populations will be defined for data analysis: the Safety Population, the modified Intent-to-Treat Population, the Per Protocol Population (PPP), and the Pharmacokinetic Population.

### ***10.3.1 Safety Population***

All subjects who receive at least one dose of study medication will be included in the Safety Population. The Safety Population is the primary analysis population for safety and PD assessments. Results will be presented “as treated.”

### ***10.3.2 Modified Intent-to-Treat (mITT) Population***

All subjects who receive at least one dose of study medication and have at least one post-baseline assessment will be included in the mITT Population. The mITT Population is the primary analysis population for clinical efficacy. Subjects who receive at least one dose but never have post-baseline assessments will be excluded. Results will be presented “as randomized.”



### **10.3.3 Per Protocol Population**

The Per Protocol Population (PPP) will be those subjects in the mITT Population who had no major protocol deviations and will be the secondary analysis population for analysis of the efficacy data. The PPP will also exclude some subjects because of missed assessments due to the COVID-19 pandemic. Exclusion of subjects from the PPP will be made on a subject-by-subject basis prior to database hard lock

### **10.3.4 Pharmacokinetic (PK) Population**

All subjects who receive at least one dose of vamorolone study medication and have sufficient data for PK analysis will be included in the PK Population.

## **10.4 Measures Taken to Avoid/Minimize Bias**

Not applicable.

## **10.5 Interim Analysis**

No formal interim statistical analyses are planned; however, interim safety data and overviews will be supplied to the DSMB. Since this is a blinded study, an unblinded and independent statistician will be involved in preparing the overviews for the DSMB.

These overviews will not be shared outside the unblinded and independent statistician and the unblinded DSMB members.

## **10.6 Week 24 Analysis**

The primary analyses for this study are the analyses which will be performed after all subjects complete Week 24 of Treatment Period #1. The results from these analyses will be provided to regulatory authorities. Investigators, study subjects, study staff, and monitors will remain blinded throughout the duration of the 52-week study. The Sponsor, including data management and statistical personnel, will be unblinded after the Week 24 analyses.

## **10.7 Week 48 Analysis**

The Week 48 analyses will be performed after all subjects complete Week 48 of Treatment Period #2. The results from these analyses will be provided to regulatory

authorities. All study staff may be unblinded after database lock of Treatment Period #2 data.

## 10.8 Missing, Unused, and Spurious Data

The primary analyses for the primary and secondary efficacy variables will be conducted on observed data only; the MMRMs will employ appropriate covariance structures to accommodate missing data, as described in [Section 10.9.4](#). Missing efficacy data will be imputed for supportive sensitivity analyses on the primary and secondary efficacy endpoints using the following methods:

- Multiple Imputations using Markov Chain Monte Carlo (MCMC); and
- Multiple Imputations using a Control-based Pattern Mixture Model.

Full details will be provided in the SAP.

## 10.9 Statistical Analysis

### 10.9.1 General Considerations

Statistical analyses will be performed using SAS<sup>®</sup> version 9.4 or later.

All measurements will be analyzed based upon the type of distribution, and descriptive statistics will be presented by treatment group and assessment time point, as appropriate. Descriptive statistics for continuous variables (number [N], mean, median, standard deviation [SD], minimum, and maximum), descriptive statistics for categorical variables (N and percentage), and individual subject profiles will be presented, as appropriate.

No formal interim statistical analyses are planned, apart from the interim data views and presentations to be created for the DSMB. Missing values for safety and exploratory outcomes will be treated as missing, unless stated otherwise.

Baseline measurement is defined as the last non-missing value prior to the first dose of study drug in the study.

Treatment Period #1 analyses will be summarized by four treatment groups:

- Vamorolone 2.0 mg/kg/day (n=30);
- Vamorolone 6.0 mg/kg/day (n=30);

- Prednisone 0.75 mg/kg/day (n=30); and
- Placebo (n=30).

Treatment Period #2 analyses (besides historical control comparison data) will be summarized by six treatment groups:

- Vamorolone 2.0 mg/kg/day → Vamorolone 2.0 mg/kg/day (n=30);
- Vamorolone 6.0 mg/kg/day → Vamorolone 6.0 mg/kg/day (n=30);
- Prednisone 0.75 mg/kg/day → Vamorolone 2.0 mg/kg/day (n=15);
- Prednisone 0.75 mg/kg/day → Vamorolone 6.0 mg/kg/day (n=15);
- Placebo → Vamorolone 2.0 mg/kg/day (n=15); and
- Placebo → Vamorolone 6.0 mg/kg/day (n=15).

TTSTAND, TTCLIMB, and TTRW will be analyzed using raw scores and velocity.

Velocity will be calculated as follows:

- TTSTAND velocity =  $1 / \text{TTSTAND}$  and is expressed as rises/sec
- TTCLIMB velocity =  $1 / \text{TTCLIMB}$  and is expressed as tasks/sec
- TTRW velocity =  $10 / \text{TTRW}$  and is expressed as meters/sec

Sensitivity analyses will be performed and will be described in the SAP.

### ***10.9.2 Adjustment for Multiple Comparisons***

The primary efficacy endpoint tests vamorolone 6.0 mg/kg/day vs. placebo using TTSTAND velocity at Week 24 and occurs during Treatment Period #1 of the study. The primary efficacy endpoint supports the primary objective of this study. The study is thus powered for the efficacy comparison using an alpha level of 0.05 for success.

The secondary efficacy endpoints will be tested at Week 24 along with the primary efficacy endpoint using a fixed sequential testing process where the fixed sequence of testing will be done in the following order:

1. TTSTAND velocity, vamorolone 2.0 mg/kg/day vs placebo
2. 6 Minute Walk Test (6MWT) meters walked, vamorolone 6.0 mg/kg/day vs. placebo

3. 6 Minute Walk Test (6MWT) meters walked, vamorolone 2.0 mg/kg/day vs. placebo
4. Time to Run/Walk (TTRW) 10 meters velocity, vamorolone 6.0 mg/kg/day vs. placebo
5. Time to Run/Walk (TTRW) 10 meters velocity, vamorolone 2.0 mg/kg/day vs. placebo
6. 6MWT meters walked, vamorolone 6.0 mg/kg/day vs. prednisone
7. 6MWT meters walked, vamorolone 2.0 mg/kg/day vs. prednisone

Each test in the sequence will be carried out using a two-sided alpha level of 0.05. Statistical testing of the primary/secondary efficacy endpoints will stop if a p-value  $>0.05$  occurs or if a p-value  $\leq 0.05$  occurs in the wrong direction. In case the fixed sequential testing process stops, the results of the subsequent tests will be reported with nominal p-values, but p-values  $\leq 0.05$  in the right direction will not be considered proof of statistical testing success in these subsequent tests.

All other analyses will not be corrected for multiple comparisons (tests will be performed at the 0.05 alpha level), as they will be viewed and handled in the perspective of not testing a formal hypothesis.

### ***10.9.3 Subject Disposition, Demographics, and Baseline Characteristics***

Subject disposition will be summarized by analysis population. The number of subjects enrolled, the number in each population, and the reason for discontinuation from the study will be summarized and listed.

Subject demographics (e.g., age, race, and ethnicity) and baseline characteristics (e.g., height, weight, and months/years since DMD diagnosis) will be summarized descriptively by treatment group and overall, per analysis population. Baseline characteristics between groups presented in these summary tables will be reviewed for any clinically relevant differences among the treatment groups, and may be accounted for in the statistical models for the endpoints.

#### 10.9.4 Efficacy Analyses

The evaluations of clinical efficacy will be performed using the mITT Population and PPP. Analyses will be done as per randomized treatment.

All efficacy will be summarized and listed. Where considered relevant, plots will be created.

The primary efficacy outcome is Time to Stand (TTSTAND) from supine (velocity), comparison of vamorolone 6.0 mg/kg/day vs. placebo. Secondary and exploratory efficacy outcomes are TTSTAND (velocity), comparison of vamorolone 2.0 mg/kg/day vs. placebo; the NSAA assessment; Time to Climb four stairs (TTCLIMB) (velocity); Time to Run/Walk 10 meters (TTRW) (velocity); the distance walked in 6 minutes (6MWT); hand-held myometry (elbow flexors and knee extensors); and ROM.

The primary efficacy outcome TTSTAND (velocity) change from baseline to Week 24 will be compared between the 6.0 mg/kg/day vamorolone dose group and the placebo group using a restricted maximum likelihood (REML)-based mixed model for repeated measures (MMRM). This model includes fixed effects for treatment (vamorolone 2.0 mg/kg/day, vamorolone 6.0 mg/kg/day, prednisone 0.75 mg/kg/day, and placebo), week, baseline TTSTAND, age group (per stratification), and the treatment-by-week interaction. Study week will be included in the model as a categorical variable (Weeks 6, 12, and 24) along with the treatment-by-week interaction. Within this model, pairwise comparisons (using least squares [LS] mean contrasts) will be made to compare TTSTAND velocity at 24 weeks for the vamorolone 6.0 mg/kg/day dose level with placebo (primary efficacy outcome).

For secondary outcomes, the same models will be used as for the primary outcome (REML-based MMRM including fixed effects for treatment [vamorolone 2.0 mg/kg/day, vamorolone 6.0 mg/kg/day, prednisone 0.75 mg/kg/day, and placebo], age group [ $<6$  years;  $\geq 6$  years], week, baseline, and treatment-by-week interaction).

An unstructured covariance matrix will be used, and underlying modelling assumptions will be checked. If differences between baseline characteristics exist between the treatment groups, it will be investigated if adjustment for these characteristics is clinically

788  
789 relevant and necessary. The secondary outcome measures will be compared using similar  
790 models. Full details will be provided in the SAP.

791 The following sensitivity analyses will be performed (see SAP for full details) for the  
792 primary efficacy and secondary efficacy endpoints:

- 793 • Multiple imputations using MCMC methods for missing data;
- 794 • Multiple imputations using a Control-based Pattern-Mixture Model for missing  
795 data.

796 Additional sensitivity analyses will be performed to assess the impact of COVID-19 on  
797 the primary endpoint. Supportive analyses will also be performed on the primary  
798 endpoint. Full details will be provided in the SAP.

799 Subjects who are randomized to receive vamorolone 2.0 mg/kg/day or vamorolone  
800 6.0 mg/kg/day for both treatment periods will have TTSTAND velocity change from  
801 baseline data captured over 48 weeks compared with untreated DMD historical control  
802 data. Full details will be provided in the SAP.

### 803 *10.9.5 Safety Analyses*

804 The Safety Population will be used for presentations and analyses of the safety  
805 parameters. Analyses will be done as per actual treatment received.

806  
807 In general, descriptive statistics for each safety endpoint will be presented by time point  
808 and treatment group. In addition, individual subject listings of all safety data will be  
809 created and sorted by treatment group and time point, and will be reviewed for any  
810 evidence of dose-related differences or trends in the safety profile of vamorolone. Where  
811 considered relevant, plots will be created.

812 Safety data will include BMI, weight, vital signs, 2D-echocardiogram, DXA scan, spine  
813 X-ray, eye examination results, and ACTH Stimulation Test results, and ECG results, and  
814 these will be presented using descriptive statistics. Safety laboratory data will be  
815 summarized using descriptive statistics, and out-of-range values will be listed. For safety  
816 analyses, the vamorolone doses during Treatment Period #1 will be compared to  
817 prednisone, as specified in the SAP.

In Treatment Period #1, BMI z-score change from baseline results will be compared between treatment groups using an REML-based MMRM analysis with treatment group, week of the visit, and the treatment-by-week interaction as factors, and baseline BMI z-score and age group as a covariate. Week will be included in the model as a categorical variable (Week 12 and 24) along with the treatment-by-week interaction. An unstructured within-subject covariance matrix will be used. If this analysis fails to converge, Akaike's information criterion will be used to select the best covariance structure from compound symmetry and autoregressive-1 (AR(1)). The Kenward-Roger approximation will be used to estimate denominator degrees of freedom.

Change from baseline in all continuous clinical laboratory test results will be tested using one sample t-tests with p-values presented along with the descriptive statistics at each assessment visit within each treatment group (note that pharmacodynamic biomarkers - CK for efficacy, fasting glucose and insulin for insulin resistance, and GLDH for safety - will be of special interest).

Adverse events will be coded using the Medical Dictionary for Regulatory Activities (MedDRA), version 20. The incidence of AEs will be summarized overall and by treatment group, SOC and preferred term; treatment group, SOC, preferred term, and intensity (CTCAE v 4.03 grade); and treatment group, SOC, preferred term, and relationship to study drug. Additional AE analyses will be at the subject level: the number of subjects who had any AE, the distribution of number of AEs per subject within a treatment group, worst intensity in a subject within a treatment group, highest level of relationship to study treatment for each subject within a treatment group. Adverse events associated with suicidality and abuse potential will be listed. Full details will be provided in the SAP.

Physical examination results will be listed only.

#### ***10.9.6 Pharmacodynamic Analyses***

The evaluations of PD biomarkers will be performed using the Safety Population. Analyses will be done as per actually received treatment.

All PD biomarker results will be summarized and listed.

850  
851 Serum PD biomarkers of adrenal axis suppression, insulin resistance, and bone turnover  
852 will be assessed. PD biomarkers will be analyzed using MMRMs similar to the primary  
853 efficacy model. Plots will be created. Additional exploratory PD biomarkers of both  
854 safety and efficacy may be assessed. Vamorolone-treated groups will be compared to  
855 both prednisone-treated and placebo groups.

#### 856 ***10.9.7 Patient-Reported Outcome Exploratory Analyses***

857 Patient Reported Outcomes including the TSQM, PODCI, PARS III, Ease of Study  
858 Medication Administration Assessment, and the Blindedness Assessment will be listed  
859 and presented using descriptive statistics by treatment and time point. In addition,  
860 comparison will be made for each vamorolone dose group with placebo for the PODCI  
861 and for each vamorolone dose group with prednisone and placebo for the PARS III, with  
862 p values computed for the comparisons. Full details will be provided in the SAP.  
863

#### 864 ***10.9.8 Pharmacokinetic Analyses***

865 The 2-hr post-dose plasma concentration measurements of vamorolone at Week 30 will  
866 be used for comparison of drug exposures between the two dosing groups. They will be  
867 added to PK data from previous studies in DMD boys for comparison with measurements  
868 obtained in healthy adult male subjects. All PK data will be combined in a population  
869 assessment of plasma concentrations in relation to dose and age of subjects. The PK  
870 population will be used for these analyses. A separate PK Analysis Plan will be created  
871 to further discuss these analyses.  
872

#### 873 ***10.9.9 Concurrent Medications***

874 A summary of all concomitant medications taken during the course of the study will be  
875 presented in tabular form by therapeutic drug class and generic drug name using the  
876 World Health Organization (WHO) Drug classification (Version 4.3). All concomitant  
877 medications will be detailed in the subject data listings.  
878



## 11 STUDY MANAGEMENT AND ETHICAL AND REGULATORY REQUIREMENTS

### 11.1 Regulatory Approval and Good Clinical Practice

This study will be conducted in accordance with the principles of the 18<sup>th</sup> World Medical Assembly (Helsinki, June 1964), and amendments of the 29<sup>th</sup> (Tokyo, 1975), 35<sup>th</sup> (Venice, 1983), 41<sup>st</sup> (Hong Kong, 1989), 48<sup>th</sup> (Somerset West, 1996), 52<sup>nd</sup> (Edinburgh, 2000), 53<sup>rd</sup> (Washington, 2002), 55<sup>th</sup> (Tokyo, 2004), 59<sup>th</sup> (Seoul, 2008), and 64<sup>th</sup> (Fortaleza, 2013) World Medical Assemblies and ICH E6 Guideline for Good Clinical Practice (GCP).

Further, the trial will be conducted in accordance with all applicable laws, guidances and directives of the jurisdiction where the study is being conducted

### 11.2 Investigator Responsibilities

#### 11.2.1 Subject Information and Informed Consent

It is the Investigator's responsibility to ensure that parent(s)/guardian(s) give(s) informed consent before the subject is admitted to the study, in accordance with ICH guidelines on GCP and all applicable laws, guidances and directives of the jurisdiction where the study is being conducted.

If applicable, written or verbal assent will also be obtained from each subject as required per regulations.

An approved ICF will be given to each parent/guardian written in a language they understand.

The Investigator or designee will review the study with the parent(s)/guardian(s) of each subject. The review will include the nature, scope, procedures, and possible consequences of the subject's participation in the study. The consent, assent, and review must be in a form understandable to the parent(s)/guardian(s) of the subject. The Investigator or designee and the parent(s)/guardian(s) of the subject must both sign and date the ICF after review and before the subject can participate in the study. The parent(s)/guardian(s) of the subject will receive a copy of the signed and dated form, and

the original will be retained in the site study files. The Investigator or designee must emphasize to the parent(s)/guardian(s) of the subject that study participation is entirely voluntary and that consent regarding study participation may be withdrawn at any time without penalty or loss of benefits to which the subject is otherwise entitled.

If the ICF is amended during the study, the Investigator must follow all applicable regulatory requirements pertaining to all new subjects and repeat the consent process with the amended ICF for any ongoing subjects.

### ***11.2.2 Institutional Review Board/Independent Ethics Committee Approval and Other Institutional Requirements***

Before the start of the study, the study protocol, ICF, and any other appropriate documents will be submitted to the IRB/IEC for review and approval. Per institutional requirements, the study protocol and any other appropriate documents will be submitted to relevant committees for approval.

The Investigator will forward to the Sponsor, or designee (Coordinating Center), a copy of the IRB/IEC's approval of this protocol, amendments, ICF and any changes to the ICF, as per ICH guidelines on GCP and all applicable laws, guidances and directives of the jurisdiction where the study is being conducted. The Investigator will also keep documentation of study approval by internal committees per institutional requirements.

It is the responsibility of the Sponsor to notify the competent authority of the Member State concerned and/or the IEC of any substantial amendment(s) to the protocol.

Study medication can only be supplied to the Investigator after documentation of all ethical and legal requirements for starting the study has been received by the Sponsor or designee (Coordinating Center). This documentation must also include an IRB/IEC membership list that contains members' occupations and qualifications. If the IRB/IEC will not disclose the names of the committee members, it should be asked to issue a statement confirming that the composition of the committee is in accordance with GCP.

The Investigator will keep the IRB/IEC informed regarding the progress of the study, per institutional requirements. No changes will be made in the study without IRB/IEC

approval, except when required to eliminate apparent immediate hazards to the subjects. In cases where any implemented deviation from, or a change of, the protocol to eliminate an immediate hazard(s) to trial participants is implemented without prior IRB/IEC approval, the implemented deviation should be notified as soon as possible not only to the IRB/IEC for review and approval/favorable opinion but also to the regulatory authority(ies).

While the study is ongoing and at study completion/discontinuation, the Investigator must submit to the IRB/IEC the following information in accordance with applicable regulatory requirements where the study is being conducted:

1. Information on serious or unexpected AEs, showing due diligence in providing this information as soon as possible
2. Periodic reports on the progress of the study
3. Final Study Summary upon study completion or closure.

Notification of the end of the trial will be sent to the IRB/IEC within 30 days after completion of the study close-out visit. In case the study is ended prematurely, the IRB/IEC will be notified within 15 days, including the reasons for the premature termination. The end of the trial is defined as the date of final analysis of the study data according to the SAP.

### ***11.2.3 Study Documentation***

#### ***Before the Start of the Study***

The following study documentation will be in place at the study site prior to the first administration of study drug:

- Fully signed protocol and protocol-supporting manuals
- Investigator's Brochure<sup>29</sup>
- Investigator Protocol Agreement form signed by the Investigator
- IRB/IEC-approved copy of the ICF

- Curriculum vitae of the Investigator and all sub-investigators listed on the FDA Form 1572
- A letter of IRB/IEC approval for protocol
- A list of members of the IRB/IEC and their affiliations
- A copy of the Investigator-signed FDA 1572 form
- An Investigator-signed financial disclosure form
- Investigator/site study contract.

***During the Study***

The following documentation should be added to the site study file during study conduct:

- Any paper source forms completed and subsequently entered into the study database. An explanation should be given for all missing data and any protocol deviations documented in the site study file
- Any changes to the documentation identified above (see ***Before the Start of the Study***)
- Shipping documents relating to shipment of medication (drug accountability) and bioanalytical samples
- Copies of relevant correspondence such as letters, emails, meeting notes, and telephone calls.

***After the Study***

After completion or premature termination of the trial, all of the documents identified should be in the file, together with the following:

- Study drug accountability documents
- Audit certificates (if applicable)
- Investigator delegation of responsibilities log
- Site signature log

- Subject enrollment log
- Subject identification log
- Substantive correspondence with the Sponsor and IRB/IEC
- Notification of the end of the trial to the IRB/IEC.

#### ***11.2.4 Delegation of Investigator Responsibilities***

The Investigator must (a) ensure that any individual to whom a task is delegated is qualified by education, training, and experience (and licensure, if relevant) to perform the task; and (b) provide adequate supervision. The Investigator should maintain a list of sub-investigators and other appropriately qualified persons to whom he or she has delegated significant study-related duties.

### **11.3 Protocol Deviations**

#### ***11.3.1 Protocol Deviation Definitions***

Protocol deviations should be documented in accordance with the Manual of Operations.

##### ***Protocol Deviation***

A protocol deviation is any change, divergence, or departure from the study design or procedures of a research protocol that has not been approved by the IRB/IEC.

Changes or alterations in the conduct of the trial which do not have a major impact on the subject's rights, safety or well-being, or the completeness, accuracy and reliability of the study data are considered minor protocol deviations.

##### ***Important Protocol Deviation***

An important protocol deviation is a deviation from the IRB/IEC-approved protocol that may significantly affect the subject's rights, safety, or well-being and/or the completeness, accuracy and reliability of the study data. This includes examples such as inappropriate consent, errors in drug dosing, or lack of reporting of safety data.

### ***11.3.2 Reporting Important Protocol Deviations***

Upon discovery of an important protocol deviation, the Investigator is responsible for reporting the important protocol deviation to the IRB/IEC and Sponsor or designee (Coordinating Center) within 24 hours of discovery, or according to local site requirements.

All deviations must be recorded in the CTMS.

### **11.4 Study Records Retention and Direct Access to Source Documents**

Following completion of the clinical study, the medical files of trial subjects as well as other essential documents shall be retained by the Sponsor and the Investigator for at least 10 years after completion of the clinical trial, or for a period of time as required by the applicable regulatory authority.

The Investigator must maintain a copy of all data collected for each subject treated (including eCRFs and source data). In order to assure the accuracy of data collected in the eCRF, it is mandatory that representatives of the Sponsor, or designee, as well as representatives of health authorities have direct access to original source documents (e.g., subject records, subject charts, and laboratory reports). During the review of these documents, the anonymity of the subject will be respected with strict adherence to professional standards of confidentiality.

The Sponsor reserves the right to terminate the study for refusal of the Investigator to supply source documentation of work performed in this clinical study.

The following includes, but is not limited to, the records that must be retained by the Investigator:

1. Signed informed consent documents for all subjects
2. Subject identification log
3. Subject enrollment log
4. Record of all relevant communications between the Investigator and the IRB/IEC
5. Composition of the IRB/IEC

- 079  
080 6. Record of all relevant communications between the Investigator and the Sponsor  
081 (or designee)
- 082  
083 7. List of sub-investigators and other appropriately qualified persons to whom the  
084 Investigator has delegated significant study-related duties, together with their  
roles in the study and their signatures
- 085  
086 8. Drug accountability records (See [Section 5.8.4](#))
- 087  
088 9. Record of any body fluids or tissue samples retained
- 089  
090 10. All other source documents (subject records, hospital records, laboratory records,  
etc.)
- 091  
092 11. All other documents as listed in Section 8 of the ICH consolidated guideline on  
GCP (Essential Documents for the Conduct of a Clinical Trial).

### 093 **11.5 Study Monitoring**

094  
095 In accordance with applicable regulations, GCP, and the procedures of the Sponsor or its  
096 designees, the Study Monitor will periodically contact the site and conduct on-site visits.  
097 The extent, nature, and frequency of on-site visits will be based on enrollment rate and  
098 data quality at the site. Through frequent communications (e.g., letter, e-mail, and  
099 telephone), the Study Monitor will ensure that the investigation is conducted according to  
100 protocol and regulatory requirements.

101 During these contacts, the monitoring activities will include:

- 102 1. Checking and assessing the progress of the study
- 103 2. Reviewing study data collected to date for completeness and accuracy
- 104 3. Reviewing compliance with protocol assessments
- 105 4. Conducting source document verification by reviewing eCRF database data  
106 against source documents when available (e.g., medical records, subject diaries,  
107 ICF [and assent, if applicable], laboratory result reports, raw data collection  
108 forms)
- 109 5. Identifying any issues and addressing resolutions.
- 110

111  
112 These activities will be done in order to verify that the:

- 113  
114
- 115 1. Data are authentic, accurate, and complete
  - 116 2. Safety and rights of the subjects are being protected
  - 117 3. Study is conducted in accordance with the currently approved protocol (and any  
118 amendments), GCP, and all applicable regulatory requirements.

119 The Investigator will allow the Study Monitor direct access to all relevant documents,  
120 and allocate his/her time and the time of his/her staff to the Study Monitor to discuss  
121 findings and any relevant issues.

122 In addition to contacts during the study, the Study Monitor will contact the site prior to  
123 the start of the study to discuss the protocol and data collection procedures with site  
124 personnel.

125 At study closure, Study Monitors will conduct all activities as indicated in [Section 11.7](#).

### 126 **11.6 Quality Assurance**

127  
128  
129 At its discretion, the Sponsor or its designee may conduct a quality assurance audit of this  
130 study. Auditing procedures of the Sponsor and/or its designee will be followed in order  
131 to comply with GCP guidelines and ensure acceptability of the study data for registration  
132 purposes. If such an audit occurs, the Investigator will give the auditor direct access to  
133 all relevant documents, and will allocate his/her time and the time of his/her staff to the  
134 auditor as may be required to discuss findings and any relevant issues.

135 In addition, regulatory authorities and/or the IRB/IEC may conduct an inspection of this  
136 study. If such an inspection occurs, the Investigator will allow the inspector direct access  
137 to all source documents, eCRFs, and other study documentation for source data check  
138 and/or on-site audit inspection. The Investigator must allocate his/her time and the time  
139 of his/her staff to the inspector to discuss findings of any relevant issues.

140 An explanation will be given for all missing, unused, and spurious data in the relevant  
141 section of the study report.



## 11.7 Study Termination and Site Closure

Upon completion of the study, the following activities, when applicable, must be conducted by the Study Monitor in conjunction with the Investigator, as appropriate:

1. Provision of all study data to the Sponsor
2. Data clarifications and/or resolutions
3. Accounting, reconciliation, and final disposition of used and unused study medication
4. Review of site study records for completeness.

In addition, the Sponsor reserves the right to temporarily suspend or prematurely terminate this study for any reason.

If the study is suspended or terminated for safety reason(s), the Sponsor will promptly inform the Investigator, and will also inform the regulatory authorities of the suspension or termination of the study and the reason(s) for the action. The Investigator is responsible for promptly informing the IRB/IEC, and providing the reason(s) for the suspension or termination of the study.

If the study is prematurely terminated, all study data must be returned to the Sponsor. In addition, the site must conduct final disposition of all unused study medications in accordance with the Sponsor procedures for the study.

## 11.8 Site Termination

The Sponsor may at any time, at its sole discretion, terminate the study site for various reasons, including, without limitation, the following:

1. Failure of the Investigator to enroll subjects into the study
2. Failure of the Investigator to comply with applicable laws and/or pertinent regulations
3. Submission of knowingly false information from the research facility to the Sponsor, Study Monitor, or regulatory authorities
4. Insufficient adherence to protocol requirements.

If participation of a study site is terminated, the Sponsor and Study Chair will issue a written notice to the Investigator. The written notice will contain the reasons for taking such action. If the study site is terminated for noncompliance, appropriate regulatory authorities will also be notified by the Sponsor.

Study termination and follow-up will be performed in compliance with relevant regulations where the study is being conducted.

### **11.9 Discontinuation of Study**

The Sponsor reserves the right to discontinue the study for any reason at any time. In addition, the study may be stopped at any time if, in the opinion of the Sponsor and Medical Monitor, safety data suggest that the medical safety of subjects is being or may become compromised.

## **12 DISCLOSURE OF DATA**

### **12.1 Confidentiality**

The rights and privacy of participants in this study will be protected at all times. All personal details of subjects will be treated as confidential by the Investigator. All applicable data protection laws in the relevant countries will be adhered to at all times.

Subject names will remain confidential and will not be included in the database. Only enrollment number, and birth date will be recorded on the eCRF. If the subject's name appears on any other document collected (e.g., hospital discharge summary), the name must be obliterated before the document is transmitted to the Sponsor or its designee. All study findings will be stored in electronic databases. The subjects' parents or guardians will give explicit permission for representatives of the Sponsor, regulatory authorities, and the IRB/IEC to inspect the subjects' medical records to verify the information collected. The subjects' parents or guardians will be informed that all personal information made available for inspection will be handled in the strictest confidence and in accordance with all applicable data protection / privacy laws in the relevant countries.

The parents or guardians of all participants in the United States will provide written authorization to disclose private health information either as a part of the written ICF or

as a separate authorization form. The authorization will contain all required elements specified by 21 CFR 50, and will contain a waiver of subject access to study-related private health information until the conclusion of the clinical study. The authorization will remain valid and in full force and effect until the first to occur of (1) the expiration of 2 years after the study medication is approved for the indication being studied, or (2) the expiration of 2 years after the research program is discontinued. Individual subject medical information obtained during this study is confidential, and its disclosure to third parties (other than those mentioned in this section) is strictly prohibited. In addition, medical information obtained during this study may be provided to the subject's personal physician or to other appropriate medical personnel when required in connection with the subject's continued health and welfare.

The study Investigator will maintain a subject identification log (enrollment numbers and corresponding subject names) to enable records to be identified.

## 12.2 Publication

ReveraGen BioPharma, Inc. retains the ownership of all data and results collected during this study. Therefore, the Sponsor reserves the right to use the data from this present study, either in the form of eCRFs (or copies of these), or in the form of a report, with or without comments and analysis in order to submit them to Health Authorities of any country.

Furthermore, in the event that the clinical research leads to patentable results, the Investigator (or entity acting on his/her behalf according to local requirements) shall refrain from filing patent application(s). Patent applications will be filed by ReveraGen BioPharma, Inc. or another entity delegated by ReveraGen BioPharma, Inc.

All information concerning the product as well as any information such as clinical indications for the drug, its formula, methods of manufacture and other scientific data relating to it, that have been provided by the Sponsor or designee, and are unpublished, are confidential and must remain the sole property of the Sponsor. The Investigator will agree to use the information only for the purposes of carrying out this study and for no

235  
236 other purpose unless prior written permission from the Sponsor is obtained. The Sponsor  
237 has full ownership of the eCRFs completed as part of the study.

238 By signing the study protocol, the Investigator agrees that the results of the study may be  
239 used for the purposes of national and international registration, publication, and  
240 information for medical and pharmaceutical professionals by the Sponsor. If necessary,  
241 the authorities will be notified of the Investigator's name, address, qualifications, and  
242 extent of involvement.

243 The Sponsor or designee will prepare a final report on the study. The Investigator may  
244 not publish or present any information on this study without the express written approval  
245 of the Sponsor. Additionally, the Sponsor, may, for any reason, withhold approval for  
246 publication or presentation.

### 247 **13 INVESTIGATOR PROTOCOL AGREEMENT**

248  
249 The Investigator Protocol Agreement at the front of this document must be signed by the  
250 study site Principal Investigator. The Investigator must retain the original and an  
251 electronic signed copy must be kept on file by the Sponsor. The completed Protocol  
252 Agreement signifies review and acceptance of the protocol amendment by the Principal  
253 Investigator prior to initiation of the study.

## 14 REFERENCES

1. Mah JK, Korngut L, Dykeman J, Day L, Pringsheim T, Jette N. A systemic review and meta-analysis on the epidemiology of Duchenne and Becker muscular dystrophy. *Neuromuscul Disord.* 2014; 24(6): 482-91.
2. Hoffman EP, Brown RH and Kunkel LM. Dystrophin: the protein product of the Duchenne muscular dystrophy locus. *Cell.* 1987; 51: 919-28.
3. Evans NP, Misyak SA, Robertson JL, Bassaganya-Riera J, Grange RW. Immune mediated mechanisms potentially regulate the disease time course of Duchenne muscular dystrophy and provide targets for therapeutic intervention. *PM R.* 2009; 1(8): 755-68.
4. Kumar A and Boriek AM. Mechanical stress activates the nuclear factor-kappa B pathway in skeletal muscle fibers: a possible role in Duchenne muscular dystrophy. *FASEB J.* 2003; 17(3): 386-96.
5. Acharyya S, Villalta SA, Bakkar N, et al. Interplay of IKK/NF-kappa B signaling in macrophages and myofibers promotes muscle cell degeneration in Duchenne muscular dystrophy. *J Clin Invest.* 2007; 117(4): 889-901.
6. Dogra C, Changothra H, Wergedal JE, Kumar A. Regulation of phosphatidylinositol-3-kinase (PI3K)/Akt and nuclear factor-kappa B signaling pathways in dystrophin-deficient skeletal muscle in response to mechanical stretch. *J Cell Physiol.* 2006; 208(3): 575-85.
7. Pahl HL. Activators and target genes of Rel/NF-kappa B transcription factors. *Oncogene.* 1999; 18(49): 6853-66.
8. Spencer MJ, Montecino-Rodriguez E, Dorshkind K, Tidball JG. Helper (CD4(+)) and cytotoxic (CD8(+)) T cells promote the pathology of dystrophin-deficient muscle. *Clin Immunol.* 2001; 98(2): 235-43.
9. Spencer MJ and Tidball JG. Do immune cells promote the pathology of dystrophin-deficient myopathies? *Neuromuscul Disord.* 2001; 11(6-7): 556-64.

- 285
- 286 10. Malik V, Rodino-Klapac L and Mendell JR. Emerging drug for Duchenne
- 287 muscular dystrophy. *Expert Opin Emerg Drugs*. 2012; 17(2): 261-77.
- 288 11. Reeves EK, Hoffman EP, Nagaraju K, Damsker JM, McCall JM. VBP15:
- 289 preclinical characterization of a novel anti-inflammatory delta 9,11 steroid.
- 290 *Bioorg Med Chem*. 2013; 21(8): 2241-9.
- 291 12. Bushby K, Finkel R, Birnkrant DJ, et al. Diagnosis and management of
- 292 Duchenne muscular dystrophy, part 1: diagnosis, and pharmacological and
- 293 psychosocial management. *Lancet Neurol*. 2010; 9(1): 77-93.
- 294 13. Pane M, Mazzone ES, Sivo S, et al. Long term natural history data in
- 295 ambulant Boys with Duchenne muscular dystrophy: 36-month changes.
- 296 *PlosOne*. 2014; 10: 1371/journal.pone.0108205.
- 297 14. Manzur AY, Kuntzer T, Pike M, Swan AV. Glucocorticoid corticosteroids for
- 298 Duchenne muscular dystrophy. *Cochrane Database Syst Rev*. 2008; (1):
- 299 CD003725.
- 300 15. Heier CR, Damsker JM, Yu Q, et al. VBP15, a novel anti-inflammatory and
- 301 membrane-stabilizer improves muscular dystrophy without side effects.
- 302 *EMBO Mol Med*. 2013; 5(10): 1569-85.
- 303 16. Damsker JM, Dillingham BC, Rose MC, et al. VBP15, a glucocorticoid
- 304 analogue, is effective at reducing allergic lung inflammation in mice. *Plos*
- 305 *One*. 2013; 8(5): e63871.
- 306 17. Dillingham BC, Knobloch SM, Many GM, et al. VBP15, a novel anti-
- 307 inflammatory, is effective at reducing the severity of murine experimental
- 308 autoimmune encephalomyelitis. *Cell Mol Neurobiol*. 2015; 35(3): 377-87.
- 309 18. Dadgar S, Wang Z, Johnston H, et al. Asynchronous remodeling is a driver of
- 310 failed regeneration in Duchenne muscular dystrophy. *J Cell Biol*. 2014;
- 311 207(1): 139-58.
- 312 19. Raman SV, Hor KN, Mazur W, Halnon NJ, Kissel JT, He X, Tran T, Smart S,
- 313 McCarthy B, Taylor MD, Jefferies JL, Rafael-Fortney JA, Lowe J, Roble SL,

- 314  
315 Cripe LH. Eplerenone for early cardiomyopathy in Duchenne muscular  
316 dystrophy: a randomised, double-blind, placebo-controlled trial. *Lancet*  
317 *Neurol.* 2015; 14(2): 153-61.
- 318 20. Avioli LV. Glucocorticoid effects on statural growth. *Br J Rheumatol.* 1993;  
319 32 Suppl 2: 27-30.
- 320 21. Wolthers OD and Pedersen S. Short term linear growth in asthmatic children  
321 during treatment with prednisolone. *BMJ.* 1990; 301(6744): 145-8.
- 322 22. Bircan Z, Soran M, Yildirim I, et al. The effect of alternate-day low dose  
323 prednisolone on bone age in children with steroid dependent nephrotic  
324 syndrome. *Int Urol Nephrol.* 1997; 29(3): 357-61.
- 325 23. Manolagas SC, Weinstein RS. New developments in the pathogenesis and  
326 treatment of steroid-induced osteoporosis. *J Bone Miner Res.* 1999; 14(7):  
327 1061-6.
- 328 24. Sali A, Guerron AD, Gordish-Dressman H, et al. Glucocorticoid-treated mice  
329 are an inappropriate positive control for long-term preclinical studies in the  
330 mdx mouse. *Plos One.* 2012; 7(4): e34204.8
- 331 25. Kauh E, Mixson L, Malice M-P, Mesens S, Ramael S, Burke J, Reynders T,  
332 Van Dyck K, Beals C, Rosenberg E, and Ruddy M. Prednisone affects  
333 inflammation, glucose tolerance, and bone turnover within hours of treatment  
334 in healthy individuals. *European J Endocrinol.* 2012; 166: 459–67.
- 335 26. Wehling-Henricks M, Oltmann M, Rinaldi C, Myung KH, and Tidball JG.  
336 Loss of positive allosteric interactions between neuronal nitric oxide synthase  
337 and phosphofructokinase contributes to defects in glycolysis and increased  
338 fatigability in muscular dystrophy. *Hum Mol Genet.* 2009; 18(18): 3439-51.
- 339 27. Younes M, Neffati F, Touzi M, Hassen-Zrouer S, Fendri Y, Bejia I, Ben Amor  
340 A, Bergaoui N, and Najjar MF. Systemic effects of epidural and intraarticular  
341 glucocorticoid injections in diabetic and non-diabetic patients. *Joint Bone*  
342 *Spine.* 2007; 74(5): 472-6.

- 343  
344 28. Moon HJ, Choi KH, Lee SI, Lee OJ, Shin JW, and Kim TW. Changes in  
345 blood glucose and cortisol levels after epidural or shoulder intra-articular  
346 glucocorticoid injections in diabetic or nondiabetic patients. *Am J Phys Med  
347 Rehabil.* 2014; 93(5): 372-8.
- 348 29. Investigator's Brochure, Version 8, Vamorolone (VBP15) (17 $\alpha$ , 21-  
349 dihydroxy-16 $\alpha$ -methyl-pregna-1,4,9(11)-triene-3,20-dione) 1.33% and 4%  
350 Oral Suspension, ReveraGen BioPharma, Inc., September 24, 2018.
- 351 30. Fleishaker DL, Mukherjee A, Whaley FS, Daniel S, Zeiher BG. Safety and  
352 pharmacodynamic dose response of short-term prednisone in healthy adult  
353 subjects: a dose ranging, randomized, placebo-controlled, crossover study.  
354 *BMC Musculoskelet Disord.* 2016 Jul 16;17:293.
- 355 31. Hathout Y, Conklin LS, Seol H, Gordish-Dressman H, Brown KJ, Morgenroth  
356 LP, Nagaraju K, Heier CR, Damsker JM, van den Anker JN, Henricson E,  
357 Clemens PR, Mah JK, McDonald C, Hoffman EP. Serum pharmacodynamic  
358 biomarkers for chronic corticosteroid treatment of children. *Sci Rep.* 2016;  
359 Aug 17;6:31727. doi:10.1038/srep31727.
- 360 32. Agwu, J.C., et al., *Tests of adrenal insufficiency.* Arch Dis Child, 1999. **80**(4):  
361 p. 330-3.
- 362 33. van Staa TP, Leufkens HG, Abenhaim L, Zhang B, Cooper C. Oral  
363 corticosteroids and fracture risk: relationship to daily and cumulative doses.  
364 *Rheumatology (Oxford).* 2000 Dec; 39(12): 1383-9.
- 365 34. FDA Draft Guidance for Industry: Duchenne muscular dystrophy and related  
366 dystrophinopathies: developing drugs for treatment. June 2015.
- 367 35. Brooke MH, Griggs RC, Mendell JR, et al. Clinical trial in Duchenne  
368 dystrophy. I. The design of the protocol. *Muscle & Nerve.* 1981; 4(3): 186-97.
- 369 36. Mazzone ES, Messina S, Vasco G, et al. Reliability of the North Star  
370 Ambulatory Assessment in a multicentric setting. *Neuromuscul Disord.* 2009;  
371 19(7): 458-61.



- 372  
373  
374  
375  
376  
377  
378  
379  
380  
381  
382  
383  
384  
385  
386  
387  
388  
389  
390  
391  
392  
393  
394  
395
37. McDonald CM, Henricson EK, Han JJ, et al. The 6-minute Walk Test as a new outcome measure in Duchenne muscular dystrophy. *Muscle Nerve*. 2010; 41(4): 500-10.
  38. Bello L, Kesari A, Gordish-Dressman H, et al. Genetic modifiers of ambulation in the Cooperative International Neuromuscular Research Group Duchenne natural history study. *Ann Neurol*. 2015; 77(4):684-696.
  39. Spurney C, Shimizu R, Morgenroth LP, et al. Cooperative International Neuromuscular Research Group Duchenne Natural History Study demonstrates insufficient diagnosis and treatment of cardiomyopathy in Duchenne muscular dystrophy. *Muscle Nerve*. 2014; Aug; 50(2):250-256.
  40. McDonald CM, Henricson EK, Abresch RT, et al. The Cooperative International Neuromuscular Research Group Duchenne natural history study – a longitudinal investigation in the era of glucocorticoid therapy: design of protocol and the methods used. *Muscle Nerve*. 2013; 48(1):32-54.
  41. Henricson EK, Abresch RT, Cnaan A, et al. The Cooperative International Neuromuscular Research Group Duchenne natural history study: glucocorticoid treatment preserves clinically meaningful function milestones and reduces rate of disease progression as measured by manual muscle testing and other commonly used clinical trial outcome measures. *Muscle Nerve*. 2013; 48(1):55-67.
  42. Escolar DM, Hache LP, Clemens PR, et al. Randomized, blinded trial of weekend vs. daily prednisone in Duchenne muscular dystrophy. *Neurology*. 2011; 77(5):444-452.

**15 APPENDICES**

## Appendix 15.1 Protocol Amendment #4 Complete List of Changes

The following changes have been incorporated into the protocol under this protocol amendment, as summarized in Protocol Amendment Tracking, Reasons for Protocol Amendment #4. Protocol sections that have been changed are itemized below with the original and revised text. Correction of typographical errors is not itemized.

### Sections Changed:

#### Synopsis: Primary Objectives, #1

##### Section 2.1.1: Primary Objectives, #1

#### *Original Text:*

1. To compare the efficacy of vamorolone administered orally at daily doses of 2.0 mg/kg and 6.0 mg/kg over a 24-week treatment period vs. placebo in ambulant boys ages 4 to <7 years with DMD; and

#### *Revised Text:*

1. To compare the efficacy of vamorolone administered orally at daily doses of 6.0 mg/kg over a 24-week treatment period vs. placebo in ambulant boys ages 4 to <7 years with DMD; and

### Sections Changed:

#### Synopsis: Secondary Objectives, #1-3

##### Section 2.1.2: Secondary Objectives, #1-3

#### *Original Text:*

1. To compare the safety of vamorolone administered orally at daily doses of 2.0 mg/kg and 6.0 mg/kg over a 24-week treatment period vs. daily prednisone 0.75 mg/kg in ambulant boys ages 4 to <7 years with DMD;
2. To compare the efficacy of vamorolone administered orally at daily doses of 2.0 mg/kg and 6.0 mg/kg over a 24-week treatment period vs. daily prednisone 0.75 mg/kg in ambulant boys ages 4 to <7 years with DMD;
3. To compare the efficacy of vamorolone administered orally at daily doses of 2.0 mg/kg vs. vamorolone administered orally at daily doses of 6.0 mg/kg over a 24-week treatment period in ambulant boys ages 4 to <7 years with DMD;

#### *Revised Text:*

1. To compare the efficacy of vamorolone administered orally at daily doses of 2.0 mg/kg over a 24-week treatment period vs. placebo in ambulant boys ages 4 to <7 years with DMD;
2. To compare the safety of vamorolone administered orally at daily doses of 2.0 mg/kg and 6.0 mg/kg over a 24-week treatment period vs. daily prednisone 0.75 mg/kg in ambulant boys ages 4 to <7 years with DMD;
3. To compare the efficacy of vamorolone administered orally at daily doses of 2.0 mg/kg and 6.0 mg/kg over a 24-week treatment period vs. daily prednisone 0.75 mg/kg in ambulant boys ages 4 to <7 years with DMD;

**Section Changed:**

**Synopsis: Synopsis, Pharmacodynamic Measures, sentence #2**

***Original Text:***

Secondary outcomes are serum biomarkers bridged to clinical outcomes of safety, including adrenal suppression, insulin resistance, bone turnover, and immune suppression.

***Revised Text:***

Secondary outcomes are serum biomarkers bridged to clinical outcomes of safety, including adrenal suppression, insulin resistance, and bone turnover.

**Sections Changed:**

**Synopsis: Statistical Methods, Sample Size, paragraphs #2 and #3**

**Section 10.1: Sample Size Determination, paragraphs #2 and #3**

***Original Text:***

The primary efficacy outcome is TTSTAND (velocity) change from baseline to Week 24. A sample size of 30 subjects per treatment group (120 total subjects) will detect a 0.0674 point difference in mean change from baseline to Week 24 in TTSTAND (velocity) between a vamorolone dose level and placebo, assuming a common standard deviation of 0.08, a two-sided t test, and a Type-I error of 0.025 with approximately 83% power. The Bonferroni adjustment method will be used to control the Type-I error rate at 0.05 due to the multiple comparisons (2 vamorolone dose levels will be tested against placebo).

Based on this calculation, a total of approximately 120 subjects will be randomized to treatment with vamorolone 2.0 mg/kg/day (n=30), vamorolone 6.0 mg/kg/day (n=30), prednisone 0.75 mg/kg/day (n=30), or placebo (n=30).

***Revised Text:***

In the vamorolone VBP15-003 study and the interim analysis of the VBP15-LTE study, doses of 0.25 and 0.75 mg/kg/day showed little evidence of clinical benefit, whereas doses of 2.0 and 6.0 mg/kg/day both showed clear evidence of clinical benefit comparable to that seen with glucocorticoids (prednisone and deflazacort).

In consideration of the primary efficacy endpoint in the current study, comparison of 6.0 mg/kg/day vamorolone versus placebo, sample size calculations were performed using data from vamorolone-treated subjects from the VBP15-002/VBP15-003 24-week treatment period. The analysis compared TTSTAND velocity from the combined 2.0 and 6.0 mg/kg/day groups (Treatment Group) to the combined 0.25 and 0.75 mg/kg/day groups (Pseudo-Placebo Group).

Least squares (LS) means from the mixed model for repeated measures (MMRM) modeling of VBP15-002/VBP15-003 24-week data were used as parameter estimates of the population means in the sample size calculations for the comparison of the Treatment Group (2.0 + 6.0 mg/kg/day) vs. the Pseudo-Placebo Group (0.25 + 0.75 mg/kg/day) on the mean change from baseline at Week 24. For the estimates of standard deviations within each comparison group, simple descriptive statistics from the VBP15-002/VBP15-003 24-week data were used. Power was estimated using two-sided t-tests assuming unequal variance, with  $\alpha = 0.05$ .

The following table shows the resultant estimated power for various sample sizes per comparison group for comparing the Treatment Group (2.0 + 6.0 mg/kg/day) vs. the Pseudo-Placebo Group (0.25 + 0.75 mg/kg/day) on the mean change from baseline at Week 24 for the alternative hypothesis that  $H_1: \mu_1 \neq \mu_2$

assuming an alpha level of 0.05 and parameter estimates from the analyses described above for TTSTAND velocity:

| Sample Size per Comparison Group | $\mu_1$ (Pseudo-Placebo) | $\mu_2$ (Treatment Group) | $\sigma_1$ (Pseudo-Placebo) | $\sigma_2$ (Treatment Group) | Estimated Power |
|----------------------------------|--------------------------|---------------------------|-----------------------------|------------------------------|-----------------|
| 25                               | -0.0052                  | 0.0450                    | 0.0628                      | 0.0530                       | 84.89%          |
| 28                               | -0.0052                  | 0.0450                    | 0.0628                      | 0.0530                       | 88.76%          |
| 30                               | -0.0052                  | 0.0450                    | 0.0628                      | 0.0530                       | 90.81%          |

The sample size of 25 per treatment group for 2.0 mg/kg/day, 6.0 mg/kg/day, prednisone, and placebo will result in a total enrollment of 100 subjects which will provide approximately 85% power at alpha level 0.05 to detect a statistically significant difference between 6.0 mg/kg/day and placebo on TTSTAND velocity at Week 24. Similarly, a total enrollment of 120 subjects (30 per treatment group) will provide approximately 91% power at alpha level 0.05 to detect a statistically significant difference between 6.0 mg/kg/day and placebo on TTSTAND velocity at Week 24.

### **Section Changed:**

### **Synopsis: Statistical Methods, Analysis Populations**

#### ***Original Text:***

Three populations will be defined for data analysis: the Safety Population, the modified Intent-to-Treat Population, and the Pharmacokinetic Population.

#### **Safety Population**

All subjects who receive at least one dose of study medication will be included in the Safety Population. The Safety Population is the primary analysis population for safety and PD assessments. Results will be presented “as treated.”

#### **Modified Intent-to-Treat (mITT) Population**

All subjects who receive at least one dose of study medication and have at least one post-baseline assessment will be included in the mITT Population. The mITT Population is the primary analysis population for clinical efficacy. Subjects who receive at least one dose of study medication but never have post-baseline assessments will be excluded. Results will be presented “as randomized.”

#### **Pharmacokinetic (PK) Population**

All subjects who receive at least one dose of vamorolone study medication and have sufficient data for PK analysis will be included in the PK Population.

#### ***Revised Text:***

Four populations will be defined for data analysis: the Safety Population, the modified Intent-to-Treat Population, the Per Protocol Population (PPP), and the Pharmacokinetic (PK) Population.

#### **Safety Population**

All subjects who receive at least one dose of study medication will be included in the Safety Population. The Safety Population is the primary analysis population for safety and PD assessments. Results will be presented “as treated.”

#### **Modified Intent-to-Treat (mITT) Population**

All subjects who receive at least one dose of study medication and have at least one post-baseline assessment will be included in the mITT Population. The mITT Population is the primary analysis population for clinical efficacy. Subjects who receive at least one dose of study medication but never have post-baseline assessments will be excluded. Results will be presented “as randomized.”

530  
531 Per Protocol Population

532 The PPP will be those subjects in the mITT Population who had no major protocol deviations and will be  
533 the secondary analysis population for analysis of the efficacy data. The PPP will also exclude some  
534 subjects because of missed assessments due to the COVID-19 pandemic. Exclusion of subjects from the  
535 PPP will be made on a subject-by-subject basis prior to database hard lock.

536 Pharmacokinetic (PK) Population

537 All subjects who receive at least one dose of vamorolone study medication and have sufficient data for PK  
538 analysis will be included in the PK Population.

540 **Sections Changed:**  
541

542 **Synopsis: Statistical Methods, Adjustment for Multiple Comparisons, paragraphs**  
543 **#1-4**

544 **Section 10.9.2: Adjustment for Multiple Comparisons, paragraphs #1-4**  
545

546 ***Original Text:***

547 The primary efficacy endpoint tests each dose of vamorolone vs. placebo using TTSTAND velocity at  
548 Week 24 and occurs during Treatment Period #1 of the study. The primary efficacy endpoint supports the  
549 primary objective of this study. The study is thus powered for the efficacy comparisons.

550 A multi-branched gatekeeping procedure will be utilized for the primary efficacy endpoint. The primary  
551 efficacy endpoint (TTSTAND velocity at Week 24) will be tested first using a Bonferroni adjustment. Any  
552 dose that is significant for the primary efficacy endpoint will then have the secondary efficacy endpoints  
553 tested sequentially. Further details are provided below.

554 For primary efficacy (TTSTAND velocity), the two vamorolone dose levels will be compared with  
555 placebo. To account for these comparisons (two vamorolone dose levels vs. placebo), Bonferroni multiple  
556 comparison adjustments will be utilized. Each comparison will be conducted at the 0.025 (0.05/2) alpha  
557 level.

558 Secondary efficacy endpoints will be tested sequentially on change from baseline to Week 24 values (each  
559 dose of vamorolone vs. placebo or prednisone [6MWT only]). Only the doses that are significant for the  
560 primary efficacy endpoint (change in TTSTAND velocity at Week 24) will have the secondary endpoints  
561 tested. A 0.025 alpha level will be used for the sequential testing. Testing will stop once a p-value is  
562 >0.025 for one of the secondary efficacy endpoints. The Week 24 change from baseline values will be  
563 tested using this sequential testing procedure. The order of the secondary efficacy endpoints is as follows.

- 564
- 565 1. Six-minute Walk Test (6MWT) vs. placebo
  - 566 2. Time to Run/Walk 10 meters Test (TTRW) velocity vs. placebo
  - 567 3. 6MWT vs. prednisone
  - 568 4. North Star Ambulatory Assessment (NSAA) vs. placebo
  - 569 5. Hand-held Myometry (knee extensors) vs. placebo
  - 570 6. Hand-held Myometry (elbow flexors) vs. placebo
  - 571 7. Time to Climb 4 Steps (TTCLIMB) velocity vs. placebo
  8. Range of Motion (ROM) in the ankles vs. placebo

572 ***Revised Text:***

573 The primary efficacy endpoint tests vamorolone 6.0 mg/kg/day vs. placebo using TTSTAND velocity at  
574 Week 24 and occurs during Treatment Period #1 of the study. The primary efficacy endpoint supports the  
575 primary objective of this study. The study is thus powered for the efficacy comparison using an alpha level  
576 of 0.05 for success.

The secondary efficacy endpoints will be tested at Week 24 along with the primary efficacy endpoint using a fixed sequential testing process where the fixed sequence of testing will be done in the following order:

1. TTSTAND velocity, vamorolone 2.0 mg/kg/day vs placebo
2. 6 Minute Walk Test (6MWT) meters walked, vamorolone 6.0 mg/kg/day vs. placebo
3. 6 Minute Walk Test (6MWT) meters walked, vamorolone 2.0 mg/kg/day vs. placebo
4. Time to Run/Walk (TTRW) 10 meters velocity, vamorolone 6.0 mg/kg/day vs. placebo
5. Time to Run/Walk (TTRW) 10 meters velocity, vamorolone 2.0 mg/kg/day vs. placebo
6. 6MWT meters walked, vamorolone 6.0 mg/kg/day vs. prednisone
7. 6MWT meters walked, vamorolone 2.0 mg/kg/day vs. prednisone

Each test in the sequence will be carried out using a two-sided alpha level of 0.05. Statistical testing of the primary/secondary efficacy endpoints will stop if a p-value  $>0.05$  occurs or if a p-value  $\leq 0.05$  occurs in the wrong direction. In case the fixed sequential testing process stops, the results of the subsequent tests will be reported with nominal p-values, but p-values  $\leq 0.05$  in the right direction will not be considered proof of statistical testing success in these subsequent tests.

### **Section Changed:**

### **Synopsis: Statistical Methods, Efficacy Analysis, paragraphs #1 and #2**

#### ***Original Text:***

All evaluations of clinical efficacy will be listed and presented using descriptive statistics per treatment group and time point. The primary efficacy outcome is TTSTAND (velocity). Secondary efficacy outcomes are the NSAA assessment, TTCLIMB, TTRW, 6MWT, hand-held myometry (elbow flexors and knee extensors), and ROM. TTSTAND, TTCLIMB, and TTRW will be analyzed using raw scores and velocity.

The primary efficacy outcome TTSTAND (velocity) change from baseline to Week 24 will be compared between each of the two different vamorolone dose groups and the placebo group using a restricted maximum likelihood (REML)-based mixed model for repeated measures (MMRM). This model includes fixed effects for treatment (vamorolone 2.0 mg/kg/day, vamorolone 6.0 mg/kg/day, prednisone 0.75 mg/kg/day, and placebo), week, baseline TTSTAND, age group (per stratification), and the treatment-by-week interaction. Study week will be included in the model as a categorical variable (Weeks 6, 12, and 24) along with the treatment-by-week interaction. Within this model, pairwise comparisons (using least squares [LS] mean contrasts) will be made to compare TTSTAND at 24 weeks for each vamorolone dose level with placebo separately (primary efficacy outcome), for each vamorolone dose level with prednisone separately (secondary analysis), and for the high vamorolone dose level with the low vamorolone dose level (secondary analysis). Treatments will also be compared at other weeks as secondary analyses. An unstructured covariance matrix will be used, and underlying modelling assumptions will be checked. If differences between baseline characteristics exist between the three treatment groups in this comparison, it will be investigated if adjustment for these characteristics is clinically relevant and necessary. The secondary outcome measures will be compared using similar models.

#### ***Revised Text:***

All evaluations of clinical efficacy will be listed and presented using descriptive statistics per treatment group and time point. The primary efficacy outcome is TTSTAND (velocity), comparison of vamorolone 6.0 mg/kg/day vs placebo. Secondary and exploratory efficacy outcomes are TTSTAND (velocity), comparison of vamorolone 2.0 mg/kg/day vs placebo; the NSAA assessment; TTCLIMB (velocity); TTRW (velocity); 6MWT; hand-held myometry (elbow flexors and knee extensors); and ROM.

The primary efficacy outcome TTSTAND (velocity) change from baseline to Week 24 will be compared between the 6.0 mg/kg/day vamorolone dose group and the placebo group using a restricted maximum likelihood (REML)-based mixed model for repeated measures (MMRM). This model includes fixed

effects for treatment (vamorolone 2.0 mg/kg/day, vamorolone 6.0 mg/kg/day, prednisone 0.75 mg/kg/day, and placebo), week, baseline TTSTAND, age group (per stratification), and the treatment-by-week interaction. Study week will be included in the model as a categorical variable (Weeks 6, 12, and 24) along with the treatment-by-week interaction. Within this model, pairwise comparisons (using least squares [LS] mean contrasts) will be made to compare TTSTAND velocity at 24 weeks for the vamorolone 6.0 mg/kg/day dose level with placebo (primary efficacy outcome).

For secondary outcomes, the same models will be used as for the primary outcome (REML-based MMRM including fixed effects for treatment [vamorolone 2.0 mg/kg/day, vamorolone 6.0 mg/kg/day, prednisone 0.75 mg/kg/day, and placebo], age group [ $<6$  years;  $\geq 6$  years], week, baseline, and treatment-by-week interaction).

An unstructured covariance matrix will be used, and underlying modelling assumptions will be checked. If differences between baseline characteristics exist between the treatment groups, it will be investigated if adjustment for these characteristics is clinically relevant and necessary. The secondary outcome measures will be compared using similar models.

Sensitivity analyses will be performed to assess the impact of COVID-19 on the primary endpoint. Additional sensitivity and supportive analyses will be performed on the primary and secondary outcomes. Full details will be provided in the SAP.

### **Sections Changed:**

#### **Synopsis: Statistical Methods, Patient Reported Outcome Analyses**

##### **Section 10.9.7: Patient Reported Outcome Exploratory Analyses**

#### ***Original Text:***

Patient Reported Outcomes including the TSQM, PODCI, PARS III, Ease of Study Medication Administration Assessment, and the Blindedness Assessment will be listed and presented using descriptive statistics by treatment and time point. In addition, comparison will be made for each vamorolone dose group with placebo for the PODCI and for each vamorolone dose group with prednisone for the PARS III, with p values computed for the comparisons. Full details will be provided in the SAP.

#### ***Revised Text:***

Patient Reported Outcomes including the TSQM, PODCI, PARS III, Ease of Study Medication Administration Assessment, and the Blindedness Assessment will be listed and presented using descriptive statistics by treatment and time point. In addition, comparison will be made for each vamorolone dose group with placebo for the PODCI and for each vamorolone dose group with prednisone and placebo for the PARS III, with p values computed for the comparisons. Full details will be provided in the SAP.

### **Section Changed:**

#### **Synopsis: Statistical Methods, Safety Analyses**

#### ***Original Text:***

All evaluations of clinical safety will be listed and presented using descriptive statistics per treatment group and time point. For the safety analyses, the vamorolone dose levels will be compared to prednisone.

Safety data will include BMI, weight, vital signs, 2D-echocardiogram, DXA scan, spine x-ray, eye examination results, ACTH Stimulation Test results, and ECG results, and these will be presented using descriptive statistics. Safety laboratory data will be summarized using descriptive statistics, and out-of-range values will be listed. Adverse events will be summarized overall and by treatment group, system organ class (SOC) and preferred term (using the Medical Dictionary for Regulatory Activities [MedDRA]); by treatment group and relationship to study medication; and by treatment group and intensity (CTCAE grade).



In Treatment Period #1, BMI z-score change from baseline data captured over 24 weeks will be compared for subjects who are randomized to receive vamorolone 2.0 mg/kg/day or vamorolone 6.0 mg/kg/day vs. subjects randomized to receive prednisone. The same MMRM that is used for the primary efficacy analysis will be used for BMI z-score. The test for statistical significance will be performed at the 0.05 level. Subjects who are randomized to receive vamorolone 2.0 mg/kg/day or vamorolone 6.0 mg/kg/day for both treatment periods will have their BMI z-score change from baseline data captured over 48 weeks compared with prednisone-treated DMD historical control data. Full details will be provided in the SAP.

***Revised Text:***

All evaluations of clinical safety will be listed and presented using descriptive statistics per treatment group and time point. For the safety analyses during Treatment Period #1, the vamorolone dose levels will be compared to prednisone, as specified in the SAP.

Safety data will include BMI, weight, vital signs, 2D-echocardiogram, DXA scan, spine x-ray, eye examination results, ACTH Stimulation Test results, and ECG results, and these will be presented using descriptive statistics. Safety laboratory data will be summarized using descriptive statistics, and out-of-range values will be listed. Adverse events will be summarized overall and by treatment group, system organ class (SOC) and preferred term (using the Medical Dictionary for Regulatory Activities [MedDRA]); by treatment group and relationship to study medication; and by treatment group and intensity (CTCAE grade). Suicidality and abuse potential associated with treatment will be assessed by examination of adverse event data. Full details will be provided in the SAP.

In Treatment Period #1, BMI z-score change from baseline results will be compared between treatment groups using an REML-based MMRM analysis with treatment group, week of the visit, and the treatment-by-week interaction as factors, and baseline BMI z-score and age group as a covariate. Week will be included in the model as a categorical variable (Week 12 and 24) along with the treatment-by-week interaction. An unstructured within-subject covariance matrix will be used. If this analysis fails to converge, Akaike's information criterion will be used to select the best covariance structure from compound symmetry and autoregressive-1 (AR(1)). The Kenward-Roger approximation will be used to estimate denominator degrees of freedom.

Change from baseline in all continuous clinical laboratory test results will be tested using one sample t-tests with p-values presented along with the descriptive statistics at each assessment visit within each treatment group.

**Sections Changed:**

**Synopsis: Statistical Methods, Pharmacodynamics Analyses, sentence #1**  
**Section 10.9.6: Pharmacodynamic Analyses, sentence #1**

***Original Text:***

Serum PD biomarkers of adrenal axis suppression, insulin resistance, bone turnover, and immune suppression will be assessed.

***Revised Text:***

Serum PD biomarkers of adrenal axis suppression, insulin resistance, and bone turnover will be assessed.

**Section Changed:**

**List of Abbreviations**

***Original Text:***

|         |                                                       |
|---------|-------------------------------------------------------|
| PK      | pharmacokinetics                                      |
| PODCI   | Pediatric Outcomes Data Collection Instrument         |
| PR [PQ] | time from onset of P wave to start of the QRS complex |
| QD      | once daily (dosing)                                   |

***Revised Text:***

|         |                                                       |
|---------|-------------------------------------------------------|
| PK      | pharmacokinetics                                      |
| PODCI   | Pediatric Outcomes Data Collection Instrument         |
| PPP     | Per Protocol Population                               |
| PR [PQ] | time from onset of P wave to start of the QRS complex |
| QD      | once daily (dosing)                                   |

**Section Changed:**

**Section 1.4: Rationale for Study Design, paragraph #5**

***Original Text:***

The primary efficacy outcome is the Time to Stand (TTSTAND) from the floor (velocity), and comparisons will be made between each dose level of vamorolone and the placebo group at Week 24. Multiple secondary efficacy outcomes will be measured, including Time to Run/Walk 10 meters (TTRW), Time to Climb four stairs (TTCLIMB), North Star Ambulatory Assessment (NSAA), 6-Minute Walk Test (6MWT), Range of Motion test (ROM), and hand-held myometry (elbow flexors and knee extensors). Exploratory measures of efficacy include PD biomarkers that have previously been shown to be glucocorticoid-responsive in DMD boys and inflammatory bowel disease in children.<sup>31</sup> Moreover, physical functioning, behavior, neuropsychology, and satisfaction with treatment will be measured as exploratory efficacy outcomes using the parent proxy-report of Pediatric Outcomes Data Collection Instrument (PODCI), PARS III, Treatment Satisfaction Questionnaire (TSQM), and Ease of Study Medication Administration Assessment for the study medication suspension, respectively.

***Revised Text:***

The primary efficacy outcome is the Time to Stand (TTSTAND) from the floor (velocity), and comparison will be made between the 6.0 mg/kg/day dose level of vamorolone and the placebo group at Week 24. Multiple secondary and exploratory

752 efficacy outcomes will be measured, including TTSTAND, Time to Run/Walk 10 meters  
753 (TTRW), Time to Climb four stairs (TTCLIMB), North Star Ambulatory Assessment  
754 (NSAA), 6-Minute Walk Test (6MWT), Range of Motion test (ROM), and hand-held  
755 myometry (elbow flexors and knee extensors). Additional exploratory measures of  
756 efficacy include PD biomarkers that have previously been shown to be glucocorticoid-  
757 responsive in DMD boys and inflammatory bowel disease in children.<sup>31</sup> Moreover,  
758 physical functioning, behavior, neuropsychology, and satisfaction with treatment will be  
759 measured as exploratory outcomes using the parent proxy-report of Pediatric Outcomes  
760 Data Collection Instrument (PODCI), PARS III, Treatment Satisfaction Questionnaire  
761 (TSQM), and Ease of Study Medication Administration Assessment for the study  
762 medication suspension, respectively.  
763

764 **Section Changed:**

765 **Section 1.4: Rationale for Study Design, paragraph #6, item #4**

766 ***Original Text:***

- 767
- 768
- 769 4. **Immune suppression.** Glucocorticoids can cause immunosuppression. The  
770 measure of differential lymphocyte percentage can be a biomarker for immune  
771 suppression.

772 ***Revised Text:***

773 none

774 **Section Changed:**

775 **Section 1.5: Overall Benefit/Risk, paragraph #1**

776 ***Original Text:***

777 It is anticipated that the adverse effect profile of the investigational product will be more  
778 favorable than standard of care glucocorticoids in the long term. There were no serious  
779 adverse events (SAEs) reported over the 14-day treatment in the Phase I clinical trial in  
780 healthy adult volunteers, nor in the four cohorts (0.25 mg/kg, 0.75 mg/kg, 2.0 mg/kg, and  
781 6.0 mg/kg) of the Phase IIa study (VBP15-002; 14-day treatment) in boys ages 4 to  
782 <7 years with DMD. There have been a total of 7 SAEs in the Phase II VBP15-003 and  
783  
784  
785

786  
787 VBP15-LTE extension studies in DMD boys: two SAEs of pneumonia in two different  
788 subjects (both subjects receiving vamorolone 0.75 mg/kg/day), one SAE of bilateral  
789 testicular torsion and one SAE of hypoxia in the same subject receiving 6.0 mg/kg/day,  
790 one SAE of influenza associated dehydration in a subject receiving 6.0 mg/kg/day, and  
791 two SAEs of acute myoglobinuria in the same subject receiving 6.0 mg/kg/day. Each of  
792 these SAEs was considered unrelated to study drug, and none of them resulted in  
793 discontinuation from the study. In the Phase I clinical trial in adult volunteers,  
794 vamorolone showed mild elevations of liver enzymes in one subject receiving 20.0 mg/kg  
795 in the fasted state. On the basis of mean GLDH and GGT data, vamorolone at dose  
796 levels up to 6.0 mg/kg/day did not appear to induce liver toxicity over a 24-week  
797 treatment period in the VBP15-003 study. In the VBP15-002 study, after 2 weeks of  
798 treatment, 0 of 11 tested participants who received vamorolone 0.25 mg/kg/day, 0 of 11  
799 tested participants who received vamorolone 0.75 mg/kg/day, 2 of 11 (18.2%) tested  
800 participants who received vamorolone 2 mg/kg/day, and 6 of 10 (60.0%) tested  
801 participants who received vamorolone 6 mg/kg/day had a depressed morning cortisol  
802 (<3.6 µg/dL [100 nmol/L]) consistent with chronic adrenal suppression. In the  
803 VBP15-003 study, after 24 weeks of treatment, 0 of 8 tested participants  
804 (0.25 mg/kg/day), 1 of 12 (8.3%) tested participants (0.75 mg/kg/day), 5 of 12 (41.7%)  
805 tested participants (2.0 mg/kg/day), and 8 of 9 (88.9%) tested participants  
806 (6.0 mg/kg/day) had a depressed morning cortisol (<3.6 µg/dL [100 nM]) consistent with  
807 chronic adrenal suppression. Instructions for detecting adrenal crisis and the  
808 circumstances in which stress dose steroids should be provided will be included in the  
809 Informed Consent Form (ICF) and Manual of Operations, and Investigators should  
810 monitor clinical study participants closely to identify elevations in liver-specific  
811 enzymes.

812 ***Revised Text:***  
813

814 It is anticipated that the adverse effect profile of the investigational product will be more  
815 favorable than standard of care glucocorticoids in the long term. There has been a total  
816 of 11 SAEs in the vamorolone program to date: a total of 4 SAEs in the VBP15-003  
817 study, a total of 3 SAEs in the VBP15-LTE study, a total of 3 SAEs in the VBP15-004

study, and 1 SAE in the VBP15-EAP program. There have been two SAEs of pneumonia in two different subjects (both subjects receiving vamorolone 0.75 mg/kg/day); one SAE of bilateral testicular torsion and one SAE of hypoxia in the same subject receiving 6.0 mg/kg/day; one SAE of influenza associated dehydration in a subject receiving 6.0 mg/kg/day; two SAEs of acute myoglobinemia in the same subject receiving 6.0 mg/kg/day; one SAE of viral gastroenteritis with secondary dehydration in a subject receiving blinded study drug; one SAE of asthma exacerbation in the setting of respiratory syncytial virus and bronchiolitis in a subject receiving vamorolone at either 2.0 mg/kg/day or 6.0 mg/kg/day; one SAE of perforated appendicitis occurring with 30 days after the subject completed the VBP15-004 study, and one SAE of viral gastroenteritis requiring hospitalization for hydration. Each of these SAEs was considered unrelated to study drug, and none of them resulted in discontinuation from the study.

In the Phase I clinical trial in adult volunteers, vamorolone showed mild elevations of liver enzymes in one subject receiving 20.0 mg/kg in the fasted state. One subject participating in VBP15-004 developed an AE of acute cholestatic hepatitis manifested by elevated transaminases, direct bilirubin, ALP and GGT during Treatment Period #1 and after study drug interruption and restart, redeveloped acute cholestatic hepatitis in Treatment Period #2. Unblinding of the treatment assignment for this subject, to facilitate decisions regarding subsequent standard of care corticosteroid therapy, indicated that the subject had been on vamorolone 6.0 mg/kg/day in both Treatment Period #1 and Treatment Period #2.

In the VBP15-002 study, after 2 weeks of treatment, 0 of 11 tested participants who received vamorolone 0.25 mg/kg/day, 0 of 11 tested participants who received vamorolone 0.75 mg/kg/day, 2 of 11 (18.2%) tested participants who received vamorolone 2 mg/kg/day, and 6 of 10 (60.0%) tested participants who received vamorolone 6 mg/kg/day had a depressed morning cortisol (<3.6 µg/dL [100 nmol/L]) consistent with chronic adrenal suppression. In the VBP15-003 study, after 24 weeks of treatment, 0 of 8 tested participants (0.25 mg/kg/day), 1 of 12 (8.3%) tested participants (0.75 mg/kg/day), 5 of 12 (41.7%) tested participants (2.0 mg/kg/day), and 8 of 9 (88.9%)

tested participants (6.0 mg/kg/day) had a depressed morning cortisol (<3.6 µg/dL [100 nM]) consistent with chronic adrenal suppression. Instructions for detecting adrenal crisis and the circumstances in which stress dose steroids should be provided will be included in the Informed Consent Form (ICF) and Manual of Operations, and Investigators should monitor clinical study participants closely to identify elevations in liver-specific enzymes.

**Section Changed:**

**Section 2.2.1: Safety Endpoints, #1, #9, and #12**

***Original Text:***

1. BMI z-score: Comparison of each vamorolone dose level group with the prednisone group in change from baseline to each of the scheduled on-treatment and post-treatment assessment time points.

***Original Text:***

9. Dual-energy x-ray absorptiometry (DXA) scan: Change from baseline to Week 24 and Week 48 in spine BMD, spine BMD z-score, total body BMD, spine and total body bone mass, and total body composition (lean mass, fat mass, fat-free mass, Lean Mass Index, and Fat Mass Index);

***Original Text:***

12. ACTH Stimulation Test: measure of adrenal suppression at Week 24 and Week 48. Adrenal suppression is likely if cortisol levels <18 µg/dL (or 500 nM) 30 or 60 minutes after stimulation with Cosyntropin.

***Revised Text:***

1. BMI z-score: Change from baseline to each of the scheduled on-treatment and post-treatment assessment time points;

***Revised Text:***

9. Dual-energy x-ray absorptiometry (DXA) scan: Change from baseline to Week 24 and Week 48 in spine BMD, total body BMD, spine and total body bone mass, and

total body composition (lean mass, fat mass, fat-free mass, Lean Mass Index, and Fat Mass Index);

***Revised Text:***

12. ACTH Stimulation Test: measure of adrenal suppression at Week 24 and Week 48.

Percentage of subjects in each treatment group with cortisol levels <18 µg/dL (or 500 nM) 30 or 60 minutes after stimulation with Cosyntropin.

13. Linear growth velocity: Change from baseline to each of the scheduled on-treatment and post-treatment assessment time points in height percentile for age.

**Section Changed:**

**Section 2.2.1: Safety Endpoints, paragraph #15**

***Original Text:***

none

***Revised Text:***

***Tolerability Endpoint***

1. Premature discontinuations of study treatment due to adverse events.

**Section Changed:**

**Section 2.2.2: Clinical Efficacy Endpoints**

***Original Text:***

***Primary Clinical Efficacy Endpoint***

1. Time to Stand Test (TTSTAND) velocity (rise/second): Comparison of each vamorolone dose level group versus the placebo group in change from baseline to the Week 24 assessment.

***Secondary Efficacy Endpoints***

1. Change from baseline to each of the scheduled study assessment time points for each treatment group up to Week 48, with comparison of each vamorolone dose level group versus the placebo group at each of the scheduled study assessment time points up to and including Week 24 for:

- Time to Stand Test (TTSTAND) velocity (rise/second) (other than Week 24);
  - Time to Climb (4 Steps) Test (TTCLIMB) velocity (tasks/second);
  - Time to Run/Walk Test (TTRW) velocity (meters/second) to complete 10 meters of a 14 meter course;
  - Total distance traveled, in meters, in completing the Six-minute Walk Test (6MWT);
  - North Star Ambulatory Assessment (NSAA);
  - Hand-held myometry (elbow flexors and knee extensors); and
  - Range of motion in the ankles (ROM).
2. Change from baseline with comparison of each vamorolone dose level group versus the prednisone group at each of the scheduled study assessment time points up to and including Week 24 for:
- Total distance traveled, in meters, in completing the Six-minute Walk Test (6MWT).

***Revised Text:***

***Primary Clinical Efficacy Endpoint***

1. Time to Stand Test (TTSTAND) velocity (rise/second): Comparison of the vamorolone 6.0 mg/kg/day dose level group versus the placebo group in change from baseline to the Week 24 assessment.

***Secondary Efficacy Endpoints***

1. Change from baseline to Week 24 for the following comparisons:
  - TTSTAND velocity, vamorolone 2.0 mg/kg/day vs placebo
  - 6 Minute Walk Test (6MWT) meters walked, vamorolone 6.0 mg/kg/day vs. placebo
  - 6 Minute Walk Test (6MWT) meters walked, vamorolone 2.0 mg/kg/day vs. placebo



- Time to Run/Walk (TTRW) 10 meters velocity, vamorolone 6.0 mg/kg/day vs. placebo
  - Time to Run/Walk (TTRW) 10 meters velocity, vamorolone 2.0 mg/kg/day vs. placebo
  - 6MWT meters walked, vamorolone 6.0 mg/kg/day vs. prednisone
  - 6MWT meters walked, vamorolone 2.0 mg/kg/day vs. prednisone
2. Change from baseline to each of the scheduled study assessment time points for each treatment group up to Week 48 for:
- Time to Stand Test (TTSTAND) velocity (rise/second);
  - Time to Climb (4 Steps) Test (TTCLIMB) velocity (tasks/second);
  - Time to Run/Walk Test (TTRW) velocity (meters/second) to complete 10 meters of a 14 meter course;
  - Total distance traveled, in meters, in completing the Six-minute Walk Test (6MWT);
  - North Star Ambulatory Assessment (NSAA);
  - Hand-held myometry (elbow flexors and knee extensors); and
  - Range of motion in the ankles (ROM).

***Exploratory Efficacy Endpoints***

1. Change from baseline to each of the scheduled study assessment time points up to and including Week 24 for the following comparisons:
- TTSTAND velocity, vamorolone 6.0 mg/kg/day vs placebo (Week 6 and 12 only)
  - TTSTAND velocity, vamorolone 2.0 mg/kg/day vs placebo (Week 6 and 12 only)
  - 6 Minute Walk Test (6MWT) meters walked, vamorolone 6.0 mg/kg/day vs. placebo (Week 12 only)

- 6 Minute Walk Test (6MWT) meters walked, vamorolone 2.0 mg/kg/day vs. placebo (Week 12 only)
- Time to Run/Walk (TTRW) 10 meters velocity, vamorolone 6.0 mg/kg/day vs. placebo (Week 12 only)
- Time to Run/Walk (TTRW) 10 meters velocity, vamorolone 2.0 mg/kg/day vs. placebo (Week 12 only)
- 6MWT meters walked, vamorolone 6.0 mg/kg/day vs. prednisone (Week 12 only)
- 6MWT meters walked, vamorolone 2.0 mg/kg/day vs. prednisone (Week 12 only)
- NSAA total score, vamorolone 6.0 mg/kg/day vs. placebo
- NSAA total score, vamorolone 2.0 mg/kg/day vs. placebo
- Hand-held Myometry knee extensors, vamorolone 6.0 mg/kg/day vs. placebo
- Hand-held Myometry knee extensors, vamorolone 2.0 mg/kg/day vs. placebo
- Hand-held Myometry elbow extensors, vamorolone 6.0 mg/kg/day vs. placebo
- Hand-held Myometry elbow extensors, vamorolone 2.0 mg/kg/day vs. placebo
- TTCLIMB velocity, vamorolone 6.0 mg/kg/day vs. placebo
- TTCLIMB velocity, vamorolone 2.0 mg/kg/day vs. placebo
- ROM in the ankles, vamorolone 6.0 mg/kg/day vs. placebo
- ROM in the ankles, vamorolone 2.0 mg/kg/day vs. placebo

**Section Changed:**

**Section 2.2.3: Exploratory Endpoints, #3 and #4**

***Original Text:***

***2.2.3 Exploratory Endpoints***

- 015
- 016
- 017
- 018
- 019
- 020
- 021
3. Behavioral changes (PARS III): Comparison of each vamorolone dose level group to the prednisone group for change from baseline to each of the scheduled study assessment time points up to the Week 24 assessment; comparison of each treatment group for change from baseline to the Week 48 assessment;
  4. Ease of study medication administration assessed at each of the scheduled study assessment time points;

022  
***Revised Text:***

023  
024  
***2.2.3 Additional Exploratory Endpoints***

- 025
- 026
- 027
- 028
- 029
- 030
- 031
3. Behavioral changes (PARS III): Comparison of each vamorolone dose level group to the prednisone group and to the placebo group for change from baseline to each of the scheduled study assessment time points up to the Week 24 assessment; comparison of each treatment group for change from baseline to the Week 48 assessment;
  4. Ease of study medication administration (Question 1 only: tablet vs liquid) assessed at each of the scheduled study assessment time points;

032  
**Section Changed:**

033  
034  
**Section 2.2.4: Pharmacodynamic Endpoints, #1b and #1d**

035  
036  
***Original Text:***

037  
***2.2.4 Exploratory Endpoints***

- 038
- 039
- 040
- 041
- 042
- 043
- 044
- b. Bone turnover. Measures of serum osteocalcin are reflective of bone formation, and measures of serum CTX1 are reflective of bone reabsorption. Ratios of osteocalcin and CTX1 predict later clinical safety concerns of osteopenia and bone fragility.
  - d. Immune suppression. Glucocorticoids can cause immunosuppression. Measure of differential lymphocyte percentage can be a biomarker for immune suppression.

045  
***Revised Text:***

046  
***2.2.4 Exploratory Endpoints***

- b. Bone turnover. Measures of serum osteocalcin are reflective of bone formation, and measures of serum CTX1 are reflective of bone reabsorption. Levels of osteocalcin and CTX1 predict later clinical safety concerns of osteopenia and bone fragility.

**Section Changed:**

**Section 5.4: Rationale for Dose Selection, paragraph #5**

***Original Text:***

Vamorolone at doses of 0.25 mg/kg/day, 0.75 mg/kg/day, 2.0 mg/kg/day and 6.0 mg/kg/day has been demonstrated to be safe and well-tolerated in a 2-week Phase IIa study (VBP15-002) in 4 to <7 years DMD boys. The safety of these four doses continued to be studied in the 24-week Phase II extension study (VBP15-003) in 4 to 7 year-old DMD boys, and continues to be studied in the ongoing VBP15-LTE long-term extension study. There were a total of 4 SAEs in the Phase II VBP15-003 study and three SAEs to date in the VBP15-LTE extension study: two SAEs of pneumonia in two different subjects (both subjects receiving vamorolone 0.75 mg/kg/day), one SAE of bilateral testicular torsion and one SAE of hypoxia in the same subject receiving 6.0 mg/kg/day, one SAE of influenza associated dehydration in a subject receiving 6.0 mg/kg/day, and two SAEs of acute myoglobinuria in the same subject receiving 6.0 mg/kg/day. Each of these SAEs was considered unrelated to study drug, and none of them resulted in discontinuation from the study.- One subject receiving vamorolone 6.0 mg/kg in the Phase II extension study (VBP15-003) who had an incidental early morning cortisol drawn following an AE of presyncope had evidence of adrenal suppression. In the VBP15-003 study, after 24 weeks of treatment, 0 of 8 tested participants (0.25 mg/kg/day), 1 of 12 (8.3%) tested participants (0.75 mg/kg/day), 5 of 12 (41.7%) tested participants (2.0 mg/kg/day), and 8 of 9 (88.9%) tested participants (6.0 mg/kg/day) had a depressed morning cortisol (<3.6 µg/dL [100 nM]) consistent with chronic adrenal suppression.<sup>29</sup> Thus, based on the available data in the Phase I and Phase II studies regarding the safety signal of suppression of the adrenal axis, the possibility of adrenal suppression is present in subjects at the 2.0 and 6.0 mg/kg/day dose levels.

***Revised Text:***

Vamorolone at doses of 0.25 mg/kg/day, 0.75 mg/kg/day, 2.0 mg/kg/day and 6.0 mg/kg/day has been demonstrated to be safe and well-tolerated in a 2-week Phase IIa study (VBP15-002) in 4 to <7 years DMD boys. - There has been a total of 11 SAEs in the vamorolone program to date: a total of 4 SAEs in the VBP15-003 study, a total of 3 SAEs in the VBP15-LTE study, a total of 3 SAEs in the VBP15-004 study, and 1 SAE in the VBP15-EAP program. There have been two SAEs of pneumonia in two different subjects (both subjects receiving vamorolone 0.75 mg/kg/day); one SAE of bilateral testicular torsion and one SAE of hypoxia in the same subject receiving 6.0 mg/kg/day; one SAE of influenza associated dehydration in a subject receiving 6.0 mg/kg/day; two SAEs of acute myoglobulinemia in the same subject receiving 6.0 mg/kg/day; one SAE of viral gastroenteritis with secondary dehydration in a subject receiving blinded study drug; one SAE of asthma exacerbation in the setting of respiratory syncytial virus and bronchiolitis in a subject receiving vamorolone at either 2.0 mg/kg/day or 6.0 mg/kg/day; one SAE of perforated appendicitis occurring with 30 days after the subject completed the VBP15-004 study, and one SAE of viral gastroenteritis requiring hospitalization for hydration. Each of these SAEs was considered unrelated to study drug, and none of them resulted in discontinuation from the study. One subject receiving vamorolone 6.0 mg/kg in the Phase II extension study (VBP15-003) who had an incidental early morning cortisol drawn following an AE of presyncope had evidence of adrenal suppression. In the VBP15-003 study, after 24 weeks of treatment, 0 of 8 tested participants (0.25 mg/kg/day), 1 of 12 (8.3%) tested participants (0.75 mg/kg/day), 5 of 12 (41.7%) tested participants (2.0 mg/kg/day), and 8 of 9 (88.9%) tested participants (6.0 mg/kg/day) had a depressed morning cortisol (<3.6 µg/dL [100 nM]) consistent with chronic adrenal suppression.<sup>29</sup> Thus, based on the available data in the Phase I and Phase II studies regarding the safety signal of suppression of the adrenal axis, the possibility of adrenal suppression is present in subjects at the 2.0 and 6.0 mg/kg/day dose levels.

**Section Changed:**

**Section 7.1.1: Genetic Modifiers of DMD, paragraph #4**

***Original Text:***

none

***Revised Text:***

Results will be presented in an addendum report.

**Section Changed:**

**Section 7.2.6: Pharmacodynamic Biomarker Panel, paragraphs #1 and #2**

***Original Text:***

Blood samples will be collected to explore the effect of vamorolone on biomarkers associated with glucocorticoid safety concerns (secondary outcomes for adrenal suppression, insulin resistance, bone turnover and immune suppression), as listed in **Table 19**.

Blood samples will be collected pre-dose at the Day 1 and Weeks 12, 24, 28, 40, and 48 Visits, and at the final Week 52 Dose-tapering Period Visit for analysis of biomarkers for secondary outcome measures of adrenal suppression, bone turnover, and insulin resistance. Approximately 2 mL of blood will be collected for the PD biomarker panel (osteocalcin, P1NP, and CTX bone turnover markers) at each scheduled collection time point; blood samples for analysis of morning cortisol levels (adrenal suppression biomarker) and fasting glucose and insulin (insulin resistance biomarkers) will be collected as part of the clinical laboratory tests and require no additional blood volume. All samples will be collected after the subject has fasted for  $\geq 6$  hours and prior to administration of the daily dose of study medication at dosing visits. Blood samples for analysis of immune suppression (differential lymphocyte percentage) will be collected as part of the clinical laboratory tests (see **Section 7.2.4**). Blood remaining from collected samples not needed for protocol-specified analyses at each of these time points may be stored for future exploratory biomarker studies for aspects of safety and efficacy. These remaining blood samples may be released to scientists worldwide for research purposes, including research on biomarkers in DMD. Any released samples will have no identifying subject information.

***Revised Text:***

Blood samples will be collected to explore the effect of vamorolone on biomarkers associated with glucocorticoid safety concerns (secondary outcomes for adrenal suppression, insulin resistance, and bone turnover), as listed in **Table 19**.

Blood samples will be collected pre-dose at the Day 1 and Weeks 12, 24, 28, 40, and 48 Visits, and at the final Week 52 Dose-tapering Period Visit for analysis of biomarkers for secondary outcome measures of adrenal suppression, bone turnover, and insulin resistance. Approximately 2 mL of blood will be collected for the PD biomarker panel (osteocalcin, P1NP, and CTX bone turnover markers) at each scheduled collection time point; blood samples for analysis of morning cortisol levels (adrenal suppression biomarker) and fasting glucose and insulin (insulin resistance biomarkers) will be collected as part of the clinical laboratory tests and require no additional blood volume. All samples will be collected after the subject has fasted for  $\geq 6$  hours and prior to administration of the daily dose of study medication at dosing visits. Blood remaining from collected samples not needed for protocol-specified analyses at each of these time points may be stored for future exploratory biomarker studies for aspects of safety and efficacy. These remaining blood samples may be released to scientists worldwide for research purposes, including research on biomarkers in DMD. Any released samples will have no identifying subject information.

**Section Changed:**

**Section 7.2.6: Pharmacodynamic Biomarker Panel, Table 19**

***Original Text:***

**Table 21. Pharmacodynamic Biomarkers – Secondary Safety Outcomes**

| <b>Adrenal Suppression</b>         |
|------------------------------------|
| Cortisol - morning                 |
| <b>Insulin Resistance</b>          |
| Glucose – fasting                  |
| Insulin - fasting                  |
| <b>Bone Turnover</b>               |
| Osteocalcin                        |
| CTX1                               |
| P1NP                               |
| <b>Immune Suppression</b>          |
| Differential lymphocyte percentage |

***Revised Text:***

**Table 22. Pharmacodynamic Biomarkers – Secondary Safety Outcomes**

| <b>Adrenal Suppression</b> |
|----------------------------|
| Cortisol - morning         |
| <b>Insulin Resistance</b>  |
| Glucose – fasting          |
| Insulin - fasting          |
| <b>Bone Turnover</b>       |
| Osteocalcin                |
| CTX1                       |
| P1NP                       |

**Section Changed:**

**Section 7.2.13: Bone Health and DXA Scan (total body and spine), paragraph #2**

***Original Text:***

Antero-posterior spine (L1-L4) and total body (without head) bone mineral density (BMD) by DXA scan will be collected. DXA quality control will be performed as described in the Manual of Operations. DXA scans will be analyzed centrally by a certified medical radiation technologist at Children’s Hospital of Ottawa in Ottawa, Canada, and then age-specific z-scores will be generated in order to chart the differences in the change in BMD z-scores among the different groups participating in this trial. The



187  
188 Screening result will represent a baseline assessment for long-term follow up. Additional  
189 DXA scanning may be arranged if clinically indicated throughout the study.

190 ***Revised Text:***

191 Antero-posterior spine (L1-L4) and total body (without head) bone mineral density  
192 (BMD) by DXA scan will be collected. DXA quality control will be performed as  
193 described in the Manual of Operations. DXA scans will be analyzed centrally by a  
194 certified medical radiation technologist at Children's Hospital of Ottawa in Ottawa,  
195 Canada. The Screening result will represent a baseline assessment for long-term follow  
196 up. Additional DXA scanning may be arranged if clinically indicated throughout the  
197 study.

198 **Section Changed:**

199  
200 **Section 7.2.14: Spine X-rays, paragraph #2**

201  
202 ***Original Text:***

203 none

204  
205 ***Revised Text:***

206 Spine x-ray data will be analyzed in an addendum report.

207  
208 **Section Changed:**

209  
210 **Section 7.5.6: Serious Adverse Events, paragraph #9**

211  
212 ***Original Text:***

213 none

214  
215 ***Revised Text:***

216 Hospital admissions scheduled prior to the study are not considered SAEs unless the  
217 hospitalization is prolonged due to an adverse event. Planned admissions as part of the  
218 study, hospitalizations for scheduled treatment of a preexisting condition that has not  
219 worsened, and hospitalization for an elective procedure are not considered SAEs.  
220 Hospitalizations for fewer than 24 hours and emergency room/department visits are not  
221 considered SAEs.

**Section Changed:**

**Section 10.3: Analysis Populations**

***Original Text:***

Three populations will be defined for data analysis: the Safety Population, the modified Intent-to-Treat Population, and the Pharmacokinetic Population.

***Revised Text:***

Four populations will be defined for data analysis: the Safety Population, the modified Intent-to-Treat Population, the Per Protocol Population (PPP), and the Pharmacokinetic Population.

**Section Changed:**

**Section 10.3.3: Pharmacokinetic (PK) Population**

***Original Text:***

***10.3.3 Pharmacokinetic (PK) Population***

All subjects who receive at least one dose of vamorolone study medication and have sufficient data for PK analysis will be included in the PK Population.

***Revised Text:***

***10.3.3 Per Protocol Population***

The Per Protocol Population (PPP) will be those subjects in the mITT Population who had no major protocol deviations and will be the secondary analysis population for analysis of the efficacy data. The PPP will also exclude some subjects because of missed assessments due to the COVID-19 pandemic. Exclusion of subjects from the PPP will be made on a subject-by-subject basis prior to database hard lock

***10.3.4 Pharmacokinetic (PK) Population***

All subjects who receive at least one dose of vamorolone study medication and have sufficient data for PK analysis will be included in the PK Population.

**Section Changed:**

**Section 10.9.3: Subject Disposition, Demographics, and Baseline Characteristics, paragraph #2**

***Original Text:***

Subject demographics (e.g., age, race, and ethnicity) and baseline characteristics (e.g., height, weight, and months/years since DMD diagnosis) will be summarized descriptively by treatment group and overall, per analysis population. In addition, tables will be presented according to age stratification. Baseline characteristics between groups presented in these summary tables will be reviewed for any clinically relevant differences among the treatment groups or age stratification groups, and may be accounted for in the statistical models for the endpoints.

***Revised Text:***

Subject demographics (e.g., age, race, and ethnicity) and baseline characteristics (e.g., height, weight, and months/years since DMD diagnosis) will be summarized descriptively by treatment group and overall, per analysis population. Baseline characteristics between groups presented in these summary tables will be reviewed for any clinically relevant differences among the treatment groups, and may be accounted for in the statistical models for the endpoints.

**Section Changed:**

**Section 10.9.4: Efficacy Analyses**

***Original Text:***

The evaluations of clinical efficacy will be performed using the mITT Population. Analyses will be done as per randomized treatment.

All efficacy will be summarized and listed. Where considered relevant, plots will be created.

The primary efficacy outcome is the Time to Stand (TTSTAND) from supine (velocity). Secondary efficacy outcomes are the NSAA assessment, Time to Climb four stairs (TTCLIMB), Time to Run/Walk 10 meters (TTRW) the distance walked in 6 minutes (6MWT), hand-held myometry (elbow flexors and knee extensors), and ROM. TTSTAND, TTCLIMB, and TTRW will be analyzed using raw scores and velocity.

286  
287 The primary efficacy outcome TTSTAND (velocity) change from baseline to Week 24  
288 will be compared between each of the two different vamorolone dose groups and the  
289 placebo group using a restricted maximum likelihood (REML)-based mixed model for  
290 repeated measures (MMRM). This model includes fixed effects for treatment  
291 (vamorolone 2.0 mg/kg/day, vamorolone 6.0 mg/kg/day, prednisone 0.75 mg/kg/day, and  
292 placebo), week, baseline TTSTAND, age group (per stratification), and the treatment-by-  
293 week interaction. Study week will be included in the model as a categorical variable  
294 (Weeks 6, 12, and 24) along with the treatment-by-week interaction. Within this model,  
295 pairwise comparisons (using least squares [LS] mean contrasts) will be made to compare  
296 TTSTAND at 24 weeks for each vamorolone dose level with placebo separately (primary  
297 efficacy outcome), for each vamorolone dose level with prednisone separately (secondary  
298 analysis), and for the high vamorolone dose level with the low vamorolone dose level  
299 (secondary analysis). Treatments will also be compared at other weeks as secondary  
300 analyses. An unstructured covariance matrix will be used, and underlying modelling  
301 assumptions will be checked. If differences between baseline characteristics exist  
302 between the three treatment groups in this comparison, it will be investigated if  
303 adjustment for these characteristics is clinically relevant and necessary. The secondary  
304 outcome measures will be compared using similar models. Full details will be provided  
305 in the SAP.

306 The following sensitivity or supportive analyses will be performed (see SAP for full  
307 details) for the primary efficacy and secondary efficacy endpoints:

- 308 • Multiple imputations using MCMC methods for missing data;
- 309 • Multiple imputations using a Control-based Pattern-Mixture Model for missing  
310 data.

311 Subjects who are randomized to receive vamorolone 2.0 mg/kg/day or vamorolone  
312 6.0 mg/kg/day for both treatment periods will have TTSTAND velocity change from  
313 baseline data captured over 48 weeks compared with untreated DMD historical control  
314 data. Full details will be provided in the SAP.

***Revised Text:***

The evaluations of clinical efficacy will be performed using the mITT Population and PPP. Analyses will be done as per randomized treatment.

All efficacy will be summarized and listed. Where considered relevant, plots will be created.

The primary efficacy outcome is Time to Stand (TTSTAND) from supine (velocity), comparison of vamorolone 6.0 mg/kg/day vs. placebo. Secondary and exploratory efficacy outcomes are TTSTAND (velocity), comparison of vamorolone 2.0 mg/kg/day vs. placebo; the NSAA assessment; Time to Climb four stairs (TTCLIMB) (velocity); Time to Run/Walk 10 meters (TTRW) (velocity); the distance walked in 6 minutes (6MWT); hand-held myometry (elbow flexors and knee extensors); and ROM.

The primary efficacy outcome TTSTAND (velocity) change from baseline to Week 24 will be compared between the 6.0 mg/kg/day vamorolone dose group and the placebo group using a restricted maximum likelihood (REML)-based mixed model for repeated measures (MMRM). This model includes fixed effects for treatment (vamorolone 2.0 mg/kg/day, vamorolone 6.0 mg/kg/day, prednisone 0.75 mg/kg/day, and placebo), week, baseline TTSTAND, age group (per stratification), and the treatment-by-week interaction. Study week will be included in the model as a categorical variable (Weeks 6, 12, and 24) along with the treatment-by-week interaction. Within this model, pairwise comparisons (using least squares [LS] mean contrasts) will be made to compare TTSTAND velocity at 24 weeks for the vamorolone 6.0 mg/kg/day dose level with placebo (primary efficacy outcome).

For secondary outcomes, the same models will be used as for the primary outcome (REML-based MMRM including fixed effects for treatment [vamorolone 2.0 mg/kg/day, vamorolone 6.0 mg/kg/day, prednisone 0.75 mg/kg/day, and placebo], age group [ $<6$  years;  $\geq 6$  years], week, baseline, and treatment-by-week interaction).

An unstructured covariance matrix will be used, and underlying modelling assumptions will be checked. If differences between baseline characteristics exist between the treatment groups, it will be investigated if adjustment for these characteristics is clinically

345 relevant and necessary. The secondary outcome measures will be compared using similar  
346 models. Full details will be provided in the SAP.  
347

348 The following sensitivity analyses will be performed (see SAP for full details) for the  
349 primary efficacy and secondary efficacy endpoints:

- 350 • Multiple imputations using MCMC methods for missing data;
- 351 • Multiple imputations using a Control-based Pattern-Mixture Model for missing  
352 data.

353 Additional sensitivity analyses will be performed to assess the impact of COVID-19 on  
354 the primary endpoint. Supportive analyses will also be performed on the primary  
355 endpoint. Full details will be provided in the SAP.

356 Subjects who are randomized to receive vamorolone 2.0 mg/kg/day or vamorolone  
357 6.0 mg/kg/day for both treatment periods will have TTSTAND velocity change from  
358 baseline data captured over 48 weeks compared with untreated DMD historical control  
359 data. Full details will be provided in the SAP.

360 **Section Changed:**  
361

362 **Section 10.9.5: Safety Analyses, paragraphs #3-5**  
363

364 ***Original Text:***

365 Safety data will include BMI, weight, vital signs, 2D-echocardiogram, DXA scan, spine  
366 X-ray, eye examination results, and ACTH Stimulation Test results, and ECG results, and  
367 these will be presented using descriptive statistics. Safety laboratory data will be  
368 summarized using descriptive statistics, and out-of-range values will be listed. For safety  
369 analyses, the vamorolone doses will be compared to prednisone.

370 In Treatment Period #1, BMI z-score change from baseline data captured over 24 weeks  
371 will be compared for subjects who are randomized to receive vamorolone 2.0 mg/kg/day  
372 or vamorolone 6.0 mg/kg/day vs. subjects randomized to receive prednisone. The same  
373 MMRM that is used for the primary efficacy analysis will be used for BMI z-score. The  
374 test for statistical significance will be performed at the 0.05 level. Subjects who are  
375 randomized to receive vamorolone 2.0 mg/kg/day or vamorolone 6.0 mg/kg/day for both

376  
377 treatment periods will have their BMI z-score change from baseline data captured over 48  
378 weeks compared with prednisone-treated DMD historical control data. Full details will  
379 be provided in the SAP.

380 Adverse events will be coded using the Medical Dictionary for Regulatory Activities  
381 (MedDRA), version 20. The incidence of AEs will be summarized overall and by  
382 treatment group, SOC and preferred term; treatment group, SOC, preferred term, and  
383 intensity (CTCAE v 4.03 grade); and treatment group, SOC, preferred term, and  
384 relationship to study drug. Additional AE analyses will be at the subject level: the  
385 number of subjects who had any AE, the distribution of number of AEs per subject within  
386 a treatment group, worst intensity in a subject within a treatment group, highest level of  
387 relationship to study treatment for each subject within a treatment group.

388 ***Revised Text:***

389 Safety data will include BMI, weight, vital signs, 2D-echocardiogram, DXA scan, spine  
390 X-ray, eye examination results, and ACTH Stimulation Test results, and ECG results, and  
391 these will be presented using descriptive statistics. Safety laboratory data will be  
392 summarized using descriptive statistics, and out-of-range values will be listed. For safety  
393 analyses, the vamorolone doses during Treatment Period #1 will be compared to  
394 prednisone, as specified in the SAP.

395 In Treatment Period #1, BMI z-score change from baseline results will be compared  
396 between treatment groups using an REML-based MMRM analysis with treatment group,  
397 week of the visit, and the treatment-by-week interaction as factors, and baseline BMI z-  
398 score and age group as a covariate. Week will be included in the model as a categorical  
399 variable (Week 12 and 24) along with the treatment-by-week interaction. An  
400 unstructured within-subject covariance matrix will be used. If this analysis fails to  
401 converge, Akaike's information criterion will be used to select the best covariance  
402 structure from compound symmetry and autoregressive-1 (AR(1)). The Kenward-Roger  
403 approximation will be used to estimate denominator degrees of freedom.

404 Change from baseline in all continuous clinical laboratory test results will be tested using  
405 one sample t-tests with p-values presented along with the descriptive statistics at each

406  
407 assessment visit within each treatment group (note that pharmacodynamic biomarkers -  
408 CK for efficacy, fasting glucose and insulin for insulin resistance, and GLDH for safety -  
409 will be of special interest).

410 Adverse events will be coded using the Medical Dictionary for Regulatory Activities  
411 (MedDRA), version 20. The incidence of AEs will be summarized overall and by  
412 treatment group, SOC and preferred term; treatment group, SOC, preferred term, and  
413 intensity (CTCAE v 4.03 grade); and treatment group, SOC, preferred term, and  
414 relationship to study drug. Additional AE analyses will be at the subject level: the  
415 number of subjects who had any AE, the distribution of number of AEs per subject within  
416 a treatment group, worst intensity in a subject within a treatment group, highest level of  
417 relationship to study treatment for each subject within a treatment group. Adverse events  
418 associated with suicidality and abuse potential will be listed. Full details will be provided  
419 in the SAP.



# VBP15-004-A4 (Version 1.4) FINAL 28AUG2020

Final Audit Report

2020-09-02

|                 |                                              |
|-----------------|----------------------------------------------|
| Created:        | 2020-08-28                                   |
| By:             | Jesse Damsker (jesse.damsker@reveragen.com)  |
| Status:         | Signed                                       |
| Transaction ID: | CBJCHBCAABAAbFhYlqGUrdWv25eDMyi7p3bM08_NC-eU |

## "VBP15-004-A4 (Version 1.4) FINAL 28AUG2020" History

-  Document created by Jesse Damsker (jesse.damsker@reveragen.com)  
2020-08-28 - 1:40:35 PM GMT - IP address: 69.243.53.236
-  Document emailed to Eric Hoffman (ericphoffman@gmail.com) for signature  
2020-08-28 - 1:43:14 PM GMT
-  Email viewed by Eric Hoffman (ericphoffman@gmail.com)  
2020-08-28 - 2:03:26 PM GMT - IP address: 66.102.8.123
-  Eric Hoffman (ericphoffman@gmail.com) entered valid password.  
2020-08-28 - 2:03:33 PM GMT
-  Document e-signed by Eric Hoffman (ericphoffman@gmail.com)  
Signature Date: 2020-08-28 - 2:03:52 PM GMT - Time Source: server- IP address: 98.252.53.95
-  Document emailed to Laurel J. Mengle-Gaw (camden@camdengroup.com) for signature  
2020-08-28 - 2:03:55 PM GMT
-  Email viewed by Laurel J. Mengle-Gaw (camden@camdengroup.com)  
2020-08-28 - 3:15:48 PM GMT - IP address: 24.107.91.40
-  Laurel J. Mengle-Gaw (camden@camdengroup.com) entered valid password.  
2020-08-28 - 3:19:04 PM GMT
-  Document e-signed by Laurel J. Mengle-Gaw (camden@camdengroup.com)  
Signature Date: 2020-08-28 - 3:20:09 PM GMT - Time Source: server- IP address: 24.107.91.40
-  Document emailed to Benjamin D. Schwartz (bdschw@camdengroup.com) for signature  
2020-08-28 - 3:20:12 PM GMT

462  
463  
464  
465  
466  
467  
468  
469  
470  
471  
472  
473  
474  
475  
476  
477  
478  
479  
480  
481  
482  
483  
484  
485  
486  
487  
488  
489  
490  
491  
492  
493  
494  
495  
496  
497  
498  
499  
500  
501  
502  
503  
504  
505  
506  
507  
508  
509  
510

 Email viewed by Benjamin D. Schwartz (bdschw@camdengroup.com)

2020-08-28 - 4:25:33 PM GMT- IP address: 47.24.139.101

 Benjamin D. Schwartz (bdschw@camdengroup.com) entered valid password.

2020-08-28 - 4:25:39 PM GMT

 Document e-signed by Benjamin D. Schwartz (bdschw@camdengroup.com)

Signature Date: 2020-08-28 - 4:26:11 PM GMT - Time Source: server- IP address: 47.24.139.101

 Document emailed to Paula R. Clemens (clempr@upmc.edu) for signature

2020-08-28 - 4:26:14 PM GMT

 Email viewed by Paula R. Clemens (clempr@upmc.edu)

2020-08-31 - 1:40:42 PM GMT- IP address: 128.147.28.77

 Paula R. Clemens (clempr@upmc.edu) entered valid password.

2020-08-31 - 1:40:53 PM GMT

 Document e-signed by Paula R. Clemens (clempr@upmc.edu)

Signature Date: 2020-08-31 - 1:42:09 PM GMT - Time Source: server- IP address: 128.147.28.77

 Document emailed to Michela Guglieri (michela.guglieri@newcastle.ac.uk) for signature

2020-08-31 - 1:42:13 PM GMT

 Email viewed by Michela Guglieri (michela.guglieri@newcastle.ac.uk)

2020-08-31 - 4:11:08 PM GMT- IP address: 94.197.121.2

 Michela Guglieri (michela.guglieri@newcastle.ac.uk) entered valid password.

2020-09-02 - 5:29:10 AM GMT

 Document e-signed by Michela Guglieri (michela.guglieri@newcastle.ac.uk)

Signature Date: 2020-09-02 - 5:30:35 AM GMT - Time Source: server- IP address: 2.36.90.79

 Document emailed to Johannes van den Anker (john.vandenanker@reveragen.com) for signature

2020-09-02 - 5:30:39 AM GMT

 Email viewed by Johannes van den Anker (john.vandenanker@reveragen.com)

2020-09-02 - 12:07:38 PM GMT- IP address: 207.96.13.12

 Johannes van den Anker (john.vandenanker@reveragen.com) entered valid password.

2020-09-02 - 12:08:43 PM GMT

 Document e-signed by Johannes van den Anker (john.vandenanker@reveragen.com)

Signature Date: 2020-09-02 - 12:09:30 PM GMT - Time Source: server- IP address: 207.96.13.12

 Document emailed to Mark Jaros (mjaros@summitanalytical.com) for signature

2020-09-02 - 12:09:33 PM GMT

511  
512  
513  
514  
515  
516  
517  
518  
519  
520  
521  
522  
523  
524  
525  
526  
527  
528  
529  
530  
531  
532  
533  
534  
535  
536  
537  
538  
539  
540  
541  
542  
543  
544  
545  
546  
547  
548  
549  
550  
551  
552  
553  
554  
555  
556  
557  
558  
559  
560  
561  
562  
563  
564  
565  
566  
567  
568

 Email viewed by Mark Jaros (mjaros@summitanalytical.com)

2020-09-02 - 12:12:37 PM GMT- IP address: 66.249.80.154

 Mark Jaros (mjaros@summitanalytical.com) entered valid password.

2020-09-02 - 2:27:02 PM GMT

 Document e-signed by Mark Jaros (mjaros@summitanalytical.com)

Signature Date: 2020-09-02 - 2:28:11 PM GMT - Time Source: server- IP address: 23.112.7.89

 Signed document emailed to Michela Guglieri (michela.guglieri@newcastle.ac.uk), Mark Jaros (mjaros@summitanalytical.com), Laurel J. Mengle-Gaw (camden@camdengroup.com), Benjamin D. Schwartz (bdschw@camdengroup.com), and 4 more

2020-09-02 - 2:28:11 PM GMT
