# Supplementary material for: Efficacy and Safety of Vamorolone vs Placebo and Prednisone Among Boys With Duchenne Muscular Dystrophy: A Randomized Clinical Trial
Source: PubMed Central journal article supplement (PMC9425287; doi:10.1001/jamaneurol.2022.2480), 2022-08-29
Supplement: jamaneurol-e222480-s006.pdf [file jamaneurol-e222480-s006.pdf]

1  
2 Protocol Clarification Letter #2 for

3 **VBP15-004**

4 **A Phase IIb Randomized, Double-blind, Parallel Group, Placebo- and Active-controlled**  
5 **Study with Double-Blind Extension to Assess the Efficacy and Safety of Vamorolone in**  
6 **Ambulant Boys with Duchenne Muscular Dystrophy (DMD)**

7 **Clarification Letter Date: 23 March 2020**

8 **CLARIFICATION LETTER**

9 **DATE:** 23 March 2020

10 **TO:** VBP15-004 Investigators

11 **FROM:** VBP15-004 Protocol Team

12 **SUBJECT:** Clarification Letter #2 to the VBP15-004 Protocol (VBP15-004-A3, Version 1.3,  
13 21 May 2019 and VBP15-004-A3.1UK, Version 1.1.3, 21 May 2019) entitled “A Phase IIb  
14 Randomized, Double-blind, Parallel Group, Placebo- and Active-controlled Study with Double-  
15 Blind Extension to Assess the Efficacy and Safety of Vamorolone in Ambulant Boys with  
16 Duchenne Muscular Dystrophy (DMD):”

17 **Study Modifications During the Coronavirus (COVID-19) Pandemic**

18 The following clarification to protocol VBP15-004 (VBP15-004-A3, Version 1.3, 21 May 2019  
19 and VBP15-004-A3.1UK, Version 1.1.3, 21 May 2019) is intended to detail the modifications to  
20 study conduct and site monitoring that will be implemented during the global COVID-19  
21 pandemic. In light of disruptions to subject site access and study staff availability during the  
22 COVID-19 pandemic, certain subject- and site-specific modifications will be made to the study  
23 assessments and procedures as described in the study protocol to ensure the safety of all  
24 participants, continued access to investigational product, and retention of study data integrity.

25 Vamorolone is a first-in-class steroid anti-inflammatory drug being evaluated for ability to  
26 ameliorate Duchenne muscular dystrophy (DMD), and prednisone, a glucocorticoid, is the active  
27 comparator in this study. Glucocorticoid treatment is a standard of care for DMD, and  
28 glucocorticoid dosing interruption during periods of (impending) illness or interruption of the  
29 trial, even if only temporary, could potentially compromise the overall well-being and best  
30 interest of trial participants. It is therefore imperative that subjects who have initiated treatment  
31 with investigational product in this study remain on treatment during the COVID-19 pandemic,  
32 with the safeguard of protocol-specified “stress dosing” of supplemental hydrocortisone as  
33 coverage during times of illness. The measures outlined in this Protocol Clarification Letter aim

34 to avoid study interruption. In addition, since the standard of care for DMD recommends steroid  
35 treatment be initiated prior to functional decline at an average age of 4-8 years in order to avoid  
36 greater risk of rapid deterioration, it would be detrimental to new subjects who have not yet been  
37 screened but wish to enroll in the study, (in compliance with site policy and Investigator  
38 discretion) to deny them entry into the study at sites that are currently allowing site access. For  
39 both subjects who have initiated treatment and new subjects who may be screened for entry into  
40 the study, the availability of off-site (remote) study visits (following an on-site Screening Visit),  
41 minimizes exposure to COVID-19, and further increases the benefit:risk ratio for subjects  
42 participating in this study.

43 This study will continue to be implemented per protocol at all sites and for all subjects, except in  
44 cases where the impact of COVID-19 prevents the performance of scheduled assessments or  
45 procedures as described in the current study protocol. In these cases, scheduled visits should still  
46 be conducted and scheduled assessments should still be performed per protocol, to the extent  
47 possible for each subject at each scheduled visit. At a minimum, the assessments described  
48 below and highlighted in **Table 1** must be performed, though they may be performed remotely,  
49 with the exception of assessments scheduled for the Screening Visit. Furthermore, it is expected  
50 that the study will again be implemented according to the current protocol on a per subject and  
51 per site basis as soon as possible upon alleviation of COVID-19 risks, at the discretion of the  
52 Investigator and study site. In all cases, deviations to the VBP15-004 protocol will be recorded  
53 in the clinical database and described in the Clinical Study Report. The following modifications  
54 will be made on a visit-, subject- or site-specific basis, as needed:

#### 55 **1. Informed Consent for Modifications to Study Procedures**

56 The Investigator or designee will obtain informed re-consent from each subject's  
57 parent(s)/guardian(s) for the study modifications outlined in this Protocol Clarification  
58 Letter and for willingness to continue participation in the study. To enable the  
59 expeditious implementation of the modifications outlined, parent(s)/guardian(s) will be  
60 contacted by telephone or videoconference by site study staff who will present the  
61 modifications as detailed in this Letter, and any questions will be addressed; the  
62 telephone script will be submitted to the IRB/IEC at each site. The site staff will send by  
63 email (or mail, if necessary) to the parent(s)/guardian(s) at the time of the telephone  
64 contact a signature page to be signed by the parent(s)/guardian(s) indicating they  
65 understand the modifications as discussed on the telephone call and are willing to  
66 continue in the study. After the call, the site staff will document in the subject's source  
67 documents that the information was presented, the name of the staff member who  
68 contacted the parent(s)/guardian(s), and the date and time of contact. The  
69 parent(s)/guardian(s) will print out (if sent by email) and sign the signature page, and take  
70 a picture of the signed page on a smart phone and send the picture to the study staff, if  
71 possible. Alternatively, the parent(s)/guardian(s) may scan and email, or mail, the signed  
72 document back to the study site.

73 If applicable, the re-assent of the child will be obtained, if possible in writing by signing  
74 the signature page per individual where a child is intellectually capable of assenting (and  
75 in accordance with local regulations), and with the permission of the  
76 parent(s)/guardian(s), following the procedure above.

77 The signed signature page must be dated and signed by the Investigator or designee and  
78 the signed signature page must be kept by the Investigator in the study subject's file.

79 **2. Visit Schedule and On-site Study Visits:**

80 Subjects should attempt to complete as many of the scheduled study visits as possible at  
81 the study site. For all subjects, the Screening Visit must be performed on-site, and all  
82 scheduled Screening assessments must be completed per protocol, prior to randomization.

83 The study team has determined that the critical study assessments scheduled for Weeks  
84 12, 24, 34, 40, 48 (and 52, if applicable) are necessary to maintain the safety and validity  
85 of the study. These assessments, highlighted in **Table 1**, may be performed remotely,  
86 with the modifications specified below. Every attempt should be made to conduct the  
87 assessments highlighted in **Table 1** at the specified assessment time point.

88 In all cases, for critical safety assessments, intervals between assessments should be no  
89 longer than 12 weeks (see #3 and #7, below). Subjects will be monitored for adverse  
90 events and concomitant medications at each remote visit. Scheduled safety assessments  
91 other than clinical laboratories, adverse events, concomitant medications, subject weight,  
92 and vital signs that cannot be performed on-site will not be performed remotely. The  
93 remote study visits will be conducted by telephone call, or by video call during which  
94 subjects may be observed by study staff if the parent(s)/guardian(s) give consent for a  
95 video interaction with the subject. All data collected remotely will be recorded in the  
96 eCRF.

97 Subject diaries will be dispensed according to the schedule in **Table 1**.

98 Additional remote interactions may be scheduled to assess efficacy (see #6, below).

99 The PODCI, TSQM, PARS III, Ease of Study Medication Administration, and the  
100 Blindedness Assessment will not be administered remotely.

101 **3. Clinical Laboratory Assessments**

102 Blood and urine may be collected and processed for clinical laboratory assessment (i.e.,  
103 hematology, chemistry, urinalysis) either at a local physician's office, local laboratory, or  
104 by a visiting phlebotomist at each of the scheduled visits. Clinical laboratory assessments  
105 should be performed at each scheduled assessment time point, and in all cases at no  
106 longer than 12-week intervals. (This timing is based upon experience in the vamorolone  
107 VBP15-LTE study showing that subject safety is protected when clinical laboratory  
108 assessments are performed at 6-month intervals.) Results will be recorded in the eCRF.  
109 Subjects who are unable to obtain clinical laboratory assessments will be withdrawn from  
110 the study.

111 Blood for pharmacodynamic assessments may be collected if a visiting phlebotomist is  
112 used.

113 Blood for pharmacokinetic and ACTH stimulation assessments will not be collected if a  
114 local physician's office, local laboratory, or visiting phlebotomist is used.

115

116 At a minimum, the following clinical laboratory analytes should be assessed at each  
 117 critical assessment time point (analytes not required are shown in strike-through font):

| <b>Hematology</b>                                                                  |                                                     |
|------------------------------------------------------------------------------------|-----------------------------------------------------|
| Red Blood Cells (RBC)                                                              | Numerical platelet count (estimate not acceptable)  |
| Hemoglobin                                                                         | White Blood Cells (WBC) with differential (percent) |
| Hematocrit                                                                         |                                                     |
| <b>Chemistry</b>                                                                   |                                                     |
| Sodium                                                                             | Total Bilirubin <sup>a</sup>                        |
| Potassium                                                                          | <del>Uric Acid</del>                                |
| Chloride                                                                           | Glucose                                             |
| Calcium                                                                            | <del>Glutamate dehydrogenase (GLDH)</del>           |
| Inorganic Phosphorus                                                               | Alkaline phosphatase (ALP)                          |
| Blood Urea Nitrogen (BUN)                                                          | Gamma Glutamyl Transferase (GGT)                    |
| Creatinine                                                                         | Aspartate aminotransferase (AST)                    |
| Total Protein                                                                      | Alanine aminotransferase (ALT)                      |
| Albumin                                                                            | <del>Creatine kinase (CK)</del>                     |
| Bicarbonate                                                                        | <del>Lipase</del>                                   |
| Lactate Dehydrogenase (LDH)                                                        | <del>Amylase</del>                                  |
| <del>Cystatin C</del>                                                              | Vitamin D <sup>b</sup>                              |
| HbA1c (collect if possible)                                                        |                                                     |
| <b>Lipids (collect if possible)</b>                                                |                                                     |
| Triglycerides                                                                      | Low Density Lipoprotein (LDL)                       |
| Total cholesterol                                                                  | High density Lipoprotein (HDL)                      |
| a. If outside normal range, direct bilirubin will be measured and reported.        |                                                     |
| <b>Urinalysis (including microscopic examination)</b>                              |                                                     |
| <b>Dipstick<sup>a</sup></b>                                                        | <b>Microscopic Analysis</b>                         |
| Protein                                                                            | <del>WBC/hpf</del>                                  |
| Glucose                                                                            | <del>RBC/hpf</del>                                  |
| Ketones                                                                            | <del>Casts</del>                                    |
| pH                                                                                 | <del>Bacteria</del>                                 |
| Leukocyte esterase                                                                 |                                                     |
| Blood                                                                              |                                                     |
| a. A midstream clean-catch urine specimen will be collected for dipstick analysis. |                                                     |

118 **4. Subject Weight**

119 In the event subjects are unable to access the site for on-site study visits, subject weight  
 120 should be recorded by a local physician's office, local laboratory, or visiting healthcare  
 121 professional, optimally at no longer than 12-week intervals. Data will be recorded in the

122 eCRF with notation that the weight was recorded at a remote visit. Investigational  
123 product dose calculation will be based upon the weight (in kg) recorded at the most  
124 recent on-site or remote visit; it is understood that this may be the Screening Visit in all  
125 calculations for some subjects.

## 126 **5. Vital Signs**

127 In the event subjects are unable to access the site for on-site study visits, vital signs may  
128 be recorded by a local physician's office, or visiting healthcare professional, optimally at  
129 no longer than 12-week intervals. Data will be recorded in the eCRF with notation that  
130 the vital signs were recorded at a remote visit.

## 131 **6. Efficacy Assessments**

132 In cases where on-site study visits are not possible for the completion of scheduled  
133 efficacy assessments, the study staff will arrange with the parent(s)/guardian(s) to have  
134 the Time to Stand Test (TTSTAND) conducted remotely by a trained clinical evaluator  
135 (preferably, the site clinical evaluator, whenever possible) by videoconferencing interface  
136 (see [Appendix 1](#) for methodology). Remote assessment of TTSTAND must be  
137 completed at the Baseline, Week 24, and Week 48 assessment time points. If possible,  
138 remote assessment of TTSTAND at Week 12 may also be performed. Results will be  
139 recorded in the eCRF.

140 TTSTAND must be performed per protocol at the on-site Screening Visit (see #2, above).

141 All other scheduled efficacy assessments (i.e., TTRW, TTCLIMB, NSAA, 6MWT, ROM,  
142 Hand-held myometry) will not be collected remotely.

## 143 **7. Collection of Adverse Events and Concomitant Medications**

144 In the event subjects are unable to access the site for on-site study visits, adverse events  
145 and changes to concomitant medications will be reviewed by remote telephone or video  
146 call contact (see #2, above) between the Investigator or trained study staff and the  
147 subject's parent(s)/guardian(s). Data should be collected by site staff interview and  
148 review of diary entries at each remote visit, but in all cases at no longer than 12-week  
149 intervals. Data will be recorded in the eCRF.

## 150 **8. Subject Diaries**

151 In the event subjects cannot access the study site for the study visits at which subject  
152 diaries are scheduled to be dispensed and returned, site staff will email or mail new  
153 diaries to the parent(s)/guardian(s), and the parent(s)/guardian(s) will return completed  
154 diaries to the site by email or mail, at the protocol-specified intervals. Diary entries will  
155 be reviewed with the parents(s)/guardian(s) remotely by telephone or video call at no  
156 longer than 12-week intervals (see #7, above).

## 157 **9. Dispensing of Investigational Product (IP)**

158 Investigational product kits including bottles of vamorolone/placebo liquid suspension  
159 and blister packs of prednisone/placebo tablets will be shipped by the central pharmacy  
160 (Almac Clinical Services) to the clinical site and subsequently assigned using the IXRS  
161 system as currently detailed in the VBP15-004 protocol. In the case(s) where subjects are  
162 unable to come to the site to collect the IP kits, the assigned kit numbers will be couriered

163 from the site directly to the subjects' homes using a courier service, with confirmation of  
164 receipt. These couriered kits will be shipped under temperature conditions that are  
165 supported by the available stability data of the drug product.

166 Investigational Product sufficient for up to 12 weeks of dosing may be dispensed in a  
167 single shipment. Investigational Product will be dispensed at the time of the scheduled  
168 Week 24 Visit for the Transition Period, and Week 48 Visit for subjects entering the  
169 Dose-tapering Period, in lieu of dispensing at the time of the protocol-specified Week 24  
170 Follow-up (F/U) and Week 48 F/U Visits, respectively.

#### 171 **10. Administration of IP**

172 Investigational Product will be administered daily from Study Day 1 through Week 48 or  
173 Week 52 (for subjects participating in the Dose-tapering Period), as specified in the study  
174 protocol. For subjects who are unable to access the site for Week 24 F/U or Week 48  
175 F/U Visits, IP will be dispensed at the Week 24 and Week 48 Visits (see #9, above).  
176 Transition Period dose tapering will begin the day after the remote Week 24 Visit, and IP  
177 tapering during the Dose-tapering Period will begin the day after the Week 48 Visit.

178 Tapering of IP during the Week 25-28 Transition Period and during the Week 49-52  
179 Dose-tapering Period will continue to occur per protocol specifications.

#### 180 **11. IP Compliance Measurement**

181 In cases where study site access is restricted due to COVID-19, subjects will be requested  
182 to retain used bottles and blister packs in a secure location at home, and bring them back  
183 to the site for compliance monitoring when they are able to return to the site for  
184 scheduled visit(s). In the event site access is restricted for the duration of the study,  
185 subjects will be requested to return used IP by mail, as directed by the Sponsor.

186 No interim compliance measurements will be performed at Week 2 and Week 30 for  
187 subjects who are unable to access the study sites.

#### 188 **12. Protocol Deviations**

189 Protocol deviations will continue to be recorded as specified per study protocol, with  
190 important protocol deviations reported by the Investigator to the IRB/IEC and Sponsor or  
191 designee (Coordinating Center) within 24 hours of discovery, or according to local site  
192 requirements (VBP15-004 Protocol, Section 11.3). In addition, all deviations resulting  
193 from the COVID-19 pandemic will be recorded with documented reasons pertaining to  
194 COVID-19.

#### 195 **13. Transition to Vamorolone General Access Program**

196 Subjects who complete the VBP15-004 Week 48 study assessments, as modified in this  
197 Protocol Clarification Letter, may be given access to vamorolone through a general  
198 access program. Subjects must have, at a minimum, clinical laboratory assessments,  
199 TTSTAND, and review of adverse events and concomitant medications at the scheduled  
200 Week 48 assessment time point to be eligible for continued vamorolone treatment in a  
201 general access program. These Week 48 assessments may be performed remotely if they  
202 cannot be performed on-site.

203 Subjects who complete the VBP15-004 study and will enroll directly into a general  
204 access program to continue vamorolone treatment may be discharged from the  
205 VBP15-004 study following completion of the modified Week 48 assessments.

206 **14. Site Monitoring**

207 In accordance with applicable regulations, GCP, and the procedures of the Sponsor or its  
208 designees, the Study Monitor will periodically contact the site to conduct monitoring  
209 reviews. During the COVID-19 pandemic, the extent, nature, and frequency of  
210 monitoring reviews will be largely based on the site's ability to accommodate on-site  
211 monitoring visits, site policies and local regulations regarding remote review of study  
212 data, and COVID-19 related travel restrictions. Additional factors that will be considered  
213 are enrollment rate and data quality at the site. It is expected that most monitoring during  
214 this period will be conducted remotely. Every attempt will be made to closely mirror the  
215 comprehensive nature of an on-site monitoring visit. Due to strict privacy laws in some  
216 countries, the only possible monitoring may be review of data in the electronic database.  
217 Through frequent communications (e.g., letter, e-mail, and telephone), the Study Monitor  
218 will ensure that the investigation continues to be conducted according to protocol and  
219 regulatory requirements.

220 During these contacts, the monitoring activities will include as many of the protocol-  
221 specified activities as possible (VBP15-004 Protocol, Section 11.5).

222 The Investigator will allow the Study Monitor direct access to all relevant documents as  
223 allowable by site policy and local regulations, and allocate his/her time and the time of  
224 his/her staff to the Study Monitor to discuss findings and any relevant issues.

225

226 **Table 1. Schedule of Study Activities**

227 **Assessments highlighted in the Table below are the critical safety and efficacy assessments which must be performed at the**  
 228 **specified assessment time points.**

| Study Day or Week/Visit            | Pretreatment Period |    | Treatment Period #1 |         |         |          |          |          |          | Transition Period | Treatment Period #2 |       |          |          |          |          |        | Dose-tapering Period |          |
|------------------------------------|---------------------|----|---------------------|---------|---------|----------|----------|----------|----------|-------------------|---------------------|-------|----------|----------|----------|----------|--------|----------------------|----------|
|                                    | SCR                 | BL |                     |         |         |          |          |          |          |                   |                     |       |          |          |          |          |        |                      |          |
|                                    | Day                 |    | Week                |         |         |          |          |          |          |                   |                     |       |          |          |          |          |        |                      |          |
|                                    | -33 to -2           | -1 | 1                   | 2 (±1d) | 6 (±3d) | 12 (±1w) | 18 (±1w) | 24 (±1w) | 24 (F/U) | 26                | 28 (±1d)            | 28+1d | 30 (±1d) | 34 (±3d) | 40 (±1w) | 48 (±1w) | 48 F/U | 50                   | 52 (±1d) |
| Informed consent                   | X*                  |    |                     |         |         |          |          |          |          |                   |                     |       |          |          |          |          |        |                      |          |
| Enrollment                         | X*                  |    |                     |         |         |          |          |          |          |                   |                     |       |          |          |          |          |        |                      |          |
| Inclusion/exclusion criteria       | X*                  | X* |                     |         |         |          |          |          |          |                   |                     |       |          |          |          |          |        |                      |          |
| Randomization                      | X*                  |    |                     |         |         |          |          |          |          |                   |                     |       |          |          |          |          |        |                      |          |
| Demographics                       | X*                  |    |                     |         |         |          |          |          |          |                   |                     |       |          |          |          |          |        |                      |          |
| Medical history                    | X*                  |    |                     |         |         |          |          |          |          |                   |                     |       |          |          |          |          |        |                      |          |
| Medication history                 | X*                  | X* |                     |         |         |          |          |          |          |                   |                     |       |          |          |          |          |        |                      |          |
| Physical examination               | X*                  | X  |                     |         | X       | X        | X        | X        |          | X                 |                     |       | X        | X        | X        |          |        |                      | X        |
| Cushingoid features                |                     | X  |                     |         | X       | X        | X        | X        |          | X                 |                     |       | X        | X        | X        |          |        |                      | X        |
| Height                             | X*                  |    |                     |         |         | X        |          | X        |          |                   |                     |       |          | X        |          | X        |        |                      |          |
| Weight                             | X*                  | X  |                     | X       | X       | X        | X        | X        |          | X                 |                     | X     | X        | X        | X        |          |        |                      | X        |
| Vital signs                        | X*                  | X  | X                   | X       | X       | X        | X        | X        |          | X                 |                     | X     | X        | X        | X        |          |        |                      | X        |
| Blood for clinical labs            | X*                  |    | X                   | X       | X       | X*       | X        | X*       |          | X                 |                     |       |          | X*       | X*       | X*       |        |                      | X*       |
| Blood for HbA1c                    | X*                  |    |                     |         |         |          |          | X        |          |                   |                     |       |          |          |          | X        |        |                      |          |
| Blood for vitamin D                | X*                  |    |                     |         |         | X        | X        | X        |          |                   |                     |       | X        |          | X        | X        |        |                      |          |
| Confirmation of varicella immunity | X*                  |    |                     |         |         |          |          |          |          |                   |                     |       |          |          |          |          |        |                      |          |
| Urinalysis                         | X*                  |    | X                   | X       | X       | X*       | X        | X*       |          | X                 |                     | X     | X*       | X*       | X*       |          |        |                      | X*       |
| Blood for serum PD biomarker panel |                     |    | X                   |         |         | X        |          | X        |          | X                 |                     |       |          | X        | X        |          |        |                      | X        |
| Fasting blood for insulin, glucose |                     |    | X                   |         |         | X        |          | X        |          | X                 |                     |       |          | X        | X        |          |        |                      | X        |
| Blood for DNA Testing              |                     |    |                     |         |         |          |          | X        |          |                   |                     |       |          |          |          |          |        |                      |          |
| ACTH Stimulation Test              | X*                  |    |                     |         |         |          |          |          | X        |                   |                     |       |          |          |          |          | X      |                      |          |
| Blood for Plasma PK                |                     |    |                     |         |         |          |          |          |          |                   |                     |       | X        |          |          |          |        |                      |          |



| Study Day or Week/Visit                               | Pretreatment Period |    | Treatment Period #1 |         |         |          |          |          |          | Transition Period | Treatment Period #2 |       |          |          |          |          |        | Dose-tapering Period |          |   |
|-------------------------------------------------------|---------------------|----|---------------------|---------|---------|----------|----------|----------|----------|-------------------|---------------------|-------|----------|----------|----------|----------|--------|----------------------|----------|---|
|                                                       | SCR                 | BL |                     |         |         |          |          |          |          |                   |                     |       |          |          |          |          |        |                      |          |   |
|                                                       | Day                 |    | Week                |         |         |          |          |          |          |                   |                     |       |          |          |          |          |        |                      |          |   |
|                                                       | -33 to -2           | -1 | 1                   | 2 (±1d) | 6 (±3d) | 12 (±1w) | 18 (±1w) | 24 (±1w) | 24 (F/U) | 26                | 28 (±1d)            | 28+1d | 30 (±1d) | 34 (±3d) | 40 (±1w) | 48 (±1w) | 48 F/U | 50                   | 52 (±1d) |   |
| 12-lead ECG                                           | X*                  |    |                     |         |         | X        |          | X        |          |                   |                     |       |          |          | X        | X        |        |                      |          |   |
| 2D-echocardiogram                                     | X*                  |    |                     |         |         |          |          | X        |          |                   |                     |       |          |          |          | X        |        |                      |          |   |
| Eye examination                                       | X*                  |    |                     |         |         |          |          | X        |          |                   |                     |       |          |          |          | X        |        |                      |          |   |
| DXA scan                                              | X*                  |    |                     |         |         |          |          | X        |          |                   |                     |       |          |          |          | X        |        |                      |          |   |
| Spine X-ray                                           | X*                  |    |                     |         |         |          |          | X        |          |                   |                     |       |          |          |          |          |        |                      |          |   |
| Fracture Questionnaire                                | X*                  |    |                     |         |         |          |          | X        |          |                   |                     |       |          |          |          | X        |        |                      |          |   |
| Dispense study medication                             |                     |    | X*                  |         | X*      | X*       | X*       |          | X*       |                   | X*                  |       |          | X*       | X*       |          | X*     |                      |          |   |
| Return study medication/<br>compliance monitoring     |                     |    |                     | X*      | X*      | X*       | X*       | X*       |          |                   | X*                  |       | X*       | X*       | X*       | X*       |        |                      | X*       |   |
| Study medication dosing                               |                     |    | X                   | →       |         |          |          | X        |          |                   |                     | X     | →        |          |          |          | X      |                      |          |   |
| Study medication dose tapering                        |                     |    |                     |         |         |          |          |          | X        | →                 |                     | X     |          |          |          |          | X      | →                    |          | X |
| Telephone call to subject                             |                     |    |                     |         |         |          |          |          |          | X*                |                     |       |          |          |          |          |        | X*                   |          |   |
| Time to Stand Test (TTSTAND)                          | X*                  | X* |                     |         | X       | X        |          | X*       |          |                   |                     |       |          | X        | X        | X*       |        |                      |          |   |
| Time to Climb Test (TTCLIMB)                          | X*                  | X  |                     |         |         | X        |          | X        |          |                   |                     |       |          |          | X        | X        |        |                      |          |   |
| Time to Run/Walk Test (TTRW)                          | X*                  | X  |                     |         |         | X        |          | X        |          |                   |                     |       |          |          | X        | X        |        |                      |          |   |
| NSAA                                                  | X*                  | X  |                     |         |         | X        |          | X        |          |                   |                     |       |          |          | X        | X        |        |                      |          |   |
| Myometry (elbow flexors, knee extensors)              | X*                  | X  |                     |         |         | X        |          | X        |          |                   |                     |       |          |          | X        | X        |        |                      |          |   |
| Six-minute Walk Test (6MWT)                           | X*                  | X  |                     |         |         | X        |          | X        |          |                   |                     |       |          |          | X        | X        |        |                      |          |   |
| Range of Motion (ROM) - ankles                        | X*                  | X  |                     |         |         | X        |          | X        |          |                   |                     |       |          |          | X        | X        |        |                      |          |   |
| Pediatric Outcomes Data Collection Instrument (PODCI) | X*                  |    |                     |         |         |          |          | X        |          |                   |                     |       |          |          |          | X        |        |                      |          |   |

| Study Day or Week/Visit                            | Pretreatment Period |    | Treatment Period #1 |         |         |          |          |          |          | Transition Period | Treatment Period #2 |       |          |          |          |          | Dose-tapering Period |    |          |
|----------------------------------------------------|---------------------|----|---------------------|---------|---------|----------|----------|----------|----------|-------------------|---------------------|-------|----------|----------|----------|----------|----------------------|----|----------|
|                                                    | SCR                 | BL |                     |         |         |          |          |          |          |                   |                     |       |          |          |          |          |                      |    |          |
|                                                    | Day                 |    | Week                |         |         |          |          |          |          |                   |                     |       |          |          |          |          |                      |    |          |
|                                                    | -33 to -2           | -1 | 1                   | 2 (±1d) | 6 (±3d) | 12 (±1w) | 18 (±1w) | 24 (±1w) | 24 (F/U) | 26                | 28 (±1d)            | 28+1d | 30 (±1d) | 34 (±3d) | 40 (±1w) | 48 (±1w) | 48 F/U               | 50 | 52 (±1d) |
| Treatment Satisfaction Questionnaire (TSQM)        |                     |    |                     |         |         |          |          | X        |          |                   |                     |       |          |          |          | X        |                      |    |          |
| PARS III                                           | X*                  |    |                     |         |         | X        |          | X        |          |                   |                     |       |          |          |          | X        |                      |    |          |
| Ease of Study Medication Administration Assessment |                     |    |                     | X       |         | X        |          | X        |          |                   |                     |       | X        |          | X        | X        |                      |    |          |
| Blindedness Assessment                             |                     |    |                     |         |         |          |          | X        |          |                   |                     |       |          |          |          |          |                      |    |          |
| Dispense subject diaries                           |                     |    | X*                  | X*      | X*      | X*       | X*       | X*       |          |                   | X*                  |       | X*       | X*       | X*       | X*       |                      |    |          |
| Return subject diaries                             |                     |    |                     | X*      | X*      | X*       | X*       | X*       | X*       |                   | X*                  |       | X*       | X*       | X*       | X*       | X*                   |    | X        |
| AE/SAE recording                                   | X*                  |    |                     |         |         |          |          |          |          |                   |                     |       |          |          |          |          |                      |    | X*       |
| Concomitant medications                            |                     |    | X*                  |         |         |          |          |          |          |                   |                     |       |          |          |          |          |                      |    | X*       |
| Discharge from study                               |                     |    |                     |         |         |          |          |          |          |                   |                     |       |          |          |          |          | X*                   |    | X*       |

230 **Appendix 1. Remote Assessment of TTSTAND**

**REMOTE STAND FROM SUPINE (TTSTAND)**  
**MANUAL**

**VERSION 1.0 MARCH 20, 2020**

**Vamorolone Phase IIb Study**

**VBP15-004: A Phase IIb Randomized, Double-blind, Parallel Group, Placebo- and Active-controlled Study with Double-Blind Extension to Assess the Efficacy and Safety of Vamorolone in Ambulant Boys with Duchenne Muscular Dystrophy (DMD)**

**Contact Information:**

**Clinical Evaluator Questions:**

**Linda Johnson**

**ljohnson@trinds.com**

**01-916-479-4062**

**Michelle Eagle**

**Michelle.eagle@atominternational.org**

**44-754-005-1001**

**Note:** This manual is to be used to perform the TTSTAND assessment remotely during COVID-19 pandemic.

Reviewed and Approved By:

|                                                                                     |               |
|-------------------------------------------------------------------------------------|---------------|
| 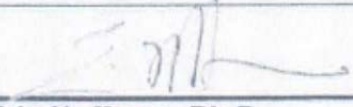   | 23 March 2020 |
| <b>Eric Hoffman, Ph.D.</b><br>Vice President, Research<br>ReveraGen BioPharma, Inc. | <b>DATE</b>   |
|    | 23 MAR 2020   |
| <b>Linda Johnson</b><br>Clinical Evaluator Manager<br>TRINDS, LLC                   | <b>DATE</b>   |
|    | 24 MAR 2020   |
| <b>Michelle Eagle</b><br>Clinical Evaluator Manager<br>ATOM International Limited   | <b>DATE</b>   |

### General Testing Guidelines

- Only Time to Stand is to be performed remotely.
- TTSTAND testing should be performed at approximately the same time of day and after similar pre-test activities and routines.
  1. Site will arrange a testing time that corresponds to normal testing time during research appointments.
  2. The Site Coordinator or other site staff will arrange an appointment for the remote assessment of TTSTAND between the parents and Site CE using Zoom videoconferencing interface.
  3. During the Zoom session, the Site CE will explain the TTSTAND test to the child using the Zoom interface, and then carry out the assessment using video via Zoom, with remote timing of the test by the Site CE.
    - Parents, and site CE will confirm testing surface used during regular research visit, and confirm similar surface in participants home
    - Parents, and site CE will identify one family member/caregiver who will be present and participating in remote home visit. Other family members should not be present per protocol
  4. If Site CE is not available due to institutional employment restrictions during Covid19 limitation, central CE manager /trainer will perform testing.

- The same clinical evaluator (CE) should perform the strength and function testing at each visit if possible.
- If the TTSTAND must be repeated, a 60-second rest period is allowed, unless otherwise stated.
- To avoid bias, the CE should not review any previous strength and function results.
- The strength and function testing environment should be standardized. Since this is a remote visit, it is recognized that the environment may be different. Every effort should be made to use similar surface as in clinic, minimize distractions and limit family members present to essential personnel to assist with testing.
- The participant should wear loose clothing. It is preferable for the participant to wear a short sleeved shirt and shorts. This test is performed without shoes and socks.
- U.S. site only: If the participant has agreed and consented to participate in the companion community-based outcome measure (i.e. Actigraph) protocol, make sure the participant is wearing the actigraph during the strength and function testing.
- If the participant is unable to perform any of the assessments, the test should be skipped and re-introduced at the next visit. Proper documentation should be provided for why the assessment was not completed. Do not enter a score of '0' if test was not completed.
- Make note of start/stop times.
- Complete the timed tests using a manual stopwatch. For all timed tests, the CE will record time to complete the assessment and grade the quality of the movement.
- CEs may provide verbal instruction to improve quality of movement.
- CEs should try to obtain both time and quality assessment in one observation but may have the participant perform test twice, as necessary, to achieve best score in time and grading. For example, if the participant achieves a better time in trial 1 and grading from trial 2, the time for trial 1 and grading from trial 2 are the data points that should be recorded.
- The CE should explain the test item to the participant prior to having him perform the task (examiner is able to demonstrate the task first)
  1. CE will provide verbal instructions for test remotely to both participant and parent/caregiver.
  2. Parent/caregiver will demonstrate test as determined by CE

**During the Session**

1. At start of videochat session, the CE and parents make sure there is enough room to roll over and stand up.
2. CE will provide verbal instructions for test remotely to both participant and parent/caregiver prior to testing
3. Parent/caregiver will demonstrate test if determined necessary by CE to ensure entire test procedure is in view of camera
4. CE will give instructions for participant to obtain starting position via Zoom interface
5. CE will start stopwatch on the word 'go' and stop when participant is standing straight with arms at side.
6. Test will be repeated as necessary per protocol guidelines to obtain best score in time and grading
7. CE will complete source worksheets and add note on source to indicate that remote testing was done. A similar comment will be added to the eCRF.

The participant lays supine on the floor with their hands at their sides. They are asked to stand up as quickly as they can and return to a standing straight position with their hands at their sides. Make sure there is enough room to roll over and stand up. Furniture or external support is only used if needed. Do not use a mat unless absolutely necessary. Standard floor surface preferred.

|                          |                                                                                                                                                                                                                                                                                                                                                                                                                                                                                                                                                                                                                                                                                                                               |
|--------------------------|-------------------------------------------------------------------------------------------------------------------------------------------------------------------------------------------------------------------------------------------------------------------------------------------------------------------------------------------------------------------------------------------------------------------------------------------------------------------------------------------------------------------------------------------------------------------------------------------------------------------------------------------------------------------------------------------------------------------------------|
| <b>Preparation</b>       | Participant lays supine on the floor with arms at sides                                                                                                                                                                                                                                                                                                                                                                                                                                                                                                                                                                                                                                                                       |
| <b>Starting position</b> | Supine on floor with arms at sides                                                                                                                                                                                                                                                                                                                                                                                                                                                                                                                                                                                                                                                                                            |
| <b>Instructions</b>      | When I say "GO" stand up from the floor as quickly and safely as you can, and stop by standing up straight with your arms by your side                                                                                                                                                                                                                                                                                                                                                                                                                                                                                                                                                                                        |
| <b>Timing</b>            | Start the watch on the word "go" and stop it when the participant is standing straight with arms by his side                                                                                                                                                                                                                                                                                                                                                                                                                                                                                                                                                                                                                  |
| <b>Grading</b>           | <ol style="list-style-type: none"> <li>1. <b>Unable</b> to stand from supine, even with use of chair*</li> <li>2. Assisted Gowers: requires <b>furniture or external support</b> for assist in arising from supine to full upright posture*</li> <li>3. Rolls over, stands up with <b>TWO hands</b> "climbing up" the legs to achieve full upright posture.</li> <li>4. Rolls over, stands up with <b>ONE hand</b> support on leg</li> <li>5. Rolls to the side and stands up with one or both hands on the floor to start to rise but <b>does not touch legs</b>.</li> <li>6. Stands up <b>without</b> rolling over or using hands on legs</li> </ol> <p>*A time will not be recorded if the functional grade is 1 or 2.</p> |
