# Supplementary material for: Efficacy and Safety of Vamorolone vs Placebo and Prednisone Among Boys With Duchenne Muscular Dystrophy: A Randomized Clinical Trial
Source: PubMed Central journal article supplement (PMC9425287; doi:10.1001/jamaneurol.2022.2480), 2022-08-29
Supplement: jamaneurol-e222480-s007.pdf [file jamaneurol-e222480-s007.pdf]

1  
2  
3  
4  
5  
6  
7  
8  
9

**ReveraGen BioPharma, Inc.**

**STATISTICAL ANALYSIS PLAN  
for Protocol VBP15-004 Treatment Period #1**

**Protocol Title:** A Phase IIb Randomized, Double-blind, Parallel Group, Placebo- and Active-controlled Study with Double-Blind Extension to Assess the Efficacy and Safety of Vamorolone in Ambulant Boys with Duchenne Muscular Dystrophy (DMD)

**Protocol Number** VBP15-004

**Phase:** Phase IIb

**Sponsor:** ReveraGen BioPharma, Inc.  
155 Gibbs Street  
Suite 433  
Rockville, MD 20850

**Author:** Summit Analytical, LLC  
8354 Northfield Blvd., Bldg. G Suite 3700  
Denver, CO 80238

**SAP Date:** 17 May 2021

**Status:** Final Version 3.0

10  
11

12

|                                                                                                                   |                                                |
|-------------------------------------------------------------------------------------------------------------------|------------------------------------------------|
|  <p><b>SUMMIT ANALYTICAL</b></p> | <b>Statistical Analysis Plan Approval Form</b> |
|-------------------------------------------------------------------------------------------------------------------|------------------------------------------------|

**Sponsor:** ReveraGen BioPharma, Inc.  
**Protocol:** VBP15-004  
**Protocol Title:** A Phase IIb Randomized, Double-blind, Parallel Group, Placebo- and Active-controlled Study with Double-Blind Extension to Assess the Efficacy and Safety of Vamorolone in Ambulant Boys with Duchenne Muscular Dystrophy (DMD)  
**SAP Version:** Final v3.0  
**SAP Date:** 17 May 2021

The statistical analysis plan has been reviewed and approved.

**Sponsor:** *ReveraGen BioPharma, Inc.*  
*Eric Hoffman, PhD*  
*CEO*

---

Signature \_\_\_\_\_ Date \_\_\_\_\_

**Author:** *Summit Analytical LLC*  
*Philip Shale, PhD*  
*Biostatistics*

---

Signature \_\_\_\_\_ Date \_\_\_\_\_

**Reviewer:** *Santhera Pharmaceuticals*  
*Mika Leinonen*  
*Head Biostatistics*

---

Signature \_\_\_\_\_ Date \_\_\_\_\_

**Reviewer:** *The Camden Group LLC*  
*Benjamin D. Schwartz, MD, PhD*  
*Consulting Medical Monitor*

---

Signature \_\_\_\_\_ Date \_\_\_\_\_

13 **1. TABLE OF CONTENTS**

|    |         |                                                                  |    |
|----|---------|------------------------------------------------------------------|----|
| 14 | 1.      | TABLE OF CONTENTS.....                                           | 3  |
| 15 | 2.      | LIST OF ABBREVIATIONS AND DEFINITION OF TERMS .....              | 6  |
| 16 | 3.      | INTRODUCTION .....                                               | 8  |
| 17 | 3.1.    | Preface .....                                                    | 8  |
| 18 | 3.2.    | Purpose of Analyses.....                                         | 8  |
| 19 | 3.3.    | Summary of Statistical Analysis Changes to the Protocol .....    | 9  |
| 20 | 4.      | STUDY OBJECTIVES AND ENDPOINTS .....                             | 11 |
| 21 | 4.1.    | Study Objectives .....                                           | 11 |
| 22 | 4.1.1.  | Primary Objectives.....                                          | 11 |
| 23 | 4.1.2.  | Secondary Objectives.....                                        | 11 |
| 24 | 4.1.3.  | Exploratory Objectives.....                                      | 11 |
| 25 | 4.2.    | Study Endpoints .....                                            | 12 |
| 26 | 4.2.1.  | Safety Endpoints .....                                           | 12 |
| 27 | 4.2.2.  | Tolerability Endpoint .....                                      | 13 |
| 28 | 4.2.3.  | Efficacy Endpoints .....                                         | 13 |
| 29 | 4.2.4.  | Exploratory Patient-reported Outcomes Endpoints .....            | 14 |
| 30 | 4.2.5.  | Pharmacodynamic Endpoints .....                                  | 15 |
| 31 | 5.      | STUDY METHODS.....                                               | 16 |
| 32 | 5.1.    | General Study Design and Plan.....                               | 16 |
| 33 | 5.2.    | Inclusion – Exclusion Criteria and General Study Population..... | 22 |
| 34 | 5.3.    | Randomization and Blinding.....                                  | 22 |
| 35 | 5.4.    | Analysis Variables .....                                         | 22 |
| 36 | 6.      | SAMPLE SIZE .....                                                | 23 |
| 37 | 7.      | GENERAL CONSIDERATIONS .....                                     | 25 |
| 38 | 7.1.    | Analysis Populations.....                                        | 25 |
| 39 | 7.1.1.  | Safety Population .....                                          | 25 |
| 40 | 7.1.2.  | Modified Intent-to-Treat (mITT) Population .....                 | 25 |
| 41 | 7.1.3.  | Per Protocol Population.....                                     | 25 |
| 42 | 7.2.    | Covariates and Subgroups.....                                    | 26 |
| 43 | 7.2.1.  | Planned Covariates.....                                          | 26 |
| 44 | 7.2.2.  | Subgroups.....                                                   | 26 |
| 45 | 7.3.    | Management of Analysis Data .....                                | 26 |
| 46 | 7.3.1.  | Data Handling .....                                              | 26 |
| 47 | 7.3.2.  | Missing Data .....                                               | 26 |
| 48 | 7.3.3.  | Handling of Early Termination Visit Information.....             | 32 |
| 49 | 7.3.4.  | Pooling of Investigational Sites.....                            | 32 |
| 50 | 7.3.5.  | Coding Conventions for Events and Medications .....              | 32 |
| 51 | 7.3.6.  | Baseline Visits.....                                             | 32 |
| 52 | 7.3.7.  | Calculating Derived Variables .....                              | 32 |
| 53 | 7.3.8.  | Analysis Software .....                                          | 37 |
| 54 | 7.3.9.  | Study Data.....                                                  | 37 |
| 55 | 7.3.10. | Period #1 Data Management Study Data Cutoff .....                | 38 |
| 56 | 7.4.    | General Statistical Methodology.....                             | 39 |
| 57 | 7.4.1.  | Statistical Summaries: Descriptive and Inferential .....         | 39 |

|    |        |                                                         |    |
|----|--------|---------------------------------------------------------|----|
| 58 | 7.4.2. | Interim Analyses and Data Monitoring .....              | 39 |
| 59 | 7.4.3. | Week 24 Analysis .....                                  | 40 |
| 60 | 7.4.4. | Week 48 Analysis .....                                  | 40 |
| 61 | 7.4.5. | Multiple Testing Procedures .....                       | 40 |
| 62 | 7.5.   | Summary of Study Data .....                             | 41 |
| 63 | 7.5.1. | Subject Summary Grouping .....                          | 41 |
| 64 | 7.5.2. | Study Disposition .....                                 | 41 |
| 65 | 7.5.3. | Protocol Deviations .....                               | 41 |
| 66 | 7.5.4. | Demographics and Baseline Characteristics .....         | 41 |
| 67 | 7.5.5. | Medical History .....                                   | 42 |
| 68 | 7.5.6. | Prior and Concomitant Medications .....                 | 42 |
| 69 | 7.5.7. | Treatment Compliance and Study Drug Exposure .....      | 43 |
| 70 | 7.6.   | Efficacy Analyses .....                                 | 43 |
| 71 | 7.7.   | Safety Analyses .....                                   | 48 |
| 72 | 7.7.1. | Adverse Events .....                                    | 48 |
| 73 | 7.7.2. | Vital Signs, 12-Lead ECG, and Laboratory Outcomes ..... | 50 |
| 74 | 7.7.3. | Physical Examination .....                              | 51 |
| 75 | 7.7.4. | Other Safety Measures .....                             | 51 |
| 76 | 7.8.   | Exploratory Analyses .....                              | 52 |
| 77 | 7.9.   | Pharmacodynamic (PD) Serum and Other Biomarkers .....   | 52 |
| 78 | 8.     | REPORTING CONVENTIONS .....                             | 54 |
| 79 | 8.1.   | General Reporting Conventions .....                     | 54 |
| 80 | 8.2.   | Population Summary Conventions .....                    | 55 |
| 81 | 9.     | REFERENCES .....                                        | 57 |
| 82 | 10.    | APPENDICES .....                                        | 59 |
| 83 | 10.1.  | List of Tables, Listings, and Figures .....             | 59 |
| 84 | 10.2.  | SAP Amendment Summary of Important Changes .....        | 59 |
| 85 |        |                                                         |    |

86  
87  
88  
89  
90  
91  
92  
93  
94  
95  
96  
97

**LIST OF TABLES**

|         |                                    |    |
|---------|------------------------------------|----|
| Table 1 | Study Randomization Schedule ..... | 16 |
| Table 2 | Schedule of Study Activities ..... | 17 |

**LIST OF FIGURES**

|          |                                                     |    |
|----------|-----------------------------------------------------|----|
| Figure 1 | SDTM, ADaM, and TFL Development and Validation..... | 38 |
|----------|-----------------------------------------------------|----|

98 **2. LIST OF ABBREVIATIONS AND DEFINITION OF TERMS**

99 Only abbreviations and terms relevant to the SAP are repeated herein. The reader is referred  
100 to the protocol for the complete and comprehensive list of abbreviations and definitions of  
101 terms for the study.

|        |                                                        |
|--------|--------------------------------------------------------|
| ACTH   | adrenocorticotrophic hormone                           |
| AE     | adverse event                                          |
| ANCOVA | analysis of covariance                                 |
| BL     | baseline                                               |
| BMC    | bone mineral content                                   |
| BMI    | body mass index                                        |
| CINRG  | Cooperative International Neuromuscular Research Group |
| CK     | creatine kinase                                        |
| cm     | centimeter                                             |
| CTCAE  | Common Terminology Criteria for Adverse Events         |
| CTX    | carboxy-terminal telopeptide                           |
| CV     | coefficient of variation                               |
| dL     | deciliter                                              |
| DMD    | Duchenne muscular dystrophy                            |
| DSMB   | data and safety monitoring board                       |
| ECG    | electrocardiogram                                      |
| eCRF   | electronic case report form                            |
| EDC    | electronic data capture                                |
| F/U    | follow-up                                              |
| g      | gram                                                   |
| GLDH   | glutamate dehydrogenase                                |
| HbA1c  | hemoglobin A1c                                         |
| HDL    | high density lipoprotein                               |
| ICH    | International Conference on Harmonisation              |
| IND    | investigational new drug                               |
| L      | Liter                                                  |
| LLC    | limited liability company                              |
| LDL    | low density lipoprotein                                |
| LS     | least squares                                          |
| m      | meter                                                  |

|         |                                                   |
|---------|---------------------------------------------------|
| MAR     | missing at random                                 |
| MCMC    | Markov Chain Monte Carlo                          |
| MedDRA  | Medical Dictionary for Regulatory Activities      |
| mg      | milligram                                         |
| MI      | multiple imputation                               |
| mL      | milliliter                                        |
| MMRM    | mixed model for repeated measures                 |
| MNAR    | missing not at random                             |
| No., n  | number                                            |
| NSAA    | North Star Ambulatory Assessment                  |
| %CV     | percentage coefficient of variation               |
| PD      | pharmacodynamic(s)                                |
| P1NP    | serum aminoterminal propeptide of type I collagen |
| PK      | pharmacokinetic(s)                                |
| PMM     | pattern mixture model                             |
| PODCI   | Pediatric Outcomes Data Collection Instrument     |
| 6MWT    | six-minute walk test                              |
| REML    | restricted maximum likelihood                     |
| ROM     | range of motion (test)                            |
| SAE     | serious adverse event                             |
| SAP     | statistical analysis plan                         |
| SCR     | screening                                         |
| SD      | standard deviation                                |
| SDTM    | Study Data Tabulation Model                       |
| SOC     | system organ class                                |
| TEAE    | treatment-emergent adverse event                  |
| TSQM    | Treatment Satisfaction Questionnaire              |
| TTCLIMB | time to climb (test)                              |
| TTSTAND | time to stand (test)                              |
| TTRW    | time to run/walk (test)                           |
| vs.     | versus                                            |
| WHO     | World Health Organization                         |

### 103 3. INTRODUCTION

#### 104 3.1. Preface

105 This document presents a statistical analysis plan (SAP) for Treatment Period #1 of  
106 ReveraGen BioPharma, Inc. Protocol VBP15-004, (*A Phase IIb Randomized, Double-blind,*  
107 *Parallel Group, Placebo- and Active-controlled Study with Double-Blind Extension to Assess*  
108 *the Efficacy and Safety of Vamorolone in Ambulant Boys with Duchenne Muscular*  
109 *Dystrophy (DMD)*). This SAP will provide the details and methods for analysis and reporting  
110 of the subject characteristics, safety, and efficacy information for data captured during  
111 Period #1 of this study, i.e. through the Week 24 Follow-up (F/U) Visit. A separate SAP will  
112 be developed for the data captured during the entire study (Period #1, Transition Period, and  
113 Period #2) (see [Section 3.2](#) of this SAP).

114 Reference materials for this SAP include the protocol VBP15-004 (Amendment #4 Dated: 28  
115 August 2020).

116 The SAP described herein is an *a priori* plan. The SAP will be finalized and approved prior  
117 to database lock and unblinding. Statistical programming may occur as study data  
118 accumulate in order to have analysis programs ready at the time the study finishes.

119 As divergent recommendations on the analysis plans for the VBP15-004 study were received  
120 by FDA and EMA, this version of the SAP is specifically designed for data analysis in line  
121 with FDA recommendation for analysis of Period #1 data. The separate SAP, as mentioned  
122 above, will be developed to accommodate recommendations specified by EMA, in addition  
123 to describing the data analysis of the entire study.

124 For publication and other commercial purposes of the Period #1 VBP15-004 study data, the  
125 primary analysis as specified in this SAP will be considered the primary analysis of the  
126 study.

#### 127 3.2. Purpose of Analyses

128 The purposes of the planned analyses described in this SAP are to assess the safety,  
129 tolerability, pharmacodynamics, and efficacy of two oral doses of vamorolone  
130 (2.0 mg/kg/day and 6.0 mg/kg/day) in ambulant boys ages 4-< 7 years with DMD. Safety and  
131 efficacy endpoints (clinical and biomarker) will be compared to a placebo group, and to a  
132 group treated with oral prednisone (0.75 mg/kg/day).

133 The study has four periods: Treatment Period #1, a Transition Period, Treatment Period #2,  
134 and a Dose-tapering Period applicable to a subset of subjects.

- 135 • Period #1 is a double-blind, placebo-controlled, prednisone-controlled 24-week  
136 treatment period;



- 137       • The Transition Period is a 4-week double-blind period during which all subjects taper  
138       off their placebo or prednisone tablets; and
- 139       • Period #2 is a double-blind 20-week treatment period during which all subjects are  
140       treated with vamorolone 2.0 mg/kg/day or 6.0 mg/kg/day; and
- 141       • The Dose-tapering Period is a 4-week double-blind period during which subjects who  
142       choose not to receive further vamorolone treatment by enrolling directly into a  
143       subsequent vamorolone general access program will have their dose of vamorolone  
144       suspension tapered and discontinued.

145       This SAP is relevant to Period #1, the double-blind, placebo-controlled, prednisone-  
146       controlled part of the study, with the clinical study report corresponding to the initial  
147       24-week Period #1. Results from the analyses completed will be included in the Period #1  
148       24-week clinical study report for VBP15-004, and may also be utilized for regulatory  
149       submissions, manuscripts, additional endpoint specific reports, or other clinical development  
150       activities.

151       A separate SAP and clinical study report will be issued for the entire VBP15-004 study,  
152       including the initial 24-week Period #1, the Transition Period (Weeks 25-28), and the second  
153       20-week Period #2 (when all subjects are treated with vamorolone). The separate SAP for the  
154       entire VBP15-004 study will be finalized before unblinding of data from Period #1.  
155       Furthermore, the separate SAP defines the analyses as recommended by the EMA. The two  
156       SAPs of this study as consistent with each other regarding the analyses specific to Period #1,  
157       including the analysis of the primary and secondary efficacy endpoints (with the exception of  
158       which of the analyses is considered as primary by FDA and EMA, respectively).

159       Post-hoc exploratory analyses not identified in this SAP may be performed to further  
160       examine the study data and provide context for study results. These analyses will be clearly  
161       identified, where appropriate, in the final clinical study report.

162       Additional analyses not prospectively identified in this SAP may also be completed for  
163       publications, additional endpoint specific reports, regulatory, or funding inquiries. These  
164       analyses, if performed, may not be reported in the clinical study report, but will be fully  
165       documented in the document containing the additional analyses.

### 166       **3.3.               Summary of Statistical Analysis Changes to the Protocol**

167       The analyses described in this analysis plan are consistent with the analyses described in the  
168       study protocol with the exception of those items noted in this section.

169       Spine x-ray analysis is discussed in the protocol. It will be presented in a separate SAP and is  
170       not included in this SAP.

171 Analysis of DNA testing (genetic modifiers) is described as an additional exploratory  
172 endpoint in the protocol. However, the DNA samples will be stored for later testing after  
173 completion of the 48-week trial and are not analyzed in this SAP.

174 Exploratory biomarkers mentioned in the protocol will be tested and described in a later  
175 report, with samples stored and studied later and are not included in this SAP.

176

177

## 178 4. STUDY OBJECTIVES AND ENDPOINTS

179 Study objectives and endpoints defined in the protocol include safety, tolerability,  
180 pharmacokinetics, pharmacodynamics, and efficacy endpoints. Objectives and pre-specified  
181 endpoints for Treatment Period #1 are as follows:

### 182 4.1. Study Objectives

#### 183 4.1.1. Primary Objectives

184 The primary objectives of this study are:

- 185 1. To compare the efficacy of vamorolone administered orally at daily doses of  
186 6.0 mg/kg over a 24-week treatment period vs. placebo in ambulant boys ages 4 to <7  
187 years with DMD; and
- 188 2. To evaluate the safety and tolerability of vamorolone administered orally at daily  
189 doses of 2.0 mg/kg and 6.0 mg/kg in ambulant boys ages 4 to <7 years with DMD.

#### 190 4.1.2. Secondary Objectives

191 The secondary objectives of this study are:

- 192 1. To compare the efficacy of vamorolone administered orally at daily doses of  
193 2.0 mg/kg over a 24-week treatment period vs. placebo in ambulant boys ages 4 to <7  
194 years with DMD;
- 195 2. To compare the safety of vamorolone administered orally at daily doses of 2.0 mg/kg  
196 and 6.0 mg/kg over a 24-week treatment period vs. daily prednisone 0.75 mg/kg in  
197 ambulant boys ages 4 to <7 years with DMD; and
- 198 3. To compare the efficacy of vamorolone administered orally at daily doses of  
199 2.0 mg/kg and 6.0 mg/kg over a 24-week treatment period vs. daily prednisone  
200 0.75 mg/kg in ambulant boys ages 4 to <7 years with DMD.

#### 201 4.1.3. Exploratory Objectives

202 The exploratory objectives of this study are:

- 203 1. To evaluate the satisfaction with treatment of vamorolone administered orally at daily  
204 doses of 2.0 mg/kg and 6.0 mg/kg over a 24-week treatment period vs. daily  
205 prednisone 0.75 mg/kg in ambulant boys ages 4 to <7 years with DMD;
- 206 2. To evaluate the effect of vamorolone administered orally at daily doses of 2.0 mg/kg  
207 and 6.0 mg/kg over a 24-week treatment period vs. daily prednisone 0.75 mg/kg on  
208 behaviour and neuropsychology;
- 209 3. To evaluate the effect of vamorolone administered orally at daily doses of 2.0 mg/kg  
210 and 6.0 mg/kg over a 24-week treatment period vs. placebo on physical functioning.
- 211 4. To assess the ease of administration of the study medication suspension to ambulant  
212 boys ages 4 to <7 years with DMD;
- 213 5. To compare the effects of vamorolone administered orally at daily doses of 2.0 mg/kg  
214 and 6.0 mg/kg over a 24-week treatment period vs. placebo on potential serum

- 215 pharmacodynamics (PD) biomarkers of safety and efficacy in ambulant boys ages 4  
216 to <7 years with DMD;  
217 6. To compare the effects of vamorolone administered orally at daily doses of 2.0 mg/kg  
218 and 6.0 mg/kg over a 24-week treatment period vs. daily prednisone 0.75 mg/kg on  
219 potential serum PD biomarkers of safety and efficacy in ambulant boys ages 4 to  
220 <7 years with DMD; and  
221 7. To determine if candidate genetic modifiers of DMD (gene polymorphisms associated  
222 with disease severity, or response to glucocorticoid treatment) are similarly associated  
223 with vamorolone-treated DMD subjects (baseline disease severity, or response to  
224 vamorolone or prednisone treatment).

## 225 4.2. Study Endpoints

### 226 4.2.1. Safety Endpoints

- 227 1. Linear growth velocity: Comparison of each vamorolone dose level group with the  
228 prednisone group in change in height percentile for age from baseline;  
229 2. Adrenal suppression: Comparison of each vamorolone dose level group with the  
230 prednisone group and of vamorolone 2.0 mg/kg/day vs. vamorolone 6.0 mg/kg/day in  
231 % of subjects with peak cortisol below 18 µg/dL (500 nM) in the ACTH stimulation  
232 test at Week 24 at 30 or 60 minutes after stimulation with Cosyntropin;  
233 3. Cushingoid features: Comparison of each vamorolone dose level group with the  
234 prednisone group in change from baseline to each of the scheduled on-treatment and  
235 post-treatment assessment time points (changes from baseline will be recorded as  
236 AEs);  
237 4. Dual-energy x-ray absorptiometry (DXA) scan: Comparison of both vamorolone dose  
238 level groups with the prednisone group:  
239 • Percent change from baseline to Week 24 in spine BMD (g/cm<sup>2</sup>)  
240 • Percent change from baseline to Week 24 in total body BMD (g/cm<sup>2</sup>)  
241 • Percent change from baseline to Week 24 spine and total body bone mass (bone  
242 mineral content, g)  
243 • Percent change from baseline to Week 24 in total body composition (lean mass  
244 (g), fat mass (g), fat-free mass (g), Lean Mass Index (kg/m<sup>2</sup>), and Fat Mass Index  
245 (kg/m<sup>2</sup>));  
246 5. BMI Z-score: Comparison of each vamorolone dose level group with the prednisone  
247 group in change from baseline;  
248 6. Treatment-emergent adverse events (TEAEs) and serious adverse events (SAEs) by  
249 system organ class (SOC): Overall by treatment, by treatment and relationship, and  
250 by treatment and intensity (see protocol Section **Error! Reference source not**  
251 **found.**);  
252 7. Vital signs (sitting blood pressure, heart rate, respiratory rate, and body temperature):  
253 Change from baseline to each of the scheduled on-treatment and post-treatment  
254 assessment time points;

- 255 8. Body weight, height, and BMI ( $\text{kg}/\text{m}^2$ ): Change from baseline to each of the  
256 scheduled on-treatment and post-treatment assessment time points;  
257 9. Clinical laboratory values: Change from baseline to each of the scheduled  
258 on-treatment and post-treatment assessment time points in:
- 259 • Hematology and clinical chemistry
  - 260 • Lipid profile (triglycerides, total cholesterol, low density lipoprotein [LDL], high  
261 density lipoprotein [HDL])
  - 262 • Vitamin D level
  - 263 • Urinalysis;
- 264 10. 12-lead electrocardiogram (ECG): Change from baseline to each of the scheduled  
265 on-treatment and post-treatment assessment time points;  
266 11. 2D-echocardiogram: Change from baseline to Week 24;  
267 12. Eye examination for detection of clinically significant abnormalities (cataracts and/or  
268 glaucoma) at the Week 24 assessment compared to baseline.  
269

270 Data for the following additional safety outcomes will be listed only:

- 271 1. Physical examination findings at each of the pretreatment, on-treatment, and  
272 post-treatment assessment time points;  
273 2. Fracture Questionnaire results at pretreatment and Week 24.

#### 274 4.2.2. Tolerability Endpoint

- 275 1. Premature discontinuations of study treatment due to adverse events.

#### 276 4.2.3. Efficacy Endpoints

##### 277 4.2.3.1. Primary Efficacy Endpoint

278 TTSTAND velocity (rise/second): Comparison of vamorolone 6.0 mg/kg/day dose level  
279 group versus the placebo group in change from baseline to the Week 24 assessment. The  
280 velocity will be calculated as defined in [Section 7.3.7](#).

##### 281 4.2.3.2. Secondary Efficacy Endpoints (by fixed sequential testing following successful 282 statistical testing of the primary efficacy endpoint)

283 Change from baseline to Week 24 for the following comparisons:

- 284 • TTSTAND velocity, vamorolone 2.0 mg/kg/day vs. placebo
- 285 • 6 Minute Walk Test (6MWT) meters walked, vamorolone 6.0 mg/kg/day vs. placebo
- 286 • 6 Minute Walk Test (6MWT) meters walked, vamorolone 2.0 mg/kg/day vs. placebo
- 287 • Time to Run/Walk (TTRW) 10 meters velocity, vamorolone 6.0 mg/kg/day vs.  
288 placebo
- 289 • Time to Run/Walk (TTRW) 10 meters velocity, vamorolone 2.0 mg/kg/day vs.  
290 placebo

- 291       • 6MWT meters walked, vamorolone 6.0 mg/kg/day vs. prednisone  
292       • 6MWT meters walked, vamorolone 2.0 mg/kg/day vs. prednisone  
293

#### 294 4.2.3.3. Exploratory Efficacy Endpoints

295 Change from baseline to each of the scheduled study assessment time points up to and  
296 including Week 24 for the following comparisons:

- 297       • TTSTAND velocity, vamorolone 6.0 mg/kg/day vs. placebo (Week 6 and 12 only)  
298       • TTSTAND velocity, vamorolone 2.0 mg/kg/day vs. placebo (Week 6 and 12 only)  
299       • 6 Minute Walk Test (6MWT) meters walked, vamorolone 6.0 mg/kg/day vs. placebo  
300       (Week 12 only)  
301       • 6 Minute Walk Test (6MWT) meters walked, vamorolone 2.0 mg/kg/day vs. placebo  
302       (Week 12 only)  
303       • TTRW 10 meters velocity, vamorolone 6.0 mg/kg/day vs. placebo (Week12 only)  
304       • TTRW 10 meters velocity, vamorolone 2.0 mg/kg/day vs. placebo (Week12 only)  
305       • 6MWT meters walked, vamorolone 6.0 mg/kg/day vs. prednisone (Week 12 only)  
306       • 6MWT meters walked, vamorolone 2.0 mg/kg/day vs. prednisone (Week 12 only)  
307       • NSAA total score, vamorolone 6.0 mg/kg/day vs. placebo  
308       • NSAA total score, vamorolone 2.0 mg/kg/day vs. placebo  
309       • Hand-held Myometry knee extensors, vamorolone 6.0 mg/kg/day vs. placebo  
310       • Hand-held Myometry knee extensors, vamorolone 2.0 mg/kg/day vs. placebo  
311       • Hand-held Myometry elbow flexors, vamorolone 6.0 mg/kg/day vs. placebo  
312       • Hand-held Myometry elbow flexors, vamorolone 2.0 mg/kg/day vs. placebo  
313       • Time to Climb (TTCLIMB) velocity, vamorolone 6.0 mg/kg/day vs. placebo  
314       • Time to Climb (TTCLIMB) velocity, vamorolone 2.0 mg/kg/day vs. placebo  
315       • Range of Motion (ROM) in the ankles, vamorolone 6.0 mg/kg/day vs. placebo  
316       • Range of Motion (ROM) in the ankles, vamorolone 2.0 mg/kg/day vs. placebo  
317

#### 318 4.2.4. Exploratory Patient-reported Outcomes Endpoints

- 319       1. Treatment satisfaction questionnaire (TSQM): Comparison of each vamorolone dose  
320       level group to the prednisone group at the Week 24 visit;  
321       2. Pediatric Outcomes Data Collection Instrument (PODCI): Comparison of each  
322       vamorolone dose level group to the placebo group for change from baseline to the  
323       Week 24 assessment;  
324       3. Behavioral changes (PARS III): Comparison of each vamorolone dose level group to  
325       the prednisone group and to the placebo group for change from baseline to each of the  
326       scheduled study assessment time points up to the Week 24 assessment for four PARS  
327       III subscores for peer relations, dependency, anxiety and depression, and withdrawal;  
328       4. Ease of study medication administration (Question 1 only; tablet vs. liquid) assessed  
329       at each of the scheduled study assessment time points; and

330 5. Blindedness Assessment at each of the scheduled study assessment time points.

331 **4.2.5. Pharmacodynamic Endpoints**

332 1. The following pharmacodynamic biomarkers are considered secondary outcome  
333 measures focusing on safety outcomes. In each case, the biomarkers studied reflect  
334 safety concerns of glucocorticoids:

335 a. Adrenal suppression. First-in-morning serum cortisol levels (fasting and non-  
336 fasting) will be measured. Cortisol measures falling below 3.6 µg/dL (or  
337 100 nM) will be considered to be indicative of the development of adrenal  
338 suppression. ACTH Stimulation Test will be performed at the Screening Visit  
339 and at the Week 24 Follow-up Visit (48 ± 3 hours after the final dose of  
340 Treatment Period #1 study medication): peak cortisol levels <18 µg/dL (or  
341 500 nM) 30 or 60 minutes after stimulation with Cosyntropin (250 µg) will be  
342 considered to be indicative of adrenal suppression, where peak is the higher of  
343 the 30- and 60-minute assessments.

344 b. Bone turnover. Measures of serum osteocalcin are reflective of bone  
345 formation, and measures of serum CTX1 are reflective of bone resorption.  
346 Levels of osteocalcin and CTX1 predict later clinical safety concerns of  
347 osteopenia and bone fragility.

348 c. Insulin resistance. Glucocorticoids cause both acute and chronic insulin  
349 resistance, with serum elevations of both insulin and glucose. Measures of  
350 hyperinsulinemia and hyperglycemia are accepted measures of insulin  
351 resistance.

352 2. Exploratory biomarkers for aspects of safety and efficacy will be studied and reported  
353 at a later date.

354 **5. STUDY METHODS**

355 **5.1. General Study Design and Plan**

356 As background for the statistical methods presented below, this section provides an overview  
357 of the study design and plan of study execution. The protocol is the definitive reference for  
358 all matters discussed in what follows.

359 This Phase IIb study is a randomized, double-blind, parallel group, placebo- and active-  
360 controlled study with double-blind extension to evaluate the long-term efficacy, safety,  
361 tolerability, PD, and population PK of vamorolone (the investigational medicine) compared  
362 to prednisone (active control) and placebo over a Treatment Period of 24 weeks in boys ages  
363 4 to <7 years with DMD (Period #1), and determine the persistence of effect over a total  
364 Treatment Period of 48 weeks. Six treatment groups will receive either vamorolone at one of  
365 two doses (2.0 mg/kg or 6.0 mg/kg), prednisone (0.75 mg/kg), or placebo once daily for  
366 24 weeks, and will receive vamorolone at one of two doses (2.0 mg/kg or 6.0 mg/kg) daily  
367 for an additional 20 weeks (Period #2). A total of approximately 120 subjects will be  
368 randomized into the study as shown in Table 11.

369 **Table 1 Study Randomization Schedule**

| Group | Planned Number of Subjects | Treatment Period #1 (24 Weeks) | Treatment Period #2 (20 Weeks) |
|-------|----------------------------|--------------------------------|--------------------------------|
| 1     | 30                         | Vamorolone, 2.0 mg/kg/day →    | Vamorolone, 2.0 mg/kg/day      |
| 2     | 30                         | Vamorolone, 6.0 mg/kg/day →    | Vamorolone, 6.0 mg/kg/day      |
| 3     | 15                         | Prednisone, 0.75 mg/kg/day →   | Vamorolone, 2.0 mg/kg/day      |
| 4     | 15                         | Prednisone, 0.75 mg/kg/day →   | Vamorolone, 6.0 mg/kg/day      |
| 5     | 15                         | Placebo →                      | Vamorolone, 2.0 mg/kg/day      |
| 6     | 15                         | Placebo →                      | Vamorolone, 6.0 mg/kg/day      |

370  
371  
372  
373

**Error! Reference source not found.** presents the schedule of study procedures.



374 **Table 2** **Schedule of Study Activities**

| Study Day or Week/Visit                           | Pretreatment Period    |                 | Treatment Period #1 |                      |                      |                       |                       |                                    |                       | Transition Period | Treatment Period #2                |       |                       |                       |                       |                                    |                     | Dose-tapering Period |                                    |
|---------------------------------------------------|------------------------|-----------------|---------------------|----------------------|----------------------|-----------------------|-----------------------|------------------------------------|-----------------------|-------------------|------------------------------------|-------|-----------------------|-----------------------|-----------------------|------------------------------------|---------------------|----------------------|------------------------------------|
|                                                   | SCR                    | BL              |                     |                      |                      |                       |                       |                                    |                       |                   |                                    |       |                       |                       |                       |                                    |                     |                      |                                    |
|                                                   | Day                    |                 | Week                |                      |                      |                       |                       |                                    |                       |                   |                                    |       |                       |                       |                       |                                    |                     |                      |                                    |
|                                                   | -33 to -2 <sup>a</sup> | -1 <sup>b</sup> | 1 <sup>c</sup>      | 2 (±1d) <sup>d</sup> | 6 (±3d) <sup>d</sup> | 12 (±1w) <sup>d</sup> | 18 (±1w) <sup>d</sup> | 24 <sup>e</sup> (±1w) <sup>d</sup> | 24 (F/U) <sup>e</sup> | 26                | 28 <sup>f</sup> (±1d) <sup>d</sup> | 28+1d | 30 (±1d) <sup>d</sup> | 34 (±3d) <sup>d</sup> | 40 (±1w) <sup>d</sup> | 48 <sup>g</sup> (±1w) <sup>d</sup> | 48 F/U <sup>g</sup> | 50                   | 52 <sup>h</sup> (±1d) <sup>d</sup> |
| Informed consent                                  | X                      |                 |                     |                      |                      |                       |                       |                                    |                       |                   |                                    |       |                       |                       |                       |                                    |                     |                      |                                    |
| Enrollment <sup>i</sup>                           | X                      |                 |                     |                      |                      |                       |                       |                                    |                       |                   |                                    |       |                       |                       |                       |                                    |                     |                      |                                    |
| Inclusion/exclusion criteria                      | X                      | X <sup>j</sup>  |                     |                      |                      |                       |                       |                                    |                       |                   |                                    |       |                       |                       |                       |                                    |                     |                      |                                    |
| Randomization <sup>k</sup>                        | X                      |                 |                     |                      |                      |                       |                       |                                    |                       |                   |                                    |       |                       |                       |                       |                                    |                     |                      |                                    |
| Demographics                                      | X                      |                 |                     |                      |                      |                       |                       |                                    |                       |                   |                                    |       |                       |                       |                       |                                    |                     |                      |                                    |
| Medical history                                   | X                      |                 |                     |                      |                      |                       |                       |                                    |                       |                   |                                    |       |                       |                       |                       |                                    |                     |                      |                                    |
| Medication history                                | X                      | X               |                     |                      |                      |                       |                       |                                    |                       |                   |                                    |       |                       |                       |                       |                                    |                     |                      |                                    |
| Physical examination                              | X                      | X               |                     | X                    | X                    | X                     | X                     | X                                  |                       | X                 |                                    |       | X                     | X                     | X                     | X                                  |                     |                      | X                                  |
| Cushingoid features                               |                        | X               |                     | X                    | X                    | X                     | X                     | X                                  |                       | X                 |                                    |       | X                     | X                     | X                     | X                                  |                     |                      | X                                  |
| Height                                            | X                      |                 |                     |                      |                      | X                     |                       | X                                  |                       |                   |                                    |       |                       | X                     |                       | X                                  |                     |                      |                                    |
| Weight                                            | X                      | X               |                     | X                    | X                    | X                     | X <sup>l</sup>        | X                                  |                       | X                 |                                    |       | X                     | X                     | X <sup>l</sup>        | X                                  |                     |                      | X                                  |
| Vital signs <sup>m</sup>                          | X                      | X               | X <sup>n</sup>      | X                    | X                    | X                     | X                     | X                                  |                       | X                 |                                    |       | X                     | X                     | X                     | X                                  |                     |                      | X                                  |
| Blood for clinical labs <sup>o</sup>              | X                      |                 | X <sup>p</sup>      | X <sup>p</sup>       | X                    | X <sup>p</sup>        | X                     | X <sup>p</sup>                     |                       | X <sup>p</sup>    |                                    |       | X <sup>p</sup>        | X                     | X <sup>p</sup>        | X <sup>p</sup>                     |                     |                      | X <sup>p</sup>                     |
| Blood for HbA1c <sup>o</sup>                      | X                      |                 |                     |                      |                      |                       |                       | X                                  |                       |                   |                                    |       |                       |                       |                       | X                                  |                     |                      |                                    |
| Blood for vitamin D <sup>o</sup>                  | X                      |                 |                     |                      |                      | X                     |                       | X                                  |                       |                   |                                    |       |                       |                       | X                     | X                                  |                     |                      |                                    |
| Confirmation of varicella immunity                | X                      |                 |                     |                      |                      |                       |                       |                                    |                       |                   |                                    |       |                       |                       |                       |                                    |                     |                      |                                    |
| Urinalysis <sup>q</sup>                           | X                      |                 | X <sup>p</sup>      | X <sup>p</sup>       | X                    | X <sup>p</sup>        | X                     | X <sup>p</sup>                     |                       | X <sup>p</sup>    |                                    |       | X <sup>p</sup>        | X                     | X <sup>p</sup>        | X <sup>p</sup>                     |                     |                      | X <sup>p</sup>                     |
| Blood for serum PD biomarker panel <sup>r,s</sup> |                        |                 | X                   |                      |                      | X                     |                       | X                                  |                       | X                 |                                    |       |                       |                       | X                     | X                                  |                     |                      | X                                  |
| Fasting blood for insulin, glucose <sup>s</sup>   |                        |                 | X                   |                      |                      | X                     |                       | X                                  |                       | X                 |                                    |       |                       |                       | X                     | X                                  |                     |                      | X                                  |
| Blood for DNA Testing                             |                        |                 |                     |                      |                      |                       |                       | X                                  |                       |                   |                                    |       |                       |                       |                       |                                    |                     |                      |                                    |
| ACTH Stimulation Test                             | X                      |                 |                     |                      |                      |                       |                       |                                    | X <sup>t</sup>        |                   |                                    |       |                       |                       |                       |                                    |                     | X <sup>t</sup>       |                                    |
| Blood for Plasma PK                               |                        |                 |                     |                      |                      |                       |                       |                                    |                       |                   |                                    |       | X <sup>u</sup>        |                       |                       |                                    |                     |                      |                                    |
| 12-lead ECG <sup>v</sup>                          | X                      |                 |                     |                      | X                    |                       |                       | X                                  |                       |                   |                                    |       |                       |                       | X                     | X                                  |                     |                      |                                    |
| 2D-echocardiogram                                 | X                      |                 |                     |                      |                      |                       |                       | X                                  |                       |                   |                                    |       |                       |                       | X                     | X                                  |                     |                      |                                    |

| Study Day or Week/Visit                               | Pretreatment Period    |                 | Treatment Period #1 |                      |                      |                       |                       |                                    |                       | Transition Period | Treatment Period #2                |       |                       |                       |                       |                                    |                     | Dose-tapering Period |                                    |
|-------------------------------------------------------|------------------------|-----------------|---------------------|----------------------|----------------------|-----------------------|-----------------------|------------------------------------|-----------------------|-------------------|------------------------------------|-------|-----------------------|-----------------------|-----------------------|------------------------------------|---------------------|----------------------|------------------------------------|
|                                                       | SCR                    | BL              |                     |                      |                      |                       |                       |                                    |                       |                   |                                    |       |                       |                       |                       |                                    |                     |                      |                                    |
|                                                       | Day                    |                 | Week                |                      |                      |                       |                       |                                    |                       |                   |                                    |       |                       |                       |                       |                                    |                     |                      |                                    |
|                                                       | -33 to -2 <sup>a</sup> | -1 <sup>b</sup> | 1 <sup>c</sup>      | 2 (±1d) <sup>d</sup> | 6 (±3d) <sup>d</sup> | 12 (±1w) <sup>d</sup> | 18 (±1w) <sup>d</sup> | 24 <sup>e</sup> (±1w) <sup>d</sup> | 24 (F/U) <sup>e</sup> | 26                | 28 <sup>f</sup> (±1d) <sup>d</sup> | 28+1d | 30 (±1d) <sup>d</sup> | 34 (±3d) <sup>d</sup> | 40 (±1w) <sup>d</sup> | 48 <sup>g</sup> (±1w) <sup>d</sup> | 48 F/U <sup>g</sup> | 50                   | 52 <sup>h</sup> (±1d) <sup>d</sup> |
| Eye examination                                       | X                      |                 |                     |                      |                      |                       |                       | X                                  |                       |                   |                                    |       |                       |                       |                       | X                                  |                     |                      |                                    |
| DXA scan                                              | X                      |                 |                     |                      |                      |                       |                       | X                                  |                       |                   |                                    |       |                       |                       |                       | X                                  |                     |                      |                                    |
| Spine X-ray                                           | X                      |                 |                     |                      |                      |                       |                       | X                                  |                       |                   |                                    |       |                       |                       |                       |                                    |                     |                      |                                    |
| Fracture Questionnaire                                | X                      |                 |                     |                      |                      |                       |                       | X                                  |                       |                   |                                    |       |                       |                       |                       | X                                  |                     |                      |                                    |
| Dispense study medication                             |                        |                 | X                   | X                    | X                    | X                     |                       | X                                  |                       | X                 |                                    |       |                       | X                     | X                     |                                    | X                   |                      |                                    |
| Return study medication/<br>compliance monitoring     |                        |                 |                     | X <sup>w</sup>       | X                    | X                     | X                     | X                                  |                       | X                 |                                    |       | X <sup>w</sup>        | X                     | X                     | X                                  |                     |                      | X                                  |
| Study medication dosing <sup>x</sup>                  |                        |                 | X                   |                      |                      |                       |                       | X                                  |                       |                   |                                    | X     |                       |                       |                       | X                                  |                     |                      |                                    |
| Study medication dose tapering                        |                        |                 |                     |                      |                      |                       |                       |                                    | X <sup>y</sup>        | X                 |                                    |       |                       |                       |                       |                                    | X                   |                      | X                                  |
| Telephone call to subject <sup>z</sup>                |                        |                 |                     |                      |                      |                       |                       |                                    |                       | X                 |                                    |       |                       |                       |                       |                                    |                     | X                    |                                    |
| Time to Stand Test (TTSTAND)                          | X                      | X               |                     | X                    | X                    |                       | X                     |                                    |                       |                   |                                    |       |                       | X                     | X                     | X                                  |                     |                      |                                    |
| Time to Climb Test (TTCLIMB)                          | X                      | X               |                     |                      |                      | X                     | X                     |                                    |                       |                   |                                    |       |                       |                       | X                     | X                                  |                     |                      |                                    |
| Time to Run/Walk Test (TTRW)                          | X                      | X               |                     |                      |                      | X                     | X                     |                                    |                       |                   |                                    |       |                       |                       | X                     | X                                  |                     |                      |                                    |
| NSAA <sup>aa</sup>                                    | X                      | X               |                     |                      |                      | X                     | X                     |                                    |                       |                   |                                    |       |                       |                       | X                     | X                                  |                     |                      |                                    |
| Myometry (elbow flexors, knee extensors)              | X                      | X               |                     |                      |                      | X                     | X                     |                                    |                       |                   |                                    |       |                       |                       | X                     | X                                  |                     |                      |                                    |
| Six-minute Walk Test (6MWT)                           | X                      | X               |                     |                      |                      | X                     | X                     |                                    |                       |                   |                                    |       |                       |                       | X                     | X                                  |                     |                      |                                    |
| Range of Motion (ROM) – ankles                        | X                      | X               |                     |                      |                      | X                     | X                     |                                    |                       |                   |                                    |       |                       |                       | X                     | X                                  |                     |                      |                                    |
| Pediatric Outcomes Data Collection Instrument (PODCI) | X                      |                 |                     |                      |                      |                       |                       | X                                  |                       |                   |                                    |       |                       |                       |                       | X                                  |                     |                      |                                    |
| Treatment Satisfaction Questionnaire (TSQM)           |                        |                 |                     |                      |                      |                       |                       | X                                  |                       |                   |                                    |       |                       |                       |                       | X                                  |                     |                      |                                    |

| Study Day or Week/Visit                                          | Pretreatment Period    |                 | Treatment Period #1 |                             |                             |                              |                              |                                           |                       | Transition Period | Treatment Period #2                       |       |                              |                              |                              |                                           |                     | Dose-tapering Period |                                           |
|------------------------------------------------------------------|------------------------|-----------------|---------------------|-----------------------------|-----------------------------|------------------------------|------------------------------|-------------------------------------------|-----------------------|-------------------|-------------------------------------------|-------|------------------------------|------------------------------|------------------------------|-------------------------------------------|---------------------|----------------------|-------------------------------------------|
|                                                                  | SCR                    | BL              |                     |                             |                             |                              |                              |                                           |                       |                   |                                           |       |                              |                              |                              |                                           |                     |                      |                                           |
|                                                                  | Day                    |                 | Week                |                             |                             |                              |                              |                                           |                       |                   |                                           |       |                              |                              |                              |                                           |                     |                      |                                           |
|                                                                  | -33 to -2 <sup>a</sup> | -1 <sup>b</sup> | 1 <sup>c</sup>      | 2 ( $\pm 1d$ ) <sup>d</sup> | 6 ( $\pm 3d$ ) <sup>d</sup> | 12 ( $\pm 1w$ ) <sup>d</sup> | 18 ( $\pm 1w$ ) <sup>d</sup> | 24 <sup>e</sup> ( $\pm 1w$ ) <sup>d</sup> | 24 (F/U) <sup>e</sup> | 26                | 28 <sup>f</sup> ( $\pm 1d$ ) <sup>d</sup> | 28+1d | 30 ( $\pm 1d$ ) <sup>d</sup> | 34 ( $\pm 3d$ ) <sup>d</sup> | 40 ( $\pm 1w$ ) <sup>d</sup> | 48 <sup>g</sup> ( $\pm 1w$ ) <sup>d</sup> | 48 F/U <sup>g</sup> | 50                   | 52 <sup>h</sup> ( $\pm 1d$ ) <sup>d</sup> |
| PARS III                                                         | X                      |                 |                     |                             |                             | X                            | X                            | X                                         |                       |                   |                                           |       |                              |                              |                              | X                                         |                     |                      |                                           |
| Ease of Study Medication Administration Assessment <sup>bb</sup> |                        |                 |                     | X                           |                             | X                            |                              | X                                         |                       |                   |                                           |       | X                            |                              | X                            | X                                         |                     |                      |                                           |
| Blindedness Assessment                                           |                        |                 |                     |                             |                             |                              |                              | X                                         |                       |                   |                                           |       |                              |                              |                              |                                           |                     |                      |                                           |
| Dispense subject diaries <sup>cc</sup>                           |                        |                 | X                   | X                           | X                           | X                            | X                            | X                                         |                       |                   |                                           |       | X                            | X                            | X                            | X                                         |                     |                      |                                           |
| Return subject diaries                                           |                        |                 |                     | X                           | X                           | X                            | X                            | X                                         | X <sup>dd</sup>       |                   |                                           |       | X                            | X                            | X                            | X                                         | X <sup>ee</sup>     |                      | X                                         |
| AE/SAE recording <sup>ff</sup>                                   | X                      |                 |                     |                             |                             |                              |                              |                                           |                       |                   |                                           |       |                              |                              |                              |                                           |                     |                      | X <sup>gg</sup>                           |
| Concomitant medications                                          |                        |                 | X                   |                             |                             |                              |                              |                                           |                       |                   |                                           |       |                              |                              |                              |                                           |                     |                      | X                                         |
| Discharge from study                                             |                        |                 |                     |                             |                             |                              |                              |                                           |                       |                   |                                           |       |                              |                              |                              |                                           | X <sup>hh</sup>     |                      | X <sup>ii</sup>                           |

375 BL = Baseline; d = day(s); F/U = Follow-up; SCR = Screening; w = week.

- 376 a. The Pretreatment Screening Period spans Day -33 through Day -2, but all screening procedures must be completed by Day -11. Subjects meeting all eligibility  
 377 criteria will be randomized by Day -11, at least 10 days prior to the Baseline Day -1 Visit.
- 378 b. Baseline Day -1, within 24 hours prior to administration of the first dose of study drug.
- 379 c. Treatment Day 1 begins at the time of administration of the first dose of study medication in the clinic.
- 380 d. Time windows around the Week 2, Week 6, Week 12, Week 18, and Week 24 Visits are allowances from date of Day 1 Visit. Time window around the Week 28  
 381 Visit is allowance from date of Week 24 F/U Visit. Time windows around the Week 30, Week 34, Week 40, and Week 48 Visits are allowances from date of Week  
 382 28+1d Visit. Time window around the Week 52 Visit is allowance from date of Week 48 F/U Visit.
- 383 e. Subjects who prematurely discontinue from the study prior to Week 24 should complete the Week 24 assessments and the Week 24 Follow-up Visit ACTH  
 384 Stimulation Test at the time of early withdrawal and undergo Early Discontinuation Dose-tapering, where possible (see protocol Section **Error! Reference source**  
 385 **not found.** and Section **Error! Reference source not found.**). The Week 24 Follow-up Visit must occur to allow the ACTH Stimulation Test to be performed  
 386  $48 \pm 3$  hours after the final dose of Treatment Period #1 study medication.
- 387 f. Subjects who prematurely discontinue from the study after Week 24 but prior to Week 28 should complete the Week 28 assessments, and undergo Early  
 388 Discontinuation Dose-tapering, where possible (see protocol Section **Error! Reference source not found.**).
- 389 g. Subjects who prematurely discontinue from the study after Week 28 but prior to Week 48 should complete the Week 48 assessments and the Week 48 Follow-up  
 390 Visit ACTH Stimulation Test at the time of early withdrawal and undergo Dose-tapering, where possible (see protocol Section **Error! Reference source not found.**  
 391 and Section **Error! Reference source not found.**). The Week 48 Follow-up Visit must occur to allow the ACTH Stimulation Test to be performed  $48 \pm 3$  hours  
 392 after the final dose of Treatment Period #2 study medication.

- 393 h. Subjects will have one study site visit during the Dose-tapering Period, at one week after the dose of liquid formulation has been discontinued (Week 52) (see  
394 protocol Section **Error! Reference source not found.**).
- 395 i. Subjects are considered to be enrolled in the study at the time written informed consent is obtained.
- 396 j. Study eligibility should be rechecked and confirmed at Baseline Day -1 Visit.
- 397 k. Randomization occurs by Interactive Voice/Web Response System (IXRS) after subjects are confirmed to have met all study entry criteria, at least 10 days prior to  
398 the Baseline Day -1 Visit.
- 399 l. Weight recorded at the Week 18 Visit and the Week 40 Visit will be used to calculate doses for study drug dispensed at the Week 24 Follow-up and Week 48  
400 Follow-up Visits, respectively.
- 401 m. Sitting blood pressure, body temperature, respiratory rate, and heart rate.
- 402 n. Vital signs recorded prior to administration of the first dose of study drug at the Day 1 Visit.
- 403 o. Blood for hematology, chemistry, and lipids, including HbA1c and Vitamin D where applicable.
- 404 p. Blood samples (collected after subjects have fasted for  $\geq 6$  hours) and urine collected at scheduled visit, and prior to dose of study drug where applicable.
- 405 q. Urinalysis by dipstick and microscopic analysis.
- 406 r. Blood collected for PD biomarkers includes secondary safety outcomes (morning cortisol, osteocalcin, CTX1, P1NP), and exploratory safety and efficacy PD biomarkers.
- 407 s. Blood samples for PD biomarkers and fasting glucose and insulin determination will be collected after subjects have fasted for  $\geq 6$  hours, prior to the daily dose of study  
408 medication where applicable.
- 409 t. Subjects will return to the study site for the Week 24 Follow-up Visit for an ACTH Stimulation Test 48 hours  $\pm 3$  hours after administration of the final dose of  
410 Treatment Period #1 study medication, and for the Week 48 Follow-up Visit for an ACTH Stimulation Test 48 hours  $\pm 3$  hours after administration of the final dose  
411 of Treatment Period #2 study medication (see protocol Section **Error! Reference source not found.**).
- 412 u. Blood sample for population PK analysis will be collected 2 hours after administration of the daily dose of study medication.
- 413 v. 12-lead ECG recorded after subject has rested quietly in a supine position for at least 5 minutes.
- 414 w. Study medication brought by subjects to the Week 2 Visit and Week 30 Visit for dosing and compliance assessment will be redispensed to subjects at the end of the  
415 visit.
- 416 x. The dose of study medication on the days of the Day 1, Week 2, Week 12, Week 24, Week 28, Week 30, Week 40, and Week 48 Visits will be administered after 1)  
417 fasting blood draws; and 2) breakfast provided by the study site. All other doses will be taken at home. See protocol Section **Error! Reference source not found.**  
418 for other Day 1 pre-dose safety assessments.
- 419 y. Doses of tablet study drug will be tapered and suspension study drug will be continued, during Weeks 24-28.
- 420 z. Site study staff will contact the parent(s)/guardian(s) by telephone at Weeks 26 and 50 to ensure that the study drug tapering is proceeding according to protocol, to  
421 assess potential signs or symptoms indicative of adrenal suppression, and to address any questions the parent(s)/guardian(s) may have.
- 422 aa. North Star Ambulatory Assessment; includes the Time to Stand Test (TTSTAND).
- 423 bb. Ease of Study Medication Administration assessed at the Weeks 2, 12, and 24, 30, 40, and 48 Visits.
- 424 cc. Subject diaries used to record any changes in concomitant medications taken, any AEs experienced during the study, and any incomplete or missed doses of study  
425 medication.
- 426 dd. Subject diaries dispensed at the Week 24 Visit will be returned and redispensed at the Week 24 F/U Visit; final return will occur at the Week 28 Visit.

- 427 ee. Subject diaries dispensed at the Week 48 Visit will be returned at the Week 48 F/U Visit, and will be redispensed to subjects participating in the Dose-tapering Period for  
428 final return at the Week 52 Visit.
- 429 ff. All AEs and SAEs must be recorded in the source documents and eCRF from the date of the subject's written informed consent until the final Week 52 Visit or the  
430 subject's participation in the study is completed (SAEs through 30 days after final study drug dose). Ongoing AEs will be followed to resolution, stabilization, or until  
431 such time the Investigator agrees follow-up is not necessary.
- 432 gg. For subjects who do not continue to receive vamorolone through an additional vamorolone study or general access program, site staff will make a phone call to the home  
433 31-35 days after the final dose of study medication in VBP15-004 Dose-tapering Period to confirm the final SAE status of the subject.
- 434 hh. Subjects who elect to continue vamorolone therapy by enrolling directly into an additional vamorolone study or general access program may be discharged from the  
435 study following completion of all final Week 48 assessments, including the Week 48 Follow-up Visit ACTH Stimulation Test.
- 436 ii. Subjects who participate in the Dose-tapering Period may be discharged from the study following completion of all final Dose-Tapering Visit assessments (Week 52)  
437 (see protocol Section 6.3.7).
- 438
- 439
- 440

441           **5.2.           Inclusion – Exclusion Criteria and General Study Population**

442       Approximately 15 or 30 subjects with confirmed diagnosis of DMD (4-<7 years of age) will  
443       be randomized into each of the six groups (120 subjects total) (Table 1). The inclusion and  
444       exclusion criteria defined in the protocol apply to all subjects and are not repeated herein the  
445       SAP.

446           **5.3.           Randomization and Blinding**

447       Following consent and review of study entry criteria to confirm subject eligibility for the  
448       study, the subject can be randomized to treatment. Randomization should be performed at  
449       least 10 days prior to the baseline visit and will be achieved via the Interactive Voice/Web  
450       Response System (IXRS) system with username and password access. Randomization will be  
451       stratified by participant's age at study entry (<6 vs. ≥ 6 years). Randomization will be  
452       stratified only by age; randomization will not be stratified by investigational site.  
453       Randomization will require the site investigator, or designee, to verify that the subject meets  
454       the inclusion/exclusion criteria of the study, and to verify that the child has not previously  
455       been randomized. Randomization for both Period #1 and Period #2 will be performed prior to  
456       study start.

457           **5.4.           Analysis Variables**

458       Variables to be analyzed include demographics and baseline characteristics, safety variables,  
459       and efficacy variables. Derived variables from study endpoints are described with the  
460       sections describing the analyses for these endpoints.

461       Unless otherwise noted, baseline is defined as the last measurement taken prior to first  
462       exposure to study drug, including Day 1 measurements taken pre-dosing.

463

464

465 **6. SAMPLE SIZE**

466 This is a randomized, double-blind, parallel group, placebo- and active-controlled study.  
467 Study medication is administered daily in this Phase IIb trial. Data for untreated subjects  
468 from the Cooperative International Neuromuscular Research Group (CINRG) Duchenne  
469 Natural History Study (Bellow et al., 2015; Spurney et al., 2014; McDonald et al., 2013; and  
470 Henricson et al., 2013) and data for prednisone treated subjects from the CINRG Prednisone  
471 study (Escolar et al., 2011) were used to help estimate sample sizes for this study.  
472

473 Note that subjects in the prednisone and placebo groups will actually be randomized into two  
474 groups each:  
475

- 476 • Prednisone 0.75 mg/kg/day → Vamorolone 2.0 mg/kg/day (n=15);
- 477 • Prednisone 0.75 mg/kg/day → Vamorolone 6.0 mg/kg/day (n=15);
- 478 • Placebo → Vamorolone 2.0 mg/kg/day (n=15); or
- 479 • Placebo → Vamorolone 6.0 mg/kg/day (n=15).

480

481 These groups will be pooled by initial treatment (prednisone or placebo) for the Treatment  
482 Period #1 analyses.  
483

484 If subjects withdraw early from the study in Period #1, additional subjects may be enrolled to  
485 achieve approximately 120 subjects completing the Week 24 Visit assessments. Subjects  
486 withdrawing during Period 2 will not be replaced.  
487

488 Analysis method:

489 In the 24-week vamorolone dose-ranging study (VBP15-003) (Hoffman et al., 2019), doses  
490 of 0.25 and 0.75 mg/kg/day showed little evidence of clinical benefit, whereas doses of 2.0  
491 and 6.0 mg/kg/day both showed clear evidence of clinical benefit. The effect size of clinical  
492 efficacy depended on the motor outcomes measure (TTSTAND, TTRW, TTCLIMB, 6MWT  
493 and NSAA).  
494

495 More recently acquired data on 18-month treatment with vamorolone at 2.0 or 6.0 mg/kg/day  
496 (data from subjects who were in the 24-week VBP15-003 study and continued into VBP15-  
497 LTE, with dose escalations to either 2.0 mg/kg/day or 6.0 mg/kg/day [dose escalation and de-  
498 escalation were permitted in VBP15-LTE] and have a 12-month data assessment in VBP15-  
499 LTE) have suggested that both the 2.0 and 6.0 mg/kg/day doses show long-term benefit that  
500 is comparable to that seen with glucocorticoids (prednisone and deflazacort) (Smith et al.,  
501 2020).  
502

503 In consideration of having the primary efficacy endpoint be the comparison of 6.0 mg/kg/day  
504 vamorolone versus placebo in VBP15-004, sample size calculations were performed using

505 data from vamorolone-treated subjects from the VBP15-002/VBP15-003 24-week treatment  
 506 period. The analysis compared TTSTAND velocity from the combined 2.0 and 6.0  
 507 mg/kg/day groups (drug treated, Group A) to the combined 0.25 and 0.75 mg/kg/day  
 508 (pseudo-placebo; Group B).

509  
 510 LS means from the MMRM modeling of VBP15-002/VBP15-003 24-week data were used as  
 511 parameter estimates of the population means in the sample size calculations for the  
 512 comparison of the Treatment Group (2.0 + 6.0 mg/kg/day) vs. the Pseudo-Placebo Group  
 513 (0.25 + 0.75 mg/kg/day) on the mean change from baseline at Week 24. For the estimates of  
 514 standard deviations within each comparison group, simple descriptive statistics from the  
 515 VBP15-002/VBP15-003 24-week data were used. We then estimated power using two-sided  
 516 t-tests assuming unequal variance, with  $\alpha = 0.05$ .

517  
 518 The following table shows the resultant estimated power for various sample sizes per  
 519 comparison group for comparing the Treatment Group (2.0 + 6.0 mg/kg/day) vs. the Pseudo-  
 520 Placebo Group (0.25 + 0.75 mg/kg/day) on the mean change from baseline at Week 24 for  
 521 the alternative hypothesis that  $H_1: \mu_1 \neq \mu_2$  assuming an alpha level of 0.05 and parameter  
 522 estimates from the analyses described above for TTSTAND velocity:

523

| Sample Size per Comparison Group | $\mu_1$ (Pseudo-Placebo) | $\mu_2$ (Treatment Group) | $\sigma_1$ (Pseudo-Placebo) | $\sigma_2$ (Treatment Group) | Estimated Power |
|----------------------------------|--------------------------|---------------------------|-----------------------------|------------------------------|-----------------|
| 25                               | -0.0052                  | 0.0450                    | 0.0628                      | 0.0530                       | 84.89%          |
| 28                               | -0.0052                  | 0.0450                    | 0.0628                      | 0.0530                       | 88.76%          |
| 30                               | -0.0052                  | 0.0450                    | 0.0628                      | 0.0530                       | 90.81%          |

524

525 The sample size of 25 per treatment group for 2.0 mg/kg/day, 6.0 mg/kg/day, prednisone, and  
 526 placebo will result in a total enrollment of 100 subjects which will provide approximately  
 527 85% power at alpha level 0.05 to detect a statistically significant difference between 6.0  
 528 mg/kg/day and placebo on TTSTAND velocity at Week 24. Similarly, a total enrollment of  
 529 120 subjects (30 per treatment group) will provide approximately 91% power at alpha level  
 530 0.05 to detect a statistically significant difference between 6.0 mg/kg/day and placebo on  
 531 TTSTAND velocity at Week 24.

532

533



534 **7. GENERAL CONSIDERATIONS**

535 **7.1. Analysis Populations**

536 Three populations will be defined for data analysis: the Safety Population, the modified  
537 Intent-to-Treat Population, and the Per Protocol Population.

538

539 **7.1.1. Safety Population**

540 All subjects who receive at least one dose of study medication will be included in the Safety  
541 Population. The Safety Population is the primary analysis population for safety and PD  
542 assessments. Results will be presented “as treated.”

543 **7.1.2. Modified Intent-to-Treat (mITT) Population**

544 All subjects who receive at least one dose of study medication and have at least one  
545 TTSTAND, TTRW, TTCLIMB, 6MWT, NSAA, myometry, or ROM post-baseline efficacy  
546 assessment will be included in the mITT Population. The mITT Population is the primary  
547 analysis population for clinical efficacy. Subjects who receive at least one dose but never  
548 have any of the aforementioned post-baseline efficacy assessments will be excluded. Results  
549 will be presented “as randomized.”

550 **7.1.3. Per Protocol Population**

551 The Per Protocol (PP) Population will be those subjects in the mITT Population who had no  
552 major protocol deviations and will be the secondary analysis population for analysis of the  
553 efficacy data. Exclusion of subjects from the PP Population will be made on a subject-by-  
554 subject basis prior to database soft lock at the end of the 24-week treatment period.

555 The patients with major violations impacting the evaluation of the primary endpoint  
556 (TTSTAND velocity) will be excluded from the PP Population. The major violations include  
557 the following:

- 558
- 559 • Patient discontinues the study without completing the Week 24 assessment of TTSTAND  
560 velocity
  - 561 • Patient has missing TTSTAND velocity data at Week 24 due to the COVID-19 pandemic  
or due to other reasons.

562

563           **7.2.           Covariates and Subgroups**

564   **7.2.1. Planned Covariates**

565 Covariates will include Baseline response and age group.

566   **7.2.2. Subgroups**

567 Descriptive summary statistics for TTSTAND velocity will be presented by 3 subgroups:  
568 baseline age <=5.0 years vs. >5.0 years; baseline age <=6.0 years vs. >6.0 years; and  
569 TTSTAND seconds at baseline <=5.0 seconds vs. >5.0 seconds.

570

571           **7.3.           Management of Analysis Data**

572   **7.3.1. Data Handling**

573 For the summary of continuous values, and laboratory shift tables and ECG and 2D-echo  
574 interpretation and Eye examination, unscheduled tests will be included with the time of the  
575 nearest regularly scheduled test. If there is a scheduled test and one or more unscheduled  
576 tests assigned to the same time point, the most conservative test (i.e., a test with low or high  
577 results or a test with abnormal results) will be used, unless on review, the medical monitor  
578 determines that the most conservative test result was spurious. Repeated tests will be  
579 included only if they reflect abnormal (low or high) results and the corresponding original  
580 results are normal.

581 All laboratory values and ECG results, for all visits, will be provided in by-subject listings.

582   **7.3.2. Missing Data**

583 Every effort will be made to collect all data. However, despite best efforts, missing or  
584 incomplete data may be reported. All missing or partial data will be presented in the subject  
585 data listing, as they are recorded on the eCRF.

586 The COVID-19 pandemic necessitated changes in the protocol to avoid unnecessary potential  
587 exposure of subjects to coronavirus and resulted in particular safety and efficacy assessments  
588 being made optional. As a result, there are multiple occurrences of missing data. The data  
589 that are missing due to COVID-19 will primarily be considered to be missing at random in  
590 the respective sensitivity analyses. Subjects that are determined to have an appreciable  
591 amount of missing data due to the COVID-19 pandemic may be excluded from the Per  
592 Protocol Population. See [Section 7.3.2.3](#) for additional sensitivity analyses that will be  
593 performed for the primary efficacy endpoint.

594 For subjects with missing or incomplete data, all available data will be included in statistical  
595 presentations. Unless otherwise specified (e.g., primary endpoint sensitivity analysis), in  
596 general no imputation of values for missing data will be performed.

597 7.3.2.1. Handling of Missing Date Values

598 Partial or Missing Dates

599 The following conventions will be used to impute missing portions of dates for adverse  
600 events and concomitant medications, if warranted. Note that the imputed values outlined here  
601 may not always provide the most conservative date. In those circumstances, the imputed  
602 value may be replaced by a date that will lead to a more conservative analysis.

603 A. Start Dates

- 604 1) If the year is unknown, then the date will not be imputed and  
605 will be assigned a missing value.
- 606 2) If the month is unknown, then:  
607 i) If the year matches the first dose date year, then impute  
608 the month and day of the first dose date.  
609 ii) Otherwise, assign ‘January.’
- 610 3) If the day is unknown, then:  
611 i) If the month and year match the first dose date month  
612 and year, then impute the day of the first dose date.  
613 ii) Otherwise, assign the first day of the month.

614 B. Stop Dates

- 615 1) If the year is unknown, then the date will not be imputed and  
616 will be assigned a missing value.
- 617 2) If the month is unknown, then assign ‘December.’
- 618 3) If the day is unknown, then assign the last day of the month.

619

620 7.3.2.2. Imputation Methods

621 The primary analyses for the primary and secondary efficacy variables will be conducted on  
622 observed data only; the MMRMs will employ appropriate covariance structures to  
623 accommodate missing data as described in [Section 7.6](#). Missing efficacy data will be imputed  
624 for sensitivity analyses on the primary and secondary efficacy endpoints using the following  
625 methods:

- 626 • Multiple Imputations using Markov Chain Monte Carlo (MCMC); and
- 627 • Multiple Imputations using a Control-based Pattern Mixture Model (PMM).

628 The pattern and type of missing data will be summarized by visit. For each visit, the data will  
629 be classified as available, or missing. The missing data will be further classified as  
630 intermittent (missing value is followed by an observed value) or as measurement dropouts  
631 (all subsequent values after the missing value are missing). The intermittent missing data will

632 be further classified as missing due to COVID-19 or due to other reasons. The measurement  
633 dropouts will be further classified as inability of the subject to perform or complete the test  
634 due to disease-related disability, due to COVID-19, or due to other reasons. Once a subject is  
635 no longer able to perform or complete a test due to disability, all subsequent values to the  
636 missing values are missing. In conversion to velocity, all missing values due to inability to  
637 perform the test are imputed as “0” (this imputation is included in the endpoint analyses on  
638 TTSTAND velocity, TTRW velocity, and TTCLIMB velocity, and is carried out prior to the  
639 MCMC and PMM imputation for the sensitivity analyses of the primary endpoint TTSTAND  
640 and secondary endpoint TTRW velocity). The number and proportion of subjects in each  
641 category will be summarized by visit.  
642

643 MCMC (assuming data are missing at random- primary efficacy endpoint only, using all  
644 subjects):

645 For multiple imputations (MI) using MCMC, 1000 “complete” (imputed) datasets will be  
646 produced and analyzed using all subjects (i.e., subjects without post-baseline assessments  
647 will be included in this MCMC imputation modeling). The MCMC imputation will be  
648 performed within treatment group and include variables for age at baseline, and response at  
649 baseline, Week 6, Week 12, and Week 24 (note that age is included as a surrogate for the  
650 randomization factor age group because the MCMC imputation in Proc MI assumes a  
651 multivariate normal distribution). After obtaining 1000 “complete” datasets of response  
652 values, change from baseline will be calculated, and each of these 1000 datasets will be  
653 analyzed using the MMRM described in [Section 7.6](#) for the primary efficacy endpoint (i.e.,  
654 the MMRM will be employed for each imputation separately on change from baseline).  
655 PROC MIANALYZE will then be used to combine the results across imputations. The SAS  
656 Proc MI code for performing this MCMC imputation is provided here:

```
657  
658 proc mi data=tadft out=tadftmcmcl seed=5346434 minimum=0 nimpute=1000;  
659     by treatment;  
660     mcmc chain=multiple impute=full;  
661     var age baseline week_6 week_12 week_24;  
662 run;  
663 *****  
664 MINIMUM=0 sets a lower limit on imputed values.  
665 NIMPUTE specifies the number of fully imputed datasets to create.  
666 BY statement requires imputation to be done within treatment group.  
667 VAR statement lists variables in model, including response at each visit.  
668
```

669 Note: if any of the treatment levels has no missing data, the data from the treatment level in  
670 question will be excluded from the PROC MI procedure above (using WHERE statement). If  
671 this is done, the observed data from the treatment level in question (without any missing  
672 data) will be added to the output dataset produced above 1000 times, i.e. once for each round  
673 of imputation.

674 Control-based PMM (assuming data are missing not at random- primary and secondary  
675 efficacy endpoints using mITT population):

676 The primary efficacy analysis model (MMRM) makes the assumption that missing data are  
677 “missing at random” (MAR). When data are MAR, the missingness of the data does not  
678 depend on the missing value after conditioning on the observed data (i.e., prior assessments  
679 and baseline covariates). Note that when the missingness of the data depends on the values of  
680 the missing variables after conditioning on the observed data, the data are called “missing not  
681 at random” (MNAR). In order to assess the MAR assumption, a control-based PMM will be  
682 utilized following the method discussed in Ratitch and O’Kelly (2011) for the primary  
683 efficacy endpoint. For this study, missing data due to COVID-19 is always assumed to be  
684 MAR. For the remaining missing data, assumption of MNAR will be used as shown below,  
685 using Copy-Reference imputation.

686 The following provides an overview, followed by a detailed description, of the imputation  
687 and analysis steps.

- 688 1. Imputation of all intermittent missing data with MI assuming MAR, in order to  
689 generate a dataset with monotone missing data structure.
- 690 2. Based on dataset generated in Step 1: imputation of all monotone missing data  
691 with MI assuming MAR, in order to generate dataset with no missing data.
- 692 3. Based on dataset generated in Step 2 (with no missing data): all visits that have  
693 monotone missing data that are not due to COVID-19 will be set back as missing.
- 694 4. Based on dataset generated in Step 3: imputation of remaining monotone missing  
695 data (not related to COVID-19) with multiple imputation assuming MNAR  
696 (Copy-Reference imputation).
- 697 5. Based on dataset generated in Step 4: analysis of imputed data with MMRMs.
- 698 6. Combination of results from the MMRMs.

### 699 **Step 1: Imputation of intermittent missing data**

700 MI techniques will be applied in the mITT analysis set. For patients with intermittent missing  
701 values, a monotone missingness pattern will be generated. Intermittent missing values will be  
702 imputed using the MCMC methodology which assumes a multivariate normal distribution  
703 over all variables included in the imputation model. The MI procedure in SAS will be used  
704 for this purpose and this first MI step will be repeated 1000 times, generating 1000 different  
705 datasets with a monotone missing data structure. A random seed value will be used in the MI  
706 procedure and documented in this SAP, to allow replication of the analysis. Seed value of  
707 5346434 will be used. The imputation is based on the MAR assumption, i.e. the missing data  
708 are assumed to follow the same model as the other patients in their respective treatment arm.  
709 Age is included as a factor in the model because the randomization is stratified by age.

710 The following SAS code will be used to generate the monotone missing data pattern:

```
711 proc mi data=&data out=datamono nimpute=1000 seed=5346434 minimum=0;  
712 by trtp;  
713 var age base w6 w12 w24;
```

```
714 mcmc chain=multiple impute=monotone;  
715 run;
```

### 716 **Step 2: Imputation of all monotone missing data**

717 Using the dataset generated in Step 1, all remaining missing data will be imputed based on  
718 the assumption of MAR. The following SAS code will be used for the imputation assuming  
719 MAR.

```
720 proc mi data=monotone out=imputed1 nimpute=1 seed=5346434 minimum=0;  
721 class trtp;  
722 by _imputation_;  
723 var age base w6 w12 w24;  
724 monotone regression;  
725 run;
```

### 726 **Step 3: Setting monotone missing data that are not due to COVID-19 back as missing**

727 After Step 2, information on reason for missing data (by patient and visit) will be merged to  
728 the dataset that contains no missing data. Within each patient, data from the visits that have  
729 monotone missing data with a reason for missing that are not due to COVID-19 will be set  
730 back as missing.

731

732 The reason for missing data (by patient and visit) will be determined as follows:

- 733 • According to the “VBP15-004 eCRF Guidelines Addendum for COVID-19 Protocol  
734 Clarification V.1.0”, sites were instructed to report the reason for not performing an  
735 assessment due to COVID-19 as “Other” and then provide a COVID-19 related  
736 reason as free text. If this free text field includes the string “COVID”, the reason will  
737 be classified as being due to COVID-19. If the free text does not include the string  
738 “COVID”, the reason will be classified as other. Before conducting this classification,  
739 the free text field will be checked for any possible spelling errors.

740

### 741 **Step 4: Imputation of remaining (non-COVID-19 related) missing data with assumption 742 of MNAR**

743 The dataset generated in Step 3 (which contains monotone missing data) will be imputed  
744 based on the assumption of MNAR, using Copy-Reference imputation. The MNAR  
745 imputation will be based on trajectories in the placebo group, i.e. data from the placebo group  
746 only will be used to generate the imputations. For this, the MNAR statement will be used as  
747 described below.

```
748 proc mi data=imputed2 out=imputed3 nimpute=1 seed=5346434 minimum=0;  
749 class trtp;  
750 by _imputation_;  
751 var age base w6 w12 w24;  
752 monotone regression;  
753 mnar model(w6 w12 w24 / modelobs=(trtp='Placebo'));  
754 run;
```

755 **Step 5: Analysis of imputed data with MMRM**

756 After the missing data imputation is completed using the above steps, change from baseline  
757 values will be calculated in each of the imputed datasets at each visit. These 1000 datasets  
758 will be analyzed using the MMRM described in [Section 7.6](#) for the primary efficacy  
759 endpoint. Treatment effects (difference in least squares [LS] means between treatments) from  
760 these 1000 analyses will then be combined using Rubin's Method via the SAS PROC  
761 MIANALYZE procedure for each endpoint.

762 7.3.2.3. Assessment of impact of COVID-19 on the primary endpoint

763 The following COVID-19 related potential data issues will be addressed with additional  
764 sensitivity analyses:

- 765 • Impact of assessments that are missing or delayed due to COVID-19
- 766 • Impact of alternative assessment methods (motor assessment using video assessment  
767 method).

768 In both these sensitivity analyses, the data that are missing (or set as missing) due to COVID-  
769 19 are assumed to be missing at random (MAR), while the other missing data are assumed to  
770 be missing not at random (MNAR) (Meyer et al., 2020).

771 **Sensitivity analysis assessing the impact of assessments that are missing or delayed due**  
772 **to COVID-19**

773 In this sensitivity analysis, the assessments that were early or delayed by more than 21 days  
774 from the scheduled visit date due to COVID-19 will be set as missing. Scheduled visit date  
775 will be calculated from the first dose date. In case there is no documentation of whether the  
776 rescheduling by more than 21 days occurred is due to COVID-19 or due to other reasons, it  
777 will be classified as being due to COVID-19. After this step, all missing data will be  
778 categorized as being due to COVID-19 (either missing or set as missing due to delay) or  
779 being due to other causes. In this sensitivity analysis, the data assessed with alternative  
780 assessment methods will be treated as non-missing. The control-based PMM modelling  
781 approach defined in Section 7.3.2.2 will be used for this analysis.

782 **Sensitivity analysis assessing the impact of alternative assessment methods**

783 In this sensitivity analysis, the assessments that were performed using alternative methods  
784 (i.e., video assessments) due to COVID-19 will be set as missing. After this step, all missing  
785 data will be categorized as being missing due to COVID-19 (including alternative assessment  
786 methods) or being missing due to other causes (including the remaining missing data for any  
787 reason). Note that the data from visits that were delayed due to COVID-19 will be treated as  
788 non-missing. The control-based PMM modelling approach defined in Section 7.3.2.2 will be  
789 used for this analysis.

790

791 **7.3.3. Handling of Early Termination Visit Information**

792 In the event that a subject is terminated early from this study, the early termination visit data  
793 will be analyzed at the closest scheduled visit where the assessments are to be measured. If  
794 the closest scheduled visit has valid data, the early termination data will be assigned to the  
795 next available scheduled visit where the assessments are to be measured.

796 **7.3.4. Pooling of Investigational Sites**

797 The data from all study centers will be pooled together for analyses.

798 **7.3.5. Coding Conventions for Events and Medications**

799 All adverse events, and medical history will be mapped to the Medical Dictionary for  
800 Regulatory Activities (MedDRA version 20.0 or later) system for reporting (preferred term  
801 and body system).

802 Prior and Concomitant medications will be coded using World Health Organization (WHO)  
803 Drug classification (Version 01 JUN 2017 or later).

804 **7.3.6. Baseline Visits**

805 Unless otherwise noted, Baseline will be the last response before first dose of study  
806 medication. For example, labs taken over multiple days for the Day 1 visit for a participant  
807 where there is not a complete Day 1 pre-dose lab panel completed at a single date will use  
808 individual labs taken closest to, but prior to, first dose as baseline.

809 **7.3.7. Calculating Derived Variables**

810 Age in years will be calculated as (informed consent date – birth date)/365.25. In case a  
811 patient has multiple informed consent dates, the date closest to and prior to baseline (i.e. the  
812 latest date) will be used.

813 Efficacy Measures

814 TTSTAND, TTRW, AND TTCLIMB in seconds, 6MWT in meters, NSAA subscores, hand-  
815 held myometry, and ROM are captured directly via CRF. However, TTSTAND, TTCLIMB,  
816 and TTRW velocity results will be converted from seconds to velocities using the following  
817 formulas

- 818 • TTSTAND velocity =  $1 / \text{TTSTAND}$  and is expressed as rises/sec
- 819 • TTCLIMB velocity =  $1 / \text{TTCLIMB}$  and is expressed as tasks/sec
- 820 • TTRW velocity =  $10 / \text{TTRW}$  and is expressed as meters/sec



821 Velocity will be set to 0 for responses determined to be missing due to disease progression  
822 (inability to do the test). Moreover, at the first visit a subject cannot perform the test due to  
823 disease progression, and at ALL subsequent visits, the raw score will be left as missing, and  
824 velocity will be imputed as 0. Note that a subject cannot have a missing response due to  
825 disease progression followed by visits with non-missing responses. In this scenario, the  
826 missing response will not be considered missing due to disease progression. Furthermore, the  
827 CRF captures missing due to disease progression in some cases explicitly as missing due to  
828 “Disease progression”. Also, subjects with TTSTAND graded as “Unable to stand from  
829 supine, even with use of chair” or “Assisted Gowers” will have that test and all later test  
830 velocities imputed as 0 due to disease progression. Similarly, subjects with TTRW graded as  
831 “Unable to walk independently” or “Unable to walk independently but can walk with knee-  
832 ankle-foot or support from a person” will have that test and all later test velocities imputed as  
833 0 due to disease progression. And subjects with TTCLIMB graded as “Unable to climb 4  
834 standard stairs” will have that test and all later test velocities imputed as 0 due to disease  
835 progression. Note that for the primary and secondary analyses, velocity is imputed as  
836 described here only for unmissed subject visits. For example, if a subject discontinued the  
837 study at Week 12, and was unable to perform these tests at that visit due to disease  
838 progression, this subject would not have Week 24 velocity imputed.

839 For elbow flexors and knee extensors, hand-held myometry measurements were collected  
840 unilaterally using the dominant side, if known. The best of 3 collected test results at each  
841 visit will be summarized.

842 NSAA total score is calculated as the sum of all NSAA subscores only when none of the  
843 subscores are missing.

844

#### 845 Safety Measures

846 For BMI Z-scores, the following computational example given age and sex for children aged  
847 2 to 20 years uses the algorithm presented on the Centers for Disease Control and Prevention  
848 (CDC) webpage “Percentile Data Files with LMS Values”. For a detailed discussion on the  
849 derivation of the computational algorithm and reference materials, visit the webpage at  
850 [https://www.cdc.gov/growthcharts/percentile\\_data\\_files.htm](https://www.cdc.gov/growthcharts/percentile_data_files.htm). To obtain the Z-score (Z) for a  
851 given BMI measurement X, use the following equation:

$$852 Z = [(X/M)^L - 1] / (LS), \text{ where } L \neq 0$$

853 or

$$854 Z = \ln(X/M)/S, \text{ where } L=0$$

855 where L, M, and S are the values from the BMIAGE.xls reference table (growth chart 8  
856 linked to on the aforementioned CDC webpage).

857 For example, for a 24-month-old male (coded sex value = 1) who has a BMI of 17.2864, the  
858 BMIAGE.xls reference table presents values of L=-2.01118, M=16.57503, and S=0.080592.  
859 Plugging those parameter values into the Z formula above results in a Z-score of 0.5.

860 For height percentiles, the same computational formula for Z provided above in the BMI Z-  
861 score example is used. However the reference table, given age and sex for children aged 2 to  
862 20 years, is the STATAGE.xls reference table (Stature-for-age charts, 2 to 20 years, LMS  
863 parameters and selected smoothed stature percentiles in centimeters, by sex and age at  
864 webpage “Percentile Data Files with LMS Values”  
865 [https://www.cdc.gov/growthcharts/percentile\\_data\\_files.htm](https://www.cdc.gov/growthcharts/percentile_data_files.htm)). Once the Z-score is calculated,  
866 the percentile is then derived from the standard normal cumulative distribution.

867

868 For DXA scan data, 9 endpoints will be presented. Three of the 9 endpoints are derived  
869 endpoints, which use the following formulas:

- 870 • Total body composition fat-free mass (g) = total body bone mineral content (BMC)  
871 (g) + total body lean mass (g)
- 872 • Total body composition lean mass index ( $\text{kg}/\text{m}^2$ ) = (total body BMC + total body lean  
873 mass) / height<sup>2</sup> (note that total body lean mass and total body BMC must be converted  
874 to kg, and height must be converted to m for this formula)
- 875 • Total body composition fat mass index ( $\text{kg}/\text{m}^2$ ) = total body fat mass / height<sup>2</sup> (note  
876 that total body fat mass must be converted to kg, and height must be converted to m  
877 for this formula)

#### 878 Exploratory Measures

879 The TSQM Version II has 11 items, resulting in four specific domains of Effectiveness, Side  
880 Effects, Convenience, and Global Satisfaction. Scores for each domain are computed by  
881 adding the TSQM items in each domain and then transforming the composite score into a  
882 value ranging from 0 to 100. Of note, a score can be computed for a domain only if no more  
883 than one item is missing from that domain. The calculations specific to each domain are  
884 presented in detail below.

- 885 • Global Satisfaction  
886  $([\text{Sum}(\text{Item 10 to Item 11}) - 2] \text{ divided by } 12) * 100$

887 *If one item is missing*

$$888 \quad ([(\text{Use the completed item}) - 1] \text{ divide by } 6) * 100$$

- 889 • Effectiveness  
890  $([(\text{Item 1} + \text{Item 2}) - 2] \text{ divide by } 12) * 100$   
891 *If one item is missing*  
892  $([(\text{Use the completed item}) - 1] \text{ divide by } 6) * 100$   
893

- 894 • Side Effects  
895 *All ‘NA’ responses are coded as ‘5’ indicating ‘Not at all Dissatisfied’*  
896  $([\text{Sum}(\text{Item 4 to Item 6}) - 3] \text{ divide by } 12) * 100$   
897 *If one item is missing*

898  $(((\text{Sum}(\text{the two completed items})) - 2] \text{ divide by } 8) * 100$

899

900 • Convenience

901  $([\text{Sum}(\text{Item 7 to Item 9}) - 3] \text{ divided by } 18) * 100$

902 *If one item is missing*

903  $(((\text{Sum}(\text{the two completed items})) - 2] \text{ divided by } 12) * 100$

904

905 The PARS III (Stein R et al., 1990) is a brief parent-completed measure of psychosocial  
906 adjustment composed of 28 questions. The PARS III includes 6 psychosocial subscales (Peer  
907 Relations, Dependency, Hostility, Productivity, Anxiety/Depression, and Withdrawal) and a  
908 Total Score. The 4 PARS III subscales for Peer Relations, Dependency, Anxiety and  
909 Depression, and Withdrawal will be calculated and analyzed in this SAP using the sum of the  
910 score of the questions for each subscale. All 28 questions use a 4-point interval rating scale,  
911 ranging from 1 = “never or rarely” to 4 = “always”. For calculating subscales, some  
912 questions are recoded so that higher scores always indicate better adjustment.  
913 Hostility and Productivity are not measured as they have not shown changes in DMD  
914 populations, and Total Score will not be analyzed. If a 4-item subscale is missing more than  
915 one item or a 6-item subscale is missing more than two items, it will not be scored. If less  
916 than one or two items, respectively, is missing, the subscale will be scored by replacing the  
917 missing item with the subject's mean of the non-missing items for that subscale.

918

919 The questions summed for each subscale presented in this SAP are as follows:

920 Peer Relations

- 921 • Spent time with friends?
- 922 • Made friends without difficulty?
- 923 • Joined others of own accord?
- 924 • Had many different friends?

925

926 Dependency

- 927 • Wanted help in things he could have done on own?
- 928 • Been unable to decide things for self?
- 929 • Asked for help when could have figured things out?
- 930 • Asked unnecessary questions instead of working on own?

931

932 Anxiety and Depression

- 933 • Complained about problems?
- 934 • Seemed restless, tense?
- 935 • Said people didn't care about him?
- 936 • Seemed sad?
- 937 • Said he couldn't do things right?
- 938 • Acted afraid or apprehensive?

939

940 Withdrawal

- 941 • Sat and stared without doing anything?
- 942 • Appeared listless and apathetic?
- 943 • Seemed unaware of things going on around?
- 944 • Shown little interest in things, had to be pushed into activity?

945

946 For PODCI subscale Upper Extremity and Physical Function, the following 8 questions will  
947 be summed to provide a raw score where a minimum of 4 question responses must be non-  
948 missing and valid:

- 949 • Lift heavy books?
- 950 • Pour a half gallon of milk?
- 951 • Open a jar that has been opened before?
- 952 • Use a fork and spoon?
- 953 • Comb his hair?
- 954 • Button buttons?
- 955 • Write with a pencil?
- 956 • Turn doorknobs?

957 The standardized Upper Extremity and Physical Function score is calculated as [(4 - mean of  
958 non-missing questions used to calculate the raw score) / 3] \* 100. Note that response scores  
959 of 5 indicate that the subject was too young for the activity and are set to missing by Data  
960 Management when calculating the subscale score (see POSNA (PODCI) Child Proxy  
961 Scoring Outcomes Instrument).

962

963 For PODCI subscale Transfers and Basic Mobility, the following 11 questions will be  
964 summed to provide a raw score where a minimum of 7 question responses must be non-  
965 missing and valid:

- 966 • Put on his coat?
- 967 • Climb one flight of stairs?
- 968 • Walk one block?
- 969 • Get on and off a bus?
- 970 • Stand while washing his hands and face at a sink?
- 971 • Sit in a regular chair without holding on?
- 972 • Get on and off a toilet or chair?
- 973 • Get in and out of bed?
- 974 • Bend over from a standing position and pick up something off the floor?
- 975 • How often does your child need help from another person for sitting and standing?
- 976 • How often does your child use assistive devices (such as braces, crutches, or  
977 wheelchair) for sitting and standing?

978

979 The standardized Transfers and Basic Mobility score is calculated as [(4 - mean of non-  
980 missing questions used to calculate the raw score) / 3] \* 100. Note that the responses to the  
981 last 2 questions are rescaled if used in calculating the sum and standardize score as follows:  
982 rescaled = [(response - 1) \* 3/4] + 1. Note that response scores of 5 indicate that the subject

983 was too young for the activity and are set to missing by Data Management when calculating  
984 the subscale score (see POSNA (PODCI) Child Proxy Scoring Outcomes Instrument).  
985

#### 986 **7.3.8. Analysis Software**

987 Data manipulation, tabulation of descriptive statistics, and graphical representations will be  
988 performed primarily using SAS (release 9.4 or higher) for Windows. If the use of other  
989 software is warranted, the final clinical study report will detail what software was used and  
990 for what purposes.

#### 991 **7.3.9. Study Data**

992 Study data identified in the schedule for time and events (Table 2 Schedule of Study  
993 Activities) are collected, and source verified, on the electronic data capture tool:  
994 OpenClinica. Laboratory data, including PK and PD test results, are not collected in the EDC  
995 tool and are provided from external laboratories.

996 All study data will be formulated into regulatory compliant data sets to provide transparency,  
997 traceability, and integrity of trial analysis results from the collection source. Observed study  
998 data will be mapped to the CDISC Study Data Tabulation Model (SDTM) and serve as the  
999 source data from the trial (note that any hardcoding of data will be captured in notes-to-file  
1000 requiring Sponsor approval and detailed in the relevant reviewer guide). All study analyses  
1001 will be completed using analysis data sets that are derived from the SDTM and follow the  
1002 CDISC Analysis Data Model (ADaM) architecture.

1003 The methods for programming the CDISC SDTM and ADaM data sets in this SAP are  
1004 described in Figure 1. Note that the methods described here for Period #1 may need to be  
1005 modified in order to incorporate the 2 periods of the study in the whole Study SAP.

1006 **Figure 1** **SDTM, ADaM, and TFL Development and Validation**

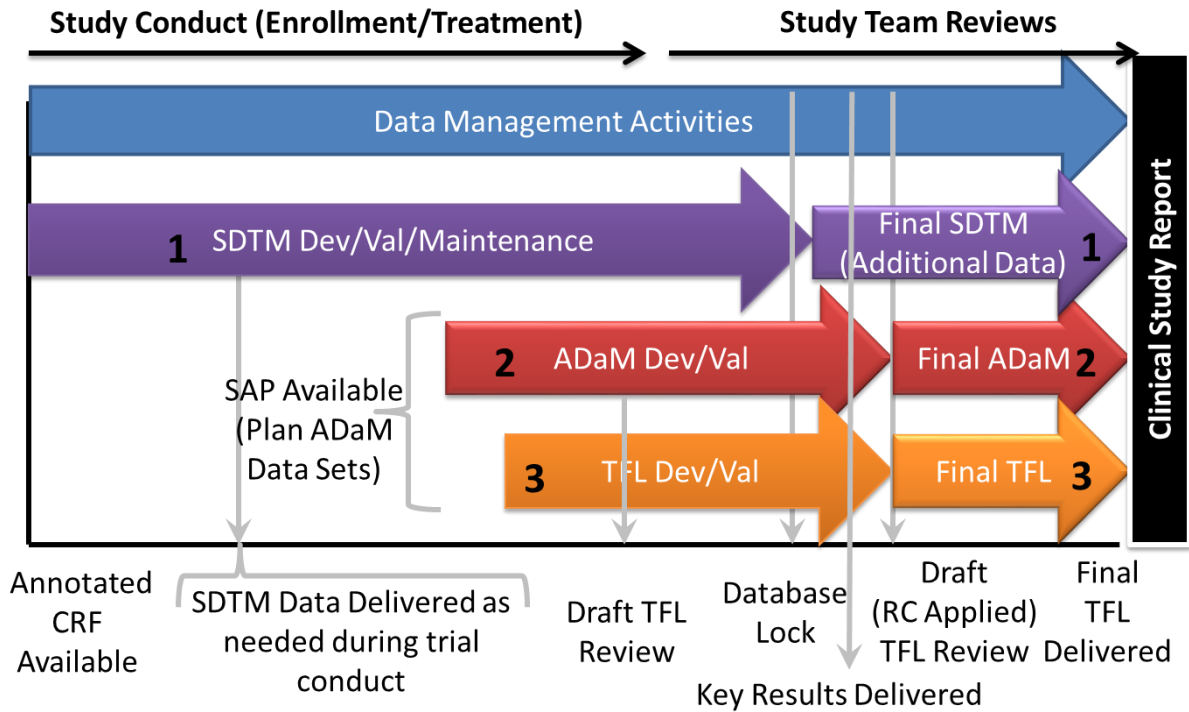

1007

1008 Where:

- 1009 1. Development, Validation, and Maintenance of SDTM domains
- 1010 2. Development and Validation of Analysis Data Sets (ADaM), with input source the
- 1011 appropriate SDTM domains.
- 1012 3. Development and Validation of draft and then final Tables, Figures, and Listings
- 1013 (TFL), with input data source the SDTM domains and analysis specific ADaM data
- 1014 sets and randomization code (RC) applied.

1015

1016 **7.3.10. Period #1 Data Management Study Data Cutoff**

1017 As detailed in the Data Management Plan v2.0, raw datasets will be separated by Data  
 1018 Management into data captured on CRFs up to Week 24, which will include Week 24 F/U  
 1019 data, and data captured on CRFs after Week 24. Only the “up to Week 24” datasets will be  
 1020 transferred to Summit Analytical for analysis in this SAP.

1021 Data from “up to Week 24 visit” events will be selected from *non-visit* eCRFs (informed  
 1022 consent, adverse events, concomitant medications, and concomitant non-drug treatment  
 1023 form) using the study event variable, including only visits labeled “up to Week 24”. The  
 1024 Unscheduled Visit and End of Study event (Discharge from Study CRF) data will be  
 1025 separated using the event date of the Unscheduled Visit and the Last Date of Study

1026 Participation, respectively, and the first date of dose tapering from the Study Drug Return  
1027 eCRF at the Week 28 visit for each participant during the transition period to Treatment  
1028 Period #2. For participants lost to follow up, screen failures, and participants lost to follow up  
1029 during Treatment Period #1, all data is included. The other event data will be separated using  
1030 the study event variable, including only visits up to and including Week 24.

## 1031 **7.4. General Statistical Methodology**

### 1032 **7.4.1. Statistical Summaries: Descriptive and Inferential**

1033 Unless otherwise specified, all statistical tests will be two-sided and a resultant p-value of  
1034 less than or equal to 0.05 will be considered statistically significant. See [Section 7.4.5](#) for  
1035 more details on the handling of multiple comparisons for the efficacy analyses. All p-values  
1036 will be rounded to and displayed in four decimals. If a p-value less than 0.0001 occurs, it will  
1037 be shown in tables as <0.0001.

1038 Descriptive summaries of variables will be provided where appropriate. In general, for  
1039 continuous variables, the number of non-missing values (n) and the mean, standard deviation,  
1040 median, minimum, and maximum will be tabulated. For categorical variables, the counts and  
1041 proportions of each value will be tabulated.

1042 All collected data will be presented in listings. Data not subject to analysis according to this  
1043 plan will not appear in any tables or graphs but will be included in the data listings.

### 1044 **7.4.2. Interim Analyses and Data Monitoring**

1045 No interim analyses are planned for this study.

1046 The independent Data and Safety Monitoring Board (DSMB) will be consulted to review  
1047 safety data. The DSMB will meet at regular intervals to review all pertinent safety data. The  
1048 DSMB may request summaries at other points in time. In addition, the Medical Monitor may  
1049 request at any time that the DSMB review safety data if the Medical Monitor has specific  
1050 concerns.

1051 In all cases, data will be compiled by the Coordinating Center and presented to the DSMB in  
1052 a format that allows for complete review of all compiled safety data. The DSMB can  
1053 recommend to the Sponsor altering or terminating the trial for safety or other study integrity-  
1054 related issues.

1055 The primary safety endpoints that the DSMB will review are safety labs and adverse events.  
1056 Refer to the DSMB charter for complete details. Analysis and reporting of safety endpoint  
1057 information is specified in the DSMB Charter, and not repeated herein. Note that all DSMB  
1058 reports will be included in the final CSR.

1059 **7.4.3. Week 24 Analysis**

1060 The primary analyses described in this SAP are the analyses which will be performed after  
1061 all subjects complete the Week 24 F/U Visit (or complete the Week 24 Visit for subjects who  
1062 were unable to complete the Week 24 F/U Visit) (end of Treatment Period #1). The results  
1063 from these analyses will be provided to regulatory authorities. Investigators, study subjects,  
1064 study staff, and monitors will remain blinded throughout the duration of the 52-week study.  
1065 The Sponsor, including data management and statistical personnel, will be unblinded after all  
1066 subjects have completed the Week 24 F/U Visit to provide analysis of Period #1.

1067 **7.4.4. Week 48 Analysis**

1068 The Week 48 analyses will be performed after all subjects complete Week 48 of Treatment  
1069 Period #2 and the subsequent 4-week double-blind Dose-tapering Period, if applicable, and  
1070 will be the subject of a second SAP. The results from these analyses will be provided to  
1071 regulatory authorities. All study staff may be unblinded after database lock of data from the  
1072 entire study.

1073 **7.4.5. Multiple Testing Procedures**

1074 The primary efficacy endpoint tests vamorolone 6.0 mg/kg/day dose group vs. placebo using  
1075 TTSTAND velocity at Week 24 and occurs during Treatment Period #1 of the study. The  
1076 primary efficacy endpoint supports the primary objective of this study. The study is thus  
1077 powered for the efficacy comparison as described in [Section 6](#) using an alpha level of 0.05  
1078 for success.

1079 The secondary efficacy endpoints will be tested at Week 24 along with the primary efficacy  
1080 endpoint using a fixed sequential testing process where the fixed sequence of testing will be  
1081 done in the following order:  
1082

- 1083
- 1084 1. TTSTAND velocity, vamorolone 2.0 mg/kg/day vs placebo
  - 1085 2. 6 Minute Walk Test (6MWT) meters walked, vamorolone 6.0 mg/kg/day vs. placebo
  - 1086 3. 6 Minute Walk Test (6MWT) meters walked, vamorolone 2.0 mg/kg/day vs. placebo
  - 1087 4. Time to Run/Walk (TTRW) 10 meters velocity, vamorolone 6.0 mg/kg/day vs.  
1088 placebo
  - 1089 5. Time to Run/Walk (TTRW) 10 meters velocity, vamorolone 2.0 mg/kg/day vs.  
1090 placebo
  - 1091 6. 6MWT meters walked, vamorolone 6.0 mg/kg/day vs. prednisone
  - 1092 7. 6MWT meters walked, vamorolone 2.0 mg/kg/day vs. prednisone
- 1093

1094 Each test in the sequence will be carried out using a two-sided alpha level of 0.05. Statistical  
1095 testing of the primary/secondary efficacy endpoints will stop if a p-value >0.05 occurs or if a  
1096 p-value ≤0.05 occurs in the wrong direction. In case the fixed sequential testing process  
1097 stops, the results of the subsequent tests will be reported with nominal p-values, but p-values



1098  $\leq 0.05$  in the right direction will not be considered proof of statistical testing success in these  
1099 subsequent tests.

1100

1101 All other analyses will not be corrected for multiple comparisons (tests will be performed at a  
1102 nominal alpha level of 0.05), as they will be viewed and handled in the perspective of not  
1103 testing a formal hypothesis.

1104

## 1105 **7.5. Summary of Study Data**

### 1106 **7.5.1. Subject Summary Grouping**

1107 In general, and unless otherwise noted, data summaries will be presented by treatment group.

### 1108 **7.5.2. Study Disposition**

1109 Subject counts will be summarized by analysis population.

1110

1111 The number of subjects enrolled (i.e., signed informed consent form), screened following  
1112 enrollment, randomized following screening, completing Week 24 and Week 24 F/U,  
1113 discontinuing early, and the reason for discontinuation from the study will be summarized.

1114

1115 The number of subjects randomized by country and site will be tabulated in a summary table  
1116 by analysis population.

1117

1118 A by-subject data listing of study completion information including the reason for premature  
1119 study withdrawal, if applicable, will be presented. In addition, the reasons for failing  
1120 screening will be listed. Also, the duration of treatment (time from first dose to last dose  
1121 during Period #1) will be presented in the listing.

1122

### 1123 **7.5.3. Protocol Deviations**

1124 All protocol deviations will be presented in a by-subject data listing. Deviations will be  
1125 presented by subject and site. Deviations incurred due to COVID-19 pandemic study  
1126 modifications will be noted. Important deviations will be classified.

1127 Protocol deviations will be summarized descriptively, categorically, by treatment group for  
1128 all analysis populations.

### 1129 **7.5.4. Demographics and Baseline Characteristics**

1130 Subject demographics (age, race, and ethnicity), baseline characteristics (height, height  
1131 percentile, weight, body mass index [BMI], BMI Z-score, and months since first DMD  
1132 symptoms noticed), and baseline efficacy data for TTSTAND in seconds, 6MWT, and  
1133 NSAA total score will be summarized descriptively, either continuously or categorically by  
1134 treatment group for all analysis populations.

1135 Subjects that indicate more than 1 race will be counted under “Multiple” in the race  
1136 tabulation.

1137 All demographic and baseline information, including DMD mutation type, will be presented  
1138 in by-subject listings (note that date of birth will be excluded from the listings).

#### 1139 **7.5.5. Medical History**

1140 Subject medical and surgical history will be collected during the screening period and  
1141 reviewed throughout the study. The dates and descriptions of past events will be documented  
1142 in source documents and captured in the relevant eCRF. Medical history will be coded using  
1143 MedDRA (version 20.0 or later). The number and percentage of subjects with any medical  
1144 history events will be summarized by system organ class and preferred term by treatment  
1145 group (and overall) for the Safety Population. At each level of tabulation subjects will be  
1146 counted once if they had 1 or more of each such event.

1147 Subject medical history data will be presented in a by-subject listing.

#### 1148 **7.5.6. Prior and Concomitant Medications**

1149 A categorical summary of prior and all concomitant medications and non-pharmacological  
1150 treatments taken prior to and during the course of the study will be presented in tabular form  
1151 summarizing the number and percentage of subjects by anatomical therapeutic chemical  
1152 classification level and preferred name by treatment group (and overall) using the World  
1153 Health Organization (WHO) Drug classification (Version 01 JUN 2017 or later) for the  
1154 Safety Population. At each level of tabulation subjects will be counted once if they had 1 or  
1155 more of instance of medication usage.

1156 A concomitant medication is defined as any medication taken on or after the day of first  
1157 exposure to study drug up until the Week 52 Visit. Concomitant medications taken on or  
1158 after the first exposure to study drug until the end of the Week 24 F/U Visit will be  
1159 summarized in the Period #1 analyses.

1160 Prior medications are defined as any medications that are taken prior to the day of first  
1161 exposure to study drug, collected from up to 3 months prior to Screening.

1162 Medications missing year from date information will be considered concomitant medications  
1163 unless other date information shows clearly that the medication was not concomitant.

1164 All prior medications, concomitant medications, and non-pharmacological treatments will be  
1165 presented in by-subject listings.

1166 **7.5.7. Treatment Compliance and Study Drug Exposure**

1167 Study drug administration and treatment compliance, and study drug exposure will be  
1168 summarized descriptively for suspension and tablets separately for the Safety Population and  
1169 the mITT Population.

1170  
1171 Suspension administration and compliance will be calculated based on the weight of  
1172 suspension in grams. For each subject, the total suspension administered will be estimated  
1173 from the total weight of the suspension bottles dispensed and returned (amount dispensed g –  
1174 amount returned g), as collected on the CRF. Further, the amount of suspension prescribed is  
1175 captured on the CRF in mL. This data will be used to calculate the total suspension  
1176 prescribed for each subject and converted to grams (1 mL suspension = 1 g suspension).  
1177 Compliance percentage will then be calculated as the total suspension administered g / total  
1178 suspension prescribed g x 100%. These endpoints will be summarized for all treatment  
1179 groups and overall.

1180  
1181 Tablet administration and compliance will be calculated based on the count of tablets  
1182 dispensed and returned, and the count of tablets prescribed. The count of tablets dispensed  
1183 and returned is captured on the CRF and will be used to calculate the total tablets  
1184 administered for each subject. Further, for each subject, the prescribed tablet dosing is  
1185 captured on the CRF in mg, which will be converted to a count of tablets (1 tablet = 5 mg).  
1186 Compliance percentage will then be calculated as the total tablets administered count / total  
1187 tablets prescribed count x 100%. These endpoints will be summarized for all treatment  
1188 groups and overall.

1189  
1190 For vamorolone, exposure will be presented only for the vamorolone treatment groups. For  
1191 the 6.0 mg/kg/day treatment group, vamorolone exposure will be calculated as the total  
1192 suspension administered g x 40 mg/g (there are 40 mg vamorolone per g of 6 mg  
1193 suspension). Similarly for the 2.0 mg/kg/day treatment group, vamorolone exposure will be  
1194 calculated as the total suspension administered g x 13.3 mg/g (there are 13.3 mg vamorolone  
1195 per g of 2 mg suspension).

1196  
1197 For prednisone, exposure will be presented only for the prednisone treatment group.  
1198 Prednisone exposure will be calculated as the total tablets administered x 5 mg.

1199  
1200 Treatment administration, compliance, and exposure data will be presented in by-subject  
1201 listings.

1202  
1203 **7.6. Efficacy Analyses**

1204 The evaluations of clinical efficacy will be performed using the mITT Population and Per  
1205 Protocol Population, unless otherwise noted. Analyses will be done as per randomized  
1206 treatment. Only data captured during Treatment Period #1 (Screening to Week 24) will be  
1207 analyzed in this SAP.

1208

1209 All efficacy data will be summarized descriptively for observed and change from baseline by  
1210 treatment group and visit, and will be presented in by-subject listings. Where considered  
1211 relevant, plots will be created.

1212

1213 The primary efficacy outcome, TTSTAND (velocity) change from baseline to Week 24, will  
1214 be compared between the 6.0 mg/kg/day vamorolone group and the placebo group using a  
1215 restricted maximum likelihood (REML)-based MMRM. This model includes fixed effects for  
1216 treatment (vamorolone 2.0 mg/kg/day, vamorolone 6.0 mg/kg/day, prednisone 0.75  
1217 mg/kg/day, and placebo), age group (<6 years; ≥6 years), week, baseline TTSTAND  
1218 velocity, and the treatment-by-week interaction. Study week will be included in the model as  
1219 a categorical variable (Weeks 6, 12, and 24) along with the treatment-by-week interaction.  
1220 Within this model, pairwise comparisons (using LS mean contrasts) will be made to compare  
1221 TTSTAND velocity at 24 weeks for vamorolone 6.0 mg/kg/day dose level with placebo  
1222 (primary efficacy outcome).

1223

1224 For secondary and exploratory efficacy outcomes, as detailed in Sections 4.2.3.2 and 4.2.3.3,  
1225 the same models will be used as for primary outcome (REML-based MMRM including fixed  
1226 effects for treatment [vamorolone 2.0 mg/kg/day, vamorolone 6.0 mg/kg/day, prednisone  
1227 0.75 mg/kg/day, and placebo], age group [<6 years; ≥6 years], week, response variable  
1228 baseline, and the treatment-by-week interaction).

1229

1230 Additional tests are done in exploratory analyses. See [Section 7.4.5](#) for more details on the  
1231 handling of multiple comparisons of secondary analyses.

1232

1233 An unstructured covariance matrix will be used, and underlying modelling assumptions will  
1234 be checked. If this analysis fails to converge, Akaike's information criterion will be used to  
1235 select the best covariance structure from compound symmetry and autoregressive-1 (AR(1)).  
1236 The Kenward-Roger approximation will be used to estimate denominator degrees of  
1237 freedom. If differences between baseline characteristics exist between the treatment groups,  
1238 it will be investigated if adjustment for these characteristics is clinically relevant and  
1239 necessary. The secondary outcome measures will be compared using similar models.

1240

1241 The following sensitivity analyses will be performed using the MMRM analysis described  
1242 above for the primary outcome (TTSTAND velocity vamorolone 6.0 mg/kg/day dose group  
1243 versus placebo and presented for Week 24), and the secondary outcomes, presented for Week  
1244 24, (TTSTAND velocity vamorolone 2.0 mg/kg/day vs placebo; 6MWT meters walked  
1245 vamorolone 6.0 mg/kg/day vs. placebo; 6MWT meters walked vamorolone 2.0 mg/kg/day  
1246 vs. placebo; TTRW 10 meters velocity vamorolone 6.0 mg/kg/day vs. placebo; TTRW 10  
1247 meters velocity vamorolone 2.0 mg/kg/day vs. placebo; 6MWT meters walked vamorolone  
1248 6.0 mg/kg/day vs. prednisone; and 6MWT meters walked vamorolone 2.0 mg/kg/day vs.  
1249 prednisone) (see [Section 7.3.2.2](#) for more details):

- 1250 • Multiple imputation using MCMC methods for missing data on TTSTAND velocity  
1251 and 6MWT, using the mITT population;  
1252 • Multiple imputation using MCMC methods for missing data on TTSTAND velocity  
1253 and 6MWT, using all subjects, including those with no baseline or post-baseline  
1254 assessment;  
1255 • Multiple imputation using MCMC methods for missing data on TTSTAND velocity  
1256 and 6MWT, using randomized subjects who have non-missing baseline data;  
1257 • No imputation on TTSTAND velocity and 6MWT, using randomized subjects with  
1258 no missing assessments;  
1259 • Multiple imputation using a Control-based Pattern-Mixture Model for missing data on  
1260 the primary and secondary efficacy endpoints, using the mITT population.

1261 The following COVID-19 sensitivity analyses will be performed using the MMRM analysis  
1262 described above for the primary outcome (TTSTAND velocity vamorolone 6.0 mg/kg/day  
1263 dose group versus placebo and presented for Week 24 using the mITT population) (see  
1264 [Section 7.3.2.3](#) for more details):

- 1265 • Impact of assessments that are missing or delayed due to COVID-19  
1266 • Impact of alternative assessment methods (motor assessment using video assessment  
1267 method)

1268 The following sensitivity analysis assessing the impact of the most influential TTSTAND  
1269 observations will be performed using the MMRM analysis described above for the primary  
1270 outcome TTSTAND velocity vamorolone 6.0 mg/kg/day dose group versus placebo and  
1271 presented for Week 24 using the mITT population: All TTSTAND values that are <2.5  
1272 seconds (0.4 rises per second) will be imputed as 2.5 seconds. After this imputation, the data  
1273 will be analyzed similarly as for the primary analysis. The rationale of this sensitivity  
1274 analysis is provided below.

- 1275 • The time to rise testing protocol caps the time allowed to rise at 30 seconds (0.033  
1276 rises per second). The velocity transformation diminishes the impact of large  
1277 fluctuations in timed performance at the more impaired end of the spectrum. When a  
1278 patient cannot perform the test anymore, a standardized value is assigned  
1279 (velocity=0). In this case, e.g. a 45 second actual performance is imputed as unable  
1280 to perform the test (velocity=0).  
1281 • A challenge of the velocity transformation in the less impaired spectrum of DMD is  
1282 that variability in reaction time of the subject or the variability in initiating the  
1283 stopwatch by the clinical evaluator (typically about 0.5 seconds) can impact the  
1284 velocity substantially even though a small change in time to rise at the less impaired  
1285 end of the scale is not clinically meaningful in terms of disease progression or  
1286 improvement. For example, a deterioration from 2.0 seconds to 2.5 seconds in rise  
1287 time would translate to a deterioration of 0.1 rises per second in velocity which is  
1288 twice the pre-specified effect size of this study.  
1289 • The lower limit of normal for time to rise from the floor for 4 to 6 year old or older  
1290 healthy typically developing patients (defined as 5th percentile or better) from a  
1291 natural history cohort from Belgium (Hoskens, et al. 2019) was found to be 2.5

1292 seconds. Therefore, incremental small changes in rise times below 2.5 seconds would  
1293 be deemed to be not clinically meaningful and are observed in virtually all healthy  
1294 typically developing children with normal phenotype. There is likelihood that the  
1295 signal to noise ratio below 2.5 seconds would be suboptimal as large changes in  
1296 velocity would be calculated with small changes in absolute times.

- 1297 • Therefore, to mitigate the effect of reaction time on the calculated velocity at the less  
1298 impaired end of the scale and to diminish the likelihood that a 0.2 to 0.5 second  
1299 change in rise from floor time occurring in the normal range of functioning would  
1300 result in a large change in velocity, a sensitivity analysis will be performed that  
1301 transforms all values below 2.5 seconds to a value of 2.5 seconds. For example, a 0.5  
1302 second change in the normal end of the spectrum from 2.5 to 2.0 seconds or from 2 to  
1303 2.5 seconds, which would result in a calculated change in velocity of 0.1 rises per  
1304 second will be treated as a change of 0 (2.5 seconds on both measures), for the  
1305 purposes of this sensitivity analysis.

1306

1307 The following sensitivity analysis due to missing 6MWT data, which pools other motor  
1308 function tests, will be presented:

- 1309 • As reported by McDonald et al. (2013), the motor function tests TTSTAND, TTRW,  
1310 TTCLIMB, and 6MWT are correlated in patients with DMD as they all measure  
1311 timed motor function. In order to evaluate the impact of vamorolone treatment on  
1312 timed motor function using as complete dataset as possible, an additional sensitivity  
1313 analysis will be conducted by pooling the data from all the motor function tests  
1314 except TTSTAND (i.e., TTRW velocity, TTCLIMB velocity, and 6MWT). The  
1315 rationale for this sensitivity analysis is to use as much data as possible to estimate the  
1316 impact of missing data. Due to the correlation both between the parameters and  
1317 within the repeated longitudinal assessments, this analysis is expected to provide  
1318 further information on the consistency of the effects. The concept of pooling data  
1319 from multiple motor function endpoints in DMD has been introduced by Li et al.  
1320 (2020). The analysis defined below uses similar concept of pooling data from the  
1321 timed tests used in DMD, using these data in a sensitivity analysis based on a  
1322 multivariate repeated measures model.
  - 1323 ○ First, the test data will be standardized by using the percentage change from  
1324 baseline as the endpoint. The percentage change will be calculated as  $(\text{value at visit} - \text{baseline value}) / \text{baseline value} \times 100\%$ , calculated from the endpoints  
1325 as used in the original statistical analysis, i.e. from velocities or distances. All  
1326 the percentual change values from the three tests, TTRW, TTCLIMB, and  
1327 6MWT, will be entered to a single statistical model.
  - 1328 ○ A model similar to the MMRM model presented in this SAP will be used, but  
1329 in addition to the fixed factors included in the MMRM detailed above, the  
1330 parameter (TTRW velocity, TTCLIMB velocity, or 6MWT) and all 2- and 3-  
1331 level interaction terms between treatment group, visit and parameter will be  
1332 added. The model will use the Kronecker product covariance structure, as  
1333 proposed by Galecki (1994). Accordingly, the covariance structure will be set  
1334

1335 as type=un@ar(1) in the REPEATED statement of the MIXED procedure.  
1336 The SAS code for implementing this kind of model with the MIXED  
1337 procedure is provided by Gao et al. (2006) and outlined below.

```
1338 proc mixed;  
1339 class usubjid age paramcd trtp avisit;  
1340 model chg=age paramcd trtp avisit paramcd*trtp paramcd*avisit trtp*avisit  
1341 paramcd*trtp*avisit / ddfm=kr;  
1342 repeated paramcd avisit / subject=usubjid type=un@ar(1);  
1343 run;
```

1344  
1345 As support for the primary and secondary efficacy endpoint analyses, the pattern and type of  
1346 missing data will be summarized for the primary and secondary efficacy endpoints by visit.  
1347 For each visit, the data will be classified as available, or missing. The missing data will be  
1348 further classified as intermittent (missing value is followed by an observed value) or as  
1349 measurement dropouts (all subsequent values after the missing value are missing). The  
1350 intermittent missing data will be further classified as missing due to COVID-19 or due to  
1351 other reasons. The measurement dropouts will be further classified as inability of the subject  
1352 to perform the test due to disease-related disability, due to COVID-19, or due to other  
1353 reasons.

1354  
1355 Furthermore, a supportive responder analysis of the TTSTAND velocity primary and  
1356 secondary efficacy endpoints (comparison of vamorolone 6.0 mg/kg/day dose group versus  
1357 the placebo group and 2.0 mg/kg/day dose group versus the placebo group at Week 24  
1358 assessment) will be conducted by classifying the endpoint data as improvements (better  
1359 velocity compared to baseline) versus non-improvements (same or worse velocity compared  
1360 to baseline). The responder endpoints will be tabulated at Week 24 by treatment group, and  
1361 the percentage of responders will be compared between vamorolone 6.0 mg/kg/day dose  
1362 group versus placebo group and 2.0 mg/kg/day dose group versus placebo group using  
1363 descriptive statistics and Fisher's exact test. This analysis will be performed on the mITT  
1364 population. Further, this analysis will be done 2 ways, first on observed cases only, and then  
1365 again assuming subjects with a missing Week 24 assessment will be considered non-  
1366 improvers.

1367  
1368 In addition to the summary tables described above, TTSTAND velocity at Week 24 will be  
1369 presented in 3 summary tables of continuous descriptive statistics on observed response and  
1370 change from baseline by treatment group and time point using the mITT population by 3  
1371 subgroups: baseline age  $\leq 5.0$  years vs.  $> 5.0$  years; baseline age  $\leq 6.0$  years vs.  $> 6.0$  years;  
1372 and TTSTAND seconds at baseline  $\leq 5.0$  seconds vs.  $> 5.0$  seconds.

1373  
1374 TTSTAND in seconds will be presented in a summary table of continuous descriptive  
1375 statistics on observed response and change from baseline by treatment group and time point  
1376 using the mITT population.  
1377

1378 TTSTAND in seconds will be presented in a shift table for Week 24 shift from baseline for  
1379 categories of <5 seconds, 5 to 10 seconds, and >10 seconds. Subject counts and percentages  
1380 will be tabulated by treatment group for the mITT population. Percentages will be based on  
1381 the number of subjects with a baseline and Week 24 assessment.

1382  
1383 Additional supportive analyses for the primary efficacy endpoint may be performed. They  
1384 include excluding subjects with large differences between the screening and baseline value  
1385 TTSTAND velocity scores (larger than 2 standard deviations) and excluding subjects who  
1386 had their TTSTAND times measured at a visit using live video remote streaming, instead of  
1387 recorded and times measured from the live recording.

1388  
1389

## **7.7. Safety Analyses**

1390 Safety analyses will be performed using the Safety Population and will be completed using  
1391 the actual treatment a subject received. All safety data will be presented in by-subject listings  
1392 as well as in tables and figures as described below. In general, descriptive statistics for each  
1393 safety endpoint will be presented by time point and treatment group. Where considered  
1394 relevant, plots will be created.

1395  
1396

Safety data from Treatment Period #1 will be summarized together by treatment group.

1397

### **7.7.1. Adverse Events**

1398 Adverse events will be coded using the Medical Dictionary for Regulatory Activities  
1399 (MedDRA), version 20.0.

1400

1401 TEAEs are defined as any adverse event or worsening of an existing condition after initiation  
1402 of the investigational product and through the subject's last study visit (study completion or  
1403 early termination). AEs with missing year from the start date will be considered treatment-  
1404 emergent unless it is clear from non-missing date information that the AE started prior to first  
1405 dose of study drug. For the Period #1 analyses described herein, AEs and TEAEs which  
1406 occur through the subject's Week 24 F/U Visit are included. Serious AEs will be recorded  
1407 from the date of informed consent, throughout the clinical trial, and for up to 30 days after  
1408 the final administration of study drug, with the cut-off for the Period #1 analyses at the  
1409 Week 24 F/U Visit (or Week 24 Visit for subjects who did not have a Week 24 F/U Visit). If  
1410 the onset of an AE is on Day 1 and its relationship to time of study drug administration is  
1411 unknown, then the AE will be counted as treatment-emergent. If the onset of the AE is on  
1412 Day 1 but is known to have onset prior to the time of the first administration of study drug,  
1413 the AE will not be considered treatment emergent.

1414

1415 The number and percent of subjects with any TEAEs will be summarized by system organ  
1416 class and preferred term by treatment group (and overall). At each level of tabulation (e.g., at  
1417 the preferred term level) subjects will be counted only once if they had more than one such  
1418 event reported during the AE collection period. (Note that the ADaM ADAE dataset will



1419 include the coded terms for SOC, PT, Highest Level Term, Highest Level Group Term, and  
1420 Lowest Level Term.)

1421

1422 Level of intensity will be assessed using the CTCAE grading (CTCAE v 4.03 grade).

1423 The following summary tables and subject level listings will be presented for TEAE data:

1424 • Overall summary of TEAEs

1425 • Summary table of incidence of TEAEs by descending incidence by PT

1426 • Summary table of incidence of TEAEs by SOC and PT (will include counts of  
1427 subjects and events)

1428 • Summary table of incidence of serious TEAEs by SOC and PT (will include counts of  
1429 subjects and events)

1430 • Summary table of incidence of TEAEs by maximum relatedness to treatment by SOC  
1431 and PT

1432 • Summary table of incidence of TEAEs by maximum intensity by SOC and PT

1433 • Summary table of incidence of TEAEs leading to study drug discontinuation by SOC  
1434 and PT

1435 • Summary table of incidence of TEAEs by worst outcome (recovered/resolved vs.  
1436 recovering/resolving vs. not recovered/not resolved vs. recovered/resolved with  
1437 sequelae vs. fatal vs. unknown) by SOC and PT

1438 • Table listing of SAEs

1439 • Table listing of related SAEs

1440 • Table listing of all AEs leading to death

1441 • Table listing of all AEs leading to study discontinuation

1442 A listing will present all AEs associated with suicidality (Maund et al., 2014), where adverse  
1443 event listing preferred term and verbatim term data will be searched and reported for terms:

1444 • “suic”, “overdos”, “attempt”, “cut”, “gas”, “hang”, “hung”, “jump”, “mutilate”,  
1445 “overdos”, “self damage”, “self harm”, “self inflict”, “self injur”, “shoot”, and “slash”

1446 • “poi”, “emot”, “labi”, “hos”, “vio”, “agg”, “thought”, and “think”.  
1447

1448 A listing will present all AEs associated with abuse potential (Bossard et al., 2016), where  
1449 adverse event listing preferred term and verbatim term data will be searched and reported for  
1450 terms:

1451 • “drug”, “chemical”, “abuse”, “dependence”, “disuse”, “diversion”, “withdrawal”,  
1452 “mood”, “substance”, “unapproved”, “polysubstance”, “euphoric”, “addict”,  
1453 “dysthymic”

1454 Obvious false positives (e.g., “gas” in “gastrointestinal”, “cut” in “acute,” and “vio” in  
1455 “behavior”) will be excluded as per FDA (Posner et al., 2007).

### 1456 **7.7.2. Vital Signs, 12-Lead ECG, and Laboratory Outcomes**

1457 Vital signs, including height and height percentile, weight, and BMI and BMI Z-score,  
1458 clinical laboratory test results, and other laboratory test results not detailed elsewhere in this  
1459 SAP will be summarized at each assessment time point by treatment group using descriptive  
1460 statistics and presented for observed response as well as change from baseline. Descriptive  
1461 statistics will include the typical statistics for continuous endpoints described in this SAP as  
1462 well as interquartile range.

1463  
1464 Height percentile change from baseline and BMI Z-score change from baseline results will  
1465 be compared between treatment groups using an REML-based MMRM analysis with  
1466 treatment group, week of the visit, and the treatment-by-week interaction as factors, and  
1467 baseline response (height percentile or BMI Z-score) and age group as a covariate. Week will  
1468 be included in the model as a categorical variable (Week 12 and 24) along with the  
1469 treatment-by-week interaction. An unstructured within-subject covariance matrix will be  
1470 used. If this analysis fails to converge, Akaike's information criterion will be used to select  
1471 the best covariance structure from compound symmetry and autoregressive-1 (AR(1)). The  
1472 Kenward-Roger approximation will be used to estimate denominator degrees of freedom.

1473  
1474 Overall ECG interpretation will be summarized categorically by assessment response and via  
1475 shift table presenting Normal/Abnormal Not Clinically Significant/Abnormal Clinically  
1476 Significant and will also be presented in by-subject listings.

1477  
1478 Clinical laboratory summary tables for continuous descriptive statistics will include only  
1479 central lab data. Change from baseline in all continuous clinical laboratory test results will be  
1480 tested using one sample t-tests with p-values presented along with the descriptive statistics at  
1481 each assessment visit within each treatment group (note that pharmacodynamic biomarkers-  
1482 creatine kinase [CK] for efficacy, fasting glucose and insulin for insulin resistance, and  
1483 glutamate dehydrogenase [GLDH] for safety- will be of special interest).

1484 Clinical laboratory test results will also be presented in shift tables for all laboratory  
1485 parameters where low/normal/high or normal/abnormal status can be ascertained. These shift  
1486 tables will include central and local lab data. Abnormal clinical lab test results will be  
1487 presented in a table listing where low/normal/high or abnormal/normal status can be  
1488 ascertained.

1489  
1490  
1491 Low/normal/high or normal/abnormal flags will be imputed on local lab data only if the  
1492 normal flag is missing and a lower and/or upper normal range are provided in the raw data  
1493 for the observation so that the lab response can be assessed as low/normal/high or  
1494 normal/abnormal depending on the normal range data provided. Note that this same  
1495 imputation will also be carried out on vitamin D data from the central lab when possible.

1496  
1497 For by-subject listings, clinically significant response (yes/no) will be presented as collected  
1498 for local labs.

1499

1500 Lab results that are below the lower limit of quantification will be divided by 2 for analysis  
1501 (ex., a lab response of “<0.1” will be analyzed as 0.05). Lab results that are above the upper  
1502 level of quantification will be analyzed using the upper level of quantification (ex., a lab  
1503 response of “>1500” will be analyzed as 1500).

1504

1505 Central lab results will be presented using both U.S. conventional units and SI units. Local  
1506 lab results will be presented using the units as collected.

1507

1508 Except for lab results and follow-up eye and ECG examinations, data gathered at  
1509 unscheduled visits will not be summarized but will be included in by-subject data listings.  
1510 See [Section 7.3.1](#) for unscheduled or repeated lab tests.

1511

### 1512 **7.7.3. Physical Examination**

1513 Physical examination results will be presented in by-subject listings.

### 1514 **7.7.4. Other Safety Measures**

1515 Cushingoid features will be summarized by presenting the number and percentage of subjects  
1516 by treatment group that develop them as adverse events.

1517

1518 2D-echocardiogram results will be summarized by treatment group at Baseline and Week 24.  
1519 The number and percent of subjects who have normal, abnormal not clinically significant, or  
1520 abnormal clinically significant findings will be summarized by treatment group using shift  
1521 tables.

1522

1523 Eye examination results will be summarized at Baseline and Week 24. The number and  
1524 percent of subjects who have a cataract present (yes/no) will be summarized by treatment  
1525 group for left eye and right eye separately. The same summary will be performed for the  
1526 presence of glaucoma (yes/no), though not broken out by left and right eye. Intraocular  
1527 pressure readings will be presented in by-subject listings. Note that the window for the Week  
1528 24 eye exam data to be included in summary tables is the Week 24 scheduled visit date +-6  
1529 weeks.

1530

1531 ACTH Stimulation Test results will be summarized by treatment group at Baseline and Week  
1532 24 Follow-up. The peak cortisol measurement from the 30-minute and 60-minute tests will  
1533 be used in the analysis. The number and percent of subjects who have peak cortisol levels  
1534 <18 µg/dL (<500 nM) or ≥ 18 µg/dL (≥ 500 nM) will be summarized by treatment group.  
1535 Pearson Chi-square or Fisher’s exact tests will be used to compare each vamorolone dose  
1536 with prednisone, and the two vamorolone doses with each other. Note that the analysis  
1537 windows for the 30-minute and 60-minute tests are 30 minutes +-15 minutes and 60 minutes  
1538 +-15 minutes, respectively. Assessments outside these windows will not be included in the  
1539 analyses.

1540  
1541 DXA scan data will be summarized by treatment group at Baseline and Week 24. Descriptive  
1542 continuous statistics will be presented for observed response, change from baseline, and  
1543 percent change from baseline. Further, each vamorolone dose group will be compared with  
1544 prednisone on the percent change from baseline utilizing LS means from an ANCOVA  
1545 model with treatment group (all treatment groups included) as a main effect and age group at  
1546 study entry and baseline result as covariates.

1547  
1548 Fracture questionnaire results will be presented in by-subject listings.  
1549

## 1550 **7.8. Exploratory Analyses**

1551 Patient Reported Outcomes including the TSQM, PARS III, and Ease of Study Medication  
1552 Administration Assessment will be listed and presented using descriptive statistics by  
1553 treatment and time point using the Safety Population. PODCI data will be presented similarly  
1554 using the mITT Population. The Blindedness Assessment will be listed and presented using  
1555 descriptive statistics by treatment at Week 24 using the Safety Population.

1556  
1557 Each vamorolone dose group will be compared with prednisone on TSQM response at Week  
1558 24 utilizing LS means from an ANCOVA model with treatment group (all treatment groups  
1559 included) as a main effect and age group at study entry as a covariate.

1560  
1561 Each vamorolone dose group will be compared with prednisone and placebo on the change  
1562 from baseline in PARS III utilizing a REML-based MMRM with treatment group (all  
1563 treatment groups included), week of the visit, and the treatment-by-week interaction as  
1564 factors, and age group at study entry and baseline result as covariates for PARS III subscores  
1565 for peer relations, dependency, anxiety and depression, and withdrawal.

1566  
1567 Physical functioning will be assessed by completion of the PODCI. Two subscales (Upper  
1568 Extremity and Physical Function, and Transfers and Basic Mobility) will be summarized  
1569 descriptively as a continuous endpoint by treatment group at each time point collected.  
1570 Observed scores and change from baseline will be presented. Standardized scores will be  
1571 used for the analyses. All PODCI data will be presented in a by-subject listing. Each  
1572 vamorolone dose group will be compared with placebo on the change from baseline utilizing  
1573 an ANCOVA model with treatment group (all treatment groups included) as a main effect  
1574 and age group at study entry and baseline result as covariates.

## 1575 **7.9. Pharmacodynamic (PD) Serum and Other Biomarkers**

1577 The evaluations of PD will be performed using the Safety Population. Analyses will be done  
1578 as per actually received treatment.

1579  
1580 Serum PD biomarkers of adrenal axis suppression, insulin resistance, and bone turnover will  
1581 be assessed at Baseline, Week 12, and Week 24. Additional exploratory PD biomarkers of

1582 both safety and efficacy may be assessed. Vamorolone-treated groups will be compared to  
1583 both prednisone-treated and placebo groups.

1584  
1585 The descriptive summaries will include continuous descriptive statistics on observed and  
1586 change from baseline at each week by treatment group. Continuous descriptive statistics will  
1587 be provided along with interquartile range. One sample t-tests will be provided to test if the  
1588 change from baseline mean values are different from zero within each treatment group.

1589  
1590 PD biomarker change from baseline results will be compared between treatment groups using  
1591 REML-based MMRM analyses with treatment group, week of the visit, and the treatment-by-  
1592 week interaction as factors, and age group at study entry and baseline result as a covariate.  
1593 Week will be included in the model as a categorical variable (Week 12 and 24) along with  
1594 the treatment-by-week interaction. An unstructured within-subject covariance matrix will be  
1595 used. If this analysis fails to converge, Akaike's information criterion will be used to select  
1596 the best covariance structure from compound symmetry and autoregressive-1 (AR(1)). The  
1597 Kenward-Roger approximation will be used to estimate denominator degrees of freedom.  
1598 (Note that HbA1c is collected only once following baseline. It will be analyzed using an  
1599 ANCOVA model in a similar manner as described here for the MMRM analyses. The  
1600 ANCOVA model will include treatment group as a main effect, and age group at study entry  
1601 and baseline result as covariates.)

1602  
1603 For first-in-morning serum cortisol levels, along with the statistics described above, the  
1604 number and percent of subjects who have cortisol levels  $<3.6 \mu\text{g/dL}$  ( $<100 \text{ nM}$ ) or  $\geq 3.6$   
1605  $\mu\text{g/dL}$  ( $\geq 100 \text{ nM}$ ) will be summarized by treatment group. Pearson Chi-square or Fisher's  
1606 exact tests will be used to compare each vamorolone dose with prednisone, and the two  
1607 vamorolone doses with each other, similarly to how ACTH simulated cortisol levels are to be  
1608 tested.

1609  
1610 All PD biomarker data will be presented in by-subject listings. The listings will include  
1611 normal range data, where available. Furthermore, a listing of out of range observations will  
1612 be presented.

1613  
1614

1615 **8. REPORTING CONVENTIONS**

1616 The following reporting conventions will be adopted for the presentation of study data. These  
1617 conventions will enhance the review process and help to standardize presentation with  
1618 common notations

1619 **8.1. General Reporting Conventions**

- 1620 • All tables and data listings will be developed in Landscape Orientation, unless  
1621 presented as part of the text in a CSR.
- 1622 • Figures will be presented in Landscape Orientation, unless presented as part of  
1623 the text in a CSR.
- 1624 • Legends will be used for all figures with more than one variable or item  
1625 displayed.
- 1626 • Figures will be in presented in color with treatment groups distinguished by  
1627 different symbols and colors. Lines in figures should be wide enough to view  
1628 the line after being photocopied.
- 1629 • Specialized text styles, such as bolding, italics, borders, shading, superscripted  
1630 and subscripted text will not be used in tables, figures, and data listings unless  
1631 they add significant value to the table, figure, or data listing.
- 1632 • Only standard keyboard characters should be used in tables and data listings.  
1633 Special characters, such as non-printable control characters, printer specific,  
1634 or font specific characters, will not be used on a table, figure, or data listing.  
1635 Hexadecimal character representations are allowed (e.g., $\mu$ , $\alpha$ , $\beta$ ).
- 1636 • All titles will be centered on a page. The ICH numbering convention is to be  
1637 used for all tables, figures, and data listings.
- 1638 • All footnotes will be left justified and the bottom of a page. Footnotes must be  
1639 present on the page where they are first referenced. Footnotes should be used  
1640 sparingly and must add value to the table, figure, or data listing. If more than  
1641 four footnote lines are planned, then a cover page may be used to display  
1642 footnotes.
- 1643 • Missing values for both numeric and character variables will be presented as  
1644 blanks in a table or data listing. A zero (0) may be used if appropriate to  
1645 identify when the frequency of a variable is not observed.
- 1646 • All date values will be presented as YYYY-MM-DD (e.g., 2013-05-17) ISO  
1647 8601 format.
- 1648 • All observed time values will be presented using a 24-hour clock HH:MM:SS  
1649 format (e.g., 01:35:45 or 11:26). Seconds should only be reported if they were

- 1650 measured as part of the study, also in ISO 8601 format.
- 1651 • Time durations will be reported in mixed HHh MMm SSs notation (e.g., 5h  
1652 32m, or 27h 52m 31s). The use of decimal notation to present (display) time  
1653 durations should be avoided (e.g. 0.083h = 5m) unless it is necessary to show  
1654 the computation of time differences in a table, figure, or data listing, in which  
1655 case both notations may be used to display the time duration.
  - 1656 • All tables, figures, and data listings will have the Table, Listing, or Graph  
1657 status (DRAFT, FINAL), and a date/time stamp on the bottom of each output.
  - 1658 • All analysis programs developed for a table, figure, or data listing display will  
1659 be self-contained to facilitate transfer of programs to multiple computing  
1660 environments and transfer to a regulatory agency (if requested).

1661 **8.2. Population Summary Conventions**

- 1662 • Population(s) represented on the tables or data listings will be clearly  
1663 identified in the last title of the Table as “Population: <name of population>”  
1664 and will be identical in name to that identified in the protocol or SAP.
- 1665 • Consistent terminology will be used to define and identify a population.
- 1666 • Sub-population(s) or special population(s) descriptions will provide sufficient  
1667 detail to ensure comprehension of the population (e.g., FAS Females, Per-  
1668 Protocol Males >60 years of age) used for analysis in a table or figure.
- 1669 • Population sizes may be presented for each treatment or dosing category as  
1670 totals in the column header as (N=xxxx), where appropriate.
- 1671 • Population sizes shown with summary statistics are the samples sizes (n) of  
1672 subjects with non-missing values.
- 1673 • All population summaries for categorical variables will include all categories  
1674 that were planned and for which the subjects may have had a response.  
1675 Percentages corresponding to null categories (cells) will be suppressed.
- 1676 • All population summaries for continuous variables will include: N, mean, SD,  
1677 median, minimum, and maximum. Other summaries (e.g. number missing,  
1678 quartiles, 5%, 95% intervals, coefficient of variation [CV] or %CV) may be  
1679 used as appropriate.
- 1680 • All percentages are rounded and reported to xx.x%. A percentage of 100%  
1681 will be reported as 100%. For categorical summaries presenting “n (%)”, a  
1682 count of 0 will be presented as “0”. For continuous results an estimated % of 0  
1683 will be presented as “0%”.
- 1684 • Population summaries that include p-values will report the p-value to  
1685 four decimal places with a leading zero (0.0001). All p-values reported on  
1686 default output from statistical software (ie., SAS<sup>®</sup> Software version 9.4 or

1687 later) may be reported at the default level of precision. P-values <0.0001  
1688 should be reported as <0.0001 not 0.0000.  
1689



1690 **9. REFERENCES**

- 1691 Bello L, Kesari A, Gordish-Dressman H, et al. Genetic modifiers of ambulation in the  
1692 Cooperative International Neuromuscular Research Group Duchenne natural history study.  
1693 *Ann Neurol.* 2015; 77(4):684-696.  
1694
- 1695 Bossard JB, Ponté C, Dupouy J, Lapeyre-Mestre M, Jouanjus E. Disproportionality Analysis  
1696 for the Assessment of Abuse and Dependence Potential of Pregabalin in the French  
1697 Pharmacovigilance Database. *Clin Drug Investig.* 2016;36(9):735 - 742.  
1698
- 1699 Escolar DM, Hache LP, Clemens PR, et al. Randomized, blinded trial of weekend vs. daily  
1700 prednisone in Duchenne muscular dystrophy. *Neurology.* 2011; 77(5):444-452.  
1701
- 1702 Galecki AT. General class of covariance structures for two or more repeated factors in  
1703 longitudinal data analysis. *Communications in Statistics - Theory and Methods*, 23:11, 3105-  
1704 3119 (1994).  
1705
- 1706 Henricson EK, Abresch RT, Cnaan A, et al. The Cooperative International Neuromuscular  
1707 Research Group Duchenne natural history study: glucocorticoid treatment preserves  
1708 clinically meaningful function milestones and reduces rate of disease progression as  
1709 measured by manual muscle testing and other commonly used clinical trial outcome  
1710 measures. *Muscle Nerve.* 2013; 48(1):55-67.  
1711
- 1712 ICH E9 Expert Working Group. Statistical Principles for Clinical Trials: ICH Harmonized  
1713 Tripartite Guideline, September 1998.  
1714
- 1715 Li D, McDonald CM, Elfring GL, Souza M, McIntosh J, Kim DH, Wei LJ. Assessment of  
1716 Treatment Effect With Multiple Outcomes in 2 Clinical Trials of Patients With Duchenne  
1717 Muscular Dystrophy. *JAMA Netw Open.* 2020 Feb 5;3(2).  
1718
- 1719 Maund E, Tendal B, Hróbjartsson A, Lundh A, Gøtzsche PC. Coding of adverse events of  
1720 suicidality in clinical study reports of duloxetine for the treatment of major depressive  
1721 disorder: descriptive study. *BMJ.* 2014;348:g3555.  
1722
- 1723 McDonald CM, Henricson EK, Abresch RT, Duong T, Joyce NC, Hu F, Clemens PR,  
1724 Hoffman EP, Cnaan A, Gordish-Dressman H; CINRG Investigators. Long-term effects of  
1725 glucocorticoids on function, quality of life, and survival in patients with Duchenne muscular  
1726 dystrophy: a prospective cohort study. *Lancet.* 2018 Feb 3;391(10119):451-461. doi:  
1727 10.1016/S0140-6736(17)32160-8.  
1728
- 1729 McDonald CM, Henricson EK, Abresch RT, et al. The Cooperative International  
1730 Neuromuscular Research Group Duchenne natural history study – a longitudinal

1731 investigation in the era of glucocorticoid therapy: design of protocol and the methods used.  
1732 Muscle Nerve. 2013; 48(1):32-54.  
1733  
1734 Meyer RD, Ratitch B, Wolbers M, Marchenko O, Quan H, Li D, Fletcher C, Li X, Wright D,  
1735 Shentu Y, Englert S, Shen W, Dey J, Liu T, Zhou M, Bohidar N, Zhao PL & Hale M.  
1736 Statistical Issues and Recommendations for Clinical Trials Conducted During the COVID-19  
1737 Pandemic, Statistics in Biopharmaceutical Research, 2020; 12 (4): 399-411. DOI:  
1738 10.1080/19466315.2020.1779122.  
1739  
1740 Posner K, Oquendo MA, Gould M, Stanley B, Davies M. Columbia Classification Algorithm  
1741 of Suicide Assessment (C-CASA): classification of suicidal events in the FDA's pediatric  
1742 suicidal risk analysis of antidepressants. Am J Psychiatry. 2007 Jul;164(7):1035-43. doi:  
1743 10.1176/ajp.2007.164.7.1035. PMID: 17606655; PMCID: PMC3804920.  
1744  
1745 Ratitch B, O'Kelly M. Imputation of Pattern-Mixture Models Using Standard SAS/STAT  
1746 Procedures, PharmaSUG 2011 - Paper SP04.  
1747  
1748 Smith EC, Conklin LS, Hoffman EP, Clemens PR, Mah JK, Finkel RS, Guglieri M, Tulinius  
1749 M, Nevo Y, Ryan MM, Webster R, Castro D, Kuntz NL, Kerchner L, Morgenroth LP,  
1750 Arrieta A, Shimony M, Jaros M, Shale P, Gordish-Dressman H, Hagerty L, Dang UJ,  
1751 Damsker JM, Schwartz BD, Mengle-Gaw LJ, McDonald CM; CINRG VBP15 and DNHS  
1752 Investigators. Efficacy and safety of vamorolone in Duchenne muscular dystrophy: An 18-  
1753 month interim analysis of a non-randomized open-label extension study. PLoS Med. 2020  
1754 Sep 21;17(9):e1003222. doi:10.1371/journal.pmed.1003222. PMID: 32956407; PMCID:  
1755 PMC7505441.  
1756  
1757 Spurney C, Shimizu R, Morgenroth LP, et al. Cooperative International Neuromuscular  
1758 Research Group Duchenne Natural History Study demonstrates insufficient diagnosis and  
1759 treatment of cardiomyopathy in Duchenne muscular dystrophy. Muscle Nerve. 2014; Aug;  
1760 50(2):250-256.  
1761  
1762 Stein R, Jessop D. Manual for Personal Adjustment and Role Skills Scale, Albert Einstein  
1763 College of Medicine of Yeshiva University. 1990.  
1764  
1765

1766 **10. APPENDICES**

1767 **10.1. List of Tables, Listings, and Figures**

1768 A table of contents (TOC) of all SAP tables, listings, and figures will be provided in an  
 1769 external programming shell document.

1770 **10.2. SAP Amendment Summary of Important Changes**

| <b>SAP Version</b> | <b>Section</b>                                              | <b>Description of Change</b>                                                                                                                                                                                                                                                                                                                                                                                                                          |
|--------------------|-------------------------------------------------------------|-------------------------------------------------------------------------------------------------------------------------------------------------------------------------------------------------------------------------------------------------------------------------------------------------------------------------------------------------------------------------------------------------------------------------------------------------------|
| Final v2.0         | 7.7.1 Adverse Events                                        | The following clarification was added to the description of listings for AEs associated with suicidality and abuse potential:<br><br>Obvious false positives (e.g., “gas” in “gastrointestinal,” “cut” in “acute,” and “vio” in “behavior”) will be excluded as per FDA (Posner et al., 2007).                                                                                                                                                        |
| Final v3.0         | 3.1 Preface                                                 | Clarified language to indicate a separate analysis plan <b>will</b> be developed to accommodate recommendations specified by EMA.<br><br>Updated language to indicate that for publication <b>and other commercial purposes</b> of the Period #1 VBP15-004 study data, this FDA-specific SAP will be applied.                                                                                                                                         |
| Final v3.0         | 3.3 Summary of Statistical Analysis Changes to the Protocol | Clarified that spine x-ray analysis is discussed in the protocol. However, it will be presented in a separate SAP and is not included in this SAP.<br><br>Noted that analysis of DNA testing (Week 24) is mentioned as an additional exploratory endpoint in the protocol but will not be analyzed in this SAP.<br><br>Noted that exploratory biomarkers mentioned in the protocol will be stored and studied later and are not included in this SAP. |
| Final v3.0         | 4.2.1 Safety Endpoints                                      | Clarified language to indicate that the peak cortisol level after ATCH stimulation will be used to assess adrenal suppression.<br><br>Clarified language by adding BMI (kg/m <sup>2</sup> ) as a safety endpoint to the list of safety endpoints.                                                                                                                                                                                                     |
| Final              | 4.2.5                                                       | Clarified language to indicate first-in-morning serum                                                                                                                                                                                                                                                                                                                                                                                                 |

| <b>SAP Version</b> | <b>Section</b>                                                   | <b>Description of Change</b>                                                                                                                                                                                                                                                                             |
|--------------------|------------------------------------------------------------------|----------------------------------------------------------------------------------------------------------------------------------------------------------------------------------------------------------------------------------------------------------------------------------------------------------|
| v3.0               | Pharmacodynamic Endpoints                                        | cortisol levels can include fasting and non-fasting data.<br><br>Clarified language to indicate that the peak cortisol level 30 or 60 minutes after ATCH stimulation will be used to assess adrenal suppression.                                                                                         |
| Final v3.0         | 7.1.2 Modified Intent-to-Treat (mITT) Population                 | Clarified language defining the mITT population.                                                                                                                                                                                                                                                         |
| Final v3.0         | 7.1.3 Per Protocol Population                                    | Clarified language defining the Per Protocol population.                                                                                                                                                                                                                                                 |
| Final v3.0         | 7.2.2 Subgroups                                                  | Added subgroup analyses to the TTSTAND velocity summary statistics.                                                                                                                                                                                                                                      |
| Final v3.0         | 7.3.1 Data Handling                                              | Added 2D-echo interpretation and eye examination data to rules on handling unscheduled data.                                                                                                                                                                                                             |
| Final v3.0         | 7.3.2 Missing Data                                               | Added clarification regarding classification of data missing due to COVID-19.                                                                                                                                                                                                                            |
| Final v3.0         | 7.3.2.1 Handling of Missing Date Values                          | Removed imputation rules for missing AE times because time is not collected for AEs.                                                                                                                                                                                                                     |
| Final v3.0         | 7.3.2.2 Imputation Methods                                       | Added details to describe the MCMC and PMM multiple imputation analyses.                                                                                                                                                                                                                                 |
| Final v3.0         | 7.3.2.3 Assessment of impact of COVID-19 on the primary endpoint | Added details to describe the multiple imputation analyses.                                                                                                                                                                                                                                              |
| Final v3.0         | 7.3.7 Calculating Derived Variables                              | Clarified the calculation of age for the study.<br><br>Added language to clarify that the best of 3 collected results for elbow flexors and knee extensors will be analyzed.<br><br>Added details for BMI Z-score and height percentile calculation.<br><br>Added details for DXA endpoint calculations. |

| <b>SAP Version</b> | <b>Section</b>                                     | <b>Description of Change</b>                                                                                                                                                                                                                                                 |
|--------------------|----------------------------------------------------|------------------------------------------------------------------------------------------------------------------------------------------------------------------------------------------------------------------------------------------------------------------------------|
|                    |                                                    | Added details for PARS III and PODCI questionnaires.                                                                                                                                                                                                                         |
| Final v3.0         | 7.3.10 Period #1 Data Management Study Data Cutoff | Added language detailing the data cutoff performed by Data Management.                                                                                                                                                                                                       |
| Final v3.0         | 7.5.2 Study Disposition                            | Additional details added to clarify tabulations.                                                                                                                                                                                                                             |
| Final v3.0         | 7.5.4 Demographics and Baseline Characteristics    | Additional details added to clarify tabulations.                                                                                                                                                                                                                             |
| Final v3.0         | 7.5.5 Medical History                              | Additional details added to clarify tabulations.                                                                                                                                                                                                                             |
| Final v3.0         | 7.5.6 Prior and Concomitant Medications            | Additional details added to clarify tabulations.                                                                                                                                                                                                                             |
| Final v3.0         | 7.5.7 Treatment Compliance and Study Drug Exposure | Added description of administration, exposure, and compliance calculations.                                                                                                                                                                                                  |
| Final v3.0         | 7.6 Efficacy Analyses                              | <p>Added details on numerous sensitivity analyses for handling missing responses.</p> <p>Added clarification on the TTSTAND velocity responder analysis.</p> <p>Added detail on TTSTAND velocity subgroup summary tables.</p> <p>Add summary tables for TTSTAND seconds.</p> |
| Final v3.0         | 7.7.1 Adverse Events                               | Clarified that AEs with missing year from the start date will be considered treatment-emergent unless it is clear from non-missing date information that the AE started prior to first dose of study drug.                                                                   |
| Final v3.0         | 7.7.2 Vital Signs, 12-Lead ECG, and Laboratory     | <p>Added language to clarify that height percentile will be analyzed using MMRM similar to BMI Z-score.</p> <p>Clarified that only central lab data will be included in</p>                                                                                                  |

| <b>SAP Version</b> | <b>Section</b>                                      | <b>Description of Change</b>                                                                                                                                                                                                                                                                                                                                     |
|--------------------|-----------------------------------------------------|------------------------------------------------------------------------------------------------------------------------------------------------------------------------------------------------------------------------------------------------------------------------------------------------------------------------------------------------------------------|
|                    | Outcomes                                            | <p>summary tables of continuous descriptive statistics.</p> <p>Clarified that laboratory shift tables will include central and local lab data.</p> <p>Added language to clarify imputation of low/normal/high range flags and normal/abnormal range flags.</p> <p>Clarified how lab results that are below or above limit of quantification will be handled.</p> |
| Final v3.0         | 7.7.4 Other Safety Measures                         | <p>Added detail for ACTH stimulation test windowing.</p> <p>Added language to describe how DXA scan data will be analyzed.</p>                                                                                                                                                                                                                                   |
| Final v3.0         | 7.8 Exploratory Analyses                            | <p>Added language to clarify the statistical analyses being performed to compare vamorolone treatment groups to prednisone and placebo on TSQM, PARS III, and PODCI.</p> <p>Added clarification on the presentation of blindedness assessment data.</p>                                                                                                          |
| Final v3.0         | 7.9 Pharmacodynamic (PD) Serum and Other Biomarkers | <p>Added details on HbA1c analysis.</p> <p>Added language to clarify the statistical analysis for assessing adrenal suppression being performed on first-in-morning cortisol.</p>                                                                                                                                                                                |
| Final v3.0         | 9 References                                        | Additional references added.                                                                                                                                                                                                                                                                                                                                     |

1771  
 1772
