# Supplementary material for: Efficacy and Safety of Vamorolone vs Placebo and Prednisone Among Boys With Duchenne Muscular Dystrophy: A Randomized Clinical Trial
Source: PubMed Central journal article supplement (PMC9425287; doi:10.1001/jamaneurol.2022.2480), 2022-08-29
Supplement: jamaneurol-e222480-s009.pdf [file jamaneurol-e222480-s009.pdf]

## Data Sharing Statement

Guglieri. Efficacy and Safety of Vamorolone vs Placebo and Prednisone Among Boys With Duchenne Muscular Dystrophy. *JAMA Neurol.* Published August 29, 2022.

doi:10.1001/jamaneurol.2022.2480

### Data

**Data available:** Yes

**Data types:** Deidentified participant data, Data dictionary

**How to access data:** <https://cinrgresearch.org/publications/data-summary-requests/>

**When available:** With publication

### Supporting Documents

**Document types:** None

### Additional Information

**Who can access the data:** Anyone requesting the data approved by the CINRG publications committee

**Types of analyses:** For any purpose

**Mechanisms of data availability:** After approval of a proposal, with a signed data access agreement
